# Supplementary material for: AP1 is a pioneer transcription factor that programmes cell fate through MADS-domain protein tetramerisation
Source: Genome Biol. 2025 Dec 9;26:418. doi: 10.1186/s13059-025-03884-0 (PMC12687491; doi:10.1186/s13059-025-03884-0)
Supplement: Supplementary file 2 — Additional file 2: Table S1. IP-MS results on AP1WT-GFP and AP1tet-GFP inflorescences. [file 13059_2025_3884_MOESM2_ESM.xlsx]

## Sheet: AP1wtELUATE_vs_AP1wtINPUT
IP-MS results on AP1WT-GFP and AP1tet-GFP inflorescences.
Supplementary Table 1A. Output of the Perseus data post processing. Data used to plot Fig 1E.
LFQ intensity 0615_AP1_WT_Eluate_R1	LFQ intensity 0615_AP1_WT_Eluate_R2	LFQ intensity 0615_AP1_WT_Eluate_R3	LFQ intensity 0615_AP1_WT_Input_R1	LFQ intensity 0615_AP1_WT_Input_R2	LFQ intensity 0615_AP1_WT_Input_R3	LFQ intensity 1213_FrCa_1_AP1-WT-E-R1	LFQ intensity 1213_FrCa_10_AP1-WT-IN-R1	LFQ intensity 1213_FrCa_11_AP1-WT-IN-R2	LFQ intensity 1213_FrCa_12_AP1-WT-IN-R3	LFQ intensity 1213_FrCa_2_AP1-WT-E-R2	LFQ intensity 1213_FrCa_3_AP1-WT-E-R3	Only identified by site	Reverse	Potential contaminant	Family_TF	Student's T-test Significant AP1_WT_ELUATE_AP1_WT_INPUT	Student's T-test significant	Peptides	Razor + unique peptides	Unique peptides	Sequence coverage [%]	Unique + razor sequence coverage [%]	Unique sequence coverage [%]	Mol. weight [kDa]	Q-value	Score	Intensity	iBAQ peptides	MS/MS count	iBAQ	-Log Student's T-test p-value AP1_WT_ELUATE_AP1_WT_INPUT	Student's T-test q-value AP1_WT_ELUATE_AP1_WT_INPUT	Student's T-test Difference AP1_WT_ELUATE_AP1_WT_INPUT	Student's T-test Test statistic AP1_WT_ELUATE_AP1_WT_INPUT	Protein IDs	Majority protein IDs	Protein names	Gene names	id	Fasta headers	TAIR_gene
#!{Type}E	E	E	E	E	E	E	E	E	E	E	E	C	C	C	C	C	C	N	N	N	N	N	N	N	N	N	N	N	N	N	N	N	N	N	T	T	T	T	T	T	T
#!{C:Group1}AP1_WT_ELUATE	AP1_WT_ELUATE	AP1_WT_ELUATE	AP1_WT_INPUT	AP1_WT_INPUT	AP1_WT_INPUT	AP1_WT_ELUATE	AP1_WT_INPUT	AP1_WT_INPUT	AP1_WT_INPUT	AP1_WT_ELUATE	AP1_WT_ELUATE
25.3319	NaN	NaN	25.0968	25.1536	24.9723	NaN	25.2148	24.8691	25.3479	24.652	NaN							13	13	13	18.4	18.4	18.4	103.94	0	68.54	4591700000	41	59	111990000	0.230488	1	-0.117167	-0.571863	A0A178W3G2	A0A178W3G2			6	tr|A0A178W3G2|A0A178W3G2_ARATH Nucleolar-like protein OS=Arabidopsis thaliana OX=3702 GN=At1g69070 PE=1 SV=1
NaN	NaN	NaN	25.5248	24.9008	25.5195	25.9316	25.307	24.6087	25.6488	27.2922	25.2148							11	10	10	45.6	41.9	41.9	34.776	0	323.31	5531300000	12	87	460940000	1.01	0.268279	0.894602	1.91023	A0A1I9LLP0	A0A1I9LLP0			8	tr|A0A1I9LLP0|A0A1I9LLP0_ARATH Chaperone DnaJ-domain superfamily protein OS=Arabidopsis thaliana OX=3702 GN=At3g12170 PE=1 SV=1	AT3G12170
NaN	NaN	NaN	25.2145	25.9057	26.068	NaN	26.3555	26.1037	26.186	25.6426	25.9242							13	13	13	25	25	25	81.86	0	84.515	6307700000	36	65	175210000	0.252856	1	-0.188813	-0.619024	A0A1I9LQC2	A0A1I9LQC2			14	tr|A0A1I9LQC2|A0A1I9LQC2_ARATH Transmembrane protein OS=Arabidopsis thaliana OX=3702 GN=At3g28720 PE=1 SV=1	AT3G28720
NaN	NaN	NaN	24.0265	24.1067	24.1126	NaN	24.4192	24.1553	24.0379	24.4048	24.6347							9	9	9	10.7	10.7	10.7	126.36	0	15.932	1730900000	58	35	29844000	1.69622	0.0700186	0.376693	3.13769	A0A1I9LQF4;F4K735	A0A1I9LQF4;F4K735		At5g28350	15	tr|A0A1I9LQF4|A0A1I9LQF4_ARATH Quinoprotein amine dehydrogenase, beta chain-like RIC1-like guanyl-nucleotide exchange factor OS=Arabidopsis thaliana OX=3702 GN=At3g61480 PE=1 SV=1;tr|F4K735|F4K735_ARATH Quinoprotein amine dehydrogenase, beta chain-like RIC	AT3G61480;AT5G28350
NaN	23.8051	NaN	25.415	26.5687	25.5681	NaN	25.8747	25.7256	25.5357	25.669	25.0583							21	17	16	31.3	27.4	26.5	106.69	0	55.852	4241000000	53	98	80019000	1.15906	0.200168	-0.937173	-2.14294	A0A1I9LRU1	A0A1I9LRU1			20	tr|A0A1I9LRU1|A0A1I9LRU1_ARATH Mevalonate/galactokinase family protein OS=Arabidopsis thaliana OX=3702 GN=At3g42850 PE=1 SV=1	AT3G42850
NaN	NaN	NaN	21.1547	22.2566	22.3599	NaN	21.9471	21.2468	22.4593	26.3041	24.8436					+	AP1_WT_ELUATE_AP1_WT_INPUT	3	3	3	17.7	17.7	17.7	36.732	0	18.723	656070000	10	29	65607000	3.26946	0.00357218	3.66982	6.69733	A0A1I9LSA3	A0A1I9LSA3			21	tr|A0A1I9LSA3|A0A1I9LSA3_ARATH Cell wall-plasma membrane linker protein OS=Arabidopsis thaliana OX=3702 GN=CWLP PE=3 SV=1	AT3G22120
NaN	25.3912	NaN	24.7566	25.5896	25.4228	26.09	22.4427	25.821	25.0559	NaN	25.7608							4	4	4	11.7	11.7	11.7	49.222	0	12.47	3243500000	15	30	216240000	0.567872	0.646427	0.899232	1.19643	A0A1I9LSC0	A0A1I9LSC0			22	tr|A0A1I9LSC0|A0A1I9LSC0_ARATH Alba DNA/RNA-binding protein OS=Arabidopsis thaliana OX=3702 GN=At3g07030 PE=1 SV=1	AT3G07030
24.218	24.6232	NaN	23.9839	23.1089	23.6752	NaN	23.6288	23.9294	23.949	NaN	24.8032					+	AP1_WT_ELUATE_AP1_WT_INPUT	10	10	10	17.3	17.3	17.3	93.51	0	56.347	1829200000	40	38	45729000	2.09402	0.0326812	0.835614	3.66159	A0A1P8ARR1	A0A1P8ARR1			34	tr|A0A1P8ARR1|A0A1P8ARR1_ARATH Tudor/PWWP/MBT superfamily protein OS=Arabidopsis thaliana OX=3702 GN=At1g80810 PE=1 SV=1	AT1G80810
24.1965	25.4133	NaN	22.0129	21.7019	22.122	25.8384	23.0125	23.0733	22.7638	24.5452	25.1525					+	AP1_WT_ELUATE_AP1_WT_INPUT	22	22	22	26.5	26.5	26.5	137.32	0	45.426	1444400000	69	63	20934000	4.16479	0.00074394	2.58141	6.92899	A0A1P8ATM6	A0A1P8ATM6			39	tr|A0A1P8ATM6|A0A1P8ATM6_ARATH ARM repeat superfamily protein OS=Arabidopsis thaliana OX=3702 GN=HEB1 PE=1 SV=1	AT1G64960
26.2931	25.8794	25.8959	24.4718	24.6617	25.0627	25.3277	25.2303	25.3105	25.6157	25.162	26.0241							51	51	51	15.8	15.8	15.8	611.88	0	143.8	3088100000	274	157	11270000	1.76267	0.0617243	0.704917	2.84927	A0A1P8AUY4	A0A1P8AUY4			41	sp|A0A1P8AUY4|MDN1_ARATH Midasin OS=Arabidopsis thaliana OX=3702 GN=MDN1 PE=1 SV=1	AT1G67120
28.9702	28.5575	28.6917	27.6404	26.893	27.149	28.775	27.5862	26.4197	27.4038	29.3475	28.5445					+	AP1_WT_ELUATE_AP1_WT_INPUT	43	43	43	44.9	44.9	44.9	134.43	0	323.31	25047000000	48	376	521820000	4.52137	0.000420657	1.6324	7.17601	A0A1P8AVE9	A0A1P8AVE9			43	tr|A0A1P8AVE9|A0A1P8AVE9_ARATH p-loop containing nucleoside triphosphate hydrolases superfamily protein OS=Arabidopsis thaliana OX=3702 GN=At1g06720 PE=1 SV=1	AT1G06720
29.0705	29.0101	29.861	27.3444	26.9911	26.9266	28.9268	27.1974	26.7933	27.2084	28.9705	28.6211					+	AP1_WT_ELUATE_AP1_WT_INPUT	25	25	25	58.8	58.8	58.8	52.341	0	224.33	21300000000	20	354	1065000000	6.01881	4.37615e-05	1.99983	10.5659	A0A1P8AW47	A0A1P8AW47			46	tr|A0A1P8AW47|A0A1P8AW47_ARATH Transducin/WD40 repeat-like superfamily protein OS=Arabidopsis thaliana OX=3702 GN=At1g29320 PE=1 SV=1	AT1G29320
NaN	NaN	NaN	24.8861	24.5918	25.3988	NaN	24.1902	24.3425	25.4272	25.628	25.5721							14	14	14	45.3	45.3	45.3	55.837	0	71.924	3418500000	28	50	122090000	1.04851	0.248935	0.793969	2.02378	A0A1P8AWX3;F4HR92;Q9FW48	A0A1P8AWX3			48	tr|A0A1P8AWX3|A0A1P8AWX3_ARATH Leucine-rich repeat (LRR) family protein OS=Arabidopsis thaliana OX=3702 GN=At1g33590 PE=1 SV=1	AT1G33590
23.7869	24.4331	NaN	21.8474	22.9281	21.5242	23.8976	22.1889	22.7238	21.9175	24.3323	23.7917					+	AP1_WT_ELUATE_AP1_WT_INPUT	6	5	5	34.8	31.9	31.9	30.225	0	14.801	1009400000	14	29	72100000	4.08971	0.000841888	1.86002	6.77477	A0A1P8AY88	A0A1P8AY88			50	tr|A0A1P8AY88|A0A1P8AY88_ARATH Signal recognition particle receptor subunit beta OS=Arabidopsis thaliana OX=3702 GN=MSF3.15 PE=1 SV=1	AT2G18770
26.6053	25.6834	NaN	27.066	27.3913	27.363	26.8876	26.9836	28.117	28.1345	27.6413	27.9439							9	9	9	46.4	46.4	46.4	30.183	0	213.67	24452000000	13	150	1880900000	0.650148	0.548949	-0.556967	-1.30645	A0A1P8B068	A0A1P8B068			53	tr|A0A1P8B068|A0A1P8B068_ARATH Pathogenesis-related thaumatin superfamily protein OS=Arabidopsis thaliana OX=3702 GN=At2g28790 PE=1 SV=1	AT2G28790
27.5553	27.2569	27.8589	26.0258	25.8702	26.2698	27.0394	26.4585	26.0636	25.2512	26.2387	26.133					+	AP1_WT_ELUATE_AP1_WT_INPUT	10	10	10	22.6	22.6	22.6	65.266	0	244.69	7045500000	27	83	260940000	1.93639	0.0442815	1.02387	3.0832	A0A1P8B0B7	A0A1P8B0B7			54	sp|A0A1P8B0B7|IQD29_ARATH Protein IQ-DOMAIN 29 OS=Arabidopsis thaliana OX=3702 GN=IQD29 PE=1 SV=1	AT2G02790
25.1689	NaN	NaN	21.236	21.7174	23.0252	NaN	21.876	21.7356	23.0509	25.2266	25.5317					+	AP1_WT_ELUATE_AP1_WT_INPUT	17	17	17	16	16	16	177.24	0	26.829	675330000	81	22	8337500	3.68281	0.00169958	3.20223	7.02136	A0A1P8B0L2	A0A1P8B0L2			55	tr|A0A1P8B0L2|A0A1P8B0L2_ARATH Zinc finger C3H1 domain protein OS=Arabidopsis thaliana OX=3702 GN=At2g39580 PE=1 SV=1	AT2G39580
25.2415	24.7609	NaN	24.4101	24.9134	24.8427	25.0564	24.2115	24.7711	25.1058	NaN	24.9399							11	11	10	38.6	38.6	36.1	39.555	0	24.466	3452000000	18	70	191780000	0.79267	0.416325	0.290578	1.54391	A0A1P8B2U5	A0A1P8B2U5			58	tr|A0A1P8B2U5|A0A1P8B2U5_ARATH Chaperone DnaJ-domain superfamily protein OS=Arabidopsis thaliana OX=3702 GN=At2g01710 PE=1 SV=1	AT2G01710
30.1052	29.9829	29.4698	27.7592	27.5998	27.5519	29.8208	27.5541	26.8845	27.8312	28.9932	29.724					+	AP1_WT_ELUATE_AP1_WT_INPUT	107	107	107	51.8	51.8	51.8	297.52	0	323.31	32190000000	144	900	223540000	5.81878	5.77939e-05	2.15253	10.0505	A0A1P8B4E4	A0A1P8B4E4			61	tr|A0A1P8B4E4|A0A1P8B4E4_ARATH ARM repeat superfamily protein OS=Arabidopsis thaliana OX=3702 GN=At4g30990 PE=1 SV=1	AT4G30990
25.4024	25.6153	26.3622	26.7734	26.2716	26.6433	26.3153	26.6043	26.6657	27.031	26.091	26.3893					+	AP1_WT_ELUATE_AP1_WT_INPUT	17	17	17	36.4	36.4	36.4	78.155	0	323.31	15186000000	22	136	690290000	2.01144	0.038123	-0.635644	-3.18479	A0A1P8B4Y6;Q9LPY3	A0A1P8B4Y6			62	tr|A0A1P8B4Y6|A0A1P8B4Y6_ARATH Proline-rich spliceosome-associated (PSP) family protein OS=Arabidopsis thaliana OX=3702 GN=At4g21660 PE=1 SV=1	AT4G21660
27.2965	26.7261	26.7166	22.4692	21.3011	21.6477	27.9115	22.4018	22.1103	22.2051	25.6933	27.4915					+	AP1_WT_ELUATE_AP1_WT_INPUT	23	23	23	30.2	30.2	30.2	127.44	0	180.4	2186700000	64	99	34167000	7.00309	1.15618e-05	4.95007	13.4495	A0A1P8B7I1	A0A1P8B7I1			65	tr|A0A1P8B7I1|A0A1P8B7I1_ARATH Acyl-CoA N-acyltransferase with RING/FYVE/PHD-type zinc finger protein OS=Arabidopsis thaliana OX=3702 GN=At4g14920 PE=1 SV=1	AT4G14920
28.7886	28.3831	27.9975	28.3009	27.8164	27.9695	28.6618	27.8796	28.053	28.1007	29.0694	28.6661					+	AP1_WT_ELUATE_AP1_WT_INPUT	28	28	21	73.1	73.1	60.1	48.849	0	323.31	25665000000	24	440	1069400000	2.21693	0.0256952	0.574388	3.46534	A0A1P8BB34	A0A1P8BB34			71	tr|A0A1P8BB34|A0A1P8BB34_ARATH ARM repeat superfamily protein OS=Arabidopsis thaliana OX=3702 GN=At5g36230 PE=1 SV=1	AT5G36230
25.8534	NaN	NaN	22.5586	21.7852	21.7194	25.5793	22.5507	22.7747	21.5819	NaN	25.1513					+	AP1_WT_ELUATE_AP1_WT_INPUT	10	10	10	11	11	11	132.31	0	30.533	564980000	64	19	8827900	4.64983	0.000351925	3.36624	9.9308	A0A1P8BET4	A0A1P8BET4			75	tr|A0A1P8BET4|A0A1P8BET4_ARATH Uncharacterized protein OS=Arabidopsis thaliana OX=3702 GN=At5g13590 PE=1 SV=1	AT5G13590
27.3535	25.7721	24.1473	29.4335	29.4166	29.5222	27.8056	29.8143	29.3342	29.8315	27.4387	28.0034					+	AP1_WT_ELUATE_AP1_WT_INPUT	22	22	20	37	37	35.6	77.161	0	323.31	57767000000	26	324	2221800000	2.96511	0.00630931	-2.80527	-4.53461	A0A1P8BG25;Q9SD68	A0A1P8BG25			76	tr|A0A1P8BG25|A0A1P8BG25_ARATH Glycosyl hydrolase family protein OS=Arabidopsis thaliana OX=3702 GN=At5g20950 PE=1 SV=1	AT5G20950
24.5917	NaN	NaN	26.459	26.7966	26.683	NaN	26.5565	26.9126	26.7041	24.8817	NaN					+	AP1_WT_ELUATE_AP1_WT_INPUT	7	7	7	13.3	13.3	13.3	74.525	0	103.94	8531500000	17	58	501850000	5.08244	0.000178724	-1.94861	-14.0032	A0A2P2CLC5;P29388	A0A2P2CLC5;P29388	NADH-ubiquinone oxidoreductase chain 5	ND5	82	tr|A0A2P2CLC5|A0A2P2CLC5_ARATH NADH-ubiquinone oxidoreductase chain 5 OS=Arabidopsis thaliana OX=3702 GN=nad5 PE=3 SV=1;sp|P29388|NU5M_ARATH NADH-ubiquinone oxidoreductase chain 5 OS=Arabidopsis thaliana OX=3702 GN=ND5 PE=1 SV=3	ATMG00060
NaN	NaN	NaN	27.8607	26.7905	26.6238	NaN	26.8433	27.2467	27.2831	24.3086	24.4237					+	AP1_WT_ELUATE_AP1_WT_INPUT	6	6	6	11.4	11.4	11.4	55.45	0	13.056	11173000000	10	41	1117300000	3.72483	0.00157839	-2.74191	-8.11127	O05000;A0A2P2CLE9;Q3EC49	O05000;A0A2P2CLE9	NADH-ubiquinone oxidoreductase chain 2	ND2	83	sp|O05000|NU2M_ARATH NADH-ubiquinone oxidoreductase chain 2 OS=Arabidopsis thaliana OX=3702 GN=ND2 PE=1 SV=2;tr|A0A2P2CLE9|A0A2P2CLE9_ARATH NADH dehydrogenase subunit 2 OS=Arabidopsis thaliana OX=3702 GN=nad2 PE=3 SV=2	ATMG00285
25.5136	26.4469	NaN	28.5193	27.8098	27.403	26.2519	27.1677	27.8085	27.3945	26.6305	26.6628					+	AP1_WT_ELUATE_AP1_WT_INPUT	7	7	7	34.6	34.6	34.6	29.684	0	97.994	19826000000	7	115	2832300000	3.00821	0.00576126	-1.38266	-4.79445	A0A2P2CLF0;P93285	A0A2P2CLF0;P93285	Cytochrome c oxidase subunit 2	COX2	84	tr|A0A2P2CLF0|A0A2P2CLF0_ARATH Cytochrome c oxidase subunit 2 OS=Arabidopsis thaliana OX=3702 GN=cox2 PE=3 SV=2;sp|P93285|COX2_ARATH Cytochrome c oxidase subunit 2 OS=Arabidopsis thaliana OX=3702 GN=COX2 PE=1 SV=2	ATMG00160
25.2143	25.7747	26.4458	25.3337	25.0546	24.9138	25.8294	22.2959	21.7876	24.3823	25.5695	25.5563							4	4	4	35.8	35.8	35.8	17.227	0	12.181	2811200000	9	36	312360000	1.68258	0.0719537	1.77037	2.74178	A0A2P2CLF5;P92557	A0A2P2CLF5;P92557	Ribosomal protein S7, mitochondrial	RPS7	85	tr|A0A2P2CLF5|A0A2P2CLF5_ARATH Ribosomal protein S7 OS=Arabidopsis thaliana OX=3702 GN=rps7 PE=3 SV=1;sp|P92557|RT07_ARATH Ribosomal protein S7, mitochondrial OS=Arabidopsis thaliana OX=3702 GN=RPS7 PE=1 SV=1	AT2G07696
24.5519	NaN	NaN	29.608	28.9083	28.4615	27.3166	28.7406	29.1476	28.9047	27.4369	27.0322					+	AP1_WT_ELUATE_AP1_WT_INPUT	14	14	14	78.9	78.9	78.9	22.881	0	72.311	38469000000	12	208	3205800000	2.48367	0.0154135	-2.37737	-4.13331	A0A2P2CLF6;Q95748	A0A2P2CLF6;Q95748	NADH dehydrogenase [ubiquinone] iron-sulfur protein 3	NAD9	86	tr|A0A2P2CLF6|A0A2P2CLF6_ARATH NADH dehydrogenase subunit 9 OS=Arabidopsis thaliana OX=3702 GN=nad9 PE=3 SV=1;sp|Q95748|NDUS3_ARATH NADH dehydrogenase [ubiquinone] iron-sulfur protein 3 OS=Arabidopsis thaliana OX=3702 GN=NAD9 PE=1 SV=2	ATMG00070
28.7182	28.5823	29.1118	32.0407	32.0301	31.6292	29.211	31.6852	31.8647	31.4418	29.648	29.449					+	AP1_WT_ELUATE_AP1_WT_INPUT	29	29	28	57.4	57.4	56	55.103	0	323.31	254720000000	27	820	9434100000	7.08479	1.01426e-05	-2.66189	-13.7177	A0A2P2CLF9;P92549;F4IMB5	A0A2P2CLF9;P92549;F4IMB5	ATP synthase subunit alpha, mitochondrial;ATP synthase subunit alpha	ATPA;At2g07698	87	tr|A0A2P2CLF9|A0A2P2CLF9_ARATH ATP synthase subunit alpha OS=Arabidopsis thaliana OX=3702 GN=atp1 PE=3 SV=1;sp|P92549|ATPAM_ARATH ATP synthase subunit alpha, mitochondrial OS=Arabidopsis thaliana OX=3702 GN=ATPA PE=1 SV=2;tr|F4IMB5|F4IMB5_ARATH ATP synthas	AT2G07698;ATMG01190
NaN	25.038	NaN	24.9379	25.1551	25.0943	24.9093	24.8912	24.9393	24.5763	25.5753	25.6269							7	7	7	24.1	24.1	24.1	37.929	0	16.068	3945700000	17	47	232100000	1.09106	0.228377	0.355016	1.99546	A0A2P2CLG6;F4IMC7;P93311	A0A2P2CLG6;F4IMC7;P93311	60S ribosomal protein L2, mitochondrial	At2g07715;RPL2	89	tr|A0A2P2CLG6|A0A2P2CLG6_ARATH Ribosomal protein L2 OS=Arabidopsis thaliana OX=3702 GN=rpl2 PE=3 SV=1;tr|F4IMC7|F4IMC7_ARATH Nucleic acid-binding, OB-fold-like protein OS=Arabidopsis thaliana OX=3702 GN=At2g07715 PE=3 SV=1;sp|P93311|RM02_ARATH 60S ribosoma	AT2G07715;ATMG00560
27.2193	26.929	26.1901	29.8808	29.3613	29.0718	27.3571	29.2577	29.5751	29.2747	27.5595	27.457					+	AP1_WT_ELUATE_AP1_WT_INPUT	19	19	19	61.4	61.4	61.4	45.003	0	247.75	55011000000	21	344	2619600000	5.65837	7.36447e-05	-2.28489	-9.65253	A0A2P2CLH2;P93306	A0A2P2CLH2;P93306	NADH dehydrogenase [ubiquinone] iron-sulfur protein 2	NAD7	92	tr|A0A2P2CLH2|A0A2P2CLH2_ARATH NADH dehydrogenase subunit 7 OS=Arabidopsis thaliana OX=3702 GN=nad7 PE=3 SV=1;sp|P93306|NDUS2_ARATH NADH dehydrogenase [ubiquinone] iron-sulfur protein 2 OS=Arabidopsis thaliana OX=3702 GN=NAD7 PE=1 SV=2	ATMG00510
27.0219	26.9685	26.661	27.9761	28.0028	27.8777	26.6826	27.7309	27.9107	27.4926	26.5344	26.613					+	AP1_WT_ELUATE_AP1_WT_INPUT	8	8	8	47.4	47.4	47.4	21.707	0	207.63	16847000000	12	83	1403900000	5.63759	7.52764e-05	-1.0849	-9.60193	A0A2P2CLH9;Q04613;Q9SD55	A0A2P2CLH9;Q04613	ATP synthase protein MI25	AtMg00640	94	tr|A0A2P2CLH9|A0A2P2CLH9_ARATH ATP synthase protein MI25 OS=Arabidopsis thaliana OX=3702 GN=atp4 PE=3 SV=1;sp|Q04613|MI25_ARATH ATP synthase protein MI25 OS=Arabidopsis thaliana OX=3702 GN=AtMg00640 PE=1 SV=2	ATMG00640
NaN	NaN	NaN	27.5221	26.4332	26.0529	NaN	26.2886	26.0554	26.271	25.5954	25.235							9	9	9	30.7	30.7	30.7	44.019	0	220.6	7452200000	21	110	354870000	1.29416	0.155206	-1.022	-2.43527	A1A6M1	A1A6M1		PTAC5	97	sp|A1A6M1|PTAC5_ARATH Protein disulfide isomerase pTAC5, chloroplastic OS=Arabidopsis thaliana OX=3702 GN=PTAC5 PE=1 SV=1	AT4G13670
NaN	25.5683	NaN	26.3833	26.1648	26.0466	NaN	25.5434	26.3372	26.1064	25.9695	NaN							11	11	11	34.1	34.1	34.1	50.516	0	323.31	6181200000	17	74	363600000	0.644632	0.554666	-0.328056	-1.3469	A2RVJ8	A2RVJ8		At5g10010	100	sp|A2RVJ8|HIT4_ARATH Protein HEAT INTOLERANT 4 OS=Arabidopsis thaliana OX=3702 GN=HIT4 PE=1 SV=1	AT5G10010
NaN	NaN	25.6814	30.3498	29.4903	29.6986	24.28	28.8006	29.7024	28.549	26.6472	24.951					+	AP1_WT_ELUATE_AP1_WT_INPUT	17	17	14	51	51	47.7	33.599	0	323.31	79087000000	13	247	6083600000	4.25016	0.000650957	-4.04191	-7.72324	A2RVS6	A2RVS6	Serine/arginine-rich splicing factor SR34A	SR34A	101	sp|A2RVS6|SR34A_ARATH Serine/arginine-rich splicing factor SR34A OS=Arabidopsis thaliana OX=3702 GN=SR34A PE=2 SV=1	AT3G49430
NaN	NaN	NaN	24.1429	24.2994	24.3376	NaN	23.9562	24.0896	24.3211	24.9722	25.3034					+	AP1_WT_ELUATE_AP1_WT_INPUT	11	11	11	33.8	33.8	33.8	60.145	0	64.429	2357400000	25	32	94295000	3.31669	0.00329281	0.946656	6.83384	A3KPF3	A3KPF3		At3g02710	104	tr|A3KPF3|A3KPF3_ARATH ARM repeat superfamily protein OS=Arabidopsis thaliana OX=3702 GN=At3g02710 PE=1 SV=1	AT3G02710
28.7182	28.4277	29.4786	28.6881	28.39	28.5724	28.8857	28.6242	28.6011	28.7748	27.5485	28.3043							29	29	29	61.8	61.8	61.8	65.127	0	323.31	43135000000	29	389	1487400000	0.0645349	1	-0.0479358	-0.178472	A4FVN8	A4FVN8		At1g10580	106	tr|A4FVN8|A4FVN8_ARATH At1g10580 OS=Arabidopsis thaliana OX=3702 GN=At1g10580 PE=1 SV=1	AT1G10580
NaN	NaN	27.165	30.1993	29.2732	29.7742	NaN	29.7424	30.1766	29.8771	24.5576	23.9521					+	AP1_WT_ELUATE_AP1_WT_INPUT	98	98	98	51.9	51.9	51.9	237.04	0	323.31	107650000000	118	783	912260000	3.60526	0.00197028	-4.61559	-6.82216	A4GSN8	A4GSN8	Nuclear-pore anchor	NUA	109	sp|A4GSN8|NUA_ARATH Nuclear-pore anchor OS=Arabidopsis thaliana OX=3702 GN=NUA PE=1 SV=1	AT1G79280
28.4696	27.8463	27.1766	23.2527	22.5735	22.1823	28.6357	23.232	24.5109	23.6966	27.2493	28.8315					+	AP1_WT_ELUATE_AP1_WT_INPUT	46	46	46	36.6	36.6	36.6	206.76	0	221.37	7323000000	98	206	74724000	6.0897	4.05925e-05	4.79352	10.7538	A5HEI1	A5HEI1		EMB2773	111	sp|A5HEI1|SCC2_ARATH Sister chromatid cohesion protein SCC2 OS=Arabidopsis thaliana OX=3702 GN=SCC2 PE=1 SV=1	AT5G15540
25.3886	25.666	NaN	26.5134	25.8255	25.8457	25.6065	26.0673	25.916	26.0374	26.0525	25.4481							14	14	14	23.3	23.3	23.3	99.863	0	79.778	6702500000	46	142	145710000	1.52741	0.0968897	-0.4019	-2.58017	A8MPR5	A8MPR5		EMB2083	114	sp|A8MPR5|FTSI2_ARATH Probable inactive ATP-dependent zinc metalloprotease FTSHI 2, chloroplastic OS=Arabidopsis thaliana OX=3702 GN=FTSHI2 PE=1 SV=1	AT3G16290
25.6178	NaN	NaN	24.2994	23.7238	24.0803	25.4899	24.793	24.5978	24.6522	24.5095	NaN							14	14	14	27.1	27.1	27.1	71.851	0	75.147	2325900000	32	62	72686000	1.41746	0.120989	0.847979	2.54752	A8MQR0	A8MQR0	WPP domain-interacting tail-anchored protein 2	WIT2	118	sp|A8MQR0|WIT2_ARATH WPP domain-interacting tail-anchored protein 2 OS=Arabidopsis thaliana OX=3702 GN=WIT2 PE=1 SV=1	AT1G68910
27.9395	27.9435	26.1037	28.5163	28.296	28.6233	27.8679	28.4957	28.8528	28.8949	27.434	28.0843					+	AP1_WT_ELUATE_AP1_WT_INPUT	68	68	68	49.5	49.5	49.5	185.03	0	323.31	48056000000	84	522	572100000	2.09031	0.03293	-1.05104	-3.292	A8MS85;Q9CAM1	A8MS85		GTB1	123	sp|A8MS85|SPT61_ARATH Transcription elongation factor SPT6 homolog OS=Arabidopsis thaliana OX=3702 GN=SPT6 PE=1 SV=1	AT1G65440
26.2032	24.9967	24.6846	21.851	22.3888	24.4413	26.3149	24.3896	24.7758	24.4807	25.4549	26.3064					+	AP1_WT_ELUATE_AP1_WT_INPUT	8	8	8	15.4	15.4	15.4	70.014	0	14.965	3054700000	24	36	127280000	2.07926	0.0336482	1.93891	3.27695	A9LNK9	A9LNK9	30-kDa cleavage and polyadenylation specificity factor 30	CPSF30	128	sp|A9LNK9|CPSF_ARATH 30-kDa cleavage and polyadenylation specificity factor 30 OS=Arabidopsis thaliana OX=3702 GN=CPSF30 PE=1 SV=1	AT1G30460
31.8318	31.5721	31.9084	30.1858	29.8085	30.1623	31.6372	30.1911	30.1099	30.1935	30.9961	31.3446					+	AP1_WT_ELUATE_AP1_WT_INPUT	94	94	94	61.8	61.8	61.8	181.45	0	323.31	132400000000	85	1460	1557700000	5.6281	7.59238e-05	1.43988	9.57891	B3H5K3	B3H5K3		At5g47690	133	tr|B3H5K3|B3H5K3_ARATH Binding protein OS=Arabidopsis thaliana OX=3702 GN=At5g47690 PE=1 SV=1	AT5G47690
NaN	NaN	NaN	24.366	25.4014	25.1975	NaN	25.4305	25.061	25.2721	25.5559	25.1486							8	8	8	30.3	30.3	30.3	43.8	0	15.091	3363200000	16	51	210200000	0.315779	1	0.230858	0.746987	B3H7H1	B3H7H1		At3g07300	140	tr|B3H7H1|B3H7H1_ARATH AT3G07300 protein OS=Arabidopsis thaliana OX=3702 GN=At3g07300 PE=1 SV=1	AT3G07300
26.442	26.3462	26.2662	27.1533	26.7991	27.189	27.0483	26.4881	26.8714	26.8202	26.9924	27.2934							19	19	19	66.5	66.5	66.5	50.445	0	102.6	12105000000	25	172	484210000	0.330859	1	-0.15544	-0.756476	B4F7N8	B4F7N8		At5g18420	143	tr|B4F7N8|B4F7N8_ARATH CCR4-NOT transcription complex subunit 11 OS=Arabidopsis thaliana OX=3702 GN=At5g18420 PE=1 SV=1	AT5G18420
24.6965	NaN	25.4542	23.5643	23.6064	23.6674	24.2283	24.0657	23.4459	24.2022	25.046	24.6869					+	AP1_WT_ELUATE_AP1_WT_INPUT	22	22	22	17.2	17.2	17.2	227.05	0	66.263	2312000000	106	77	21811000	2.90914	0.00691769	1.06372	4.63226	B5BT18	B5BT18	TATA-binding protein-associated factor BTAF1	BTAF1	144	sp|B5BT18|BTAF1_ARATH TATA-binding protein-associated factor BTAF1 OS=Arabidopsis thaliana OX=3702 GN=BTAF1 PE=1 SV=1	AT3G54280
26.5659	26.4138	24.6654	26.0985	26.2099	26.2662	26.8471	25.9594	25.7209	26.3958	26.4144	26.3161							27	27	27	36.7	36.7	36.7	124.09	0	177.17	10989000000	55	209	199800000	0.108036	1	0.0953239	0.287276	B5X0I6	B5X0I6	Protein CTR9 homolog	VIP6	145	sp|B5X0I6|VIP6_ARATH Protein CTR9 homolog OS=Arabidopsis thaliana OX=3702 GN=VIP6 PE=1 SV=1	AT2G06210
27.6845	25.9498	24.7613	28.4271	27.7036	27.6809	27.6076	28.1539	27.876	28.3535	28.0842	27.1832							27	27	27	58.2	58.2	58.2	66.883	0	323.31	30871000000	32	280	964710000	1.24744	0.169619	-1.15408	-2.15519	B5X503	B5X503		At5g11240	146	tr|B5X503|B5X503_ARATH At5g11240 OS=Arabidopsis thaliana OX=3702 GN=At5g11240 PE=1 SV=1	AT5G11240
NaN	NaN	NaN	24.6477	24.1084	24.4278	24.975	24.407	24.8075	24.6577	26.7685	25.0908							23	23	23	28.8	28.8	28.8	132.44	0	60.468	2864700000	57	63	50258000	1.51725	0.0989145	1.10208	2.7056	B9DFG3	B9DFG3	DEAD-box ATP-dependent RNA helicase ISE2, chloroplastic	ISE2	155	sp|B9DFG3|ISE2_ARATH DExH-box ATP-dependent RNA helicase DExH15 chloroplastic OS=Arabidopsis thaliana OX=3702 GN=ISE2 PE=1 SV=2	AT1G70070
26.2951	25.4123	NaN	28.5415	28.429	28.7017	27.4237	28.4172	28.7785	28.1396	25.6938	27.5103					+	AP1_WT_ELUATE_AP1_WT_INPUT	35	35	34	70	70	67	69.622	0	312.88	30519000000	36	301	847750000	3.15252	0.00439719	-2.0342	-5.03575	B9DFI7;Q9ZW75	B9DFI7	Probable methyltransferase PMT2		156	sp|B9DFI7|PMT2_ARATH Probable methyltransferase PMT2 OS=Arabidopsis thaliana OX=3702 GN=At1g26850 PE=2 SV=2	AT1G26850
25.4013	NaN	25.1911	26.5446	26.2336	26.3665	25.1942	26.5447	26.8554	26.4841	26.1747	26.1796					+	AP1_WT_ELUATE_AP1_WT_INPUT	11	11	11	38.7	38.7	38.7	44.002	0	19.598	7120700000	23	46	309600000	2.42831	0.0171809	-0.876657	-3.88028	B9DGC0	B9DGC0		At2g34560	160	tr|B9DGC0|B9DGC0_ARATH AT2G34560 protein OS=Arabidopsis thaliana OX=3702 GN=CCP1 PE=1 SV=1	AT2G34560
32.4913	32.7961	32.4782	32.1493	32.3718	32.2191	32.1571	31.7429	31.9511	32.1984	32.8359	32.7914					+	AP1_WT_ELUATE_AP1_WT_INPUT	33	33	4	80.9	80.9	12.2	49.54	0	323.31	437740000000	21	1555	20845000000	2.19144	0.0269225	0.486252	3.4303	Q0WV25;B9DGT7	Q0WV25;B9DGT7	Tubulin alpha-4 chain;Tubulin alpha-2 chain	TUBA4;TUBA2	162	sp|Q0WV25|TBA4_ARATH Tubulin alpha-4 chain OS=Arabidopsis thaliana OX=3702 GN=TUBA4 PE=2 SV=2;sp|B9DGT7|TBA2_ARATH Tubulin alpha-2 chain OS=Arabidopsis thaliana OX=3702 GN=TUBA2 PE=2 SV=2	AT1G04820;AT1G50010
28.9294	29.1951	29.1465	28.4963	28.8805	28.6814	28.5596	28.1247	28.8404	28.6261	29.3125	29.4458							30	11	9	67.6	33.1	24.7	49.654	0	323.31	35738000000	20	317	1786900000	1.77446	0.0604315	0.489887	2.86511	Q56WH1;B9DHQ0	Q56WH1;B9DHQ0	Tubulin alpha-3 chain;Tubulin alpha-5 chain	TUBA3;TUBA5	167	sp|Q56WH1|TBA3_ARATH Tubulin alpha-3 chain OS=Arabidopsis thaliana OX=3702 GN=TUBA3 PE=1 SV=2;sp|B9DHQ0|TBA5_ARATH Tubulin alpha-5 chain OS=Arabidopsis thaliana OX=3702 GN=TUBA5 PE=1 SV=2	AT5G19770;AT5G19780
25.7412	24.914	23.1792	24.2717	24.8721	24.8846	26.1017	24.5763	24.1633	24.4785	25.2421	25.1741							12	11	11	35.9	34.2	34.2	44.265	0	37.653	2452300000	23	72	106620000	0.587389	0.622635	0.51764	1.19787	C0SUW7	C0SUW7	AT-rich interactive domain-containing protein 6	ARID6	181	sp|C0SUW7|ARID6_ARATH AT-rich interactive domain-containing protein 6 OS=Arabidopsis thaliana OX=3702 GN=ARID6 PE=1 SV=1	AT1G20910
26.5674	26.1853	25.0859	22.43	22.1576	21.453	27.6312	23.0598	22.1517	21.6963	25.9438	27.6323					+	AP1_WT_ELUATE_AP1_WT_INPUT	28	25	25	48.4	45.7	45.7	70.199	0	303.75	5560100000	24	157	231670000	5.50887	9.27738e-05	4.34958	9.2934	C0SV51;Q0WVV6;F4JR57;F4IPM3	C0SV51	Calmodulin-binding protein 60 C	CBP60C	182	sp|C0SV51|CB60C_ARATH Calmodulin-binding protein 60 C OS=Arabidopsis thaliana OX=3702 GN=CBP60C PE=2 SV=1	AT2G18750
NaN	NaN	NaN	25.2383	25.4504	25.5391	NaN	25.5529	25.3744	25.1014	24.6541	24.695					+	AP1_WT_ELUATE_AP1_WT_INPUT	13	13	13	25.4	25.4	25.4	88.608	0	26.896	2879200000	39	44	73827000	2.73075	0.00965503	-0.701484	-5.28355	F4HQ84	F4HQ84		At1g73430	237	sp|F4HQ84|COG3_ARATH Conserved oligomeric Golgi complex subunit 3 OS=Arabidopsis thaliana OX=3702 GN=COG3 PE=1 SV=1	AT1G73430
25.1332	NaN	NaN	25.7308	25.5992	25.7264	25.757	26.1382	26.254	25.8752	25.9049	26.309							25	25	7	33.4	33.4	10.4	131.24	0	161.11	5988300000	66	106	90732000	0.189605	1	-0.111249	-0.476821	F4HQ88	F4HQ88		At1g73460	239	tr|F4HQ88|F4HQ88_ARATH Protein kinase superfamily protein OS=Arabidopsis thaliana OX=3702 GN=At1g73460 PE=1 SV=1	AT1G73460
25.0452	24.0474	23.7538	30.4732	29.8727	29.9798	26.2298	29.9058	30.0743	30.2012	28.0106	26.4564					+	AP1_WT_ELUATE_AP1_WT_INPUT	63	63	61	50.3	50.3	49.6	129.09	0	323.31	106630000000	54	615	1974600000	4.29432	0.000611677	-4.49396	-6.7443	F4HRT5	F4HRT5	Protein CROWDED NUCLEI 1	CRWN1	248	sp|F4HRT5|CRWN1_ARATH Protein CROWDED NUCLEI 1 OS=Arabidopsis thaliana OX=3702 GN=CRWN1 PE=1 SV=1	AT1G67230
25.562	NaN	24.2375	27.4542	25.7946	26.2264	25.3816	26.4181	26.2168	26.4693	26.6433	26.1565							24	24	18	22.2	22.2	18.5	198.77	0	119.09	8495600000	82	123	103600000	1.03003	0.257871	-0.833728	-1.87655	F4HS99	F4HS99		At1g01320	249	tr|F4HS99|F4HS99_ARATH Tetratricopeptide repeat (TPR)-like superfamily protein OS=Arabidopsis thaliana OX=3702 GN=At1g01320 PE=1 SV=1	AT1G01320
24.2947	24.623	23.3794	23.0742	20.3338	22.373	23.9945	21.809	22.5088	22.9395	24.1312	24.1395					+	AP1_WT_ELUATE_AP1_WT_INPUT	8	8	8	7.8	7.8	7.8	145.45	0	10.75	555540000	61	17	9107200	2.8247	0.00808353	1.92066	4.32671	F4HSZ1	F4HSZ1			251	tr|F4HSZ1|F4HSZ1_ARATH Symplekin OS=Arabidopsis thaliana OX=3702 GN=At1g27595 PE=1 SV=1	AT1G27595
28.2296	27.6305	27.7453	28.3218	28.2994	28.4921	27.7253	28.3062	28.686	28.6399	28.9373	28.6825							71	71	71	42	42	42	269.88	0	323.31	37399000000	107	514	349530000	0.630034	0.572291	-0.299137	-1.26544	F4HVV6;REV__F4JCM7	F4HVV6		At1g02080	265	tr|F4HVV6|F4HVV6_ARATH Transcription regulator OS=Arabidopsis thaliana OX=3702 GN=At1g02080 PE=1 SV=1	AT1G02080
27.8029	28.4268	27.7618	27.4312	27.6041	27.6487	27.169	27.0538	27.1638	27.137	27.3177	27.8962							24	21	21	48.8	45.6	45.6	72.092	0	269.41	13395000000	30	204	446520000	1.025	0.260363	0.389275	1.84766	F4HVX7;F4IR05	F4HVX7	Protein CER1-like 1		267	sp|F4HVX7|CERL1_ARATH Protein CER1-like 1 OS=Arabidopsis thaliana OX=3702 GN=At1g02190 PE=2 SV=1	AT1G02190
29.1973	29.0337	27.6925	29.076	28.6679	28.6423	28.4795	28.7082	28.7183	28.6699	28.8972	28.9744							31	31	28	57.1	57.1	53.9	72.405	0	295.14	38524000000	33	421	1167400000	0.0524907	1	-0.0346448	-0.146869	F4HVY0	F4HVY0	Protein ECERIFERUM 1	CER1	268	sp|F4HVY0|CER1_ARATH Very-long-chain aldehyde decarbonylase CER1 OS=Arabidopsis thaliana OX=3702 GN=CER1 PE=1 SV=1	AT1G02205
30.0347	29.6164	28.7147	23.2487	21.8664	22.1237	29.5737	22.4096	24.3663	22.3934	28.7797	29.7778					+	AP1_WT_ELUATE_AP1_WT_INPUT	49	49	49	45.7	45.7	45.7	168.17	0	323.31	13035000000	81	332	160920000	7.5281	7.57047e-06	6.68146	15.2598	F4HW51	F4HW51	Protein CHROMATIN REMODELING 20	ATRX	271	sp|F4HW51|CHR20_ARATH Protein CHROMATIN REMODELING 20 OS=Arabidopsis thaliana OX=3702 GN=ATRX PE=2 SV=2	AT1G08600
NaN	NaN	NaN	25.7133	26.9431	26.045	NaN	26.359	25.6575	26.0822	24.8087	24.6785					+	AP1_WT_ELUATE_AP1_WT_INPUT	7	7	7	25.7	25.7	25.7	34.293	0	14.597	4553200000	14	33	325230000	2.11026	0.0315431	-1.38977	-3.92493	F4HWR0;Q9LZJ2	F4HWR0		At1g47980	276	tr|F4HWR0|F4HWR0_ARATH Desiccation-like protein OS=Arabidopsis thaliana OX=3702 GN=At1g47980 PE=1 SV=1	AT1G47980
NaN	NaN	NaN	24.5124	25.3498	24.8131	NaN	24.6863	24.6576	24.6363	24.8459	25.0014							29	15	9	24.8	15.7	9	173.61	0	24.772	2210000000	87	38	25402000	0.271601	1	0.147712	0.657831	F4HWY6	F4HWY6	Myosin-11	XI-E	278	sp|F4HWY6|MYO11_ARATH Myosin-11 OS=Arabidopsis thaliana OX=3702 GN=XI-E PE=3 SV=1	AT1G54560
29.0727	29.5167	29.6682	28.7828	29.1076	28.8236	29.5839	28.9525	28.4693	28.9774	30.5181	29.3629					+	AP1_WT_ELUATE_AP1_WT_INPUT	9	9	9	63.1	63.1	63.1	16.848	0	215.73	51551000000	10	334	5155100000	2.25578	0.0239566	0.768223	3.51885	F4HXM8	F4HXM8		At1g02813	280	tr|F4HXM8|F4HXM8_ARATH Uncharacterized protein OS=Arabidopsis thaliana OX=3702 GN=At1g02813 PE=1 SV=1	AT1G02813
25.8823	25.9009	23.8408	30.5775	30.1312	30.1173	25.3299	30.3203	30.1992	30.3542	27.8067	27.8536					+	AP1_WT_ELUATE_AP1_WT_INPUT	72	72	72	63.9	63.9	63.9	160.01	0	323.31	110440000000	75	824	1472500000	4.23362	0.000668841	-4.18093	-6.63196	F4HXV6	F4HXV6	Nuclear pore complex protein NUP155	NUP155	281	sp|F4HXV6|NU155_ARATH Nuclear pore complex protein NUP155 OS=Arabidopsis thaliana OX=3702 GN=NUP155 PE=1 SV=1	AT1G14850
27.141	26.4173	25.9183	25.9541	24.7321	24.5938	27.9947	25.1884	23.7115	25.5931	26.2757	27.4163				HB-other	+	AP1_WT_ELUATE_AP1_WT_INPUT	43	43	41	35.5	35.5	34.4	191.99	0	323.31	8257900000	81	228	101950000	2.70132	0.0101816	1.89838	4.1471	F4HY56	F4HY56		HB-1	286	sp|F4HY56|RLT1_ARATH Homeobox-DDT domain protein RLT1 OS=Arabidopsis thaliana OX=3702 GN=RLT1 PE=1 SV=1	AT1G28420
NaN	NaN	NaN	24.0902	23.9778	24.0799	25.1397	24.5934	24.6275	24.585	25.101	NaN					+	AP1_WT_ELUATE_AP1_WT_INPUT	11	11	11	13.7	13.7	13.7	134.25	0	28.094	2082100000	64	28	32533000	1.88477	0.0486283	0.794731	3.48651	F4HYJ7;F4IM84	F4HYJ7		At1g48650	291	sp|F4HYJ7|DEXH3_ARATH DExH-box ATP-dependent RNA helicase DExH3 OS=Arabidopsis thaliana OX=3702 GN=At1g48650 PE=3 SV=1	AT1G48650
26.8328	26.8087	26.6301	25.8615	25.8115	25.9729	26.9967	25.8194	25.3299	25.8628	27.5165	27.1531					+	AP1_WT_ELUATE_AP1_WT_INPUT	22	22	21	42.9	42.9	41.3	73.295	0	85.544	7707800000	35	130	220220000	4.77962	0.000289641	1.2133	7.69035	F4HYR4	F4HYR4		At1g62330	293	sp|F4HYR4|OFT15_ARATH O-fucosyltransferase 15 OS=Arabidopsis thaliana OX=3702 GN=OFUT15 PE=2 SV=1	AT1G62330
25.6746	NaN	24.5734	27.0677	26.3802	25.4701	26.1073	26.8305	27.0345	26.5129	25.7133	NaN							14	14	14	5.7	5.7	5.7	400.89	0	24.854	7760900000	170	68	45652000	1.48466	0.105395	-1.0322	-2.57717	F4HZB2;F4JHT3	F4HZB2		SPI	295	sp|F4HZB2|BCHA1_ARATH Protein SPIRRIG OS=Arabidopsis thaliana OX=3702 GN=SPI PE=1 SV=1	AT1G03060
28.1228	28.0166	28.0222	26.3022	25.8815	25.9482	28.4919	25.4723	25.8616	25.8004	26.7981	28.1141					+	AP1_WT_ELUATE_AP1_WT_INPUT	30	30	30	40.5	40.5	40.5	107.23	0	140.02	8939600000	52	184	171910000	4.86282	0.000252155	2.04992	7.86164	F4HZD1	F4HZD1		At1g09060	297	tr|F4HZD1|F4HZD1_ARATH JmjC domain protein JMJ24 OS=Arabidopsis thaliana OX=3702 GN=At1g09060 PE=1 SV=1	AT1G09060
NaN	24.7371	24.1383	27.654	27.7471	27.6067	NaN	27.6714	27.7233	27.7766	25.6872	NaN					+	AP1_WT_ELUATE_AP1_WT_INPUT	17	17	17	38.3	38.3	38.3	54.445	0	323.31	28285000000	22	138	1285700000	4.53815	0.000414382	-2.84233	-9.54971	F4HZI8	F4HZI8		At1g15200	298	tr|F4HZI8|F4HZI8_ARATH Protein-protein interaction regulator family protein OS=Arabidopsis thaliana OX=3702 GN=At1g15200 PE=1 SV=1	AT1G15200
24.2217	24.7769	NaN	23.9384	23.1708	23.3757	24.363	25.032	24.7087	25.0796	24.8066	NaN							16	14	14	15.7	14.3	14.3	177.63	0	39.099	1507400000	84	51	17945000	0.313391	1	0.324519	0.730422	F4HZK4	F4HZK4		At1g15290	300	tr|F4HZK4|F4HZK4_ARATH Tetratricopeptide repeat (TPR)-like superfamily protein OS=Arabidopsis thaliana OX=3702 GN=At1g15290 PE=1 SV=1	AT1G15290
27.2625	26.5945	27.8197	23.271	25.361	25.1086	28.3132	22.7608	22.8972	25.1508	26.5294	27.6216					+	AP1_WT_ELUATE_AP1_WT_INPUT	35	35	35	30.9	30.9	30.9	208.46	0	100.8	5621000000	91	174	61769000	3.65714	0.00177531	3.26523	5.62405	F4I096	F4I096	Mediator of RNA polymerase II transcription subunit 13	MED13	304	sp|F4I096|MED13_ARATH Mediator of RNA polymerase II transcription subunit 13 OS=Arabidopsis thaliana OX=3702 GN=MED13 PE=1 SV=1	AT1G55325
28.8985	28.5335	28.2052	28.9691	28.2327	28.3143	29.2009	28.5906	28.7476	28.5434	28.7405	28.5127							25	25	25	56.7	56.7	56.7	68.979	0	323.31	43375000000	27	538	1606500000	0.272002	1	0.115575	0.643204	F4I0K2	F4I0K2	Fructokinase-like 2, chloroplastic	FLN2	305	sp|F4I0K2|SCKL2_ARATH Fructokinase-like 2, chloroplastic OS=Arabidopsis thaliana OX=3702 GN=FLN2 PE=1 SV=2	AT1G69200
29.2026	29.7237	29.9484	31.4104	31.5861	31.6423	29.6395	31.4877	31.0484	31.7347	32.11	31.1755							40	40	40	54.5	54.5	54.5	123.45	0	301.54	122510000000	53	362	2311500000	1.5465	0.093487	-1.18502	-2.55921	F4I116	F4I116		At1g09620	307	sp|F4I116|SYLC_ARATH Leucine--tRNA ligase, cytoplasmic OS=Arabidopsis thaliana OX=3702 GN=At1g09620 PE=1 SV=1	AT1G09620
27.8909	26.7861	26.7174	22.7724	26.5587	21.2769	27.0972	22.5196	23.1606	26.8231	27.4054	27.6704					+	AP1_WT_ELUATE_AP1_WT_INPUT	15	15	15	18.4	18.4	18.4	114.86	0	49.27	10114000000	56	37	180610000	2.29393	0.0222397	3.40937	3.57157	F4I2I5	F4I2I5		At1g03830	319	tr|F4I2I5|F4I2I5_ARATH Guanylate-binding family protein OS=Arabidopsis thaliana OX=3702 GN=At1g03830 PE=1 SV=1	AT1G03830
28.226	28.7029	29.6783	28.4875	28.0977	28.0146	28.5612	28.3064	28.0381	28.396	27.8442	28.1382							55	55	55	66.3	66.3	66.3	132.38	0	323.31	31221000000	56	552	557520000	0.525929	0.705536	0.301779	1.09809	F4I366	F4I366	DNA-directed RNA polymerase	NRPA2	322	sp|F4I366|NRPA2_ARATH DNA-directed RNA polymerase I subunit 2 OS=Arabidopsis thaliana OX=3702 GN=NRPA2 PE=2 SV=1	AT1G29940
25.0388	NaN	NaN	25.9673	25.734	25.8659	25.6999	25.7234	25.7375	25.8028	26.4805	25.2718							17	17	17	37	37	37	70.541	0	110.42	5979200000	36	78	166090000	0.305085	1	-0.182419	-0.714298	F4I3C3	F4I3C3		NQR	324	tr|F4I3C3|F4I3C3_ARATH ARP protein (REF) OS=Arabidopsis thaliana OX=3702 GN=NQR PE=1 SV=1	AT1G49670
23.987	NaN	NaN	28.7357	27.7046	27.503	NaN	27.7581	27.8217	27.6956	25.6768	24.9499					+	AP1_WT_ELUATE_AP1_WT_INPUT	25	25	25	52.8	52.8	52.8	85.586	0	323.31	25663000000	36	267	712850000	3.77038	0.00146053	-2.99854	-7.25174	F4I3P9	F4I3P9		MURE	325	sp|F4I3P9|MURE_ARATH UDP-N-acetylmuramoyl-L-alanyl-D-glutamate--2,6-diaminopimelate ligase MurE homolog, chloroplastic OS=Arabidopsis thaliana OX=3702 GN=MURE PE=1 SV=1	AT1G63680
NaN	NaN	NaN	25.6407	25.3303	25.4072	25.256	25.4885	24.7681	25.2901	25.7421	25.4485							19	19	19	26.4	26.4	26.4	142.11	0	161.1	4728800000	58	71	81531000	0.348721	1	0.161353	0.803694	F4I420;F4I421;Q9SRE1;C0SUW8	F4I420		At1g76810	326	tr|F4I420|F4I420_ARATH Eukaryotic translation initiation factor 5B OS=Arabidopsis thaliana OX=3702 GN=At1g76810 PE=1 SV=1	AT1G76810
NaN	NaN	NaN	28.1732	28.1496	27.888	NaN	28.4508	28.1808	28.2338	28.2315	28.5007							13	13	13	24.2	24.2	24.2	91.151	0	65.56	13996000000	36	65	388770000	0.592531	0.616014	0.186733	1.25678	F4I448	F4I448		PRP39	327	tr|F4I448|F4I448_ARATH Tetratricopeptide repeat (TPR)-like superfamily protein OS=Arabidopsis thaliana OX=3702 GN=PRP39 PE=1 SV=1	AT1G04080
25.4223	25.924	27.2189	24.104	24.3836	24.954	27.0644	24.483	24.5616	25.1704	24.8163	26.6245					+	AP1_WT_ELUATE_AP1_WT_INPUT	27	27	27	23.4	23.4	23.4	180.09	0	154.09	4743900000	63	97	75300000	2.4056	0.0179463	1.56896	3.72695	F4I4P3	F4I4P3	Mediator of RNA polymerase II transcription subunit 23	MED23	330	sp|F4I4P3|MED23_ARATH Mediator of RNA polymerase II transcription subunit 23 OS=Arabidopsis thaliana OX=3702 GN=MED23 PE=1 SV=1	AT1G23230
28.1997	27.945	28.7911	27.4819	27.1826	26.9126	28.1021	26.9987	26.8616	26.8264	28.6838	28.0066					+	AP1_WT_ELUATE_AP1_WT_INPUT	13	13	13	40.9	40.9	40.9	35.759	0	118.21	15418000000	15	213	1027800000	4.40658	0.000504224	1.24409	6.95544	F4I4Q1	F4I4Q1		At1g23280	331	tr|F4I4Q1|F4I4Q1_ARATH Protein MAK16 homolog OS=Arabidopsis thaliana OX=3702 GN=At1g23280 PE=1 SV=1	AT1G23280
25.9093	26.2692	25.9792	21.8559	21.9288	21.105	25.5835	22.4463	22.2448	23.0643	25.1133	25.8074					+	AP1_WT_ELUATE_AP1_WT_INPUT	18	18	18	31.5	31.5	31.5	107.02	0	42.725	1745000000	54	59	32314000	6.44648	2.27742e-05	3.66949	11.7441	F4I5S3	F4I5S3		CTF18	337	tr|F4I5S3|F4I5S3_ARATH p-loop containing nucleoside triphosphate hydrolases superfamily protein OS=Arabidopsis thaliana OX=3702 GN=CTF18 PE=1 SV=1	AT1G04730
25.6914	25.5312	NaN	21.5154	24.7403	24.9788	25.2883	25.124	25.1789	25.4172	26.3673	25.6517							7	7	7	20.9	20.9	20.9	58.347	0	38.129	3107600000	19	43	163560000	0.956988	0.298032	1.21357	1.77055	F4I5U6;O22699	F4I5U6		At1g10640	338	tr|F4I5U6|F4I5U6_ARATH Pectin lyase-like superfamily protein OS=Arabidopsis thaliana OX=3702 GN=At1g10640 PE=1 SV=1	AT1G10640
25.1731	24.7009	NaN	21.2453	24.5315	23.5813	25.2168	22.6689	24.4641	24.8806	24.4826	24.17							17	17	17	14.9	14.9	14.9	207.06	0	44.796	1719900000	95	51	18105000	0.989217	0.279051	1.1867	1.81747	F4I7J9	F4I7J9		At1g17450	350	tr|F4I7J9|F4I7J9_ARATH B-block binding subunit of TFIIIC OS=Arabidopsis thaliana OX=3702 GN=At1g17450 PE=1 SV=1	AT1G17450
NaN	NaN	NaN	27.3076	27.7433	27.5889	24.992	26.8938	26.6506	27.3543	25.3814	25.3792					+	AP1_WT_ELUATE_AP1_WT_INPUT	13	12	9	31.2	28.2	22.3	60.577	0	54.347	12818000000	25	84	512710000	3.92158	0.00113355	-2.00551	-7.66361	F4I7X1	F4I7X1		SKS6	352	tr|F4I7X1|F4I7X1_ARATH SKU5-similar 6 OS=Arabidopsis thaliana OX=3702 GN=SKS6 PE=1 SV=1	AT1G41830
28.6139	27.5966	25.8798	28.3965	27.9387	27.9857	27.4788	28.3145	28.3859	28.3475	28.6527	28.5154							79	79	79	40.7	40.7	40.7	294.07	0	323.31	30923000000	146	651	211800000	0.458482	0.810579	-0.438579	-0.984797	F4I893	F4I893		ILA	353	sp|F4I893|ILA_ARATH Protein ILITYHIA OS=Arabidopsis thaliana OX=3702 GN=ILA PE=1 SV=1	AT1G64790
24.0477	NaN	NaN	27.3828	27.1487	26.8967	25.2021	27.4349	27.4227	27.3183	25.4788	25.6234					+	AP1_WT_ELUATE_AP1_WT_INPUT	4	4	4	32.7	32.7	32.7	22.438	0	75.572	13967000000	4	83	3491800000	4.03826	0.000903169	-2.17934	-7.20984	F4I9J7	F4I9J7		Y14	361	sp|F4I9J7|Y14_ARATH RNA-binding protein Y14 OS=Arabidopsis thaliana OX=3702 GN=Y14 PE=1 SV=1	AT1G51510
NaN	NaN	NaN	24.8968	24.6653	24.5094	24.2313	25.067	24.9772	24.5273	25.7767	25.023							13	13	13	29.4	29.4	29.4	70.935	0	86.161	2711800000	36	47	75328000	0.309333	1	0.236478	0.727497	F4I9M9	F4I9M9		At1g51720	362	tr|F4I9M9|F4I9M9_ARATH Amino acid dehydrogenase family protein OS=Arabidopsis thaliana OX=3702 GN=At1g51720 PE=1 SV=1	AT1G51720
NaN	NaN	NaN	23.7282	22.3279	21.5177	25.2534	23.0692	21.2798	23.3448	NaN	24.669							9	9	9	24.2	24.2	24.2	66.001	0	169.64	1875300000	25	54	75011000	1.72107	0.0669022	2.41657	3.18283	F4I9P7	F4I9P7		At1g58025	363	tr|F4I9P7|F4I9P7_ARATH DNA-binding bromodomain-containing protein OS=Arabidopsis thaliana OX=3702 GN=At1g58025 PE=1 SV=1	AT1G58025
27.3845	27.061	NaN	26.1173	25.5036	25.2069	27.1057	25.8221	25.1773	25.8691	26.4167	26.7114					+	AP1_WT_ELUATE_AP1_WT_INPUT	31	31	31	40.2	40.2	40.2	133.78	0	92.175	6402000000	55	165	116400000	3.55511	0.0021736	1.31978	5.74358	F4IAE9	F4IAE9	ATPase family AAA domain-containing protein At1g05910		367	sp|F4IAE9|Y1591_ARATH ATPase family AAA domain-containing protein At1g05910 OS=Arabidopsis thaliana OX=3702 GN=At1g05910 PE=2 SV=1	AT1G05910
26.8169	26.9998	27.4553	27.6836	27.1602	27.5985	26.1441	26.9825	26.5289	27.0842	25.5067	26.7662							40	40	40	28.5	28.5	28.5	207.07	0	323.31	19505000000	91	248	214340000	0.914567	0.325468	-0.558147	-1.69087	F4IAT2	F4IAT2	THO complex subunit 2	THO2	373	sp|F4IAT2|THOC2_ARATH THO complex subunit 2 OS=Arabidopsis thaliana OX=3702 GN=THO2 PE=1 SV=1	AT1G24706
NaN	26.166	23.1746	25.3431	25.4558	26.0375	24.5614	25.5819	25.5345	26.3116	26.3315	26.3049							22	22	17	39.2	39.2	31.9	88.371	0	123.09	11783000000	42	159	280560000	0.289753	1	-0.403009	-0.680763	F4IC79	F4IC79		At1g12380	376	tr|F4IC79|F4IC79_ARATH Uncharacterized protein OS=Arabidopsis thaliana OX=3702 GN=At1g12380 PE=1 SV=1	AT1G12380
27.3498	26.083	25.7045	27.4514	27.0337	26.9664	26.8415	27.06	26.2542	27.2635	27.675	26.3972							35	35	35	42.4	42.4	42.4	117.02	0	323.31	18619000000	42	295	443300000	0.432764	0.85314	-0.32971	-0.940389	F4IDC2	F4IDC2		EDA25	382	tr|F4IDC2|F4IDC2_ARATH CCAAT-binding factor OS=Arabidopsis thaliana OX=3702 GN=EDA25 PE=1 SV=1	AT1G72440
27.0017	26.3998	NaN	26.0871	26.1311	26.0694	26.6439	26.1212	25.6655	26.3536	24.6896	26.2418							21	21	21	36.3	36.3	36.3	94.889	0	112.14	8088900000	43	193	188110000	0.126675	1	0.124057	0.332662	F4IDJ0	F4IDJ0		At1g79150	384	tr|F4IDJ0|F4IDJ0_ARATH Binding protein OS=Arabidopsis thaliana OX=3702 GN=YUP8H12R.24 PE=1 SV=1	AT1G79150
NaN	NaN	NaN	26.6115	25.6796	25.498	NaN	26.2848	25.9549	26.5203	26.7171	24.6061							34	34	30	31.3	31.3	27.9	174.51	0	323.31	9358800000	78	154	119980000	0.299403	1	-0.429918	-0.714292	F4IDQ6	F4IDQ6		NIH	385	sp|F4IDQ6|NIH_ARATH DExH-box ATP-dependent RNA helicase DExH2 OS=Arabidopsis thaliana OX=3702 GN=NIH PE=1 SV=1	AT1G06670
25.9077	25.9856	NaN	25.3688	25.3842	25.2591	NaN	22.7797	25.8849	22.9303	26.4017	26.6061							17	17	17	22.8	22.8	22.8	112.32	0	63.45	4680400000	52	53	90009000	1.28461	0.158195	1.62413	2.28178	F4IDS7;Q8S905	F4IDS7		At1g12470	386	sp|F4IDS7|VPS18_ARATH Vacuolar sorting protein 18 OS=Arabidopsis thaliana OX=3702 GN=VPS18 PE=1 SV=1	AT1G12470
NaN	NaN	NaN	26.2404	26.2363	26.2172	NaN	26.365	26.453	25.727	24.8706	24.6317					+	AP1_WT_ELUATE_AP1_WT_INPUT	8	8	6	14.5	14.5	8.7	52.152	0	17.662	5257400000	16	52	328590000	3.51042	0.00233653	-1.45532	-7.41759	F4IDU4	F4IDU4	Lysophospholipid acyltransferase 1	LPLAT1	387	sp|F4IDU4|MBOA1_ARATH Lysophospholipid acyltransferase 1 OS=Arabidopsis thaliana OX=3702 GN=LPCAT1 PE=1 SV=1	AT1G12640
25.8607	NaN	NaN	24.3907	24.4973	21.5248	26.3459	21.6343	24.4698	24.5277	25.1557	25.2894							16	16	16	32.8	32.8	32.8	80.514	0	24.849	1640100000	43	46	38143000	1.58004	0.087709	2.15552	2.71874	F4IE66	F4IE66		At1g26370	391	sp|F4IE66|PRP22_ARATH Pre-mRNA-splicing factor ATP-dependent RNA helicase DEAH10 OS=Arabidopsis thaliana OX=3702 GN=RID1 PE=1 SV=1	AT1G26370
30.9791	31.066	30.9093	27.7155	27.1323	27.7619	31.4528	27.8764	27.5731	27.9953	30.0303	31.0531					+	AP1_WT_ELUATE_AP1_WT_INPUT	76	76	76	67.4	67.4	67.4	143.62	0	323.31	45585000000	75	710	607800000	7.20954	9.04872e-06	3.23933	14.1365	F4IF36	F4IF36		EMB1135	393	sp|F4IF36|FGT1_ARATH Protein FORGETTER 1 OS=Arabidopsis thaliana OX=3702 GN=FGT1 PE=1 SV=1	AT1G79350
25.5545	24.7989	NaN	24.8974	24.8891	25.0237	25.7463	26.0728	25.5474	26.1653	25.8238	25.4819							11	11	11	24.3	24.3	24.3	74.784	0	104.18	3906600000	36	57	108520000	0.055783	1	0.0484545	0.156019	F4IFC5	F4IFC5		EMB2761	394	sp|F4IFC5|SYTM2_ARATH Threonine--tRNA ligase, chloroplastic/mitochondrial 2 OS=Arabidopsis thaliana OX=3702 GN=EMB2761 PE=2 SV=1	AT2G04842
26.1424	NaN	25.425	27.7369	27.4299	27.2178	NaN	27.0319	26.9977	27.2705	NaN	24.0812					+	AP1_WT_ELUATE_AP1_WT_INPUT	27	27	27	45.7	45.7	45.7	75.508	0	323.31	17892000000	35	221	511190000	2.71759	0.0098898	-2.06462	-4.82244	F4IFD0	F4IFD0		At2g04865	395	sp|F4IFD0|MAIL2_ARATH Protein MAIN-LIKE 2 OS=Arabidopsis thaliana OX=3702 GN=At2g04865 PE=1 SV=1	AT2G04865
23.7609	25.2922	NaN	28.6966	28.126	28.4629	27.4952	28.443	28.6616	29.1483	27.0785	26.5577					+	AP1_WT_ELUATE_AP1_WT_INPUT	50	50	50	45.4	45.4	45.4	144.6	0	323.31	44205000000	73	428	605540000	2.53361	0.0141023	-2.55283	-4.04042	F4IGA5	F4IGA5	Nuclear pore complex protein NUP133	NUP133	399	sp|F4IGA5|NU133_ARATH Nuclear pore complex protein NUP133 OS=Arabidopsis thaliana OX=3702 GN=NUP133 PE=1 SV=1	AT2G05120
29.9724	29.8679	30.8625	29.0508	28.5693	28.439	29.8611	28.6932	28.3761	28.7745	30.0849	29.5541					+	AP1_WT_ELUATE_AP1_WT_INPUT	43	43	43	67.2	67.2	67.2	85.382	0	323.31	66570000000	31	679	2147400000	4.26229	0.000640003	1.38329	6.68487	F4IH25	F4IH25	Ribosome biogenesis protein BOP1 homolog	At2g40360	402	sp|F4IH25|BOP1_ARATH Ribosome biogenesis protein BOP1 homolog OS=Arabidopsis thaliana OX=3702 GN=BOP1 PE=1 SV=1	AT2G40360
28.2724	27.1815	26.3852	23.6166	24.3867	25.0953	28.385	24.027	23.0764	24.6493	26.5473	28.4159					+	AP1_WT_ELUATE_AP1_WT_INPUT	58	58	58	21.5	21.5	21.5	389.86	0	323.31	9876700000	141	235	70047000	4.40861	0.000503414	3.38933	6.9593	F4IHS2	F4IHS2	Chromatin structure-remodeling complex protein SYD	SYD	403	sp|F4IHS2|SYD_ARATH Chromatin structure-remodeling complex protein SYD OS=Arabidopsis thaliana OX=3702 GN=SYD PE=1 SV=1	AT2G28290
28.782	28.4215	28.1011	25.5757	25.4027	25.2045	28.9108	25.4173	24.4112	25.6456	27.5257	28.1673					+	AP1_WT_ELUATE_AP1_WT_INPUT	38	38	38	42	42	42	141.79	0	252.37	10031000000	64	297	156730000	6.18438	3.65582e-05	3.04192	11.0093	F4IHU8;REV__CON__REFSEQ:XP_585019	F4IHU8		At2g34357	404	tr|F4IHU8|F4IHU8_ARATH ARM repeat superfamily protein OS=Arabidopsis thaliana OX=3702 GN=At2g34357 PE=1 SV=1	AT2G34357
27.6553	27.0915	27.7179	28.0445	27.2881	27.2285	27.4286	27.5156	27.4691	27.3558	27.9027	27.2269							14	14	14	38.9	38.9	38.9	60.895	0	245.24	20874000000	23	195	907580000	0.0408732	1	0.0202138	0.115702	F4IHY7	F4IHY7		PTAC12	405	sp|F4IHY7|PTA12_ARATH Protein PLASTID TRANSCRIPTIONALLY ACTIVE 12, chloroplastic OS=Arabidopsis thaliana OX=3702 GN=PTAC12 PE=1 SV=1	AT2G34640
28.0795	27.4423	NaN	27.5907	27.1375	26.942	27.9481	27.8535	27.4052	27.9419	28.5316	28.1109							64	64	63	45	45	44.7	230.7	0	323.31	18150000000	110	392	165000000	1.31809	0.147747	0.543997	2.28618	F4IIM1	F4IIM1		At2g22125	408	sp|F4IIM1|CSI1_ARATH Protein CELLULOSE SYNTHASE INTERACTIVE 1 OS=Arabidopsis thaliana OX=3702 GN=CSI1 PE=1 SV=1	AT2G22125
26.36	25.1316	NaN	28.2354	27.7653	27.4087	25.7268	27.5113	27.0135	27.9421	26.9966	26.7196					+	AP1_WT_ELUATE_AP1_WT_INPUT	28	28	28	38.4	38.4	38.4	130.34	0	250.5	18836000000	53	245	355400000	2.52651	0.014254	-1.45916	-4.02955	F4IL68	F4IL68		At2g07360	417	tr|F4IL68|F4IL68_ARATH SH3 domain-containing protein OS=Arabidopsis thaliana OX=3702 GN=At2g07360 PE=1 SV=1	AT2G07360
23.2679	NaN	NaN	21.1781	22.4549	24.9277	NaN	24.5431	24.5717	24.5365	23.4846	NaN							12	12	12	22.6	22.6	22.6	68.969	0	323.31	3467200000	21	47	165100000	0.105742	1	-0.325792	-0.286824	F4ILE1	F4ILE1		At2g16940	418	tr|F4ILE1|F4ILE1_ARATH Splicing factor, CC1-like protein OS=Arabidopsis thaliana OX=3702 GN=At2g16940 PE=1 SV=1	AT2G16940
NaN	NaN	NaN	25.8701	25.4572	25.2744	NaN	25.323	24.9903	25.6221	24.7631	24.9169							17	17	17	40.7	40.7	40.7	65.348	0	81.251	5453800000	28	97	194780000	1.35896	0.135771	-0.582835	-2.54548	F4IMH3	F4IMH3		EMB2762	421	sp|F4IMH3|NOC4_ARATH Protein NUCLEOLAR COMPLEX ASSOCIATED 4 OS=Arabidopsis thaliana OX=3702 GN=NOC4 PE=2 SV=1	AT2G17250
24.2644	24.795	NaN	23.9575	24.0589	23.9493	23.9313	24.6932	24.5281	24.6162	NaN	23.961							10	10	7	15.8	15.8	10.3	100.05	0	75.383	1514100000	45	43	33646000	0.0973707	1	-0.0625863	-0.263061	F4IMJ8	F4IMJ8		At2g23520	422	tr|F4IMJ8|F4IMJ8_ARATH Pyridoxal phosphate (PLP)-dependent transferases superfamily protein OS=Arabidopsis thaliana OX=3702 GN=At2g23520 PE=1 SV=1	AT2G23520
25.491	25.2411	NaN	22.5672	21.6213	20.7825	NaN	21.8532	23.1458	22.3523	24.5931	NaN					+	AP1_WT_ELUATE_AP1_WT_INPUT	8	7	7	8.1	7	7	149.64	0	14.587	1103800000	61	15	18095000	3.19994	0.00403255	3.05469	5.8493	F4IN78	F4IN78	HUA2-like protein 3		426	sp|F4IN78|HUAL2_ARATH Protein HUA2-LIKE 2 OS=Arabidopsis thaliana OX=3702 GN=HULK2 PE=2 SV=2	AT2G48160
29.8064	29.8294	29.6462	28.3749	28.0837	27.8886	29.7903	28.2471	28.1145	28.6021	29.0259	29.547					+	AP1_WT_ELUATE_AP1_WT_INPUT	137	137	78	48.5	48.5	32	436.35	0	323.31	37882000000	224	854	169120000	5.22308	0.000145485	1.38905	8.63691	F4IPJ1	F4IPJ1		At2g17930	431	tr|F4IPJ1|F4IPJ1_ARATH Non-specific serine/threonine protein kinase OS=Arabidopsis thaliana OX=3702 GN=At2g17930 PE=1 SV=1	AT2G17930
28.055	27.0567	27.6944	28.5129	27.9245	27.9262	28.1736	28.2029	27.9273	28.2759	27.8501	27.6686							35	35	34	60.6	60.6	59.6	88.011	0	269.45	32985000000	40	368	824630000	1.13689	0.208498	-0.378527	-2.00347	F4IRI1	F4IRI1		At2g18900	435	tr|F4IRI1|F4IRI1_ARATH Transducin/WD40 repeat-like superfamily protein OS=Arabidopsis thaliana OX=3702 GN=At2g18900 PE=1 SV=1	AT2G18900
26.652	24.8562	24.5955	25.6629	25.0628	25.9201	27.2518	25.6244	26.1626	27.0659	26.5992	28.1929							37	37	37	33	33	33	150.91	0	323.31	13402000000	57	233	235120000	0.301131	1	0.441467	0.700006	F4IS91	F4IS91		emb1579	438	sp|F4IS91|RSA1_ARATH Protein SHORT ROOT IN SALT MEDIUM 1 OS=Arabidopsis thaliana OX=3702 GN=RSA1 PE=1 SV=1	AT2G03150
26.1273	26.5721	24.87	23.8665	21.1935	23.2038	26.023	23.7638	23.2419	21.9902	24.3667	25.906					+	AP1_WT_ELUATE_AP1_WT_INPUT	10	6	6	20.9	15.2	15.2	76.495	0	22.778	1308300000	37	26	35358000	3.27455	0.00353616	2.76758	5.00749	F4ISN5	F4ISN5		At2g25760	440	tr|F4ISN5|F4ISN5_ARATH Protein kinase family protein OS=Arabidopsis thaliana OX=3702 GN=At2g25750 PE=1 SV=1	AT2G25760
25.0327	25.1889	NaN	24.1009	24.3042	23.1807	25.1185	24.182	24.0761	22.1641	24.9338	25.0109					+	AP1_WT_ELUATE_AP1_WT_INPUT	9	9	9	19.2	19.2	19.2	78.33	0	27.891	1944000000	40	29	48601000	2.272	0.0232217	1.38898	3.64661	F4IUS3	F4IUS3		At2g32910	447	tr|F4IUS3|F4IUS3_ARATH DCD (Development and Cell Death) domain protein OS=Arabidopsis thaliana OX=3702 GN=At2g32910 PE=1 SV=1	AT2G32910
24.1388	NaN	NaN	21.0184	22.4957	21.9382	NaN	22.7696	22.3762	23.194	NaN	24.2668							10	10	10	7.7	7.7	7.7	197.27	0	15.248	542090000	86	12	6303400	1.83151	0.0540114	1.90411	3.38647	F4IV99	F4IV99	Protein CHROMATIN REMODELING 5	CHR5	453	sp|F4IV99|CHR5_ARATH Protein CHROMATIN REMODELING 5 OS=Arabidopsis thaliana OX=3702 GN=CHR5 PE=1 SV=1	AT2G13370
NaN	24.7592	NaN	23.9201	24.0552	24.5113	NaN	24.657	24.5446	24.2187	25.6066	24.3581							18	18	18	17.9	17.9	17.9	201.21	0	107.43	2060500000	92	52	22397000	1.04969	0.248426	0.59016	1.97229	F4IVJ8	F4IVJ8		At2g26780	456	tr|F4IVJ8|F4IVJ8_ARATH ARM repeat superfamily protein OS=Arabidopsis thaliana OX=3702 GN=At2g26780 PE=1 SV=1	AT2G26780
25.2878	NaN	NaN	25.21	25.1349	25.1055	NaN	25.379	25.4074	25.6013	25.6858	25.197							25	25	25	18.8	18.8	18.8	279.07	0	102.32	3953300000	110	66	35939000	0.225696	1	0.0838114	0.557264	F4IVL6	F4IVL6	DnaJ homolog subfamily C GRV2	GRV2	457	sp|F4IVL6|GRV2_ARATH DnaJ homolog subfamily C GRV2 OS=Arabidopsis thaliana OX=3702 GN=GRV2 PE=1 SV=1	AT2G26890
23.0646	NaN	NaN	28.7597	29.081	28.5993	NaN	28.9693	28.1512	28.5826	25.3597	25.0377					+	AP1_WT_ELUATE_AP1_WT_INPUT	35	35	24	48.1	48.1	34.4	115.16	0	323.31	32871000000	48	316	684810000	4.12578	0.000784487	-4.20318	-8.24992	F4IWV2	F4IWV2		At3g55410	463	tr|F4IWV2|F4IWV2_ARATH Oxoglutarate dehydrogenase (succinyl-transferring) OS=Arabidopsis thaliana OX=3702 GN=At3g55410 PE=1 SV=1	AT3G55410
25.3226	25.2799	NaN	21.8807	22.6485	22.4697	25.6636	22.7055	21.5165	22.1262	25.1149	25.4328					+	AP1_WT_ELUATE_AP1_WT_INPUT	12	12	12	15.9	15.9	15.9	131.33	0	22.186	867300000	53	35	16364000	6.63938	1.84822e-05	3.13823	13.8194	F4IXE7	F4IXE7	Increased DNA methylation 1	IDM1	465	sp|F4IXE7|IDM1_ARATH Increased DNA methylation 1 OS=Arabidopsis thaliana OX=3702 GN=IDM1 PE=1 SV=1	AT3G14980
NaN	NaN	NaN	27.8607	28.2656	28.215	NaN	27.7764	27.7621	27.8206	27.5355	25.1188							53	53	53	41	41	41	192.88	0	323.31	20683000000	102	358	202770000	1.46625	0.109628	-1.6229	-2.73016	F4IXW2	F4IXW2	Brefeldin A-inhibited guanine nucleotide-exchange protein 5	BIG5	468	sp|F4IXW2|BIG5_ARATH Brefeldin A-inhibited guanine nucleotide-exchange protein 5 OS=Arabidopsis thaliana OX=3702 GN=BIG5 PE=1 SV=2	AT3G43300
NaN	NaN	NaN	25.9488	26.9495	26.6667	NaN	27.2322	26.4349	27.1087	26.2068	25.151							22	22	9	35.1	35.1	13.8	96.353	0	301.04	9560300000	39	236	245140000	1.27437	0.161266	-1.04455	-2.40179	F4IYK3	F4IYK3		At3g08943	472	tr|F4IYK3|F4IYK3_ARATH ARM repeat superfamily protein OS=Arabidopsis thaliana OX=3702 GN=At3g08943 PE=1 SV=2	AT3G08943
25.2768	23.9039	NaN	22.7219	21.8457	22.5601	25.5461	22.2096	22.8105	23.171	24.5861	25.6151					+	AP1_WT_ELUATE_AP1_WT_INPUT	10	10	9	9.7	9.7	8.5	149.32	0	39.7	980280000	64	51	15317000	4.06074	0.000876593	2.43244	6.71592	F4IZM8	F4IZM8	HUA2-like protein 2		475	sp|F4IZM8|HUAL3_ARATH Protein HUA2-LIKE 3 OS=Arabidopsis thaliana OX=3702 GN=HULK3 PE=2 SV=1	AT3G63070
NaN	25.4492	NaN	25.1879	27.2805	25.1393	25.9514	27.0404	26.1256	25.8598	NaN	24.3909							13	13	13	28.6	28.6	28.6	55.501	0	185.1	4380100000	29	45	151040000	0.665767	0.532359	-0.841742	-1.36038	F4J0F0	F4J0F0		At3g28830	479	tr|F4J0F0|F4J0F0_ARATH Mucin-like protein, putative (DUF1216) OS=Arabidopsis thaliana OX=3702 GN=At3g28830 PE=1 SV=1	AT3G28830
25.4305	25.5896	NaN	28.262	28.0264	27.5002	25.3548	28.0504	27.4959	28.2535	25.5623	26.5183					+	AP1_WT_ELUATE_AP1_WT_INPUT	37	37	37	37.4	37.4	37.4	176.3	0	323.31	19259000000	79	259	243790000	5.08853	0.000178069	-2.2403	-9.05051	F4J0P2	F4J0P2		At3g50590	480	tr|F4J0P2|F4J0P2_ARATH Transducin/WD40 repeat-like superfamily protein OS=Arabidopsis thaliana OX=3702 GN=At3g50590 PE=1 SV=1	AT3G50590
26.6854	26.5799	NaN	27.6603	27.1499	27.3939	26.2864	27.3314	27.384	27.4061	26.6551	26.4541					+	AP1_WT_ELUATE_AP1_WT_INPUT	20	20	20	33.5	33.5	33.5	77.674	0	239.93	15400000000	29	144	531020000	4.91539	0.000231532	-0.855409	-8.61854	F4J381	F4J381		At3g51050	489	tr|F4J381|F4J381_ARATH FG-GAP repeat-containing protein OS=Arabidopsis thaliana OX=3702 GN=At3g51050 PE=1 SV=1	AT3G51050
27.9955	27.0375	27.8724	29.3208	28.1466	28.2096	28.1325	28.6278	28.4661	28.6517	27.8253	27.6792					+	AP1_WT_ELUATE_AP1_WT_INPUT	31	31	31	46.9	46.9	46.9	102.92	0	323.31	40530000000	42	579	965000000	2.23193	0.0249998	-0.813362	-3.48598	F4J3M2	F4J3M2		PTAC3	490	tr|F4J3M2|F4J3M2_ARATH Plastid transcriptionally active 3 OS=Arabidopsis thaliana OX=3702 GN=PTAC3 PE=1 SV=1	AT3G04260
25.8287	25.9636	NaN	27.1856	26.5793	26.3832	25.3071	26.8881	26.6983	26.6355	26.41	25.9425					+	AP1_WT_ELUATE_AP1_WT_INPUT	27	27	27	24.4	24.4	24.4	152.26	0	85.138	10200000000	67	126	152240000	2.59566	0.0125716	-0.837942	-4.13589	F4J3N2	F4J3N2		emb2458	491	sp|F4J3N2|FTSI5_ARATH Probable inactive ATP-dependent zinc metalloprotease FTSHI 5, chloroplastic OS=Arabidopsis thaliana OX=3702 GN=FTSHI5 PE=2 SV=1	AT3G04340
NaN	NaN	NaN	25.0375	25.3661	24.9223	NaN	25.028	24.7168	25.5676	24.1853	24.364					+	AP1_WT_ELUATE_AP1_WT_INPUT	6	6	6	15.6	15.6	15.6	67.028	0	18.853	2760200000	25	32	110410000	1.92061	0.0457113	-0.831695	-3.55456	F4J4K6	F4J4K6		At3g57890	494	tr|F4J4K6|F4J4K6_ARATH TBCC domain-containing protein 1 OS=Arabidopsis thaliana OX=3702 GN=At3g57890 PE=1 SV=1	AT3G57890
27.3173	27.2986	27.1874	26.0759	25.219	25.051	26.2607	25.4409	22.735	24.888	NaN	25.8312					+	AP1_WT_ELUATE_AP1_WT_INPUT	21	21	21	39.8	39.8	39.8	74.959	0	131.73	5969900000	29	107	205860000	1.97431	0.0409528	1.8774	3.2129	F4J5D3	F4J5D3		At3g24080	496	tr|F4J5D3|F4J5D3_ARATH KRR1 family protein OS=Arabidopsis thaliana OX=3702 GN=At3g24080 PE=1 SV=1	AT3G24080
24.8731	NaN	NaN	24.6752	24.7778	24.3646	NaN	24.5689	24.5561	24.3926	25.1057	NaN							14	14	13	28	28	26.7	87.639	0	30.626	2446300000	43	42	56891000	1.79295	0.0582621	0.433534	3.3148	F4J5I0	F4J5I0		At3g45190	497	tr|F4J5I0|F4J5I0_ARATH SIT4 phosphatase-associated family protein OS=Arabidopsis thaliana OX=3702 GN=At3g45190 PE=1 SV=1	AT3G45190
26.8224	26.9104	23.1565	23.1686	25.3995	21.4745	26.8855	25.1134	24.2488	25.4124	25.9929	26.5941							19	19	16	31.8	31.8	28.9	77.472	0	69.154	3544400000	41	83	86448000	1.28133	0.15928	1.92412	2.20136	F4J5R1	F4J5R1		At3g52100	498	tr|F4J5R1|F4J5R1_ARATH RING/FYVE/PHD-type zinc finger family protein OS=Arabidopsis thaliana OX=3702 GN=At3g52100 PE=1 SV=1	AT3G52100
NaN	NaN	NaN	27.6684	27.5118	27.3244	NaN	27.5941	27.072	27.1954	26.9387	25.9261							40	40	40	42.6	42.6	42.6	153.69	0	323.31	15372000000	63	238	244000000	1.75638	0.0623057	-0.962021	-3.2474	F4J5S1	F4J5S1	Clustered mitochondria protein	FMT	499	sp|F4J5S1|CLU_ARATH Clustered mitochondria protein OS=Arabidopsis thaliana OX=3702 GN=FMT PE=2 SV=1	AT3G52140
NaN	NaN	NaN	26.2508	26.0368	26.4258	26.0821	26.8592	26.5504	26.5215	26.2158	NaN							11	11	9	52.3	52.3	45.8	35.663	0	37.643	8898200000	21	97	423720000	0.664097	0.534096	-0.291753	-1.38028	F4J6A1	F4J6A1	Eukaryotic translation initiation factor 3 subunit G	EIF3G1	501	tr|F4J6A1|F4J6A1_ARATH Eukaryotic translation initiation factor 3 subunit G OS=Arabidopsis thaliana OX=3702 GN=EIF3G1 PE=1 SV=1	AT3G11400
27.3625	25.5372	23.8085	21.9492	22.7863	21.7119	26.7546	21.0672	22.5052	22.8838	25.6769	26.356				MYB	+	AP1_WT_ELUATE_AP1_WT_INPUT	25	25	25	24.8	24.8	24.8	181.75	0	86.505	2601500000	81	90	32117000	4.15466	0.000752825	3.76537	6.4877	F4J6V1	F4J6V1		At3g52250	504	tr|F4J6V1|F4J6V1_ARATH Duplicated homeodomain-like superfamily protein OS=Arabidopsis thaliana OX=3702 GN=At3g52250 PE=1 SV=1	AT3G52250
NaN	NaN	NaN	24.506	24.2381	23.687	NaN	24.1704	24.1966	24.5541	24.1358	24.5652							15	15	14	21.7	21.7	20.5	117.77	0	54.88	2147800000	45	50	47729000	0.195422	1	0.125098	0.495839	F4J738	F4J738	Importin beta-like SAD2 homolog		505	sp|F4J738|SAD2H_ARATH Importin beta-like SAD2 homolog OS=Arabidopsis thaliana OX=3702 GN=At3g59020 PE=1 SV=1	AT3G59020
24.8396	NaN	NaN	29.6155	28.9906	28.658	24.3149	28.3836	28.1521	28.5788	27.3428	25.9616					+	AP1_WT_ELUATE_AP1_WT_INPUT	46	46	46	48.5	48.5	48.5	130.91	0	323.31	32534000000	63	413	516410000	3.11719	0.00470673	-3.11506	-5.26109	F4J8D3	F4J8D3	Protein TPLATE	TPLATE	509	sp|F4J8D3|TPLAT_ARATH Protein TPLATE OS=Arabidopsis thaliana OX=3702 GN=TPLATE PE=1 SV=1	AT3G01780
29.1448	27.7727	28.6003	25.5348	24.5785	25.5045	28.5822	24.0948	25.5311	25.8773	28.124	28.6795					+	AP1_WT_ELUATE_AP1_WT_INPUT	49	49	49	35	35	35	234.22	0	323.31	9962700000	88	284	113210000	5.65096	7.3733e-05	3.29711	9.63445	F4J8G7	F4J8G7		EMB2016	510	sp|F4J8G7|VIR_ARATH Protein virilizer homolog OS=Arabidopsis thaliana OX=3702 GN=VIR PE=1 SV=1	AT3G05680
30.1353	29.9679	30.2416	29.1632	29.0366	28.6704	30.3125	28.9075	28.2703	28.9355	30.2247	29.9581					+	AP1_WT_ELUATE_AP1_WT_INPUT	75	75	75	51.9	51.9	51.9	214.23	0	323.31	68388000000	101	882	677110000	5.43148	0.000102117	1.30945	9.11182	F4J8K6	F4J8K6		At3g11964	511	sp|F4J8K6|RRP5_ARATH rRNA biogenesis protein RRP5 OS=Arabidopsis thaliana OX=3702 GN=RRP5 PE=2 SV=2	AT3G11964
23.9553	NaN	NaN	23.6483	23.5686	23.5469	NaN	23.8133	23.8476	23.7116	25.2583	NaN							5	5	5	34.9	34.9	34.9	16.642	0	11.703	1484300000	8	23	185540000	1.54026	0.0946175	0.917416	2.85943	F4J9E4	F4J9E4		At3g59650	517	tr|F4J9E4|F4J9E4_ARATH Mitochondrial ribosomal protein L51/S25/CI-B8 family protein OS=Arabidopsis thaliana OX=3702 GN=At3g59650 PE=1 SV=1	AT3G59650
30.0912	30.2632	29.5044	27.2127	26.9853	27.0494	30.2389	27.553	27.2352	27.8344	28.78	29.9262					+	AP1_WT_ELUATE_AP1_WT_INPUT	59	59	48	54.6	54.6	45.2	126.73	0	323.31	27002000000	54	560	500030000	5.50314	9.33383e-05	2.48897	9.27987	F4J9M5	F4J9M5	Probable ATP-dependent DNA helicase CHR12	CHR12	519	sp|F4J9M5|CHR12_ARATH Probable ATP-dependent DNA helicase CHR12 OS=Arabidopsis thaliana OX=3702 GN=CHR12 PE=2 SV=1	AT3G06010
NaN	NaN	NaN	22.7604	23.2175	23.2134	NaN	23.6223	23.3098	23.9563	23.5844	23.7476							8	8	8	14.6	14.6	14.6	99.777	0	16.839	1026200000	52	35	19735000	0.473281	0.786688	0.319345	1.04498	F4JC31	F4JC31		At3g06670	529	tr|F4JC31|F4JC31_ARATH Binding protein OS=Arabidopsis thaliana OX=3702 GN=At3g06670 PE=1 SV=1	AT3G06670
27.9355	24.6495	25.8215	29.2507	28.2868	28.2968	27.7514	28.8056	28.876	28.8848	28.0952	27.8501							32	32	32	51.8	51.8	51.8	78.813	0	323.31	42801000000	30	450	1426700000	1.75345	0.0626739	-1.71625	-2.8369	F4JF21	F4JF21		PDE312	542	sp|F4JF21|PTA10_ARATH Protein PLASTID TRANSCRIPTIONALLY ACTIVE 10 OS=Arabidopsis thaliana OX=3702 GN=PTAC10 PE=1 SV=1	AT3G48500
NaN	25.0454	NaN	27.2135	28.0484	27.3228	26.5474	27.6546	27.1485	27.173	27.0073	26.9859							30	24	24	48.6	42.2	42.2	90.566	0	323.31	16670000000	47	194	354670000	1.44715	0.113878	-1.03029	-2.52168	F4JFN3	F4JFN3		Hsp89.1	544	sp|F4JFN3|HS906_ARATH Heat shock protein 90-6, mitochondrial OS=Arabidopsis thaliana OX=3702 GN=HSP90-6 PE=1 SV=1	AT3G07770
NaN	NaN	25.6436	24.7933	24.5687	24.5533	25.4471	25.6288	24.8512	25.3756	NaN	25.3548							16	16	16	19.7	19.7	19.7	138.19	0	52.923	3679600000	56	58	65707000	1.0195	0.263335	0.520039	1.9251	F4JGZ1	F4JGZ1	Mediator of RNA polymerase II transcription subunit 16	MED16	549	sp|F4JGZ1|MED16_ARATH Mediator of RNA polymerase II transcription subunit 16 OS=Arabidopsis thaliana OX=3702 GN=MED16 PE=1 SV=1	AT4G04920
26.0022	26.3496	NaN	26.366	25.8475	25.8587	25.837	26.2544	26.0366	26.4231	26.8688	26.377							22	22	22	44.3	44.3	44.3	88.37	0	65.372	6853700000	43	96	159390000	0.347347	1	0.155839	0.790756	F4JHH5	F4JHH5	Exocyst complex component SEC15B	SEC15B	551	sp|F4JHH5|SC15B_ARATH Exocyst complex component SEC15B OS=Arabidopsis thaliana OX=3702 GN=SEC15B PE=1 SV=1	AT4G02350
NaN	24.6209	NaN	21.7225	21.1111	23.0128	NaN	22.0623	22.1357	22.7669	NaN	24.3456					+	AP1_WT_ELUATE_AP1_WT_INPUT	5	5	5	15.7	15.7	15.7	59.995	0	9.4753	370500000	22	8	16841000	2.39485	0.0183163	2.34807	4.51744	F4JHN2	F4JHN2		iqd17	554	sp|F4JHN2|IQD17_ARATH Protein IQ-DOMAIN 17 OS=Arabidopsis thaliana OX=3702 GN=IQD17 PE=1 SV=1	AT4G00820
24.6676	24.447	NaN	24.432	23.906	24.0839	NaN	24.4339	24.1897	24.5845	25.0511	NaN							14	14	14	18.9	18.9	18.9	119.4	0	162.84	2016200000	52	43	38774000	1.29378	0.155228	0.450216	2.35328	F4JHZ4	F4JHZ4			556	tr|F4JHZ4|F4JHZ4_ARATH Glycosyl transferase family 1 protein OS=Arabidopsis thaliana OX=3702 GN=At4g01210 PE=1 SV=1	AT4G01210
25.0426	NaN	NaN	25.7727	25.853	25.9418	NaN	25.8283	26.2896	25.6546	25.336	25.6287							14	13	13	26.6	24.1	24.1	74.824	0	27.329	5487200000	31	63	177010000	1.84897	0.05202	-0.554216	-3.24478	F4JIN3	F4JIN3	DnaJ protein ERDJ2B	ERDJ2B	559	sp|F4JIN3|DNJ29_ARATH DnaJ protein ERDJ2B OS=Arabidopsis thaliana OX=3702 GN=ERDJ2B PE=1 SV=1	AT4G21180
27.0531	27.5013	27.7358	26.9705	26.4167	26.9657	25.7861	26.1121	26.318	26.5641	25.937	26.8386							31	31	28	56.8	56.8	50.7	86.643	0	297.91	14695000000	35	226	419860000	0.302697	1	0.250803	0.703018	F4JJC1	F4JJC1		At4g15020	561	tr|F4JJC1|F4JJC1_ARATH HAT transposon superfamily OS=Arabidopsis thaliana OX=3702 GN=At4g15020 PE=1 SV=1	AT4G15020
24.9301	25.5406	25.5866	27.3036	26.9545	26.9237	25.3115	27.2272	26.9832	27.3277	26.573	25.9857					+	AP1_WT_ELUATE_AP1_WT_INPUT	23	23	17	66.2	66.2	57.8	58.906	0	323.31	13043000000	25	172	521720000	3.88215	0.00121387	-1.4654	-6.00532	F4JL11	F4JL11	Importin subunit alpha-2	IMPA2	567	sp|F4JL11|IMPA2_ARATH Importin subunit alpha-2 OS=Arabidopsis thaliana OX=3702 GN=IMPA2 PE=1 SV=1	AT4G16143
NaN	25.112	NaN	28.0664	27.9849	27.6602	25.5341	27.4994	27.0992	27.7197	26.2682	24.3796					+	AP1_WT_ELUATE_AP1_WT_INPUT	34	34	33	44.5	44.5	43.4	135.48	0	323.31	18459000000	58	263	318260000	3.73721	0.00154474	-2.34817	-6.5254	F4JLM5	F4JLM5		At4g10320	570	sp|F4JLM5|SYIC_ARATH Isoleucine--tRNA ligase, cytoplasmic OS=Arabidopsis thaliana OX=3702 GN=At4g10320 PE=2 SV=1	AT4G10320
NaN	24.8147	NaN	27.399	27.1233	27.4805	NaN	27.4507	27.4506	27.3657	26.3157	25.648					+	AP1_WT_ELUATE_AP1_WT_INPUT	21	21	21	41	41	41	92.368	0	167.86	13842000000	39	196	354920000	3.28926	0.00346232	-1.7855	-6.05437	F4JLQ2	F4JLQ2		At4g16180	572	tr|F4JLQ2|F4JLQ2_ARATH Transmembrane protein OS=Arabidopsis thaliana OX=3702 GN=At4g16180 PE=1 SV=1	AT4G16180
NaN	NaN	NaN	27.125	27.8807	27.3942	NaN	27.9634	26.8344	27.4139	25.4933	24.8789					+	AP1_WT_ELUATE_AP1_WT_INPUT	22	22	22	34.7	34.7	34.7	96.724	0	191.45	12512000000	38	134	329270000	3.14946	0.00441514	-2.24917	-6.36019	F4JMJ1	F4JMJ1	Heat shock 70 kDa protein 17	HSP70-17	577	sp|F4JMJ1|HSP7R_ARATH Heat shock 70 kDa protein 17 OS=Arabidopsis thaliana OX=3702 GN=HSP70-17 PE=2 SV=1	AT4G16660
25.19	26.6623	27.2466	29.0455	28.3321	28.2063	NaN	28.0619	28.0818	28.139	26.3189	26.3734					+	AP1_WT_ELUATE_AP1_WT_INPUT	50	50	50	18.8	18.8	18.8	471.22	0	323.31	22891000000	202	214	113320000	3.49776	0.00238799	-1.95284	-5.6394	F4JNE2	F4JNE2		At4g17140	582	tr|F4JNE2|F4JNE2_ARATH Pleckstrin homology (PH) domain-containing protein OS=Arabidopsis thaliana OX=3702 GN=At4g17140 PE=1 SV=1	AT4G17140
25.5636	24.748	NaN	24.9564	24.0513	24.1972	25.7285	24.8228	24.5071	24.6642	25.0047	25.1703					+	AP1_WT_ELUATE_AP1_WT_INPUT	14	14	14	17.9	17.9	17.9	123.48	0	66.609	2773000000	57	52	48649000	1.90863	0.0465665	0.709838	3.11885	F4JNL5	F4JNL5		At4g23540	583	tr|F4JNL5|F4JNL5_ARATH ARM repeat superfamily protein OS=Arabidopsis thaliana OX=3702 GN=At4g23540 PE=1 SV=1	AT4G23540
27.7095	26.2268	27.9724	25.8969	25.2834	26.1236	27.1561	24.5457	24.2636	25.3008	25.483	25.7751							28	28	28	23.9	23.9	23.9	218.07	0	317.22	5442600000	88	146	61848000	1.77448	0.0604315	1.48483	2.86514	F4JP43	F4JP43		G2484-1	584	tr|F4JP43|F4JP43_ARATH G2484-1 protein OS=Arabidopsis thaliana OX=3702 GN=G2484-1 PE=1 SV=1	AT4G17330
24.7729	25.2366	NaN	22.5834	22.0047	21.0307	25.748	23.1736	24.4281	22.7431	25.1443	25.3563					+	AP1_WT_ELUATE_AP1_WT_INPUT	20	20	20	18	18	18	224.59	0	96.145	1305700000	86	61	15182000	3.04601	0.00538663	2.59102	4.85706	F4JPJ1	F4JPJ1		At4g30150	588	tr|F4JPJ1|F4JPJ1_ARATH Urb2/Npa2 family protein OS=Arabidopsis thaliana OX=3702 GN=At4g30150 PE=1 SV=1	AT4G30150
27.9352	27.8419	24.9121	25.8958	25.5879	26.2187	28.0405	26.4643	25.9637	26.4855	26.7993	27.7273							130	71	71	45.1	28.4	28.4	433.59	0	323.31	9695900000	222	337	43675000	1.24363	0.170868	1.10674	2.15	F4JPL2	F4JPL2		At4g36080	590	tr|F4JPL2|F4JPL2_ARATH Non-specific serine/threonine protein kinase OS=Arabidopsis thaliana OX=3702 GN=At4g36080 PE=1 SV=1	AT4G36080
NaN	NaN	NaN	25.1929	24.8994	24.8005	NaN	25.2542	25.0737	25.2454	25.032	24.8241							8	8	8	24.8	24.8	24.8	54.571	0	17.295	2626300000	24	32	109430000	0.446845	0.829581	-0.149624	-0.996683	F4JQ95	F4JQ95	Diacylglycerol kinase 7	DGK7	596	sp|F4JQ95|DGK7_ARATH Diacylglycerol kinase 7 OS=Arabidopsis thaliana OX=3702 GN=DGK7 PE=1 SV=1	AT4G30340
28.0532	27.6716	27.8116	25.3075	25.7471	25.4643	27.0392	22.8423	22.2232	22.9477	27.3386	26.7791					+	AP1_WT_ELUATE_AP1_WT_INPUT	5	2	2	47	27.3	27.3	20.307	0	212.3	3822500000	7	55	546070000	3.25919	0.00364606	3.3602	4.98351	F4JRD3	F4JRD3		At4g12600	601	tr|F4JRD3|F4JRD3_ARATH Ribonucloprotein OS=Arabidopsis thaliana OX=3702 GN=At4g12600 PE=1 SV=1	AT4G12600
NaN	NaN	NaN	29.4709	29.0001	29.2681	NaN	29.4069	29.4165	29.0961	26.2401	25.2922					+	AP1_WT_ELUATE_AP1_WT_INPUT	18	18	15	33	33	33	74.139	0	323.31	40778000000	17	336	2398700000	4.9405	0.000223608	-3.51029	-13.2405	F4JRE0	F4JRE0	Transmembrane 9 superfamily member 12	TMN12	602	sp|F4JRE0|TMN12_ARATH Transmembrane 9 superfamily member 12 OS=Arabidopsis thaliana OX=3702 GN=TMN12 PE=2 SV=1	AT4G12650
NaN	24.5433	NaN	25.0269	25.209	25.2663	NaN	25.3455	25.4918	25.4531	25.0148	25.5779							22	22	22	44.7	44.7	44.7	77.714	0	83.064	6045900000	37	101	163400000	0.539335	0.686805	-0.253438	-1.14758	F4JRJ6	F4JRJ6		At4g18465	603	sp|F4JRJ6|DEAH9_ARATH Probable pre-mRNA-splicing factor ATP-dependent RNA helicase DEAH9 OS=Arabidopsis thaliana OX=3702 GN=At4g18465 PE=3 SV=1	AT4G18465
27.3608	26.7878	25.1812	25.9725	24.9638	26.2213	27.7081	26.2458	26.2467	25.8097	27.1069	27.3972							32	32	32	37	37	37	141.56	0	196.66	7407200000	75	189	98763000	1.4283	0.118454	1.01373	2.40026	F4JRX3	F4JRX3	DNA topoisomerase	At4g31210	607	tr|F4JRX3|F4JRX3_ARATH Omega-protein OS=Arabidopsis thaliana OX=3702 GN=At4g31210 PE=1 SV=1	AT4G31210
27.4192	27.1241	26.4814	26.9741	26.3145	26.2718	27.1492	26.4538	26.1894	26.267	27.0066	27.2535					+	AP1_WT_ELUATE_AP1_WT_INPUT	20	20	20	27.8	27.8	27.8	92.266	0	117.19	11732000000	31	125	378460000	2.41945	0.0174403	0.660542	3.74632	F4JTD2	F4JTD2	Putative rRNA methyltransferase	At4g25730	617	tr|F4JTD2|F4JTD2_ARATH Putative rRNA methyltransferase OS=Arabidopsis thaliana OX=3702 GN=At4g25730 PE=1 SV=1	AT4G25730
NaN	NaN	NaN	25.2873	25.6309	25.7125	NaN	25.1183	25.4417	25.2438	25.8513	24.9546							15	15	15	51.5	51.5	51.5	48.037	0	39.316	4099000000	25	73	163960000	0.00341308	1	-0.00279236	-0.0102268	F4JTK8	F4JTK8	Aminoacylase-1	At4g38220	620	tr|F4JTK8|F4JTK8_ARATH N-acyl-L-amino-acid amidohydrolase OS=Arabidopsis thaliana OX=3702 GN=AQI PE=1 SV=1	AT4G38220
23.3676	NaN	NaN	28.1104	28.7003	28.6975	NaN	28.1874	28.5572	27.6598	24.9133	24.8389					+	AP1_WT_ELUATE_AP1_WT_INPUT	25	25	22	25.1	25.1	22.5	142.68	0	323.31	22722000000	52	236	436970000	4.55553	0.000405045	-3.9455	-9.60814	F4JTN1	F4JTN1		At4g38350	621	tr|F4JTN1|F4JTN1_ARATH Patched family protein OS=Arabidopsis thaliana OX=3702 GN=At4g38350 PE=1 SV=1	AT4G38350
27.4127	25.9606	24.8226	19.5534	21.4322	21.7434	28.1731	21.6235	22.7897	21.7213	26.3037	26.932					+	AP1_WT_ELUATE_AP1_WT_INPUT	47	47	47	28.1	28.1	28.1	306.34	0	145.39	3857800000	138	181	27955000	4.90242	0.000237471	5.12354	7.94416	F4JTS8	F4JTS8		NOV	622	sp|F4JTS8|NOV_ARATH Protein NO VEIN OS=Arabidopsis thaliana OX=3702 GN=NOV PE=1 SV=1	AT4G13750
25.5059	25.8251	25.699	22.1631	22.4343	22.2376	25.7444	21.9647	23.2743	22.3512	25.7272	25.7376					+	AP1_WT_ELUATE_AP1_WT_INPUT	12	12	12	24.6	24.6	24.6	88.348	0	29.599	1259000000	40	68	31475000	8.04726	4.34508e-06	3.30235	17.2691	F4JTW1	F4JTW1		At4g13970	623	tr|F4JTW1|F4JTW1_ARATH Zinc ion binding protein OS=Arabidopsis thaliana OX=3702 GN=At4g13970 PE=1 SV=1	AT4G13970
27.8046	28.5904	26.2822	22.1273	21.9666	22.5499	29.1251	22.05	22.8577	23.1748	26.1284	27.9347					+	AP1_WT_ELUATE_AP1_WT_INPUT	29	29	29	26.5	26.5	26.5	173.43	0	158.97	4483200000	80	144	56040000	5.68649	7.01495e-05	5.18986	9.72133	F4JV27	F4JV27		At4g32620	627	tr|F4JV27|F4JV27_ARATH Enhancer of polycomb-like transcription factor protein OS=Arabidopsis thaliana OX=3702 GN=At4g32620 PE=1 SV=1	AT4G32620
25.8504	25.563	24.9336	21.092	24.1705	21.9545	26.0575	22.4226	21.5927	23.8171	23.4875	25.1726					+	AP1_WT_ELUATE_AP1_WT_INPUT	24	24	24	18.9	18.9	18.9	210.74	0	86.028	1579800000	109	71	14494000	2.76089	0.00912166	2.66919	4.23347	F4JV59	F4JV59		At4g32820	628	sp|F4JV59|CABIN_ARATH Calcineurin-binding protein 1 OS=Arabidopsis thaliana OX=3702 GN=CABIN1 PE=1 SV=1	AT4G32820
NaN	NaN	NaN	28.3661	28.5031	28.3125	NaN	27.7867	27.7365	27.5261	25.3921	25.3817					+	AP1_WT_ELUATE_AP1_WT_INPUT	40	40	40	40.1	40.1	40.1	152.37	0	323.31	19960000000	69	206	289280000	3.92528	0.00112647	-2.65157	-8.80913	F4JVN6	F4JVN6	Tripeptidyl-peptidase 2	TPP2	630	sp|F4JVN6|TPPII_ARATH Tripeptidyl-peptidase 2 OS=Arabidopsis thaliana OX=3702 GN=TPP2 PE=1 SV=1	AT4G20850
26.2941	26.2555	25.4142	24.665	24.3234	24.275	26.7986	24.0668	24.9616	25.5782	25.9025	25.9232					+	AP1_WT_ELUATE_AP1_WT_INPUT	40	40	40	22.6	22.6	22.6	288.99	0	101.59	3899200000	116	121	33613000	3.20633	0.00401035	1.45302	4.90138	F4JVU5;F4IBR2	F4JVU5		At4g27010	631	tr|F4JVU5|F4JVU5_ARATH Ribosome 60S biogenesis amino-terminal protein OS=Arabidopsis thaliana OX=3702 GN=EMB2788 PE=1 SV=2	AT4G27010
25.3784	NaN	NaN	24.9208	24.8994	24.8475	26.48	24.9762	24.976	25.2385	25.1673	26.5366							15	15	15	12.6	12.6	12.6	158.04	0	77.078	4362600000	92	45	47420000	1.84905	0.05202	0.914131	3.12338	F4JW79	F4JW79		KTF1	634	sp|F4JW79|RDM3_ARATH Protein RNA-directed DNA methylation 3 OS=Arabidopsis thaliana OX=3702 GN=RDM3 PE=1 SV=1	AT5G04290
26.3275	26.1485	26.9687	26.5259	26.4976	26.2936	26.1593	21.9786	23.0382	21.8449	26.1146	25.8726							43	3	3	51.4	3.6	3.6	108.8	0	4.1932	8590600000	52	28	165200000	1.12618	0.213412	1.90205	1.98867	F4JWP9	F4JWP9		At5g25230	635	sp|F4JWP9|GFL_ARATH 109 kDa U5 small nuclear ribonucleoprotein component GFL OS=Arabidopsis thaliana OX=3702 GN=GFL PE=2 SV=1	AT5G25230
NaN	NaN	NaN	26.6966	27.346	27.1042	26.612	26.7864	26.3219	26.212	26.2003	25.1161							12	12	12	24.3	24.3	24.3	83.455	0	231.3	8584700000	32	100	268270000	1.04174	0.25229	-0.768347	-1.95988	F4JXC5	F4JXC5	Subtilisin-like protease SBT5.4	SBT5.4	638	sp|F4JXC5|SBT54_ARATH Subtilisin-like protease SBT5.4 OS=Arabidopsis thaliana OX=3702 GN=SBT5.4 PE=1 SV=1	AT5G59810
NaN	NaN	NaN	21.2554	22.8166	22.5815	NaN	20.2162	21.4178	22.448	24.2474	24.5014							6	6	6	23.1	23.1	23.1	47.09	0	26.654	322080000	19	21	16952000	1.86664	0.050387	2.58516	3.45232	F4JXC7	F4JXC7		At5g59830	639	tr|F4JXC7|F4JXC7_ARATH DNA-binding protein OS=Arabidopsis thaliana OX=3702 GN=MMN10.5 PE=1 SV=1	AT5G59830
25.4926	25.472	NaN	29.5231	29.5595	29.7019	25.6679	29.5567	29.9396	29.139	28.0495	27.3399					+	AP1_WT_ELUATE_AP1_WT_INPUT	35	35	35	53.6	53.6	53.6	108.87	0	323.31	54009000000	50	527	1080200000	3.85882	0.00126408	-3.16557	-6.31549	F4JXW9	F4JXW9		At5g11560	643	tr|F4JXW9|F4JXW9_ARATH ER membrane protein complex subunit 1 OS=Arabidopsis thaliana OX=3702 GN=At5g11560 PE=1 SV=1	AT5G11560
31.758	31.72	30.8834	30.1237	29.9498	29.8723	32.0003	29.9494	29.6888	29.9795	30.6272	31.6401					+	AP1_WT_ELUATE_AP1_WT_INPUT	71	70	21	61.5	60.7	22.7	123.89	0	323.31	129850000000	55	1188	2360900000	4.17791	0.000734294	1.51091	6.52996	F4JY24	F4JY24		CHR17	646	sp|F4JY24|CHR17_ARATH ISWI chromatin-remodeling complex ATPase CHR17 OS=Arabidopsis thaliana OX=3702 GN=CHR17 PE=1 SV=1	AT5G18620
24.3755	NaN	NaN	23.4244	20.762	22.9559	NaN	23.2501	21.9041	21.6164	24.5791	24.7538					+	AP1_WT_ELUATE_AP1_WT_INPUT	17	17	17	20.6	20.6	20.6	152.28	0	40.052	1263500000	67	35	18858000	2.02411	0.037201	2.25063	3.54078	F4JY37;Q9C8V1	F4JY37		RUK	647	sp|F4JY37|RUK_ARATH Serine/threonine-protein kinase RUNKEL OS=Arabidopsis thaliana OX=3702 GN=RUK PE=1 SV=1	AT5G18700
25.4365	NaN	23.8391	28.4789	28.6224	28.5453	24.9911	28.3057	28.157	28.1204	26.8719	26.7343					+	AP1_WT_ELUATE_AP1_WT_INPUT	21	21	21	50.8	50.8	50.8	60.182	0	211.6	26478000000	26	234	1018400000	3.3561	0.00306197	-2.79704	-5.38698	F4JY76	F4JY76	Eukaryotic translation initiation factor 3 subunit L		648	tr|F4JY76|F4JY76_ARATH Eukaryotic translation initiation factor 3 subunit L OS=Arabidopsis thaliana OX=3702 GN=At5g25754 PE=1 SV=1	AT5G25754
25.915	25.7286	NaN	26.3458	26.4189	26.428	26.392	26.6549	26.5939	26.316	26.2923	26.2171							16	16	16	28.7	28.7	28.7	90.931	0	57.508	8404100000	41	117	204980000	1.64539	0.0775548	-0.350584	-2.74595	F4JYC1	F4JYC1		At5g35180	649	tr|F4JYC1|F4JYC1_ARATH ENHANCED DISEASE RESISTANCE protein (DUF1336) OS=Arabidopsis thaliana OX=3702 GN=At5g35180 PE=1 SV=1	AT5G35180
26.7539	27.1618	25.8225	23.561	21.313	23.7782	26.7222	23.2819	21.1281	22.0792	25.4071	27.2248					+	AP1_WT_ELUATE_AP1_WT_INPUT	33	33	31	25.7	25.7	24.5	189.21	0	99.267	4425000000	76	108	58223000	4.46627	0.000459193	3.99182	7.06954	F4JYC8	F4JYC8		At5g35210	650	sp|F4JYC8|PTM_ARATH DDT domain-containing protein PTM OS=Arabidopsis thaliana OX=3702 GN=PTM PE=1 SV=1	AT5G35210
25.4392	NaN	NaN	25.5473	25.013	24.9846	25.2941	25.5944	25.1172	25.5424	26.3738	NaN							12	12	12	31.8	31.8	31.8	52.92	0	121.01	4889400000	24	78	203720000	0.708476	0.491167	0.402521	1.43046	F4JYQ8	F4JYQ8		emb2737	651	tr|F4JYQ8|F4JYQ8_ARATH Embryo defective 2737 OS=Arabidopsis thaliana OX=3702 GN=emb2737 PE=1 SV=1	AT5G53860
23.7055	23.5974	NaN	23.2179	22.8153	22.8383	24.2252	23.3296	22.006	23.4997	22.9303	NaN							9	9	9	20	20	20	69.291	0	15.629	750480000	35	35	21442000	1.04126	0.25229	0.663448	1.92127	F4JZH9	F4JZH9		At5g12220	657	tr|F4JZH9|F4JZH9_ARATH Las1-like family protein OS=Arabidopsis thaliana OX=3702 GN=MXC9.18 PE=1 SV=1	AT5G12220
28.2133	27.77	29.0614	29.4664	28.9863	29.0826	28.4901	28.9158	28.7117	28.9719	27.6761	28.2916					+	AP1_WT_ELUATE_AP1_WT_INPUT	43	43	29	55.9	55.9	39.7	84.527	0	323.31	56874000000	37	493	1537100000	2.13448	0.0303023	-0.772044	-3.35228	F4JZX8;F4JC74;F4J390	F4JZX8		At5g41770	660	tr|F4JZX8|F4JZX8_ARATH Crooked neck protein, putative / cell cycle protein OS=Arabidopsis thaliana OX=3702 GN=At5g41770 PE=1 SV=1	AT5G41770
24.9834	24.6944	NaN	24.0883	21.8967	21.9644	24.1776	24.2982	24.0833	24.3359	NaN	24.6399							10	10	10	34.1	34.1	34.1	52.067	0	26.499	1533400000	29	39	52875000	1.03849	0.253565	1.17936	1.91714	F4JZZ1	F4JZZ1	DNA primase	POLA3	662	tr|F4JZZ1|F4JZZ1_ARATH DNA primase OS=Arabidopsis thaliana OX=3702 GN=POLA3 PE=1 SV=1	AT5G41880
NaN	NaN	NaN	22.5926	22.3182	21.3404	NaN	23.1553	24.6195	22.5389	25.2305	25.7193							5	5	5	16.6	16.6	16.6	39.761	0	31.993	3293300000	17	35	193720000	1.79487	0.0581059	2.71409	3.31835	F4K087	F4K087		At5g48240	664	tr|F4K087|F4K087_ARATH Rrp15p protein OS=Arabidopsis thaliana OX=3702 GN=MIF21.13 PE=1 SV=1	AT5G48240
NaN	NaN	NaN	24.1639	24.2718	21.6377	NaN	23.4983	23.6634	23.7184	23.7296	24.0459				Trihelix			5	4	4	20.5	16.5	16.5	28.562	0	25.551	2251800000	13	12	173210000	0.220958	1	0.395481	0.551467	F4K0Q7	F4K0Q7		At5g05550	668	tr|F4K0Q7|F4K0Q7_ARATH Sequence-specific DNA binding transcription factor OS=Arabidopsis thaliana OX=3702 GN=MOP10.9 PE=1 SV=1	AT5G05550
27.5468	27.8171	24.2202	25.6318	23.6685	24.2256	28.5707	22.6448	24.4433	22.4932	26.5379	28.5101					+	AP1_WT_ELUATE_AP1_WT_INPUT	31	31	31	26.6	26.6	26.6	179.98	0	126.49	5395100000	76	161	70988000	2.64137	0.0114923	3.34926	4.06079	F4K0Y2	F4K0Y2		At5g12400	670	tr|F4K0Y2|F4K0Y2_ARATH PHD-finger and DNA binding domain-containing protein OS=Arabidopsis thaliana OX=3702 GN=At5g12400 PE=1 SV=1	AT5G12400
26.0814	25.2827	NaN	21.7813	22.1563	21.116	26.4107	22.0512	22.9864	20.2034	24.1765	25.3182					+	AP1_WT_ELUATE_AP1_WT_INPUT	27	16	16	27.2	17.4	17.4	122.89	0	41.032	1101500000	52	54	21183000	4.07033	0.000864196	3.73814	6.73537	F4K128	F4K128	Probable ATP-dependent DNA helicase CHR23	CHR23	671	sp|F4K128|CHR23_ARATH Probable ATP-dependent DNA helicase CHR23 OS=Arabidopsis thaliana OX=3702 GN=CHR23 PE=2 SV=1	AT5G19310
24.3056	25.8191	NaN	25.3585	26.2819	25.6503	25.6153	25.6372	25.4668	25.1626	27.4482	24.2462							19	19	17	38	38	35.2	64.996	0	43.327	3051700000	31	47	98441000	0.0687583	1	-0.105995	-0.189935	F4K172	F4K172		At5g19580	672	tr|F4K172|F4K172_ARATH Glyoxal oxidase-related protein OS=Arabidopsis thaliana OX=3702 GN=At5g19580 PE=1 SV=1	AT5G19580
NaN	NaN	NaN	24.8145	24.5088	24.8251	23.4007	24.1702	24.2743	24.2967	23.8788	NaN					+	AP1_WT_ELUATE_AP1_WT_INPUT	5	5	5	28.1	28.1	28.1	22.259	0	21.364	1724000000	11	17	156730000	1.89682	0.0476143	-0.841866	-3.50933	F4K1U5	F4K1U5		At5g54750	675	tr|F4K1U5|F4K1U5_ARATH Trafficking protein particle complex subunit OS=Arabidopsis thaliana OX=3702 GN=MBG8.1 PE=1 SV=1	AT5G54750
NaN	NaN	25.3122	22.3792	24.0195	21.056	24.9973	24.297	23.8612	24.0842	23.5594	NaN							9	8	8	26.7	23.4	23.4	55.225	0	52.045	1528600000	26	46	58794000	0.801131	0.409555	1.34013	1.58018	F4K1Z0	F4K1Z0		ECT3	676	sp|F4K1Z0|ECT3_ARATH YTH domain-containing protein ECT3 OS=Arabidopsis thaliana OX=3702 GN=ECT3 PE=1 SV=1	AT5G61020
NaN	NaN	NaN	26.3956	26.5717	26.6071	NaN	26.862	26.8221	26.7888	25.0476	25.3932					+	AP1_WT_ELUATE_AP1_WT_INPUT	9	9	9	29.8	29.8	29.8	38.312	0	29.872	6957900000	19	60	366210000	4.04371	0.000900388	-1.45411	-9.2456	F4K217	F4K217		At5g61240	677	tr|F4K217|F4K217_ARATH Leucine-rich repeat (LRR) family protein OS=Arabidopsis thaliana OX=3702 GN=MFB13.23 PE=1 SV=1	AT5G61240
24.987	26.3208	NaN	23.7856	23.3204	23.1743	25.6597	24.1483	23.8006	24.1858	24.5496	25.3986					+	AP1_WT_ELUATE_AP1_WT_INPUT	21	21	21	22.2	22.2	22.2	141.86	0	90.68	2734100000	65	61	42063000	3.12558	0.00463037	1.64728	4.99022	F4K2E9	F4K2E9		EMB3011	679	sp|F4K2E9|PRP16_ARATH Pre-mRNA-splicing factor ATP-dependent RNA helicase DEAH7 OS=Arabidopsis thaliana OX=3702 GN=CUV PE=1 SV=1	AT5G13010
NaN	NaN	NaN	21.6384	23.6202	24.5429	NaN	22.404	24.2648	24.6631	25.2855	24.8397							15	15	14	42.1	42.1	39.4	70.274	0	46.896	1465400000	35	29	41869000	0.826397	0.389052	1.54039	1.65433	F4K2J6;Q8GZ29	F4K2J6		At5g13380	681	tr|F4K2J6|F4K2J6_ARATH Auxin-responsive GH3 family protein OS=Arabidopsis thaliana OX=3702 GN=At5g13380 PE=3 SV=1	AT5G13380
27.5422	27.0258	25.895	23.5777	23.4958	20.8718	26.9101	21.9172	22.3948	23.5406	25.4381	26.3361					+	AP1_WT_ELUATE_AP1_WT_INPUT	22	22	22	38.2	38.2	38.2	99.989	0	81.614	2835200000	46	85	61636000	4.4484	0.000470552	3.89156	7.03525	F4K3T5	F4K3T5		At5g06350	683	tr|F4K3T5|F4K3T5_ARATH ARM repeat superfamily protein OS=Arabidopsis thaliana OX=3702 GN=MHF15.13 PE=1 SV=1	AT5G06350
NaN	NaN	25.9478	24.8895	22.1826	22.0326	NaN	23.4889	22.9347	23.3171	NaN	24.4178							9	9	9	26.3	26.3	26.3	73.403	0	57.445	849020000	33	34	25728000	1.26739	0.163642	2.04192	2.38999	F4K460	F4K460	Mediator of RNA polymerase II transcription subunit 17	MED17	687	sp|F4K460|MED17_ARATH Mediator of RNA polymerase II transcription subunit 17 OS=Arabidopsis thaliana OX=3702 GN=MED17 PE=1 SV=1	AT5G20170
NaN	NaN	NaN	26.5266	23.3318	21.1843	26.1211	26.2144	26.3556	26.4521	25.8482	26.0687							16	16	16	27.7	27.7	27.7	72.011	0	30.804	7830600000	35	44	223730000	0.319657	1	1.00185	0.747688	F4K498	F4K498		At5g27330	690	tr|F4K498|F4K498_ARATH Prefoldin chaperone subunit family protein OS=Arabidopsis thaliana OX=3702 GN=At5g27330 PE=1 SV=1	AT5G27330
NaN	NaN	NaN	25.9077	25.3504	25.7248	NaN	25.4228	23.7556	25.5923	23.9008	24.022							17	17	17	26.5	26.5	26.5	92.576	0	86.302	5804000000	43	63	134980000	1.20687	0.182826	-1.33091	-2.28811	F4K4J0	F4K4J0	THO complex subunit 5B	THO5B	693	sp|F4K4J0|THO5B_ARATH THO complex subunit 5B OS=Arabidopsis thaliana OX=3702 GN=THO5B PE=1 SV=1	AT5G42920
24.8119	25.0271	NaN	24.3117	24.5598	24.5621	24.5682	24.4717	21.5138	23.0026	24.4921	NaN							5	5	5	13.1	13.1	13.1	54.97	0	27.02	2286500000	15	39	152430000	0.790959	0.417711	0.987874	1.54126	F4K567	F4K567		At5g67610	699	tr|F4K567|F4K567_ARATH Transmembrane protein (DUF2215) OS=Arabidopsis thaliana OX=3702 GN=At5g67610 PE=1 SV=1	AT5G67610
31.8668	31.0426	31.3758	33.4126	32.7422	32.9472	31.9098	32.7926	32.3477	33.0256	32.7336	31.9046					+	AP1_WT_ELUATE_AP1_WT_INPUT	26	26	26	61.1	61.1	61.1	48.694	0	323.31	721890000000	24	1220	30079000000	2.52659	0.014254	-1.07245	-3.8972	F4K5B9	F4K5B9		At5g07030	700	tr|F4K5B9|F4K5B9_ARATH Eukaryotic aspartyl protease family protein OS=Arabidopsis thaliana OX=3702 GN=MOJ9.20 PE=1 SV=1	AT5G07030
27.8756	27.4987	26.0489	21.9658	22.9548	21.8704	27.7794	23.0701	23.1037	22.3507	26.4931	27.785					+	AP1_WT_ELUATE_AP1_WT_INPUT	21	21	21	37.6	37.6	37.6	106.68	0	274.22	3374300000	37	80	91196000	6.52181	2.0667e-05	4.69421	11.963	F4K5E2	F4K5E2		At5g13950	701	tr|F4K5E2|F4K5E2_ARATH Nuclear factor kappa-B-binding protein OS=Arabidopsis thaliana OX=3702 GN=MAC12.8 PE=1 SV=1	AT5G13950
28.6196	28.8944	27.6016	27.5769	27.9024	27.789	27.8612	27.837	27.7874	27.9568	27.998	28.2842							51	51	37	37.6	37.6	28.7	173.38	0	323.31	18409000000	92	284	200100000	1.10266	0.223446	0.401593	1.95608	F4K5J1;F4K5I9	F4K5J1	Myosin-17	XI-K	702	sp|F4K5J1|MYO17_ARATH Myosin-17 OS=Arabidopsis thaliana OX=3702 GN=XI-K PE=1 SV=2	AT5G20490
NaN	NaN	NaN	24.7629	24.0884	23.9157	NaN	24.4981	24.3489	24.7023	25.4941	25.3542					+	AP1_WT_ELUATE_AP1_WT_INPUT	19	19	19	17.9	17.9	17.9	184.05	0	119.32	2210400000	102	90	21671000	2.19922	0.0265328	1.03813	4.10512	F4K5S0	F4K5S0		At5g27970	704	tr|F4K5S0|F4K5S0_ARATH ARM repeat superfamily protein OS=Arabidopsis thaliana OX=3702 GN=At5g27970 PE=1 SV=1	AT5G27970
25.8351	25.7402	NaN	27.3228	27.4733	27.6493	27.4281	27.4548	27.3154	27.8515	27.6377	26.0106				GeBP			14	14	8	40.7	40.7	30	46.906	0	133.45	24327000000	16	128	1520400000	1.50803	0.100723	-0.980862	-2.55296	F4K5T4	F4K5T4		At5g28040	705	sp|F4K5T4|STKLU_ARATH Probable transcription factor At5g28040 OS=Arabidopsis thaliana OX=3702 GN=At5g28040 PE=1 SV=1	AT5G28040
NaN	NaN	NaN	24.1809	24.8046	24.686	25.2221	23.7549	24.7719	24.4308	24.6318	25.1362							12	12	12	22	22	22	84.398	0	107.68	2825100000	38	41	74345000	1.09677	0.225903	0.558528	2.0458	F4KB54	F4KB54		At5g08630	720	tr|F4KB54|F4KB54_ARATH DDT domain-containing protein OS=Arabidopsis thaliana OX=3702 GN=MAH20.19 PE=1 SV=1	AT5G08630
NaN	24.8207	NaN	24.2866	24.607	24.6787	NaN	24.6025	24.5355	24.8239	24.8699	24.6914							17	17	17	10.5	10.5	10.5	242.5	0	34.702	2558000000	107	59	23906000	0.960529	0.296119	0.204938	1.83268	F4KB73	F4KB73		At5g15680	721	tr|F4KB73|F4KB73_ARATH ARM repeat superfamily protein OS=Arabidopsis thaliana OX=3702 GN=At5g15680 PE=1 SV=1	AT5G15680
31.2624	30.8388	29.978	26.8959	25.4837	25.1345	31.1676	25.6739	25.4315	25.5701	29.5732	30.7079					+	AP1_WT_ELUATE_AP1_WT_INPUT	87	87	86	48.8	48.8	48.4	247.92	0	323.31	36645000000	103	721	355770000	6.90599	1.40679e-05	4.8897	13.1369	F4KBP5	F4KBP5	Protein CHROMATIN REMODELING 4	CHR4	723	sp|F4KBP5|CHR4_ARATH Protein CHROMATIN REMODELING 4 OS=Arabidopsis thaliana OX=3702 GN=CHR4 PE=2 SV=1	AT5G44800
24.1667	24.5797	24.452	29.8095	29.4996	29.5013	22.9235	29.2268	29.2101	29.92	27.1969	26.9485					+	AP1_WT_ELUATE_AP1_WT_INPUT	72	72	72	52.2	52.2	52.2	206.73	0	323.31	70305000000	96	727	732350000	4.13068	0.000779578	-4.48333	-6.44429	F4KBW6	F4KBW6	Nuclear pore complex protein NUP205	NUP205	724	sp|F4KBW6|NU205_ARATH Nuclear pore complex protein NUP205 OS=Arabidopsis thaliana OX=3702 GN=NUP205 PE=1 SV=1	AT5G51200
NaN	24.2702	NaN	23.923	21.8773	23.6257	NaN	23.8415	23.8198	24.3148	NaN	23.9198							6	6	6	12.9	12.9	12.9	65.911	0	10.463	1041000000	30	11	34700000	0.352267	0.998792	0.528002	0.818496	F4KCL7	F4KCL7	Outer envelope protein 64, mitochondrial	OM64	726	sp|F4KCL7|OE64M_ARATH Outer envelope protein 64, mitochondrial OS=Arabidopsis thaliana OX=3702 GN=OM64 PE=1 SV=1	AT5G09420
23.6278	NaN	NaN	27.3075	26.9033	27.0963	24.991	27.1149	27.3134	27.3479	25.9256	24.8732					+	AP1_WT_ELUATE_AP1_WT_INPUT	21	21	21	31	31	31	107.67	0	227.57	11675000000	44	168	265330000	3.52328	0.00229266	-2.32613	-6.06847	F4KDI6	F4KDI6		At5g58100	732	tr|F4KDI6|F4KDI6_ARATH Transmembrane protein OS=Arabidopsis thaliana OX=3702 GN=At5g58100 PE=1 SV=1	AT5G58100
26.7905	NaN	NaN	27.2959	26.5482	26.564	25.7335	26.7405	26.4901	26.7327	26.7752	25.4166							30	30	30	48.5	48.5	48.5	96.853	0	256.19	10234000000	48	163	213210000	0.91115	0.327285	-0.549584	-1.72559	F4KF14	F4KF14		At5g64580	736	sp|F4KF14|FTSI4_ARATH Probable inactive ATP-dependent zinc metalloprotease FTSHI 4, chloroplastic OS=Arabidopsis thaliana OX=3702 GN=FTSHI4 PE=1 SV=1	AT5G64580
25.0708	NaN	NaN	25.0285	21.8299	21.0118	24.4889	24.5942	21.9174	21.997	NaN	NaN							8	8	8	54	54	54	23.328	0	35.662	1530800000	11	69	139160000	0.823993	0.390969	2.05001	1.65031	F4KF27	F4KF27	Mediator-associated protein 2		737	sp|F4KF27|MDA2_ARATH Mediator-associated protein 2 OS=Arabidopsis thaliana OX=3702 GN=At5g64680 PE=1 SV=1	AT5G64680
29.8621	29.2162	26.5484	31.386	31.077	31.0541	29.6223	31.2918	31.0649	31.3475	29.2227	29.5567					+	AP1_WT_ELUATE_AP1_WT_INPUT	70	70	70	56.2	56.2	56.2	122.78	0	323.31	232170000000	60	1030	3869500000	2.84029	0.00787409	-2.19881	-4.34961	F4KG14	F4KG14		At5g46070	743	tr|F4KG14|F4KG14_ARATH Guanylate-binding family protein OS=Arabidopsis thaliana OX=3702 GN=MCL19.12 PE=1 SV=1	AT5G46070
27.6603	27.8262	25.1254	31.1479	30.5228	30.3522	27.2831	30.5354	30.544	30.5524	28.5079	28.514					+	AP1_WT_ELUATE_AP1_WT_INPUT	70	70	70	45.8	45.8	45.8	210.66	0	323.31	134880000000	86	834	1568400000	3.85573	0.00126764	-3.12296	-5.95978	F4KHD8	F4KHD8	Nuclear pore complex protein GP210	GB210	751	sp|F4KHD8|GP210_ARATH Nuclear pore complex protein GP210 OS=Arabidopsis thaliana OX=3702 GN=GB210 PE=1 SV=1	AT5G40480
NaN	NaN	NaN	27.5035	27.5618	27.6292	NaN	27.3178	27.3584	27.0866	24.794	24.72					+	AP1_WT_ELUATE_AP1_WT_INPUT	18	6	6	24.2	8.5	8.5	74.466	0	172.25	12230000000	22	80	555890000	5.70462	6.89637e-05	-2.65253	-17.8697	F4KIB2	F4KIB2	Transmembrane 9 superfamily member 8	TMN8	753	sp|F4KIB2|TMN8_ARATH Transmembrane 9 superfamily member 8 OS=Arabidopsis thaliana OX=3702 GN=TMN8 PE=2 SV=1	AT5G10840
26.5225	25.9347	NaN	28.7091	28.464	28.0689	24.1622	27.412	27.4366	28.2208	26.8375	26.7459					+	AP1_WT_ELUATE_AP1_WT_INPUT	37	37	37	36.4	36.4	36.4	148.07	0	323.31	24057000000	64	335	375900000	2.48281	0.0154267	-2.01134	-3.96287	F4KIH8	F4KIH8		At5g24710	754	tr|F4KIH8|F4KIH8_ARATH Transducin/WD40 repeat-like superfamily protein OS=Arabidopsis thaliana OX=3702 GN=MXC17.10 PE=1 SV=1	AT5G24710
27.4649	27.553	27.882	22.4081	21.4684	24.2364	27.7225	25.179	25.1578	25.3768	26.4109	27.7927					+	AP1_WT_ELUATE_AP1_WT_INPUT	46	46	46	30.9	30.9	30.9	247.22	0	241.27	7279000000	122	207	59664000	3.22829	0.00386004	3.49991	4.93543	H3K2Y6	H3K2Y6	Mediator of RNA polymerase II transcription subunit 12	MED12	758	sp|H3K2Y6|MED12_ARATH Mediator of RNA polymerase II transcription subunit 12 OS=Arabidopsis thaliana OX=3702 GN=MED12 PE=1 SV=1	AT4G00450
33.606	33.4434	33.8807	35.0938	34.8659	35.0843	32.7651	34.7605	34.5134	34.6347	33.8369	33.7153					+	AP1_WT_ELUATE_AP1_WT_INPUT	45	45	45	67.4	67.4	67.4	52.954	0	323.31	1962700000000	22	3264	89216000000	4.22905	0.000671189	-1.28422	-6.62356	O03042;P93292;F4INE2	O03042	Ribulose bisphosphate carboxylase large chain	rbcL	759	sp|O03042|RBL_ARATH Ribulose bisphosphate carboxylase large chain OS=Arabidopsis thaliana OX=3702 GN=rbcL PE=1 SV=1	ATCG00490
26.171	24.7772	NaN	28.5197	29.2828	28.7689	25.0953	28.44	28.7547	28.0163	27.6237	27.2332					+	AP1_WT_ELUATE_AP1_WT_INPUT	27	27	17	61.9	61.9	46.6	48.527	0	323.31	26254000000	27	254	972360000	2.83764	0.00791215	-2.45035	-4.51686	O04151	O04151	Calreticulin-1	CRT1	766	sp|O04151|CALR1_ARATH Calreticulin-1 OS=Arabidopsis thaliana OX=3702 GN=CRT1 PE=1 SV=1	AT1G56340
NaN	NaN	NaN	24.2856	24.3055	24.3495	NaN	24.9	25.1578	24.7078	24.3891	24.2658							6	6	6	32	32	32	36.213	0	73.154	1946600000	14	60	139040000	0.485074	0.768616	-0.29026	-1.06634	O04200	O04200	Peroxisomal nicotinamide adenine dinucleotide carrier	PXN	770	sp|O04200|PXN_ARATH Peroxisomal nicotinamide adenine dinucleotide carrier OS=Arabidopsis thaliana OX=3702 GN=PXN PE=1 SV=1	AT2G39970
NaN	25.4156	NaN	26.8053	27.2688	26.6427	24.9575	26.3491	26.2683	26.4079	27.4568	26.924							12	12	12	73.4	73.4	73.4	31.862	0	153.49	12086000000	16	109	755380000	0.380117	0.944861	-0.435213	-0.85627	O04202	O04202	Eukaryotic translation initiation factor 3 subunit F	TIF3F1	771	sp|O04202|EIF3F_ARATH Eukaryotic translation initiation factor 3 subunit F OS=Arabidopsis thaliana OX=3702 GN=TIF3F1 PE=1 SV=1	AT2G39990
30.6332	30.9184	31.8087	30.8242	30.9547	30.4485	31.812	30.2657	29.92	30.7562	31.774	32.017					+	AP1_WT_ELUATE_AP1_WT_INPUT	27	27	26	77.6	77.6	74.1	48.496	0	323.31	172240000000	21	1037	8201800000	2.18436	0.0273376	0.965668	3.42059	O04309	O04309	Jacalin-related lectin 35	JAL35	777	sp|O04309|JAL35_ARATH Jacalin-related lectin 35 OS=Arabidopsis thaliana OX=3702 GN=JAL35 PE=1 SV=1	AT3G16470
26.4966	25.13	27.0001	29.0559	29.3497	29.4117	27.1793	29.4319	29.9205	29.2934	28.3768	27.5754					+	AP1_WT_ELUATE_AP1_WT_INPUT	15	15	9	75.5	75.5	49.8	30.399	0	323.31	52208000000	16	330	3263000000	3.46203	0.00256059	-2.45082	-5.3049	O04331;Q9LY99	O04331	Prohibitin-3, mitochondrial	PHB3	779	sp|O04331|PHB3_ARATH Prohibitin-3, mitochondrial OS=Arabidopsis thaliana OX=3702 GN=PHB3 PE=1 SV=1	AT5G40770
NaN	24.1766	NaN	24.1987	23.9231	23.8166	24.1442	23.8428	24.168	24.6739	24.608	24.5633							6	6	3	14.6	14.6	10.2	57.471	0	78.883	1544200000	27	34	57193000	0.704828	0.494422	0.269212	1.40612	O04376;Q93YV6	O04376	Serine/threonine protein phosphatase 2A 57 kDa regulatory subunit B beta isoform	BBETA	782	sp|O04376|2A5B_ARATH Serine/threonine protein phosphatase 2A 57 kDa regulatory subunit B beta isoform OS=Arabidopsis thaliana OX=3702 GN=BBETA PE=1 SV=1	AT3G09880
25.6182	25.6199	25.7096	28.3432	28.0448	28.8232	25.2727	28.3292	28.8755	28.8186	27.6724	27.7658					+	AP1_WT_ELUATE_AP1_WT_INPUT	36	36	35	43.7	43.7	42.1	116.19	0	323.31	43402000000	54	403	803750000	3.07355	0.00509934	-2.26263	-4.69793	O04379;Q9XGW1	O04379	Protein argonaute 1	AGO1	783	sp|O04379|AGO1_ARATH Protein argonaute 1 OS=Arabidopsis thaliana OX=3702 GN=AGO1 PE=1 SV=1	AT1G48410
25.9268	25.4244	26.0146	28.1157	28.6058	28.3041	25.7191	28.5891	28.2981	28.3957	28.0552	27.579					+	AP1_WT_ELUATE_AP1_WT_INPUT	30	30	30	72.5	72.5	72.5	59.384	0	323.31	30605000000	30	376	1020200000	2.80062	0.00840869	-1.93158	-4.29143	O04450;Q67ZE4	O04450	T-complex protein 1 subunit epsilon	CCT5	785	sp|O04450|TCPE_ARATH T-complex protein 1 subunit epsilon OS=Arabidopsis thaliana OX=3702 GN=CCT5 PE=1 SV=1	AT1G24510
NaN	NaN	NaN	23.9236	23.8757	23.6035	24.9163	23.4857	23.5356	23.8234	24.1305	NaN					+	AP1_WT_ELUATE_AP1_WT_INPUT	9	9	9	44.8	44.8	44.8	37.498	0	39.096	1405600000	16	69	87850000	1.89531	0.0477165	0.815479	3.50647	O04482	O04482	Ubiquitin carboxyl-terminal hydrolase	F5I14.18	786	sp|O04482|UCH2_ARATH Ubiquitin carboxyl-terminal hydrolase 2 OS=Arabidopsis thaliana OX=3702 GN=UCH2 PE=1 SV=1	AT1G65650
24.0965	NaN	NaN	28.5431	29.0971	28.8153	NaN	28.7475	28.5556	28.5489	26.7096	26.223					+	AP1_WT_ELUATE_AP1_WT_INPUT	22	10	10	56	27.5	27.5	46.66	0	164.22	26845000000	17	99	1579100000	3.09694	0.00488824	-3.04153	-5.61896	O04487	O04487	Probable elongation factor 1-gamma 1		788	sp|O04487|EF1G1_ARATH Probable elongation factor 1-gamma 1 OS=Arabidopsis thaliana OX=3702 GN=At1g09640 PE=1 SV=1	AT1G09640
25.5036	NaN	NaN	26.2595	25.5303	26.0747	25.2658	26.1155	26.3518	26.2084	25.6901	25.5713					+	AP1_WT_ELUATE_AP1_WT_INPUT	6	6	6	13.8	13.8	13.8	47.661	0	13.216	5174300000	15	64	344950000	2.11425	0.0313156	-0.582326	-3.534	O04496	O04496		F21M12.13	789	sp|O04496|AED3_ARATH Aspartyl protease AED3 OS=Arabidopsis thaliana OX=3702 GN=AED3 PE=1 SV=1	AT1G09750
24.8795	24.6822	NaN	24.4134	25.4007	24.0218	NaN	24.4374	26.2882	25.0643	27.7925	26.2997							24	24	15	63.4	63.4	46.1	60.579	0	156.99	4795200000	31	74	154680000	0.684703	0.514489	0.975835	1.37409	O04499	O04499	2,3-bisphosphoglycerate-independent phosphoglycerate mutase 1	PGM1	790	sp|O04499|PMG1_ARATH 2,3-bisphosphoglycerate-independent phosphoglycerate mutase 1 OS=Arabidopsis thaliana OX=3702 GN=PGM1 PE=1 SV=3	AT1G09780
28.4523	28.1159	28.3607	28.2782	28.0065	28.2223	28.4003	28.4446	28.7646	28.4149	28.2216	28.291							15	15	15	59.2	59.2	59.2	28.343	0	119.67	36431000000	19	239	1917400000	0.164094	1	-0.0482445	-0.41721	O04603	O04603	50S ribosomal protein L5, chloroplastic	RPL5	793	sp|O04603|RK5_ARATH 50S ribosomal protein L5, chloroplastic OS=Arabidopsis thaliana OX=3702 GN=RPL5 PE=2 SV=1	AT4G01310
27.8529	28.0077	24.7194	28.0607	27.8393	27.5922	27.7542	27.8571	27.428	27.4836	27.5556	27.7867							18	18	18	61.9	61.9	61.9	38.325	0	156.24	17678000000	24	168	736570000	0.365154	0.973768	-0.430705	-0.819928	O04619;F4JU70;F4HW79	O04619	Mitochondrial adenine nucleotide transporter ADNT1	ADNT1	795	sp|O04619|ADNT1_ARATH Mitochondrial adenine nucleotide transporter ADNT1 OS=Arabidopsis thaliana OX=3702 GN=ADNT1 PE=1 SV=1	AT4G01100
NaN	24.4183	24.0602	27.7331	27.7257	27.5995	24.1312	27.5774	27.1109	27.8925	26.5787	25.0629					+	AP1_WT_ELUATE_AP1_WT_INPUT	30	30	30	48.4	48.4	48.4	80.935	0	249.13	14901000000	41	153	363440000	3.84355	0.00128984	-2.75623	-6.28589	O04630;Q8GZ45	O04630	Threonine--tRNA ligase, mitochondrial	THRRS	796	sp|O04630|SYTM1_ARATH Threonine--tRNA ligase, mitochondrial 1 OS=Arabidopsis thaliana OX=3702 GN=THRRS PE=1 SV=3	AT5G26830
29.8286	29.3902	30.2811	30.3128	29.7606	29.5705	29.8961	30.0249	29.2133	29.9955	29.6402	29.7985							38	30	30	72.6	59.5	59.5	58.754	0	323.31	106730000000	25	680	4269300000	0.0123548	1	-0.00716114	-0.0360487	O04658	O04658	Probable nucleolar protein 5-1	NOP5-1	797	sp|O04658|NOP5A_ARATH Probable nucleolar protein 5-1 OS=Arabidopsis thaliana OX=3702 GN=NOP5-1 PE=1 SV=2	AT5G27120
NaN	NaN	NaN	23.0527	22.3063	21.3324	NaN	22.3004	21.017	22.0056	23.7246	23.4239							11	4	4	69.9	28.5	28.5	22.03	0	33.022	505450000	13	37	38881000	1.5314	0.0961909	1.57187	2.84387	O04834;O80489;Q3E6Q3	O04834	GTP-binding protein SAR1A	SAR1A	799	sp|O04834|SAR1A_ARATH GTP-binding protein SAR1A OS=Arabidopsis thaliana OX=3702 GN=SAR1A PE=2 SV=1	AT4G02080
32.6608	32.6712	33.4847	32.5328	32.6145	32.8504	32.7175	32.7054	32.7331	32.8666	34.0979	32.9728							12	12	7	73.9	73.9	60.6	14.813	0	323.31	806850000000	7	281	115260000000	0.838427	0.380317	0.383689	1.58052	O04848;Q9S9K7	O04848;Q9S9K7	Probable histone H2AXa;Probable histone H2AXb		800	sp|O04848|H2AXA_ARATH Probable histone H2AXa OS=Arabidopsis thaliana OX=3702 GN=At1g08880 PE=1 SV=1;sp|Q9S9K7|H2AXB_ARATH Probable histone H2AXb OS=Arabidopsis thaliana OX=3702 GN=At1g54690 PE=1 SV=1	AT1G08880;AT1G54690
NaN	NaN	NaN	25.7116	25.6434	25.8756	NaN	25.557	25.7199	25.3036	24.6568	25.1318					+	AP1_WT_ELUATE_AP1_WT_INPUT	6	6	5	17.1	17.1	15.4	48.659	0	221.72	4003800000	15	86	266920000	2.17703	0.0277752	-0.74088	-4.05976	O04928	O04928	Phosphatidate cytidylyltransferase 1	CDS1	804	sp|O04928|CDS1_ARATH Phosphatidate cytidylyltransferase 1 OS=Arabidopsis thaliana OX=3702 GN=CDS1 PE=1 SV=1	AT1G62430
26.3936	NaN	NaN	27.4054	27.8724	27.2729	NaN	27.381	27.3116	27.3537	26.3658	26.6948					+	AP1_WT_ELUATE_AP1_WT_INPUT	18	18	18	54.2	54.2	54.2	58.386	0	169.51	13090000000	31	124	422250000	3.42402	0.00274624	-0.948128	-6.37345	O04983	O04983	Biotin carboxylase, chloroplastic	CAC2	805	sp|O04983|ACCC_ARATH Biotin carboxylase, chloroplastic OS=Arabidopsis thaliana OX=3702 GN=CAC2 PE=1 SV=1	AT5G35360
NaN	NaN	NaN	27.7972	26.6901	27.0568	NaN	26.5645	26.8185	26.5629	26.5556	24.5472							10	10	8	35.5	35.5	33.6	43.074	0	142.12	11121000000	15	78	741400000	1.22302	0.177025	-1.36358	-2.31523	O22126	O22126	Fasciclin-like arabinogalactan protein 8	FLA8	808	sp|O22126|FLA8_ARATH Fasciclin-like arabinogalactan protein 8 OS=Arabidopsis thaliana OX=3702 GN=FLA8 PE=2 SV=1	AT2G45470
26.8664	27.2726	27.3753	25.9142	25.4655	25.372	27.1366	26.0214	25.5017	25.8815	26.9348	26.6127					+	AP1_WT_ELUATE_AP1_WT_INPUT	6	6	6	36.5	36.5	36.5	18.942	0	220.71	6499200000	5	81	1299800000	5.06805	0.00018286	1.34037	8.29642	O22165	O22165	Probable ribosome biogenesis protein RLP24		812	sp|O22165|RLP24_ARATH Probable ribosome biogenesis protein RLP24 OS=Arabidopsis thaliana OX=3702 GN=At2g44860 PE=1 SV=1	AT2G44860
29.0995	28.831	28.1566	26.279	25.8452	26.1694	29.4428	26.299	26.0965	26.4905	27.9501	28.9212					+	AP1_WT_ELUATE_AP1_WT_INPUT	35	35	35	54.4	54.4	54.4	103.87	0	171.24	12277000000	40	291	306940000	5.86653	5.42875e-05	2.53696	10.1716	O22207;Q9C585	O22207	Ubiquitin carboxyl-terminal hydrolase 5	UBP5	816	sp|O22207|UBP5_ARATH Ubiquitin carboxyl-terminal hydrolase 5 OS=Arabidopsis thaliana OX=3702 GN=UBP5 PE=1 SV=2	AT2G40930
23.9453	NaN	NaN	24.7431	23.5355	22.6281	23.8469	23.9928	23.2179	23.7108	24.5434	24.4505							13	6	6	18.3	11	11	112.75	0	45.234	1605200000	43	56	37330000	0.719716	0.480055	0.558462	1.4297	O22218	O22218	Calcium-transporting ATPase 4, plasma membrane-type	ACA4	820	sp|O22218|ACA4_ARATH Calcium-transporting ATPase 4, plasma membrane-type OS=Arabidopsis thaliana OX=3702 GN=ACA4 PE=1 SV=1	AT2G41560
26.2491	25.6476	26.3866	29.471	28.9998	29.037	27.3939	28.8889	28.9952	29.0072	27.8604	28.02					+	AP1_WT_ELUATE_AP1_WT_INPUT	39	39	32	63	63	55.3	96.614	0	323.31	54211000000	43	584	1260700000	3.46256	0.00256059	-2.14022	-5.30575	O22224	O22224	Nuclear pore complex protein NUP93A	NUP93A	821	sp|O22224|NP93A_ARATH Nuclear pore complex protein NUP93A OS=Arabidopsis thaliana OX=3702 GN=NUP93A PE=1 SV=2	AT2G41620
31.6596	31.6181	32.4999	31.6118	32.1538	32.4842	33.1097	32.4844	32.8926	32.459	31.9543	31.4052							15	15	15	49.9	49.9	49.9	39.496	0	36.604	266060000000	20	85	13303000000	0.448097	0.82765	-0.306515	-0.966952	O22263	O22263	Protein disulfide-isomerase like 2-1	PDIL2-1	823	sp|O22263|PDI21_ARATH Protein disulfide-isomerase like 2-1 OS=Arabidopsis thaliana OX=3702 GN=PDIL2-1 PE=2 SV=1	AT2G47470
25.5524	NaN	27.294	28.0676	27.9298	28.2692	27.5604	28.3955	28.9088	27.8608	28.2744	27.8782							17	14	14	46.5	40.6	40.6	33.729	0	71.847	39340000000	14	168	2810000000	1.13268	0.210387	-0.926728	-2.02374	O22315;F4JHI7	O22315	Serine/arginine-rich-splicing factor SR34	SR34	827	sp|O22315|SR34_ARATH Serine/arginine-rich-splicing factor SR34 OS=Arabidopsis thaliana OX=3702 GN=SR34 PE=1 SV=1	AT1G02840
26.1902	25.7498	26.1429	26.9205	26.4608	26.8188	27.6048	26.5187	26.6678	26.4644	26.7385	26.2972							15	15	14	47.5	47.5	45.9	56.022	0	133.63	11138000000	28	126	397800000	0.291533	1	-0.187921	-0.681458	O22446;Q9FH09	O22446	Histone deacetylase 19	HDA19	828	sp|O22446|HDA19_ARATH Histone deacetylase 19 OS=Arabidopsis thaliana OX=3702 GN=HDA19 PE=1 SV=2	AT4G38130
33.0032	33.0943	33.462	23.6403	21.999	23.5424	33.2704	21.7416	23.5902	24.2482	30.8627	32.7924				MIKC_MADS	+	AP1_WT_ELUATE_AP1_WT_INPUT	14	12	12	56.6	48.2	48.2	29.066	0	323.31	70899000000	10	376	7089900000	7.9777	4.34508e-06	9.62056	16.9862	O22456	O22456	Developmental protein SEPALLATA 3	2023-09-03	829	sp|O22456|SEP3_ARATH Developmental protein SEPALLATA 3 OS=Arabidopsis thaliana OX=3702 GN=SEP3 PE=1 SV=1	AT1G24260
28.274	28.0969	27.8149	27.5059	27.2459	27.1068	28.6699	26.7266	26.7975	26.5446	27.0513	28.1064					+	AP1_WT_ELUATE_AP1_WT_INPUT	19	19	19	77.8	77.8	77.8	48.194	0	258.2	17312000000	17	240	1018400000	2.46337	0.0160075	1.01437	3.80798	O22467	O22467	Histone-binding protein MSI1	MSI1	830	sp|O22467|MSI1_ARATH Histone-binding protein MSI1 OS=Arabidopsis thaliana OX=3702 GN=MSI1 PE=1 SV=1	AT5G58230
NaN	NaN	NaN	22.5179	22.6936	21.611	NaN	22.0288	22.572	22.6657	23.9778	24.5315					+	AP1_WT_ELUATE_AP1_WT_INPUT	5	3	3	12.8	7.7	7.7	46.703	0	4.8047	681430000	19	13	35865000	2.80293	0.00837453	1.90653	5.45888	O22468	O22468	WD-40 repeat-containing protein MSI2	MSI2	831	sp|O22468|MSI2_ARATH WD-40 repeat-containing protein MSI2 OS=Arabidopsis thaliana OX=3702 GN=MSI2 PE=2 SV=1	AT2G16780
27.1572	26.8862	NaN	25.6447	25.3506	25.8746	27.2607	25.6109	25.5902	25.663	26.1716	26.4406					+	AP1_WT_ELUATE_AP1_WT_INPUT	15	15	13	66.3	66.3	61.3	47.983	0	218.22	5790000000	22	114	263180000	3.54273	0.00222894	1.16093	5.721	O22469	O22469	WD-40 repeat-containing protein MSI3	MSI3	832	sp|O22469|MSI3_ARATH WD-40 repeat-containing protein MSI3 OS=Arabidopsis thaliana OX=3702 GN=MSI3 PE=1 SV=2	AT4G35050
29.7798	30.8249	30.7081	28.1659	28.538	28.4612	29.1909	27.9751	28.5795	28.6739	28.7425	30.1965					+	AP1_WT_ELUATE_AP1_WT_INPUT	26	26	24	84.6	84.6	80.3	55.758	0	323.31	45170000000	25	502	1806800000	2.75669	0.00918718	1.50818	4.22736	O22607	O22607	WD-40 repeat-containing protein MSI4	MSI4	836	sp|O22607|MSI4_ARATH WD-40 repeat-containing protein MSI4 OS=Arabidopsis thaliana OX=3702 GN=MSI4 PE=1 SV=3	AT2G19520
26.152	NaN	NaN	21.7435	21.8809	21.5143	26.028	22.2222	21.8628	22.8981	25.3968	25.753					+	AP1_WT_ELUATE_AP1_WT_INPUT	8	8	8	25.3	25.3	25.3	34.397	0	17.439	1414600000	15	29	94307000	6.06761	4.10649e-05	3.81215	13.5282	O22703	O22703	Glycine-rich RNA-binding protein RZ1B	RZ1B	839	sp|O22703|RZ1B_ARATH Glycine-rich RNA-binding protein RZ1B OS=Arabidopsis thaliana OX=3702 GN=RZ1B PE=2 SV=1	AT1G60650
NaN	NaN	NaN	23.6343	23.5644	23.5267	NaN	23.1959	22.6165	23.2843	24.4731	23.2794							8	8	8	29.4	29.4	29.4	49.032	0	66.792	1016100000	21	45	48388000	0.698794	0.500143	0.572527	1.43946	O22715;Q9SAC9	O22715	AP-1 complex subunit mu-2	AP1M2	842	sp|O22715|AP1M2_ARATH AP-1 complex subunit mu-2 OS=Arabidopsis thaliana OX=3702 GN=AP1M2 PE=1 SV=1	AT1G60780
NaN	NaN	NaN	25.6204	25.557	25.0779	25.7456	25.1043	25.4863	25.3902	25.5623	24.712							7	7	7	24.7	24.7	24.7	53.094	0	22.479	3678100000	21	50	175150000	0.0460264	1	-0.0327705	-0.131023	O22775;Q9LZJ3	O22775	Xyloglucan 6-xylosyltransferase 2	XXT2	847	sp|O22775|XXT2_ARATH Xyloglucan 6-xylosyltransferase 2 OS=Arabidopsis thaliana OX=3702 GN=XXT2 PE=1 SV=1	AT4G02500
NaN	NaN	NaN	24.512	24.1768	24.6588	NaN	24.1595	23.9334	24.094	23.8242	23.7592							4	4	4	22.4	22.4	22.4	32.658	0	61.653	1420600000	13	40	109280000	1.1967	0.186114	-0.464056	-2.27104	O22784	O22784	Cysteine-rich repeat secretory protein 11	CRRSP11	848	sp|O22784|PDLP3_ARATH Plasmodesmata-located protein 3 OS=Arabidopsis thaliana OX=3702 GN=PDLP3 PE=1 SV=2	AT2G33330
28.6456	28.5546	29.2669	29.4926	29.5158	29.6128	28.851	29.9345	29.9813	30.046	28.9036	28.6621					+	AP1_WT_ELUATE_AP1_WT_INPUT	27	27	25	73.3	73.3	69.3	56.727	0	323.31	102500000000	28	653	3660600000	4.14341	0.000767592	-0.949864	-6.46731	O22785	O22785	Pre-mRNA-processing factor 19 homolog 2	PRP19B	849	sp|O22785|PR19B_ARATH Pre-mRNA-processing factor 19 homolog 2 OS=Arabidopsis thaliana OX=3702 GN=PRP19B PE=1 SV=3	AT2G33340
26.3488	25.9179	26.0824	24.1356	21.4951	24.5092	25.47	22.2246	24.7013	21.6382	26.4845	25.5093					+	AP1_WT_ELUATE_AP1_WT_INPUT	6	6	6	18.2	18.2	18.2	16.033	0	45.009	3977800000	9	41	441970000	2.94948	0.00644198	2.85147	4.51129	O22795	O22795	50S ribosomal protein L28, chloroplastic	RPL28	852	sp|O22795|RK28_ARATH 50S ribosomal protein L28, chloroplastic OS=Arabidopsis thaliana OX=3702 GN=RPL28 PE=2 SV=2	AT2G33450
28.2151	28.4709	29.1948	27.0966	27.9039	27.9331	28.9629	28.339	28.4147	28.3277	27.898	28.0947							21	21	21	73.5	73.5	73.5	37.885	0	323.31	28646000000	19	296	1507700000	0.865976	0.359162	0.47022	1.62069	O22826	O22826		At2g43770	857	tr|O22826|O22826_ARATH At2g43770 OS=Arabidopsis thaliana OX=3702 GN=At2g43770 PE=1 SV=1	AT2G43770
NaN	NaN	NaN	24.9119	25.3776	25.1038	NaN	24.9424	24.6655	24.997	24.3196	24.0571					+	AP1_WT_ELUATE_AP1_WT_INPUT	11	11	8	37.4	37.4	28.7	45.692	0	40.524	2416900000	23	43	105080000	2.32432	0.0209993	-0.811336	-4.36613	O22832	O22832	Acyl-[acyl-carrier-protein] desaturase 7, chloroplastic	FAB2	858	sp|O22832|STAD7_ARATH Stearoyl-[acyl-carrier-protein] 9-desaturase 7, chloroplastic OS=Arabidopsis thaliana OX=3702 GN=FAB2 PE=1 SV=1	AT2G43710
27.751	27.5851	27.325	26.6296	26.2833	26.3164	27.6806	26.3358	26.6718	26.6458	27.4863	27.9554					+	AP1_WT_ELUATE_AP1_WT_INPUT	6	6	6	60.9	60.9	60.9	8.1216	0	90.863	13794000000	3	108	4597900000	5.7255	6.74116e-05	1.1501	9.81745	O22860	O22860	60S ribosomal protein L38	RPL38A	860	sp|O22860|RL38_ARATH 60S ribosomal protein L38 OS=Arabidopsis thaliana OX=3702 GN=RPL38B PE=3 SV=1	AT2G43460
28.5307	28.2676	27.1247	29.017	28.7983	28.8159	28.4825	29.0312	28.7319	28.8136	28.81	28.1321							29	29	29	59.1	59.1	59.1	74.597	0	300.6	37504000000	33	459	1136500000	1.59607	0.0852089	-0.643341	-2.62573	O22898;A0A1P8B2A8	O22898	Long chain acyl-CoA synthetase 1	LACS1	866	sp|O22898|LACS1_ARATH Long chain acyl-CoA synthetase 1 OS=Arabidopsis thaliana OX=3702 GN=LACS1 PE=2 SV=1	AT2G47240
NaN	NaN	NaN	25.9187	25.7866	25.6334	25.185	26.6816	26.4	26.6937	24.1652	24.9027					+	AP1_WT_ELUATE_AP1_WT_INPUT	7	7	5	48.7	48.7	38.4	26.237	0	50.829	11406000000	8	64	1425700000	2.38969	0.0184951	-1.43469	-4.19185	O22922	O22922	U2 small nuclear ribonucleoprotein B	U2B	871	sp|O22922|RU2B1_ARATH U2 small nuclear ribonucleoprotein B OS=Arabidopsis thaliana OX=3702 GN=U2B PE=1 SV=1	AT2G30260
23.912	23.8061	23.9712	28.0622	27.0387	27.5652	24.0331	27.1865	26.5667	27.1086	26.5582	26.3337					+	AP1_WT_ELUATE_AP1_WT_INPUT	29	29	29	42.5	42.5	42.5	105.54	0	323.31	13892000000	49	275	283520000	2.84224	0.00784902	-2.48559	-4.35248	O22993	O22993		T19F6.22	880	sp|O22993|FTSI1_ARATH Probable inactive ATP-dependent zinc metalloprotease FTSHI 1, chloroplastic OS=Arabidopsis thaliana OX=3702 GN=FTSHI1 PE=1 SV=1	AT4G23940
NaN	25.3211	NaN	26.2762	26.7794	26.6623	NaN	26.5249	26.213	26.4608	26.5291	26.0583							15	15	15	57.9	57.9	57.9	36.538	0	51.086	7181400000	19	96	377970000	1.03751	0.253969	-0.516607	-1.95327	O23016	O23016	Probable voltage-gated potassium channel subunit beta	KAB1	881	sp|O23016|KCAB_ARATH Probable voltage-gated potassium channel subunit beta OS=Arabidopsis thaliana OX=3702 GN=KAB1 PE=1 SV=1	AT1G04690
29.4641	28.6888	29.1229	28.7581	28.3846	28.5618	29.0942	28.6676	29.1103	28.6078	29.2275	28.7615							18	18	18	61.4	61.4	61.4	24.705	0	105.66	43422000000	14	289	3101600000	1.45691	0.111748	0.378125	2.43879	O23049	O23049	50S ribosomal protein L6, chloroplastic	RPL6	884	sp|O23049|RK6_ARATH 50S ribosomal protein L6, chloroplastic OS=Arabidopsis thaliana OX=3702 GN=RPL6 PE=2 SV=1	AT1G05190
NaN	23.3336	NaN	27.4579	27.5694	27.5831	NaN	26.9436	26.9509	26.9709	25.6929	25.6744					+	AP1_WT_ELUATE_AP1_WT_INPUT	25	25	15	41.7	41.7	25.6	90.168	0	130.21	10818000000	43	158	251580000	2.43861	0.0168531	-2.34565	-4.28289	O23052	O23052	Uncharacterized TPR repeat-containing protein At1g05150		885	sp|O23052|Y1515_ARATH Uncharacterized TPR repeat-containing protein At1g05150 OS=Arabidopsis thaliana OX=3702 GN=At1g05150 PE=1 SV=1	AT1G05150
NaN	25.6036	NaN	26.1223	25.5662	25.598	NaN	25.8311	25.9148	25.8279	25.6793	NaN							15	13	13	18.7	16.1	16.1	115.83	0	231.02	4979600000	40	74	124490000	0.496462	0.750826	-0.168573	-1.08688	O23087	O23087	Calcium-transporting ATPase 2, endoplasmic reticulum-type	ECA2	888	sp|O23087|ECA2_ARATH Calcium-transporting ATPase 2, endoplasmic reticulum-type OS=Arabidopsis thaliana OX=3702 GN=ECA2 PE=1 SV=1	AT4G00900
27.5104	26.5602	NaN	27.2932	27.297	26.7117	25.9484	26.6879	25.9023	25.8698	27.7058	26.6621							7	5	5	94.7	78.8	78.8	11.307	0	318.83	11556000000	3	122	3851900000	0.255512	1	0.250381	0.612682	O23095	O23095	60S acidic ribosomal protein P1-2	RPP1B	890	sp|O23095|RLA12_ARATH 60S acidic ribosomal protein P1-2 OS=Arabidopsis thaliana OX=3702 GN=RPP1B PE=1 SV=2	AT4G00810
26.6732	25.7463	25.9261	25.7646	26.036	26.2383	26.2883	25.9343	25.8419	25.9198	26.7872	26.1679							14	14	14	39.7	39.7	39.7	49.322	0	30.566	4711900000	24	74	196330000	0.933442	0.313224	0.30901	1.71792	O23140	O23140	AP-2 complex subunit mu	AP2M	892	sp|O23140|AP2M_ARATH AP-2 complex subunit mu OS=Arabidopsis thaliana OX=3702 GN=AP2M PE=1 SV=1	AT5G46630
NaN	NaN	24.7185	27.3322	27.0991	27.429	NaN	28.2918	27.8708	28.2102	23.7033	24.7315					+	AP1_WT_ELUATE_AP1_WT_INPUT	23	23	23	46.9	46.9	46.9	68.878	0	323.31	22876000000	31	241	737950000	4.37078	0.000536038	-3.32106	-9.00246	O23144	O23144	Proton pump-interactor 1	PPI1	893	sp|O23144|PPI1_ARATH Proton pump-interactor 1 OS=Arabidopsis thaliana OX=3702 GN=PPI1 PE=1 SV=2	AT4G27500
NaN	NaN	NaN	21.5451	22.4694	20.1618	NaN	23.2548	23.1496	23.32	24.2244	23.0664							5	5	5	16.7	16.7	16.7	55.622	0	16.611	958110000	26	26	36850000	0.655835	0.543218	1.32865	1.36613	O23155	O23155		C7A10.30	894	tr|O23155|O23155_ARATH At4g37330 OS=Arabidopsis thaliana OX=3702 GN=C7A10.30 PE=1 SV=1	AT4G37330
NaN	NaN	NaN	21.8252	22.6006	22.42	25.309	22.6466	22.3706	22.3267	24.6384	24.9299					+	AP1_WT_ELUATE_AP1_WT_INPUT	7	7	7	22.7	22.7	22.7	55.671	0	18.148	556180000	28	17	19864000	5.19112	0.000151679	2.59416	11.9772	O23215	O23215		C7A10.710	900	sp|O23215|PBRP1_ARATH Plant-specific TFIIB-related protein 1 OS=Arabidopsis thaliana OX=3702 GN=PBRP1 PE=2 SV=1	AT4G36650
NaN	NaN	NaN	25.7558	25.764	26.0728	24.9375	25.5729	26.4521	25.659	25.8035	25.3665							10	10	8	19.3	19.3	16	72.386	0	51.55	4725700000	35	69	135020000	1.06724	0.239699	-0.510254	-1.99971	O23247	O23247		T25K17.110	902	sp|O23247|SYRM_ARATH Arginine--tRNA ligase, chloroplastic/mitochondrial OS=Arabidopsis thaliana OX=3702 GN=EMB1027 PE=1 SV=1	AT4G26300
28.4313	28.3259	27.8627	28.7069	30.0405	29.8071	27.7287	29.895	29.9909	29.8087	29.2566	29.1131					+	AP1_WT_ELUATE_AP1_WT_INPUT	31	31	31	88.1	88.1	88.1	51.717	0	323.31	57366000000	21	430	2731700000	2.48027	0.0154827	-1.25514	-3.83177	O23254;Q9SVM4	O23254	Serine hydroxymethyltransferase 4	SHM4	904	sp|O23254|GLYC4_ARATH Serine hydroxymethyltransferase 4 OS=Arabidopsis thaliana OX=3702 GN=SHM4 PE=1 SV=1	AT4G13930
30.3617	30.3712	29.9191	31.3332	32.0859	31.7879	30.1784	31.6428	31.6934	31.5953	31.0739	30.9621					+	AP1_WT_ELUATE_AP1_WT_INPUT	38	38	16	80	80	36.9	53.378	0	323.31	242970000000	25	1050	9718700000	3.74751	0.00151158	-1.21203	-5.77541	O23255	O23255	Adenosylhomocysteinase 1	SAHH1	905	sp|O23255|SAHH1_ARATH Adenosylhomocysteinase 1 OS=Arabidopsis thaliana OX=3702 GN=SAHH1 PE=1 SV=1	AT4G13940
29.9074	30.318	30.624	25.2648	24.7637	27.7857	28.2878	28.6671	29.4397	28.8427	28.2617	28.5986							8	8	8	33.3	33.3	33.3	12.125	0	106.44	33712000000	4	105	8428000000	1.16457	0.198188	1.87229	2.04165	O23290	O23290	60S ribosomal protein L36a	RPL36AA	907	sp|O23290|RL36A_ARATH 60S ribosomal protein L36a OS=Arabidopsis thaliana OX=3702 GN=RPL36AB PE=3 SV=3	AT3G23390
27.4716	NaN	NaN	27.1099	21.9627	22.0418	27.4439	27.4286	22.0843	22.7988	27.6245	NaN							4	4	4	2.8	2.8	2.8	267.06	0	7.4985	16645000000	121	20	137560000	1.2593	0.166158	3.60895	2.29937	O23372	O23372	Histone-lysine N-methyltransferase ATXR3	ATXR3	912	sp|O23372|ATXR3_ARATH Histone-lysine N-methyltransferase ATXR3 OS=Arabidopsis thaliana OX=3702 GN=ATXR3 PE=2 SV=2	AT4G15180
24.9351	24.6954	NaN	26.3826	27.5654	27.3001	24.6383	27.2989	27.2873	27.0818	27.0913	25.8798					+	AP1_WT_ELUATE_AP1_WT_INPUT	26	26	22	35.2	35.2	31.6	114.26	0	216.3	10088000000	48	187	210170000	2.31003	0.021588	-1.70471	-3.70304	O23461	O23461	L-arabinokinase	ARA1	914	sp|O23461|ARAK_ARATH L-arabinokinase OS=Arabidopsis thaliana OX=3702 GN=ARA1 PE=1 SV=1	AT4G16130
28.6137	28.9487	27.7816	24.7676	25.6885	25.263	28.5504	25.2816	25.7458	24.8659	26.9123	28.9575				CAMTA	+	AP1_WT_ELUATE_AP1_WT_INPUT	25	25	25	40.8	40.8	40.8	104.85	0	137.16	10183000000	43	185	236810000	5.05039	0.000184791	3.0253	8.25831	O23463	O23463	Calmodulin-binding transcription activator 5	CMTA5	915	sp|O23463|CMTA5_ARATH Calmodulin-binding transcription activator 5 OS=Arabidopsis thaliana OX=3702 GN=CAMTA5 PE=2 SV=2	AT4G16150
33.3084	33.1197	33.2108	32.4762	32.181	32.2219	33.0446	31.8229	31.3362	32.0452	34.1053	33.1083					+	AP1_WT_ELUATE_AP1_WT_INPUT	14	14	14	47.1	47.1	47.1	24.239	0	301.25	576550000000	9	544	64062000000	3.6972	0.00165064	1.3023	5.69085	O23515;Q8VYF1	O23515;Q8VYF1	60S ribosomal protein L15-1;60S ribosomal protein L15-2	RPL15A;RPL15B	919	sp|O23515|RL151_ARATH 60S ribosomal protein L15-1 OS=Arabidopsis thaliana OX=3702 GN=RPL15A PE=2 SV=1;sp|Q8VYF1|RL152_ARATH 60S ribosomal protein L15-2 OS=Arabidopsis thaliana OX=3702 GN=RPL15B PE=2 SV=1	AT4G16720;AT4G17390
25.7351	24.8504	NaN	22.9331	21.9681	24.6573	26.4769	24.753	25.0304	24.5983	25.1059	25.7175							8	8	8	41	41	41	34.433	0	33.775	3240500000	11	40	294590000	1.52724	0.0968897	1.58716	2.57993	O23550	O23550		dl4560c	921	sp|O23550|FRIP2_ARATH Protein FIP2 OS=Arabidopsis thaliana OX=3702 GN=FIP2 PE=1 SV=1	AT4G17060
25.3738	NaN	NaN	26.7576	27.2932	27.1999	25.8091	27.0795	27.3186	26.9479	26.8677	25.8236					+	AP1_WT_ELUATE_AP1_WT_INPUT	29	29	29	44.4	44.4	44.4	81.943	0	150.16	10267000000	43	174	238760000	2.47744	0.0155665	-1.1309	-4.12289	O23627;F4J376	O23627	Glycine--tRNA ligase 1, mitochondrial	GLYRS-1	929	sp|O23627|SYGM1_ARATH Glycine--tRNA ligase, mitochondrial 1 OS=Arabidopsis thaliana OX=3702 GN=At1g29880 PE=1 SV=1	AT1G29880
28.1591	28.5469	28.0966	32.8455	32.7436	32.4315	28.8787	32.693	32.4695	32.3323	30.0828	29.3893					+	AP1_WT_ELUATE_AP1_WT_INPUT	52	52	52	89.2	89.2	89.2	68.812	0	323.31	402840000000	38	1548	10601000000	6.35956	2.65468e-05	-3.72699	-11.4958	O23654	O23654	V-type proton ATPase catalytic subunit A	VHA-A	932	sp|O23654|VATA_ARATH V-type proton ATPase catalytic subunit A OS=Arabidopsis thaliana OX=3702 GN=VHA-A PE=1 SV=1	AT1G78900
24.0915	24.8389	NaN	25.1924	26.0969	25.387	NaN	25.2979	26.1462	25.6175	NaN	25.432							8	8	8	46.2	46.2	46.2	23.53	0	43.87	3912000000	14	44	279430000	1.30118	0.153051	-0.835515	-2.36486	O23657;O49841	O23657	Ras-related protein RABC1	RABC1	933	sp|O23657|RABC1_ARATH Ras-related protein RABC1 OS=Arabidopsis thaliana OX=3702 GN=RABC1 PE=1 SV=1	AT1G43890
NaN	NaN	NaN	22.2299	22.7906	23.4754	NaN	23.058	23.9591	24.4569	22.9533	22.0118							9	9	8	46.6	46.6	44.1	43.617	0	44.331	1078000000	17	33	63414000	0.627944	0.574718	-0.845758	-1.31816	O23674	O23674	Type III polyketide synthase A	PKSA	934	sp|O23674|PKSA_ARATH Type III polyketide synthase A OS=Arabidopsis thaliana OX=3702 GN=PKSA PE=1 SV=1	AT1G02050
24.2646	NaN	NaN	29.0219	28.5271	28.6112	NaN	28.5633	28.2117	28.8225	25.5493	25.3048					+	AP1_WT_ELUATE_AP1_WT_INPUT	14	14	14	77.3	77.3	77.3	17.458	0	323.31	39992000000	10	186	3999200000	5.12724	0.000167238	-3.58671	-11.7173	O23676	O23676	Protein mago nashi homolog		935	sp|O23676|MGN_ARATH Protein mago nashi homolog OS=Arabidopsis thaliana OX=3702 GN=MAGO PE=1 SV=1	AT1G02140
25.9142	25.2345	25.5618	28.0799	27.4446	27.9855	26.222	27.8701	27.9145	27.3307	26.4558	25.7491					+	AP1_WT_ELUATE_AP1_WT_INPUT	11	11	11	55.6	55.6	55.6	32.925	0	167.96	15589000000	15	105	1039200000	5.2505	0.000139327	-1.91467	-8.69825	O23680	O23680	Translocase of chloroplast 33, chloroplastic	TOC33	936	sp|O23680|TOC33_ARATH Translocase of chloroplast 33, chloroplastic OS=Arabidopsis thaliana OX=3702 GN=TOC33 PE=1 SV=1	AT1G02280
25.032	25.782	NaN	26.501	26.068	25.9259	26.5392	26.3462	25.9329	26.1972	26.5935	26.5499							18	18	18	42.6	42.6	42.6	70.149	0	117.87	7632800000	28	111	272600000	0.0771302	1	-0.0625333	-0.211408	O23702	O23702	C-terminal binding protein AN	AN	937	sp|O23702|CTBP_ARATH C-terminal binding protein AN OS=Arabidopsis thaliana OX=3702 GN=AN PE=1 SV=1	AT1G01510
25.9461	NaN	NaN	26.7676	27.0431	27.1136	24.4741	27.567	27.3491	27.6925	26.4306	25.5856					+	AP1_WT_ELUATE_AP1_WT_INPUT	10	10	10	49.8	49.8	49.8	25.733	0	74.423	12844000000	13	146	987970000	2.64595	0.0114267	-1.64637	-4.40891	Q8L4A7;O23708	Q8L4A7;O23708	Proteasome subunit alpha type-2-B;Proteasome subunit alpha type-2-A	PAB2;PAB1	938	sp|Q8L4A7|PSA2B_ARATH Proteasome subunit alpha type-2-B OS=Arabidopsis thaliana OX=3702 GN=PAB2 PE=1 SV=1;sp|O23708|PSA2A_ARATH Proteasome subunit alpha type-2-A OS=Arabidopsis thaliana OX=3702 GN=PAB1 PE=1 SV=1	AT1G16470;AT1G79210
26.3389	NaN	NaN	27.0827	27.6736	27.4059	NaN	27.2407	27.2886	26.9848	26.4269	26.2011					+	AP1_WT_ELUATE_AP1_WT_INPUT	9	9	9	32.2	32.2	32.2	29.555	0	124.81	10884000000	12	63	906960000	3.38854	0.00289439	-0.957098	-6.28829	O23710;Q7DLS1	O23710;Q7DLS1	Proteasome subunit beta type-7-A;Proteasome subunit beta type-7-B	PBB1;PBB2	939	sp|O23710|PSB7A_ARATH Proteasome subunit beta type-7-A OS=Arabidopsis thaliana OX=3702 GN=PBB1 PE=1 SV=2;sp|Q7DLS1|PSB7B_ARATH Proteasome subunit beta type-7-B OS=Arabidopsis thaliana OX=3702 GN=PBB2 PE=1 SV=2	AT3G27430;AT5G40580
25.9094	NaN	NaN	27.6061	28.7446	28.3945	25.5667	28.5354	28.1149	27.953	25.7725	26.1515					+	AP1_WT_ELUATE_AP1_WT_INPUT	16	16	16	68.3	68.3	68.3	27.377	0	98.196	21619000000	16	144	1351200000	5.12894	0.000167238	-2.37471	-10.1795	O23715	O23715	Proteasome subunit alpha type-3	PAG1	941	sp|O23715|PSA3_ARATH Proteasome subunit alpha type-3 OS=Arabidopsis thaliana OX=3702 GN=PAG1 PE=1 SV=2	AT2G27020
NaN	26.3551	26.3523	27.8252	27.9779	27.7833	25.7124	27.1338	26.8446	26.8622	26.7642	26.0445					+	AP1_WT_ELUATE_AP1_WT_INPUT	10	10	5	54	54	33.9	29.667	0	323.31	14056000000	13	102	1081200000	2.58162	0.0129237	-1.15882	-4.11421	O23717	O23717	Proteasome subunit beta type-5-A	PBE1	942	sp|O23717|PSB5A_ARATH Proteasome subunit beta type-5-A OS=Arabidopsis thaliana OX=3702 GN=PBE1 PE=1 SV=1	AT1G13060
29.3073	29.1319	29.5418	31.5162	31.7832	31.5334	29.2255	31.5445	31.4551	31.4951	30.1383	29.8286					+	AP1_WT_ELUATE_AP1_WT_INPUT	25	25	20	76.8	76.8	65.1	35.747	0	323.31	226300000000	20	813	11315000000	6.59979	1.84822e-05	-2.02569	-12.1935	O24456	O24456	Receptor for activated C kinase 1A	RACK1A	946	sp|O24456|GBLPA_ARATH Receptor for activated C kinase 1A OS=Arabidopsis thaliana OX=3702 GN=RACK1A PE=1 SV=2	AT1G18080
NaN	NaN	NaN	27.6885	28.0752	27.3801	NaN	27.4424	26.915	26.9838	25.5158	25.5659					+	AP1_WT_ELUATE_AP1_WT_INPUT	17	17	17	44.9	44.9	44.9	47.173	0	85.158	12502000000	24	112	520900000	2.92576	0.0067209	-1.87327	-5.76671	O24457	O24457	Pyruvate dehydrogenase E1 component subunit alpha-3, chloroplastic	PDH-E1 ALPHA	947	sp|O24457|ODPA3_ARATH Pyruvate dehydrogenase E1 component subunit alpha-3, chloroplastic OS=Arabidopsis thaliana OX=3702 GN=PDH-E1 ALPHA PE=2 SV=1	AT1G01090
23.1435	NaN	NaN	22.4271	22.1439	22.9146	24.3381	22.518	22.0481	22.1716	24.3002	24.1132					+	AP1_WT_ELUATE_AP1_WT_INPUT	19	19	19	23.4	23.4	23.4	144.74	0	62.247	1276500000	72	47	17729000	3.39532	0.00286938	1.60319	5.80596	O24610	O24610		dl3985w	951	tr|O24610|O24610_ARATH Condensin-2 complex subunit OS=Arabidopsis thaliana OX=3702 GN=dl3985w PE=1 SV=2	AT4G15890
NaN	NaN	NaN	25.7886	26.151	25.6315	NaN	25.6377	26.0172	25.8127	25.9691	25.0574							9	9	3	53.8	53.8	18.1	21.984	0	28.728	5168100000	12	44	430680000	0.578734	0.632809	-0.326522	-1.2327	O24633	O24633	Proteasome subunit beta type-2-B	PBD2	954	sp|O24633|PSB2B_ARATH Proteasome subunit beta type-2-B OS=Arabidopsis thaliana OX=3702 GN=PBD2 PE=1 SV=1	AT4G14800
24.7149	NaN	NaN	26.5491	27.6214	27.0708	23.7635	27.4868	27.1201	27.4523	26.7595	26.7919							19	17	11	59	53.4	36.3	49.538	0	153.17	10221000000	23	134	444390000	1.57214	0.0889654	-1.70929	-2.70698	O24653	O24653	Guanosine nucleotide diphosphate dissociation inhibitor 2	GDI2	956	sp|O24653|GDI2_ARATH Guanosine nucleotide diphosphate dissociation inhibitor 2 OS=Arabidopsis thaliana OX=3702 GN=GDI2 PE=2 SV=1	AT3G59920
25.5882	24.9843	25.4448	26.6721	26.5625	26.795	25.4299	26.9338	26.9158	26.4069	25.1372	25.5338					+	AP1_WT_ELUATE_AP1_WT_INPUT	4	4	4	35.2	35.2	35.2	16.999	0	10.189	7622400000	8	47	952800000	6.01285	4.37615e-05	-1.36132	-10.5502	O48528	O48528	Outer envelope pore protein 16-3, chloroplastic/mitochondrial	OEP163	958	sp|O48528|OP163_ARATH Outer envelope pore protein 16-3, chloroplastic/mitochondrial OS=Arabidopsis thaliana OX=3702 GN=OEP163 PE=1 SV=1	AT2G42210
28.7867	28.4503	27.8781	28.3926	28.5247	28.3595	27.8092	29.1658	28.4718	28.958	30.1828	28.6222							14	4	4	41.6	14	14	28.367	0	102.54	53064000000	10	118	5306400000	0.0219121	1	-0.0238587	-0.0632716	O48549	O48549	40S ribosomal protein S6-1	RPS6A	961	sp|O48549|RS61_ARATH 40S ribosomal protein S6-1 OS=Arabidopsis thaliana OX=3702 GN=RPS6A PE=1 SV=2	AT4G31700
24.8083	NaN	NaN	27.0558	26.8893	27.0017	NaN	27.2265	27.4065	26.9478	24.6298	24.8874					+	AP1_WT_ELUATE_AP1_WT_INPUT	4	4	3	22.1	22.1	16.9	22.418	0	43.232	8121900000	8	51	1015200000	6.44686	2.27742e-05	-2.31274	-18.3216	O48671	O48671	Protein RER1B	RER1B	965	sp|O48671|RER1B_ARATH Protein RER1B OS=Arabidopsis thaliana OX=3702 GN=RER1B PE=1 SV=2	AT2G21600
NaN	NaN	NaN	22.43	24.3376	24.3745	NaN	21.7433	24.4997	21.7914	25.5084	24.8998							3	3	3	21.6	21.6	21.6	25.068	0	16.609	1977200000	11	35	179740000	1.02281	0.261506	2.00803	1.98107	O48691;Q9T0D0;A0A1P8BFU6	O48691;Q9T0D0;A0A1P8BFU6		F3I6.17;At4g11630	966	tr|O48691|O48691_ARATH At1g24240/F3I6_17 OS=Arabidopsis thaliana OX=3702 GN=At1g24240 PE=1 SV=1;tr|Q9T0D0|Q9T0D0_ARATH At4g11630 OS=Arabidopsis thaliana OX=3702 GN=At4g11630 PE=2 SV=1;tr|A0A1P8BFU6|A0A1P8BFU6_ARATH Ribosomal protein L19 family protein OS=A	AT1G24240;AT4G11630;AT5G11750
27.2636	27.012	27.0312	28.3871	27.7664	28.2714	28.349	27.4895	27.8605	27.6775	27.1104	27.1948							13	13	13	42.5	42.5	42.5	47.754	0	228.7	17044000000	18	169	946880000	1.3579	0.136001	-0.581916	-2.30522	O48773	O48773	Protein disulfide-isomerase 2-3	PDIL2-3	974	sp|O48773|PDI23_ARATH Protein disulfide-isomerase 2-3 OS=Arabidopsis thaliana OX=3702 GN=PDIL2-3 PE=2 SV=1	AT2G32920
28.1561	28.0936	28.7827	26.6	26.1073	26.4119	27.933	26.2389	25.6315	26.4471	28.6571	28.0829					+	AP1_WT_ELUATE_AP1_WT_INPUT	6	6	5	34.2	34.2	30.7	27.847	0	225.54	11652000000	8	123	1456500000	5.89687	5.22624e-05	2.04479	10.2491	O48818;Q9LZ99	O48818	Expansin-A4	EXPA4	980	sp|O48818|EXPA4_ARATH Expansin-A4 OS=Arabidopsis thaliana OX=3702 GN=EXPA4 PE=1 SV=1	AT2G39700
27.5661	27.3927	26.7761	28.8813	28.8669	28.8788	26.8014	28.5879	28.1839	28.5594	28.1014	28.1415					+	AP1_WT_ELUATE_AP1_WT_INPUT	34	34	18	47.8	47.8	28.3	108.98	0	270.47	40436000000	38	285	1064100000	2.90419	0.00698759	-1.19649	-4.44394	O48844	O48844	26S proteasome non-ATPase regulatory subunit 1 homolog A	RPN2A	981	sp|O48844|PSD1A_ARATH 26S proteasome non-ATPase regulatory subunit 1 homolog A OS=Arabidopsis thaliana OX=3702 GN=RPN2A PE=1 SV=1	AT2G32730
27.4651	26.9054	28.6811	25.3003	24.9542	25.293	28.5502	25.7507	26.309	26.9832	28.8556	28.0193					+	AP1_WT_ELUATE_AP1_WT_INPUT	15	15	15	36.6	36.6	36.6	85.514	0	323.31	6220400000	31	87	200660000	3.43021	0.00271678	2.3144	5.2538	O48847	O48847		LUH	983	sp|O48847|LUH_ARATH Transcriptional corepressor LEUNIG_HOMOLOG OS=Arabidopsis thaliana OX=3702 GN=LUH PE=1 SV=1	AT2G32700
25.5975	25.0431	NaN	27.7691	27.8366	27.6205	25.3723	28.0923	27.9623	27.518	26.1847	26.6867					+	AP1_WT_ELUATE_AP1_WT_INPUT	32	32	20	46.2	46.2	32.1	122.24	0	323.31	16463000000	50	170	329260000	4.27947	0.000623988	-2.02294	-7.1694	O48946	O48946	Cellulose synthase A catalytic subunit 1 [UDP-forming]	CESA1	986	sp|O48946|CESA1_ARATH Cellulose synthase A catalytic subunit 1 [UDP-forming] OS=Arabidopsis thaliana OX=3702 GN=CESA1 PE=1 SV=1	AT4G32410
NaN	25.3138	NaN	27.0046	26.7016	26.8875	NaN	26.8132	26.9125	26.6139	25.4034	25.3888					+	AP1_WT_ELUATE_AP1_WT_INPUT	4	4	4	17.5	17.5	17.5	25.146	0	62.545	8690600000	5	64	1738100000	6.13897	3.80504e-05	-1.45357	-16.5225	O48962	O48962	Probable 3-beta-hydroxysteroid-Delta(8),Delta(7)-isomerase		988	sp|O48962|EBP_ARATH Probable 3-beta-hydroxysteroid-Delta(8),Delta(7)-isomerase OS=Arabidopsis thaliana OX=3702 GN=At1g20050 PE=2 SV=1	AT1G20050
31.3453	31.1088	31.6364	30.635	30.1954	30.6809	30.6399	30.1301	30.3811	30.5355	32.0939	31.249					+	AP1_WT_ELUATE_AP1_WT_INPUT	23	23	22	53.4	53.4	52.2	64.255	0	323.31	157500000000	30	506	5249900000	2.70387	0.0101469	0.919202	4.15077	O49006;Q42534;O81301;Q84R10;O49298;Q9SRX4;Q9M3B0;Q94CB1	O49006	Pectinesterase/pectinesterase inhibitor 3;Pectinesterase inhibitor 3;Pectinesterase 3	PME3	989	sp|O49006|PME3_ARATH Pectinesterase/pectinesterase inhibitor 3 OS=Arabidopsis thaliana OX=3702 GN=PME3 PE=1 SV=2	AT3G14310
27.923	26.2498	25.439	29.5972	29.5315	29.5749	27.5622	29.4094	29.3211	29.234	28.7805	28.4736					+	AP1_WT_ELUATE_AP1_WT_INPUT	45	45	41	53.8	53.8	52.3	102.95	0	323.31	57426000000	48	578	1196400000	2.4593	0.0161403	-2.03999	-3.80226	O49160;Q9FLQ7	O49160	Eukaryotic translation initiation factor 3 subunit C	TIF3C1	991	sp|O49160|EIF3C_ARATH Eukaryotic translation initiation factor 3 subunit C OS=Arabidopsis thaliana OX=3702 GN=TIF3C1 PE=1 SV=2	AT3G56150
31.1403	31.504	32.8199	32.0607	31.838	31.9757	32.5759	31.9514	31.4348	32.4874	32.6264	32.1675							14	14	8	46.7	46.7	30.7	30.261	0	323.31	474410000000	10	948	47441000000	0.242893	1	0.180975	0.584833	O49195	O49195	Vegetative storage protein 1	VSP1	992	sp|O49195|VSP1_ARATH Vegetative storage protein 1 OS=Arabidopsis thaliana OX=3702 GN=VSP1 PE=1 SV=2	AT5G24780
NaN	NaN	NaN	27.8394	28.1624	28.4923	NaN	28.3549	28.851	28.3276	25.4672	26.1464					+	AP1_WT_ELUATE_AP1_WT_INPUT	9	9	4	38.7	38.7	26.5	25.734	0	35.394	19231000000	14	87	1373600000	3.83914	0.00129176	-2.53112	-8.50312	O49203	O49203	Nucleoside diphosphate kinase III, chloroplastic/mitochondrial	NDPK3	993	sp|O49203|NDK3_ARATH Nucleoside diphosphate kinase III, chloroplastic/mitochondrial OS=Arabidopsis thaliana OX=3702 GN=NDPK3 PE=1 SV=1	AT4G11010
27.4914	27.5322	NaN	25.4839	25.3661	24.9073	27.049	25.7219	25.8146	25.8096	25.9376	26.7249					+	AP1_WT_ELUATE_AP1_WT_INPUT	21	21	21	33.4	33.4	33.4	93.502	0	261.31	8089500000	41	189	197300000	2.91473	0.00683844	1.42979	4.64134	O49289	O49289	Putative DEAD-box ATP-dependent RNA helicase 29	RH29	994	sp|O49289|RH29_ARATH Putative DEAD-box ATP-dependent RNA helicase 29 OS=Arabidopsis thaliana OX=3702 GN=RH29 PE=3 SV=1	AT1G77030
26.3869	26.6499	25.2105	27.728	28.8528	27.961	26.332	27.6534	28.8469	27.9254	28.0346	27.3398					+	AP1_WT_ELUATE_AP1_WT_INPUT	29	29	18	69	69	44.9	63.17	0	175.06	16028000000	36	184	445230000	2.11435	0.0313156	-1.50231	-3.3248	O49299	O49299	Probable phosphoglucomutase, cytoplasmic 1		995	sp|O49299|PGMC1_ARATH Probable phosphoglucomutase, cytoplasmic 1 OS=Arabidopsis thaliana OX=3702 GN=At1g23190 PE=2 SV=2	AT1G23190
NaN	NaN	NaN	28.4709	27.3109	27.6242	24.3301	27.6841	27.5241	27.5202	23.8634	NaN					+	AP1_WT_ELUATE_AP1_WT_INPUT	9	9	4	55.2	55.2	14.7	16.121	0	65.202	13706000000	7	112	1958000000	4.52299	0.000420492	-3.59232	-11.2165	O49313	O49313	NADH dehydrogenase [ubiquinone] 1 alpha subcomplex subunit 13-B		996	sp|O49313|NDADB_ARATH NADH dehydrogenase [ubiquinone] 1 alpha subcomplex subunit 13-B OS=Arabidopsis thaliana OX=3702 GN=At2g33220 PE=2 SV=1	AT2G33220
NaN	24.5084	NaN	23.0911	23.5106	24.2325	24.5536	24.3122	25.0794	24.5031	NaN	NaN							9	7	7	42.8	37.9	37.9	38.191	0	89.918	2421100000	16	44	151320000	0.327236	1	0.409489	0.769633	O49457;Q9SIL3;Q9SIL4	O49457		F20O9.160	1003	tr|O49457|O49457_ARATH DNAJ heat shock family protein OS=Arabidopsis thaliana OX=3702 GN=At4g28480 PE=1 SV=1	AT4G28480
NaN	NaN	NaN	27.361	27.5405	27.7648	25.0436	27.0773	27.957	27.5489	25.0062	25.0801					+	AP1_WT_ELUATE_AP1_WT_INPUT	10	8	7	48.6	40.3	36.5	31.706	0	59.635	12547000000	15	88	836450000	5.5604	8.6731e-05	-2.49833	-13.587	O49460	O49460	Prohibitin-1, mitochondrial	PHB1	1004	sp|O49460|PHB1_ARATH Prohibitin-1, mitochondrial OS=Arabidopsis thaliana OX=3702 GN=PHB1 PE=1 SV=1	AT4G28510
NaN	NaN	NaN	26.6101	28.145	27.8027	26.0813	27.9348	27.1854	27.2009	26.5636	26.5433							22	22	18	55.9	55.9	49.4	63.324	0	249.87	13728000000	29	173	473360000	1.70196	0.0693302	-1.08374	-3.00281	O49485	O49485	D-3-phosphoglycerate dehydrogenase 1, chloroplastic	PGDH1	1005	sp|O49485|SERA1_ARATH D-3-phosphoglycerate dehydrogenase 1, chloroplastic OS=Arabidopsis thaliana OX=3702 GN=PGDH1 PE=1 SV=1	AT4G34200
NaN	NaN	NaN	23.0931	23.5008	22.9475	NaN	22.6643	23.5297	21.6834	24.5936	23.9653							10	10	10	56	56	56	29.155	0	32.752	907230000	15	41	60482000	1.38834	0.12793	1.37629	2.59577	O49499	O49499	Caffeoyl-CoA O-methyltransferase 1	CCOAOMT1	1006	sp|O49499|CAMT4_ARATH Caffeoyl-CoA O-methyltransferase 1 OS=Arabidopsis thaliana OX=3702 GN=CCOAOMT1 PE=1 SV=1	AT4G34050
25.9317	25.7859	NaN	25.0839	26.2091	25.8353	27.5186	25.2411	25.2097	25.3831	27.4896	26.5195							13	13	13	47.7	47.7	47.7	50.295	0	131.31	5071600000	27	42	187840000	1.81031	0.0563196	1.15533	2.9789	O49543	O49543	Cysteine desulfurase, mitochondrial	NIFS1	1009	sp|O49543|MNIF1_ARATH Cysteine desulfurase, mitochondrial OS=Arabidopsis thaliana OX=3702 GN=NIFS1 PE=1 SV=1	AT5G65720
25.9119	26.0647	NaN	26.3459	25.556	25.5688	25.6518	25.8148	25.7942	25.6693	25.3578	25.6038							13	13	7	18.8	18.8	10.4	109.2	0	49.531	6281300000	48	69	130860000	0.167202	1	-0.0735258	-0.425518	O49545	O49545	Leucine-rich repeat receptor-like serine/threonine-protein kinase BAM1	BAM1	1010	sp|O49545|BAME1_ARATH Leucine-rich repeat receptor-like serine/threonine-protein kinase BAM1 OS=Arabidopsis thaliana OX=3702 GN=BAM1 PE=1 SV=1	AT5G65700
NaN	NaN	NaN	24.3898	23.7502	23.4283	NaN	24.0388	22.9557	24.2651	24.8721	24.1277							18	8	8	21.3	10.2	10.2	121.18	0	60.985	1730400000	49	46	35314000	0.779664	0.427664	0.695282	1.57604	O49552	O49552	DNA damage-binding protein 1b	DDB1B	1011	sp|O49552|DDB1B_ARATH DNA damage-binding protein 1b OS=Arabidopsis thaliana OX=3702 GN=DDB1B PE=1 SV=2	AT4G21100
NaN	NaN	NaN	27.0322	26.468	26.4746	24.3142	27.277	26.9926	27.4217	24.086	NaN					+	AP1_WT_ELUATE_AP1_WT_INPUT	8	8	8	51	51	51	17.187	0	130.75	12164000000	7	116	1737800000	3.99919	0.000978981	-2.74424	-9.07934	O49553	O49553		F7J7.50	1012	tr|O49553|O49553_ARATH AT4g21110/F7J7_50 OS=Arabidopsis thaliana OX=3702 GN=At4g21110 PE=1 SV=1	AT4G21110
32.5576	32.7385	33.2299	30.0271	29.9817	29.7745	32.4921	30.2484	29.9584	30.3156	32.6503	32.3569					+	AP1_WT_ELUATE_AP1_WT_INPUT	36	36	36	67.1	67.1	67.1	81.045	0	323.31	149820000000	36	1276	4161700000	8.14165	4.34508e-06	2.61993	17.66	O49607	O49607	Subtilisin-like protease SBT1.6	SBT1.6	1015	sp|O49607|SBT16_ARATH Subtilisin-like protease SBT1.6 OS=Arabidopsis thaliana OX=3702 GN=SBT1.6 PE=2 SV=1	AT4G34980
30.6842	30.7754	30.6039	31.2707	31.9017	31.5805	30.6178	31.6209	31.9106	31.7341	31.8833	31.5355							51	51	26	72.3	72.3	42.4	84.356	0	323.31	239750000000	38	1346	6309100000	1.62405	0.0812611	-0.653069	-2.66326	O50008	O50008	5-methyltetrahydropteroyltriglutamate--homocysteine methyltransferase 1	MS1	1021	sp|O50008|METE1_ARATH 5-methyltetrahydropteroyltriglutamate--homocysteine methyltransferase 1 OS=Arabidopsis thaliana OX=3702 GN=MS1 PE=1 SV=1	AT5G17920
28.8157	27.1974	25.1852	27.3235	27.0486	27.281	28.1243	27.7299	29.0404	27.8921	30.0567	27.9604							13	13	13	44.7	44.7	44.7	30.558	0	90.618	35669000000	14	202	2547800000	0.0862804	1	0.170676	0.233846	O50061	O50061	50S ribosomal protein L4, chloroplastic	RPL4	1022	sp|O50061|RK4_ARATH 50S ribosomal protein L4, chloroplastic OS=Arabidopsis thaliana OX=3702 GN=RPL4 PE=2 SV=2	AT1G07320
27.2898	26.7357	27.4038	28.1684	28.3179	28.4489	26.3831	27.9807	27.7466	27.5252	27.6034	27.5696					+	AP1_WT_ELUATE_AP1_WT_INPUT	20	20	20	53.5	53.5	53.5	50.853	0	323.31	23929000000	19	159	1259400000	2.2433	0.0245036	-0.867035	-3.50164	O64490;F4JQU1;F4IRF5	O64490		F20D22.6	1029	tr|O64490|O64490_ARATH Protein-synthesizing GTPase OS=Arabidopsis thaliana OX=3702 GN=EIF2 GAMMA PE=1 SV=1	AT1G04170
NaN	25.8485	28.3043	29.7953	29.9917	29.798	26.8305	30.4348	30.5532	30.2338	27.6495	27.4235					+	AP1_WT_ELUATE_AP1_WT_INPUT	14	14	14	73	73	73	17.164	0	294.24	104020000000	10	212	10402000000	4.33115	0.000573479	-2.92319	-7.27971	O64644	O64644	Histone deacetylase complex subunit SAP18		1035	sp|O64644|SAP18_ARATH Histone deacetylase complex subunit SAP18 OS=Arabidopsis thaliana OX=3702 GN=At2g45640 PE=1 SV=1	AT2G45640
29.5765	28.8104	29.1149	22.0849	21.5039	22.7437	29.8218	22.5931	22.3683	23.5614	28.0978	28.5098				MIKC_MADS	+	AP1_WT_ELUATE_AP1_WT_INPUT	12	12	12	51.9	51.9	51.9	24.533	0	323.31	6305600000	12	108	525470000	7.94303	4.34508e-06	6.51265	16.8469	O64645	O64645	MADS-box protein SOC1	SOC1	1036	sp|O64645|SOC1_ARATH MADS-box protein SOC1 OS=Arabidopsis thaliana OX=3702 GN=SOC1 PE=1 SV=1	AT2G45660
28.3821	28.4417	29.0653	28.656	28.5372	28.5518	28.5692	28.7013	29.0382	28.4953	28.8013	28.7246							5	5	3	46.5	46.5	30.2	9.6001	0	214.66	34329000000	3	180	11443000000	0.00187346	1	0.000728289	0.00553129	Q9M2F1;O64650;B3H5X2	Q9M2F1;O64650	40S ribosomal protein S27-2;40S ribosomal protein S27-1	RPS27B;RPS27A	1038	sp|Q9M2F1|RS272_ARATH 40S ribosomal protein S27-2 OS=Arabidopsis thaliana OX=3702 GN=RPS27B PE=2 SV=2;sp|O64650|RS271_ARATH 40S ribosomal protein S27-1 OS=Arabidopsis thaliana OX=3702 GN=RPS27A PE=3 SV=1	AT2G45710;AT3G61110
27.5413	27.6883	NaN	26.6803	26.5583	27.1822	27.0415	26.9098	27.1276	26.773	27.8551	27.4768					+	AP1_WT_ELUATE_AP1_WT_INPUT	14	14	14	56.7	56.7	56.7	30.082	0	52.865	4597100000	17	56	270420000	2.44004	0.0168163	0.64873	3.898	O64700	O64700	Urease accessory protein G	UREG	1040	sp|O64700|UREG_ARATH Urease accessory protein G OS=Arabidopsis thaliana OX=3702 GN=UREG PE=2 SV=1	AT2G34470
NaN	NaN	NaN	25.5659	26.0301	25.5048	NaN	25.6855	25.8591	25.6297	25.9575	25.4783							10	10	9	54.6	54.6	50.7	32.642	0	38.238	5485900000	17	52	322700000	0.00975366	1	0.00538031	0.0290176	O64740	O64740	Protein transport protein SEC13 homolog B	SEC13B	1042	sp|O64740|SC13B_ARATH Protein transport protein SEC13 homolog B OS=Arabidopsis thaliana OX=3702 GN=SEC13B PE=1 SV=1	AT2G30050
27.3938	24.9888	26.8232	29.2049	28.651	29.5384	26.9062	28.0965	28.8411	28.8901	27.5248	27.7081					+	AP1_WT_ELUATE_AP1_WT_INPUT	31	31	31	63	63	63	61.306	0	172.42	46650000000	31	310	1504800000	2.85507	0.00766055	-1.97948	-4.37135	O64745;Q9FZC8;Q9FZC5;Q9FZC4	O64745		At2g34810	1043	sp|O64745|BBE16_ARATH Berberine bridge enzyme-like 16 OS=Arabidopsis thaliana OX=3702 GN=At2g34810 PE=2 SV=1	AT2G34810
NaN	25.0034	NaN	24.0829	25.3619	24.9114	25.5029	25.6346	25.3349	25.3715	25.6126	25.2132							13	13	13	24.7	24.7	24.7	81.863	0	41.359	3599200000	36	48	99977000	0.303795	1	0.216829	0.711784	O64760;Q9SRU3	O64760		At2g34970	1044	tr|O64760|O64760_ARATH eIF-2B GDP-GTP exchange factor subunit epsilon OS=Arabidopsis thaliana OX=3702 GN=At2g34970 PE=1 SV=1	AT2G34970
26.2296	25.8267	25.8315	25.7917	25.3616	25.5496	26.3129	25.374	25.4322	25.7095	25.5152	25.9846							15	11	11	35.9	25.5	25.5	50.236	0	44.515	5582200000	22	87	253740000	1.833	0.0538729	0.413684	2.94382	O64816	O64816	Casein kinase II subunit alpha, chloroplastic		1048	sp|O64816|CSK2P_ARATH Casein kinase II subunit alpha-4, chloroplastic OS=Arabidopsis thaliana OX=3702 GN=CKA4 PE=2 SV=1	AT2G23070
27.9258	27.9415	27.3751	24.7194	25.4064	23.936	27.6069	24.6297	23.7995	24.9809	26.2752	26.9514					+	AP1_WT_ELUATE_AP1_WT_INPUT	30	30	30	30.3	30.3	30.3	155.77	0	88.196	4941800000	65	134	76028000	4.74753	0.00030468	2.76734	7.62503	O64827	O64827	Histone-lysine N-methyltransferase SUVR5	SUVR5	1049	sp|O64827|SUVR5_ARATH Histone-lysine N-methyltransferase SUVR5 OS=Arabidopsis thaliana OX=3702 GN=SUVR5 PE=1 SV=3	AT2G23740
26.2917	26.4078	27.0986	27.1805	27.3093	27.5042	27.4804	27.3935	27.837	27.3857	26.9224	27.0421							19	19	13	68	68	57.9	42.624	0	241.91	15619000000	18	206	867710000	1.68311	0.0719251	-0.561206	-2.7425	O64888	O64888	Ribose-phosphate pyrophosphokinase 5, chloroplastic	PRS5	1053	sp|O64888|KPRS5_ARATH Ribose-phosphate pyrophosphokinase 5, chloroplastic OS=Arabidopsis thaliana OX=3702 GN=PRS5 PE=2 SV=2	AT2G44530
NaN	NaN	NaN	22.2933	22.3541	21.9432	21.9813	21.8215	21.2004	23.3721	23.0889	22.1418							2	2	2	4.4	4.4	4.4	97.861	0	10.255	100510000	52	16	1932800	0.195495	1	0.239888	0.492351	O64948	O64948	Lon protease homolog 2, peroxisomal	LON2	1054	sp|O64948|LONP2_ARATH Lon protease homolog 2, peroxisomal OS=Arabidopsis thaliana OX=3702 GN=LON2 PE=2 SV=1	AT5G47040
24.2082	24.5025	NaN	24.7592	24.7899	24.775	NaN	24.688	24.2736	24.4208	NaN	NaN							6	6	6	10.3	10.3	10.3	77.479	0	6.0308	2251100000	41	20	54906000	0.727473	0.473548	-0.26242	-1.48809	O65201	O65201	Acyl-coenzyme A oxidase 2, peroxisomal	ACX2	1056	sp|O65201|ACOX2_ARATH Acyl-coenzyme A oxidase 2, peroxisomal OS=Arabidopsis thaliana OX=3702 GN=ACX2 PE=1 SV=2	AT5G65110
NaN	NaN	NaN	26.0371	27.7738	26.1034	NaN	27.6029	26.7801	26.5802	25.3144	24.1857							15	15	12	31	31	24.4	74.301	0	109.28	7613000000	42	88	181260000	1.83007	0.054143	-2.06285	-3.38378	O65202	O65202	Peroxisomal acyl-coenzyme A oxidase 1	ACX1	1057	sp|O65202|ACOX1_ARATH Peroxisomal acyl-coenzyme A oxidase 1 OS=Arabidopsis thaliana OX=3702 GN=ACX1 PE=1 SV=1	AT4G16760
24.6874	NaN	NaN	25.4087	25.8092	25.293	NaN	25.753	25.4426	25.9838	25.5997	24.8862							11	11	11	31.6	31.6	31.6	79.414	0	68.034	3835500000	30	50	127850000	1.25346	0.167642	-0.5573	-2.29024	O65351	O65351	Subtilisin-like protease SBT1.7	SBT1.7	1061	sp|O65351|SBT17_ARATH Subtilisin-like protease SBT1.7 OS=Arabidopsis thaliana OX=3702 GN=SBT1.7 PE=1 SV=1	AT5G67360
25.7557	24.7246	NaN	26.2024	26.3564	26.0081	26.5905	25.9032	25.6756	25.9458	26.6768	25.9234							16	16	16	47.4	47.4	47.4	54.613	0	323.31	8635100000	24	174	359790000	0.089111	1	-0.0810392	-0.241612	O65390;Q8VYL3	O65390	Aspartic proteinase A1	APA1	1066	sp|O65390|APA1_ARATH Aspartic proteinase A1 OS=Arabidopsis thaliana OX=3702 GN=APA1 PE=1 SV=1	AT1G11910
25.8838	25.9956	25.9036	25.6484	25.8717	26.3248	26.054	25.9663	26.4133	26.0164	27.2376	27.1684							14	14	14	55.1	55.1	55.1	44.444	0	59.187	4684500000	22	72	212930000	0.562521	0.654069	0.333721	1.15786	O65396	O65396	Aminomethyltransferase, mitochondrial	GDCST	1067	sp|O65396|GCST_ARATH Aminomethyltransferase, mitochondrial OS=Arabidopsis thaliana OX=3702 GN=GDCST PE=2 SV=1	AT1G11860
25.0761	25.2433	NaN	26.0896	26.4705	25.8939	26.1838	25.4765	26.4734	26.283	27.7131	26.9822							13	13	13	44.2	44.2	44.2	31.928	0	71.153	6889800000	12	72	574150000	0.0954306	1	0.12521	0.257305	O65398;Q8W593	O65398	Lactoylglutathione lyase	F12F1.32	1068	sp|O65398|GLX1_ARATH Lactoylglutathione lyase GLX1 OS=Arabidopsis thaliana OX=3702 GN=GLX1 PE=1 SV=1	AT1G11840
NaN	NaN	24.0036	20.5207	22.0416	22.6484	24.1592	22.8718	22.3875	23.2984	23.4574	24.139				B3	+	AP1_WT_ELUATE_AP1_WT_INPUT	2	2	2	2.7	2.7	2.7	79.757	0.00038491	2.7867	215120000	41	5	5246800	1.91253	0.0463312	1.64504	3.22043	O65420	O65420	B3 domain-containing transcription factor VAL3	VAL3	1072	sp|O65420|VAL3_ARATH B3 domain-containing transcription factor VAL3 OS=Arabidopsis thaliana OX=3702 GN=VAL3 PE=4 SV=3	AT4G21550
31.4866	31.3344	31.7741	30.2293	30.0076	30.0903	31.5952	29.7181	29.5195	29.7913	32.162	31.5214					+	AP1_WT_ELUATE_AP1_WT_INPUT	31	31	29	64.7	64.7	61.7	60.455	0	323.31	106610000000	25	769	4264300000	6.16248	3.745e-05	1.75295	10.9498	O65449	O65449		sks4	1074	tr|O65449|O65449_ARATH At4g22010 OS=Arabidopsis thaliana OX=3702 GN=sks4 PE=1 SV=1	AT4G22010
27.1816	26.8412	25.9581	27.155	26.7136	26.8472	26.5782	26.6378	26.5137	26.4883	26.8682	26.6237							17	17	17	57.5	57.5	57.5	43.723	0	42.65	7484800000	25	132	299390000	0.0963328	1	-0.0507914	-0.258766	O65502	O65502		F23E12.190	1075	sp|O65502|HC244_ARATH Protein HIGH CHLOROPHYLL FLUORESCENCE PHENOTYPE 244, chloroplastic OS=Arabidopsis thaliana OX=3702 GN=HCF244 PE=1 SV=1	AT4G35250
NaN	NaN	NaN	20.967	24.9231	21.2676	NaN	24.9453	23.9747	24.7322	26.2956	25.7569							12	3	3	49.7	20.1	20.1	17.931	0	7.637	3110400000	9	29	345610000	0.937791	0.310501	2.55795	1.83986	O65569	O65569	40S ribosomal protein S11-2	RPS11B	1076	sp|O65569|RS112_ARATH 40S ribosomal protein S11-2 OS=Arabidopsis thaliana OX=3702 GN=RPS11B PE=2 SV=2	AT4G30800
NaN	NaN	NaN	24.0445	23.103	24.0289	NaN	21.892	24.533	24.4871	24.6936	24.1057							7	4	4	26	19.6	19.6	38.293	0	40.577	734680000	20	17	36734000	0.412318	0.888707	0.718197	0.932689	O65581	O65581	Fructose-bisphosphate aldolase	M3E9.40	1079	sp|O65581|ALFC5_ARATH Fructose-bisphosphate aldolase 5, cytosolic OS=Arabidopsis thaliana OX=3702 GN=FBA5 PE=1 SV=1	AT4G26530
NaN	NaN	NaN	29.1823	28.9644	29.3617	24.1212	29.143	29.0933	29.4342	24.0481	23.2299					+	AP1_WT_ELUATE_AP1_WT_INPUT	42	42	42	80.3	80.3	80.3	69.441	0	323.31	102480000000	37	693	2769800000	7.40521	7.60058e-06	-5.39675	-25.2198	O65655	O65655		At4g39680	1083	tr|O65655|O65655_ARATH SAP domain-containing protein OS=Arabidopsis thaliana OX=3702 GN=At4g39680 PE=1 SV=1	AT4G39680
24.877	NaN	NaN	23.8828	23.4052	24.7777	NaN	24.5389	24.9286	24.0754	24.6717	NaN							5	5	5	50.4	50.4	50.4	12.699	0	72.906	2580800000	6	52	430130000	0.536208	0.690985	0.506242	1.15784	O65686	O65686		T4L20.200	1087	sp|O65686|RS16A_ARATH 30S ribosomal protein S16-1, chloroplastic OS=Arabidopsis thaliana OX=3702 GN=RPS16-1 PE=2 SV=1	AT4G34620
28.3807	28.3947	28.7369	29.3382	29.4469	29.2549	28.5265	29.4656	29.4665	29.3706	28.7963	28.6591					+	AP1_WT_ELUATE_AP1_WT_INPUT	50	24	23	79.2	40.8	36.8	71.147	0	323.31	60561000000	37	542	1636800000	5.85278	5.55055e-05	-0.80807	-10.1366	O65719	O65719	Heat shock 70 kDa protein 3	HSP70-3	1090	sp|O65719|HSP7C_ARATH Heat shock 70 kDa protein 3 OS=Arabidopsis thaliana OX=3702 GN=HSP70-3 PE=1 SV=1	AT3G09440
29.3879	29.9038	30.3149	29.1142	29.2417	29.3346	29.3596	29.1017	28.8955	29.0898	29.2487	29.3999							33	33	33	65.5	65.5	65.5	56.138	0	151.27	39286000000	31	409	1267300000	1.58743	0.0867825	0.472887	2.61413	O80437;Q9CAY3	O80437	Glycerol-3-phosphate 2-O-acyltransferase 6	GPAT6	1098	sp|O80437|GPAT6_ARATH Glycerol-3-phosphate 2-O-acyltransferase 6 OS=Arabidopsis thaliana OX=3702 GN=GPAT6 PE=1 SV=1	AT2G38110
25.5796	NaN	25.3007	25.8471	21.746	20.7959	NaN	26.5953	26.7236	26.3123	26.7615	26.7497							6	6	6	28	28	28	12.783	0	10.276	10258000000	5	40	2051600000	0.473877	0.786059	1.42783	1.02393	O80439	O80439	30S ribosomal protein S31, chloroplastic	RPS31	1099	sp|O80439|RR31_ARATH 30S ribosomal protein S31, chloroplastic OS=Arabidopsis thaliana OX=3702 GN=RPS31 PE=1 SV=1	AT2G38140
NaN	NaN	NaN	25.5391	25.4204	25.3385	NaN	25.2935	25.2594	25.5687	25.4664	25.1952							11	9	9	33.6	29	29	59.445	0	52.345	4113300000	24	36	171390000	0.25717	1	-0.0724672	-0.62801	O80480	O80480	Importin subunit alpha-4	IMPA4	1102	sp|O80480|IMPA4_ARATH Importin subunit alpha-4 OS=Arabidopsis thaliana OX=3702 GN=IMPA4 PE=1 SV=1	AT1G09270
NaN	NaN	NaN	26.9844	27.5986	27.3248	NaN	27.3956	27.4157	27.2828	25.3857	25.782					+	AP1_WT_ELUATE_AP1_WT_INPUT	10	10	5	52.4	52.4	26	23.13	0	32.282	13402000000	14	95	957300000	4.20002	0.000705298	-1.74977	-9.85098	O80501;Q9LV79	O80501	Ras-related protein RABH1b	RABH1B	1104	sp|O80501|RAH1B_ARATH Ras-related protein RABH1b OS=Arabidopsis thaliana OX=3702 GN=RABH1B PE=1 SV=1	AT2G44610
26.7626	26.241	26.2306	29.7522	29.1093	29.5694	27.3655	29.2636	29.2068	28.8908	27.5432	27.5389					+	AP1_WT_ELUATE_AP1_WT_INPUT	25	25	25	69.6	69.6	69.6	49.83	0	323.31	45747000000	24	450	1906100000	5.06245	0.000183418	-2.35174	-8.28432	O80503	O80503		At2g44640	1105	tr|O80503|O80503_ARATH Expressed protein OS=Arabidopsis thaliana OX=3702 GN=At2g44640 PE=1 SV=2	AT2G44640
26.6958	26.6568	NaN	27.068	27.0522	26.4056	28.2191	26.9237	27.0662	27.2319	27.3415	26.8962				Trihelix			22	22	22	64.8	64.8	64.8	40.781	0	259.59	13946000000	17	129	820360000	0.297599	1	0.203934	0.696063	O80512	O80512		At2g44730	1106	tr|O80512|O80512_ARATH Alcohol dehydrogenase transcription factor Myb/SANT-like family protein OS=Arabidopsis thaliana OX=3702 GN=At2g44730 PE=1 SV=1	AT2G44730
26.8641	26.6241	27.2053	27.7626	27.6467	28.2179	26.3515	27.555	27.6118	27.4155	26.6007	26.8746					+	AP1_WT_ELUATE_AP1_WT_INPUT	14	14	14	54.8	54.8	54.8	38.835	0	114.96	16369000000	17	167	962860000	3.72922	0.00156713	-0.948213	-5.74458	O80565	O80565	Outer envelope pore protein 37, chloroplastic	OEP37	1110	sp|O80565|OEP37_ARATH Outer envelope pore protein 37, chloroplastic OS=Arabidopsis thaliana OX=3702 GN=OEP37 PE=2 SV=2	AT2G43950
26.1619	26.5861	26.4895	26.7149	26.7717	26.3486	26.5995	26.4355	26.062	26.0684	27.749	26.9778							15	15	15	60.9	60.9	60.9	36.036	0	108.67	8991300000	23	168	390930000	0.7198	0.480055	0.36047	1.4039	O80576	O80576		At2g44060	1114	tr|O80576|O80576_ARATH At2g44060 OS=Arabidopsis thaliana OX=3702 GN=late embryogenesis abundant 26 PE=1 SV=1	AT2G44060
NaN	NaN	NaN	25.6024	25.6716	25.8383	NaN	25.7414	25.9742	25.8606	26.7443	26.827					+	AP1_WT_ELUATE_AP1_WT_INPUT	21	15	15	42.6	32.7	32.7	66.801	0	59.06	4834300000	36	67	134290000	4.17041	0.000739975	1.00423	9.73366	O80585	O80585	Methylenetetrahydrofolate reductase 2	MTHFR2	1115	sp|O80585|MTHR2_ARATH Methylenetetrahydrofolate reductase 2 OS=Arabidopsis thaliana OX=3702 GN=MTHFR2 PE=1 SV=2	AT2G44160
NaN	NaN	NaN	25.2985	24.6031	23.9303	24.8178	24.3576	22.3126	22.9404	26.1135	25.3842							2	2	2	11.9	11.9	11.9	27.076	0	28.811	2185900000	5	19	437170000	1.17922	0.192548	1.53144	2.17437	O80622	O80622	Expansin-A15	EXPA15	1116	sp|O80622|EXP15_ARATH Expansin-A15 OS=Arabidopsis thaliana OX=3702 GN=EXPA15 PE=2 SV=2	AT2G03090
28.4091	27.3038	28.9108	28.6115	28.0293	28.3186	28.8317	28.9198	28.7244	28.9929	27.2254	28.0722							24	24	24	48.8	48.8	48.8	69.422	0	323.31	47860000000	32	424	1495600000	0.727673	0.473548	-0.47391	-1.41583	O80653	O80653	SNW/SKI-interacting protein	SKIP	1117	sp|O80653|SKIP_ARATH SNW/SKI-interacting protein OS=Arabidopsis thaliana OX=3702 GN=SKIP PE=1 SV=1	AT1G77180
25.1854	24.8243	NaN	24.5649	23.8988	24.6434	24.7946	25.0333	24.4286	24.8354	25.2876	25.0245							15	15	15	47.6	47.6	47.6	46.248	0	70.27	2440600000	25	76	97624000	1.34101	0.140461	0.455858	2.31843	O80704	O80704		F8K4.18	1120	tr|O80704|O80704_ARATH At1g61990/F8K4_18 OS=Arabidopsis thaliana OX=3702 GN=At1g61990 PE=1 SV=1	AT1G61990
27.306	27.5286	24.2454	29.6402	29.7883	29.731	27.2638	29.8072	29.7968	29.8408	28.9616	28.1219					+	AP1_WT_ELUATE_AP1_WT_INPUT	19	19	19	33.9	33.9	33.9	52.097	0	150.65	69187000000	15	314	4612500000	2.50659	0.0148201	-2.52948	-3.86892	O80774;Q8RWJ5;Q9ZV90	O80774;Q8RWJ5		At2g34250;At1g29310	1126	tr|O80774|O80774_ARATH AT2G34250 protein OS=Arabidopsis thaliana OX=3702 GN=At2g34250 PE=2 SV=1;tr|Q8RWJ5|Q8RWJ5_ARATH SecY protein transport family protein OS=Arabidopsis thaliana OX=3702 GN=At1g29310 PE=2 SV=1	AT1G29310;AT2G34250
25.4307	26.4309	NaN	27.2797	27.5131	27.524	26.5541	27.3067	27.6555	26.7643	26.9895	25.784					+	AP1_WT_ELUATE_AP1_WT_INPUT	12	12	12	45.5	45.5	45.5	32.534	0	323.31	12216000000	10	120	1221600000	2.37984	0.0188178	-1.10272	-3.80732	O80798	O80798		T8F5.4	1130	tr|O80798|O80798_ARATH AT1G65270 protein OS=Arabidopsis thaliana OX=3702 GN=At1g65270 PE=1 SV=1	AT1G65270
24.8296	23.9815	NaN	23.7634	23.8733	23.7241	24.5769	24.6774	24.2501	24.4788	24.3206	23.753							10	10	10	39.3	39.3	39.3	39.679	0	28.74	1212400000	21	40	57735000	0.275461	1	0.164453	0.652611	O80842	O80842	Cell division protein FtsY homolog, chloroplastic	CPFTSY	1138	sp|O80842|CFTSY_ARATH Cell division protein FtsY homolog, chloroplastic OS=Arabidopsis thaliana OX=3702 GN=CPFTSY PE=1 SV=2	AT2G45770
26.4479	25.3833	NaN	25.9801	25.9278	26.6088	26.0942	25.6378	26.298	27.0308	27.1783	27.0443							10	10	9	57.7	57.7	53.5	24.146	0	55.6	8606000000	8	105	1075700000	0.195384	1	0.182369	0.487294	O80852	O80852	Glutathione S-transferase F9	GSTF9	1142	sp|O80852|GSTF9_ARATH Glutathione S-transferase F9 OS=Arabidopsis thaliana OX=3702 GN=GSTF9 PE=1 SV=1	AT2G30860
25.6705	NaN	NaN	28.8398	28.3245	28.3949	25.1711	28.4304	29.0151	28.253	27.441	26.8577					+	AP1_WT_ELUATE_AP1_WT_INPUT	33	33	15	58.6	58.6	26	74.157	0	323.31	27681000000	33	293	838810000	3.03268	0.0055308	-2.25787	-5.10203	O80860;Q1PDW5	O80860	ATP-dependent zinc metalloprotease FTSH 2, chloroplastic	FTSH2	1143	sp|O80860|FTSH2_ARATH ATP-dependent zinc metalloprotease FTSH 2, chloroplastic OS=Arabidopsis thaliana OX=3702 GN=FTSH2 PE=1 SV=1	AT2G30950
23.9993	NaN	NaN	26.481	25.9156	25.7774	25.241	26.792	26.8606	26.7738	24.6125	24.9146					+	AP1_WT_ELUATE_AP1_WT_INPUT	12	12	12	50.5	50.5	50.5	31.369	0	252.88	11772000000	13	70	905540000	3.21266	0.00397065	-1.74158	-5.4443	O80897	O80897		At2g32600	1145	tr|O80897|O80897_ARATH At2g32600/T26B15.16 OS=Arabidopsis thaliana OX=3702 GN=At2g32600 PE=1 SV=2	AT2G32600
NaN	NaN	NaN	21.3664	23.1717	21.7454	NaN	22.3393	22.7145	23.1162	23.8752	23.9213							5	5	5	13.6	13.6	13.6	49.251	0	8.7658	948280000	32	13	29634000	1.45745	0.111694	1.48934	2.71491	O80925;Q9M354	O80925;Q9M354	ADP-ribosylation factor GTPase-activating protein AGD7;Probable ADP-ribosylation factor GTPase-activating protein AGD6	AGD7;AGD6	1147	sp|O80925|AGD7_ARATH ADP-ribosylation factor GTPase-activating protein AGD7 OS=Arabidopsis thaliana OX=3702 GN=AGD7 PE=1 SV=1;sp|Q9M354|AGD6_ARATH Probable ADP-ribosylation factor GTPase-activating protein AGD6 OS=Arabidopsis thaliana OX=3702 GN=AGD6 PE=1	AT2G37550;AT3G53710
NaN	NaN	25.1124	21.5285	22.9421	22.5251	26.2124	26.017	24.3315	26.2547	27.32	26.2535							9	3	3	49.6	25.7	25.7	12.736	0	4.9872	6948700000	5	36	1389700000	1.22043	0.177956	2.29141	2.18706	O80929	O80929	60S ribosomal protein L36-1	RPL36A	1150	sp|O80929|RL361_ARATH 60S ribosomal protein L36-1 OS=Arabidopsis thaliana OX=3702 GN=RPL36A PE=3 SV=1	AT2G37600
24.1162	NaN	NaN	24.0346	23.1972	22.6446	NaN	22.7069	22.9602	21.3352	24.5152	24.3556							5	4	4	37	33.6	33.6	28.266	0	76.624	719250000	8	23	89907000	1.60633	0.0836899	1.51585	2.8481	O80932	O80932	Expansin-A3	EXPA3	1151	sp|O80932|EXPA3_ARATH Expansin-A3 OS=Arabidopsis thaliana OX=3702 GN=EXPA3 PE=2 SV=1	AT2G37640
28.1468	28.0181	26.4991	29.9078	29.7389	29.6563	28.3498	29.834	29.5392	29.9602	29.466	29.3229					+	AP1_WT_ELUATE_AP1_WT_INPUT	37	36	33	78	78	72.1	50.443	0	323.31	75806000000	27	545	2807600000	2.11466	0.0313156	-1.47226	-3.32522	O80948	O80948	Jacalin-related lectin 23	JAL23	1154	sp|O80948|JAL23_ARATH Jacalin-related lectin 23 OS=Arabidopsis thaliana OX=3702 GN=JAL23 PE=1 SV=1	AT2G39330
NaN	NaN	NaN	28.3072	28.0447	27.8949	NaN	28.0745	27.7951	28.1732	23.5391	23.3633					+	AP1_WT_ELUATE_AP1_WT_INPUT	27	27	25	53.8	53.8	51	77.274	0	292.57	21174000000	39	229	542920000	7.20344	9.04872e-06	-4.59708	-31.9406	O80983	O80983	ATP-dependent zinc metalloprotease FTSH 4, mitochondrial	FTSH4	1160	sp|O80983|FTSH4_ARATH ATP-dependent zinc metalloprotease FTSH 4, mitochondrial OS=Arabidopsis thaliana OX=3702 GN=FTSH4 PE=1 SV=2	AT2G26140
23.5449	23.8641	NaN	27.417	27.0672	28.1077	NaN	27.4139	27.1077	26.9536	26.3583	24.9995					+	AP1_WT_ELUATE_AP1_WT_INPUT	24	24	23	22.5	22.5	21.8	161.26	0	147.45	10289000000	66	139	155890000	2.89408	0.0071236	-2.65285	-4.84732	O81016;Q7PC85	O81016	ABC transporter G family member 32	ABCG32	1163	sp|O81016|AB32G_ARATH ABC transporter G family member 32 OS=Arabidopsis thaliana OX=3702 GN=ABCG32 PE=1 SV=1	AT2G26910
25.0872	NaN	NaN	24.1661	24.2183	23.5808	24.6953	24.8002	25.037	24.7725	26.3546	25.8217							5	5	5	16.9	16.9	16.9	38.339	0	50.698	3495800000	16	73	218490000	1.52386	0.0975707	1.06053	2.63527	O81062	O81062	Signal peptide peptidase	SPP	1165	sp|O81062|SIP_ARATH Signal peptide peptidase OS=Arabidopsis thaliana OX=3702 GN=SPP PE=2 SV=1	AT2G03120
27.9596	28.2337	28.4442	28.5688	28.3306	27.9445	27.7106	28.0364	28.1743	28.2195	26.8027	27.8633							14	14	14	59	59	59	24.301	0	241.75	33725000000	11	198	3065900000	0.788917	0.419422	-0.376671	-1.50758	O81098	O81098	DNA-directed RNA polymerases II and IV subunit 5A	NRPB5A	1169	sp|O81098|RPB5A_ARATH DNA-directed RNA polymerases II and IV subunit 5A OS=Arabidopsis thaliana OX=3702 GN=NRPB5A PE=1 SV=1	AT3G22320
27.2861	26.8662	25.302	28.5018	28.9816	28.7514	25.3433	28.6175	28.5749	28.2139	27.4278	27.1536					+	AP1_WT_ELUATE_AP1_WT_INPUT	29	29	15	36.1	36.1	21.8	110.44	0	323.31	28301000000	39	297	725660000	3.23654	0.00380525	-2.04368	-4.94824	O81108	O81108	Calcium-transporting ATPase 2, plasma membrane-type	ACA2	1170	sp|O81108|ACA2_ARATH Calcium-transporting ATPase 2, plasma membrane-type OS=Arabidopsis thaliana OX=3702 GN=ACA2 PE=1 SV=1	AT4G37640
25.8204	26.2662	26.4653	26.9086	27.097	27.1972	26.5596	27.8094	28.4523	27.441	28.004	26.3817							5	4	2	23	18.5	13	22.458	0	33.392	16035000000	8	75	2004400000	1.40083	0.125332	-0.901411	-2.36322	O81126	O81126	Serine/arginine-rich splicing factor RSZ22	RSZ22	1171	sp|O81126|RSZ22_ARATH Serine/arginine-rich splicing factor RSZ22 OS=Arabidopsis thaliana OX=3702 GN=RSZ22 PE=1 SV=1	AT4G31580
25.7388	26.08	25.3295	27.4365	27.7922	27.8111	25.9358	28.0705	28.0565	28.1505	28.4511	27.085					+	AP1_WT_ELUATE_AP1_WT_INPUT	8	8	7	33.7	33.7	28.9	21.537	0	49.978	21446000000	8	109	2680700000	1.88837	0.0483984	-1.44952	-3.01839	O81127	O81127	Serine/arginine-rich splicing factor RSZ21	RSZ21	1172	sp|O81127|RSZ21_ARATH Serine/arginine-rich splicing factor RSZ21 OS=Arabidopsis thaliana OX=3702 GN=RSZ21 PE=1 SV=1	AT1G23860
NaN	NaN	NaN	26.7703	27.1457	26.7175	NaN	26.6367	26.2962	26.5268	26.0577	25.4449					+	AP1_WT_ELUATE_AP1_WT_INPUT	10	10	5	53.3	53.3	32.9	27.294	0	124.19	7982100000	19	60	420110000	1.96813	0.0414635	-0.930912	-3.64569	O81146	O81146	Proteasome subunit alpha type-6-A	PAA1	1173	sp|O81146|PSA6A_ARATH Proteasome subunit alpha type-6-A OS=Arabidopsis thaliana OX=3702 GN=PAA1 PE=1 SV=2	AT5G35590
NaN	25.7474	NaN	27.036	27.4434	27.1568	NaN	27.486	27.3662	27.3647	26.6917	26.3023					+	AP1_WT_ELUATE_AP1_WT_INPUT	13	13	13	76	76	76	27.475	0	189.6	12500000000	15	95	833330000	2.86004	0.00758324	-1.06175	-5.11246	O81148;F4JJE5	O81148	Proteasome subunit alpha type-4-A	PAC1	1175	sp|O81148|PSA4A_ARATH Proteasome subunit alpha type-4-A OS=Arabidopsis thaliana OX=3702 GN=PAC1 PE=1 SV=1	AT3G22110
NaN	NaN	NaN	24.0464	23.8694	22.8706	NaN	23.1525	22.0899	23.1508	24.1314	23.7628							13	3	3	71.7	22.8	22.8	25.947	0	23.044	1770900000	14	42	126490000	0.677021	0.520942	0.750513	1.40237	O81149	O81149	Proteasome subunit alpha type-5-A	PAE1	1176	sp|O81149|PSA5A_ARATH Proteasome subunit alpha type-5-A OS=Arabidopsis thaliana OX=3702 GN=PAE1 PE=1 SV=1	AT1G53850
28.9995	28.1144	28.3971	30.561	30.1603	30.7243	28.9783	30.3265	30.3185	29.6545	29.2204	28.9964					+	AP1_WT_ELUATE_AP1_WT_INPUT	68	68	68	59.6	59.6	59.6	160.82	0	323.31	105300000000	80	826	1316200000	4.17121	0.000739975	-1.5065	-6.51777	O81283	O81283	Translocase of chloroplast 159, chloroplastic	TOC159	1182	sp|O81283|TC159_ARATH Translocase of chloroplast 159, chloroplastic OS=Arabidopsis thaliana OX=3702 GN=TOC159 PE=1 SV=1	AT4G02510
26.0496	25.9095	25.542	25.2038	25.6439	24.3643	26.5397	24.979	24.707	24.9674	27.0331	26.5071					+	AP1_WT_ELUATE_AP1_WT_INPUT	16	12	6	51.4	41.2	23	47.689	0	71.406	3766200000	23	71	163750000	2.99602	0.00591692	1.28595	4.58092	O81312	O81312	UDP-glucuronate 4-epimerase 3	GAE3	1184	sp|O81312|GAE3_ARATH UDP-glucuronate 4-epimerase 3 OS=Arabidopsis thaliana OX=3702 GN=GAE3 PE=2 SV=1	AT4G00110
30.8871	31.1227	31.3454	29.9499	29.8584	29.9205	31.0273	28.9916	28.8176	29.2853	31.1083	30.9036					+	AP1_WT_ELUATE_AP1_WT_INPUT	32	32	30	78.3	78.3	75	57.301	0	323.31	88634000000	24	700	3693100000	4.60663	0.000377098	1.59516	7.343	O81416;Q9SZ90;Q9SUS0;Q9C9H5;Q2V4L8;Q93YQ7	O81416	Endoglucanase 17		1185	sp|O81416|GUN17_ARATH Endoglucanase 17 OS=Arabidopsis thaliana OX=3702 GN=At4g02290 PE=2 SV=1	AT4G02290
26.5925	26.3264	27.1819	23.3396	22.4249	22.6682	28.1086	24.5921	23.4543	24.1868	27.6503	27.8429					+	AP1_WT_ELUATE_AP1_WT_INPUT	6	6	5	22.4	22.4	19.6	28.779	0	99.591	4876800000	7	92	696680000	5.18277	0.000153743	3.83944	8.54736	O81488	O81488	PHD finger protein ALFIN-LIKE 4;PHD finger protein ALFIN-LIKE 4, N-terminally processed	AL4	1187	sp|O81488|ALFL4_ARATH PHD finger protein ALFIN-LIKE 4 OS=Arabidopsis thaliana OX=3702 GN=AL4 PE=1 SV=2	AT5G26210
NaN	25.1186	NaN	25.2489	25.6347	25.329	24.9846	26.3093	25.8768	26.5478	26.5224	26.3923							18	18	18	39.1	39.1	39.1	66.28	0	64.907	5616200000	29	107	193660000	0.0596999	1	-0.069908	-0.166932	O81629;F4HSX9	O81629		F8M12.21	1188	sp|O81629|KLCR1_ARATH Protein KINESIN LIGHT CHAIN-RELATED 1 OS=Arabidopsis thaliana OX=3702 GN=KLCR1 PE=1 SV=1	AT4G10840
30.0859	29.8866	29.3333	27.7856	27.0201	26.6415	29.5143	26.6167	25.3951	27.3636	31.5157	29.8					+	AP1_WT_ELUATE_AP1_WT_INPUT	9	4	2	63.1	48.5	23.1	13.658	0	323.31	38768000000	6	174	6461400000	4.41235	0.000500647	3.21886	6.9664	Q9LD28;O81826;Q9C681	Q9LD28;O81826;Q9C681	Histone H2A.6;Probable histone H2A.3;Probable histone H2A.1	RAT5	1195	sp|Q9LD28|H2A6_ARATH Histone H2A.6 OS=Arabidopsis thaliana OX=3702 GN=RAT5 PE=1 SV=1;sp|O81826|H2A3_ARATH Probable histone H2A.3 OS=Arabidopsis thaliana OX=3702 GN=At4g27230 PE=1 SV=1;sp|Q9C681|H2A1_ARATH Probable histone H2A.1 OS=Arabidopsis thaliana OX=3	AT1G51060;AT4G27230;AT5G54640
28.0972	28.0182	27.4601	28.1568	28.2556	27.9628	27.3247	28.307	27.9398	27.919	27.3995	27.3452					+	AP1_WT_ELUATE_AP1_WT_INPUT	19	19	19	67.3	67.3	67.3	32.662	0	106.69	19536000000	18	175	1085300000	1.8855	0.0486283	-0.482691	-3.01452	O81845	O81845	Mitochondrial uncoupling protein 1	PUMP1	1196	sp|O81845|PUMP1_ARATH Mitochondrial uncoupling protein 1 OS=Arabidopsis thaliana OX=3702 GN=PUMP1 PE=1 SV=1	AT3G54110
27.2925	27.0485	29.2268	27.9199	27.9094	27.2854	27.9185	26.6691	27.0665	27.7448	27.5505	28.0114							14	8	8	62.3	43.4	43.4	29.842	0	229.32	17518000000	13	128	1347500000	0.517274	0.71852	0.408862	1.08379	O82122	O82122	Vegetative storage protein 2	VSP2	1200	sp|O82122|VSP2_ARATH Vegetative storage protein 2 OS=Arabidopsis thaliana OX=3702 GN=VSP2 PE=2 SV=1	AT5G24770
26.1239	NaN	NaN	25.7922	25.7563	26.0961	25.266	26.2534	27.3101	25.6449	26.1688	25.6588							5	4	4	47.6	38.5	38.5	15.895	0	285.92	6453500000	7	59	921930000	0.430204	0.857239	-0.337799	-0.947001	O82204	O82204	60S ribosomal protein L28-1	RPL28A	1203	sp|O82204|RL281_ARATH 60S ribosomal protein L28-1 OS=Arabidopsis thaliana OX=3702 GN=RPL28A PE=1 SV=1	AT2G19730
23.085	26.6115	NaN	26.7798	26.3603	26.6665	26.6911	25.5968	25.7444	26.4263	24.8431	25.4312							38	38	38	44.9	44.9	44.9	125.76	0	306.45	14543000000	63	196	230830000	0.74879	0.454152	-0.93002	-1.4599	O82265	O82265	Sister-chromatid cohesion protein 3	SCC3	1210	sp|O82265|SCC3_ARATH Sister-chromatid cohesion protein 3 OS=Arabidopsis thaliana OX=3702 GN=SCC3 PE=1 SV=2	AT2G47980
26.9397	26.8264	26.7056	28.1484	27.2144	27.1743	27.5738	27.5906	27.2879	27.6445	27.8463	27.2096							24	24	24	59.6	59.6	59.6	58.902	0	254.88	23056000000	22	256	1048000000	0.701299	0.497563	-0.326455	-1.37574	O82266	O82266	Protein SLOW WALKER 1	SWA1	1211	sp|O82266|SWA1_ARATH Protein SLOW WALKER 1 OS=Arabidopsis thaliana OX=3702 GN=SWA1 PE=2 SV=1	AT2G47990
28.112	27.5456	27.6635	23.0198	21.7582	22.6856	28.2505	22.2449	22.8872	23.4255	26.063	27.996				TCP	+	AP1_WT_ELUATE_AP1_WT_INPUT	8	8	6	39.3	39.3	33	40.379	0	203.75	5465000000	10	109	546500000	6.57906	1.90518e-05	4.9349	12.1318	O82277	O82277	Transcription factor TCP10	TCP10	1213	sp|O82277|TCP10_ARATH Transcription factor TCP10 OS=Arabidopsis thaliana OX=3702 GN=TCP10 PE=1 SV=1	AT2G31070
25.3279	NaN	NaN	25.5724	25.7846	25.9036	NaN	25.5548	25.5065	25.4062	25.0738	NaN							6	6	5	26.3	26.3	22	28.687	0	33.896	4503000000	10	51	450300000	1.49856	0.102546	-0.420504	-2.7864	O82352	O82352	Reticulon-like protein B5	RTNLB5	1216	sp|O82352|RTNLE_ARATH Reticulon-like protein B5 OS=Arabidopsis thaliana OX=3702 GN=RTNLB5 PE=1 SV=1	AT2G46170
NaN	25.28	25.6478	27.7604	28.0305	27.4029	25.814	27.8642	27.5057	27.7468	27.3054	25.9896					+	AP1_WT_ELUATE_AP1_WT_INPUT	35	35	35	60.4	60.4	60.4	81.064	0	261.8	17742000000	40	165	443540000	3.25479	0.00367741	-1.71105	-5.21054	O82462	O82462			1220	sp|O82462|SYEC_ARATH Glutamate--tRNA ligase, cytoplasmic OS=Arabidopsis thaliana OX=3702 GN=At5g26710 PE=1 SV=1	AT5G26710
27.0664	27.2508	26.4911	25.5226	25.4026	26.6331	27.7725	25.3373	25.513	25.6281	26.7191	27.5187					+	AP1_WT_ELUATE_AP1_WT_INPUT	15	15	15	31.2	31.2	31.2	76.644	0	32.685	5909500000	39	55	151530000	3.43806	0.00268215	1.46363	5.26638	O82486	O82486	N6-adenosine-methyltransferase MT-A70-like	MTA	1222	sp|O82486|MTA70_ARATH N6-adenosine-methyltransferase MT-A70-like OS=Arabidopsis thaliana OX=3702 GN=MTA PE=1 SV=2	AT4G10760
27.4251	27.3151	25.4272	29.6435	29.3023	29.7752	27.293	28.7857	29.6815	29.9313	28.5176	28.5925					+	AP1_WT_ELUATE_AP1_WT_INPUT	51	51	51	57.4	57.4	57.4	120.58	0	323.31	97696000000	63	570	1550700000	2.7378	0.00952422	-2.09151	-4.19991	O82491;F4JME7	O82491	FACT complex subunit SPT16	SPT16	1224	sp|O82491|SPT16_ARATH FACT complex subunit SPT16 OS=Arabidopsis thaliana OX=3702 GN=SPT16 PE=1 SV=1	AT4G10710
NaN	NaN	NaN	21.9796	21.9928	23.3574	23.0235	23.9021	23.9067	23.0392	25.0226	NaN							6	6	6	24.3	24.3	24.3	50.721	0	25.741	749720000	21	23	35701000	0.58066	0.630547	0.993451	1.23606	O82533;Q9LXJ0	O82533;Q9LXJ0	Cell division protein FtsZ homolog 2-1, chloroplastic;Cell division protein FtsZ homolog 2-2, chloroplastic	FTSZ2-1;FTSZ2-2	1227	sp|O82533|FTZ21_ARATH Cell division protein FtsZ homolog 2-1, chloroplastic OS=Arabidopsis thaliana OX=3702 GN=FTSZ2-1 PE=1 SV=2;sp|Q9LXJ0|FTZ22_ARATH Cell division protein FtsZ homolog 2-2, chloroplastic OS=Arabidopsis thaliana OX=3702 GN=FTSZ2-2 PE=1 SV=	AT2G36250;AT3G52750
NaN	NaN	NaN	26.96	26.9629	26.3909	NaN	26.6917	27.4608	26.4694	26.7489	25.3388							8	8	8	74.5	74.5	74.5	12.397	0	217.91	7815300000	5	53	1563100000	0.887858	0.3424	-0.778758	-1.75683	O82628	O82628	V-type proton ATPase subunit G1	VHA-G1	1232	sp|O82628|VATG1_ARATH V-type proton ATPase subunit G1 OS=Arabidopsis thaliana OX=3702 GN=VHA-G1 PE=1 SV=1	AT3G01390
NaN	NaN	NaN	27.4992	28.4186	27.9642	NaN	27.919	28.3606	27.4143	26.5044	26.1593					+	AP1_WT_ELUATE_AP1_WT_INPUT	21	21	14	44.3	44.3	28.1	69.656	0	323.31	16351000000	29	161	563830000	2.58968	0.0127007	-1.59746	-4.9522	O82663	O82663	Succinate dehydrogenase [ubiquinone] flavoprotein subunit 1, mitochondrial	SDH1-1	1238	sp|O82663|SDHA1_ARATH Succinate dehydrogenase [ubiquinone] flavoprotein subunit 1, mitochondrial OS=Arabidopsis thaliana OX=3702 GN=SDH1-1 PE=1 SV=1	AT5G66760
NaN	25.0447	NaN	25.9248	27.4395	26.2616	NaN	26.4827	27.0909	25.8239	25.5514	25.6055							8	8	6	48.6	48.6	38	24.915	0	321.73	6258900000	7	80	894120000	1.5396	0.0946864	-1.1034	-2.74123	O82793;Q9LFF9	O82793	Soluble inorganic pyrophosphatase 3	PPA3	1240	sp|O82793|IPYR3_ARATH Soluble inorganic pyrophosphatase 3 OS=Arabidopsis thaliana OX=3702 GN=PPA3 PE=2 SV=1	AT2G46860
23.8728	24.4288	NaN	21.2583	23.5009	21.5412	27.2536	22.5325	21.6219	23.4096	26.3688	26.6554					+	AP1_WT_ELUATE_AP1_WT_INPUT	13	13	13	29.6	29.6	29.6	77.205	0	61.644	2066700000	30	88	68891000	2.87612	0.00735588	3.4051	4.5788	O82804	O82804	Protein EARLY FLOWERING 3	ELF3	1242	sp|O82804|ELF3_ARATH Protein EARLY FLOWERING 3 OS=Arabidopsis thaliana OX=3702 GN=ELF3 PE=1 SV=1	AT2G25930
28.153	26.9352	27.1831	30.8388	29.2882	27.8454	29.1749	28.2287	27.1615	28.8464	29.9111	28.3575							10	3	3	68.5	28.1	28.1	28.227	0	112.79	64311000000	8	272	8038900000	0.246791	1	-0.415722	-0.592749	Q8VZ87;P0CJ48;P04778	Q8VZ87;P0CJ48;P04778	Chlorophyll a-b binding protein 3, chloroplastic;Chlorophyll a-b binding protein 2, chloroplastic;Chlorophyll a-b binding protein 1, chloroplastic	LHCB1.2;LHCB1.1;LHCB1.3	1243	sp|Q8VZ87|CB1B_ARATH Chlorophyll a-b binding protein 3, chloroplastic OS=Arabidopsis thaliana OX=3702 GN=LHCB1.2 PE=1 SV=2;sp|P0CJ48|CB1A_ARATH Chlorophyll a-b binding protein 2, chloroplastic OS=Arabidopsis thaliana OX=3702 GN=LHCB1.1 PE=1 SV=1;sp|P04778|	AT1G29910;AT1G29920;AT1G29930
23.7852	NaN	NaN	26.7601	26.1105	26.3516	NaN	26.2899	26.5773	25.7978	25.7153	25.6934							7	7	7	78	78	78	14.499	0	323.31	6676600000	8	80	834580000	1.5042	0.10138	-1.24989	-2.68485	P09468	P09468	ATP synthase epsilon chain, chloroplastic	atpE	1245	sp|P09468|ATPE_ARATH ATP synthase epsilon chain, chloroplastic OS=Arabidopsis thaliana OX=3702 GN=atpE PE=1 SV=2	ATCG00470
NaN	NaN	NaN	25.8963	25.8412	26.0749	NaN	26.2639	25.7685	26.1523	25.8885	25.9961							17	17	17	36.1	36.1	36.1	63.837	0	55.09	7229800000	31	93	233220000	0.148593	1	-0.0571782	-0.389661	P0C896	P0C896	Pentatricopeptide repeat-containing protein At3g02650, mitochondrial		1246	sp|P0C896|PP209_ARATH Pentatricopeptide repeat-containing protein At3g02650, mitochondrial OS=Arabidopsis thaliana OX=3702 GN=At3g02650 PE=1 SV=1	AT3G02650
25.3431	25.0443	NaN	21.3549	22.9173	21.7548	NaN	23.2613	24.1096	23.5442	NaN	24.9586					+	AP1_WT_ELUATE_AP1_WT_INPUT	11	11	11	10.8	10.8	10.8	185.02	0	25.346	552140000	86	21	6420300	2.04375	0.0358932	2.29166	3.57455	P0C945	P0C945	Uncharacterized protein At1g21580		1248	sp|P0C945|Y1158_ARATH Uncharacterized protein At1g21580 OS=Arabidopsis thaliana OX=3702 GN=At1g21580 PE=1 SV=1	AT1G21580
NaN	NaN	NaN	21.8377	21.1934	21.4574	27.0036	24.2398	21.8226	21.9857	25.2005	26.8197					+	AP1_WT_ELUATE_AP1_WT_INPUT	12	12	12	28.4	28.4	28.4	77.532	0	67.579	1715700000	39	44	43992000	3.10902	0.0047871	4.25182	5.64563	P0CB21	P0CB21	Uncharacterized protein At4g26450		1250	sp|P0CB21|Y4645_ARATH Uncharacterized protein At4g26450 OS=Arabidopsis thaliana OX=3702 GN=At4g26450 PE=4 SV=1	AT4G26450
NaN	25.6171	NaN	22.1826	21.405	22.7705	25.2555	22.335	21.8283	22.1626	23.9744	24.9432					+	AP1_WT_ELUATE_AP1_WT_INPUT	8	8	8	10.7	10.7	10.7	123.29	0	14.989	635350000	61	21	10416000	4.26403	0.000639329	2.83357	7.75781	P0CB22;Q9C5X4	P0CB22	Histone-lysine N-methyltransferase ATX2	ATX2	1251	sp|P0CB22|ATX2_ARATH Histone-lysine N-methyltransferase ATX2 OS=Arabidopsis thaliana OX=3702 GN=ATX2 PE=1 SV=1	AT1G05830
NaN	NaN	NaN	21.4069	21.8682	22.2766	26.8312	22.0298	23.4239	23.7202	26.9417	NaN					+	AP1_WT_ELUATE_AP1_WT_INPUT	3	3	3	2	2	2	202.13	0.0014853	2.3935	2548600000	90	10	28318000	3.19523	0.00405797	4.43218	6.48716	P0CE10;F4KGU4	P0CE10	Putative uncharacterized protein At4g01020, chloroplastic		1253	sp|P0CE10|DEAHB_ARATH ATP-dependent RNA helicase DEAH11, chloroplastic OS=Arabidopsis thaliana OX=3702 GN=At4g01020 PE=3 SV=1	AT4G01020
27.3456	28.371	27.0199	29.2837	30.636	29.9795	27.9904	29.6341	29.3596	29.2016	28.1687	27.9217					+	AP1_WT_ELUATE_AP1_WT_INPUT	24	11	6	73.7	39.5	23.3	41.797	0	323.31	58604000000	21	331	2790600000	3.95261	0.00106499	-1.87953	-6.12781	P0CJ47;P0CJ46	P0CJ47;P0CJ46	Actin-3;Actin-1	ACT3;ACT1	1254	sp|P0CJ47|ACT3_ARATH Actin-3 OS=Arabidopsis thaliana OX=3702 GN=ACT3 PE=1 SV=1;sp|P0CJ46|ACT1_ARATH Actin-1 OS=Arabidopsis thaliana OX=3702 GN=ACT1 PE=1 SV=1	AT2G37620;AT3G53750
30.5983	30.5779	31.2111	29.4676	29.6218	29.4842	30.8315	28.9914	28.4018	28.6665	30.6755	30.6978					+	AP1_WT_ELUATE_AP1_WT_INPUT	14	14	5	95.3	95.3	69.8	16.862	0	323.31	79974000000	9	411	8886000000	4.62125	0.000368644	1.65979	7.37189	P0DH96;P0DH95	P0DH96;P0DH95	Calmodulin-4;Calmodulin-1	CAM4;CAM1	1258	sp|P0DH96|CALM4_ARATH Calmodulin-4 OS=Arabidopsis thaliana OX=3702 GN=CAM4 PE=1 SV=1;sp|P0DH95|CALM1_ARATH Calmodulin-1 OS=Arabidopsis thaliana OX=3702 GN=CAM1 PE=1 SV=1	AT1G66410;AT5G37780
27.6899	28.0648	27.2814	24.6129	24.1253	25.0717	28.2858	25.4918	24.6945	24.807	28.4669	28.3409					+	AP1_WT_ELUATE_AP1_WT_INPUT	13	4	4	87.9	45	45	16.819	0	254.84	9377000000	9	128	1041900000	6.60951	1.84822e-05	3.2211	12.2225	Q682T9;Q03509;P59220;P0DH98;P0DH97	Q682T9;Q03509;P59220;P0DH98;P0DH97	Calmodulin-5;Calmodulin-6;Calmodulin-7;Calmodulin-3;Calmodulin-2	CAM5;CAM6;CAM7;CAM3;CAM2	1259	sp|Q682T9|CALM5_ARATH Calmodulin-5 OS=Arabidopsis thaliana OX=3702 GN=CAM5 PE=1 SV=1;sp|Q03509|CALM6_ARATH Calmodulin-6 OS=Arabidopsis thaliana OX=3702 GN=CAM6 PE=1 SV=2;sp|P59220|CALM7_ARATH Calmodulin-7 OS=Arabidopsis thaliana OX=3702 GN=CAM7 PE=1 SV=2;s	AT2G27030;AT2G41110;AT3G43810;AT3G56800;AT5G21274
32.8214	32.645	32.2407	33.0524	33.1859	33.0103	31.9067	32.86	32.7846	32.938	32.8286	32.6917							35	35	35	75.3	75.3	75.3	49.502	0	323.31	774060000000	25	1985	30962000000	1.70647	0.06873	-0.449498	-2.77383	Q8W4H7;Q8GTY0;Q0WL56;P0DH99	Q8W4H7;Q8GTY0;Q0WL56;P0DH99	Elongation factor 1-alpha 2;Elongation factor 1-alpha 4;Elongation factor 1-alpha 3;Elongation factor 1-alpha 1	A2;A4;A3;A1	1260	sp|Q8W4H7|EF1A2_ARATH Elongation factor 1-alpha 2 OS=Arabidopsis thaliana OX=3702 GN=A2 PE=1 SV=2;sp|Q8GTY0|EF1A4_ARATH Elongation factor 1-alpha 4 OS=Arabidopsis thaliana OX=3702 GN=A4 PE=1 SV=2;sp|Q0WL56|EF1A3_ARATH Elongation factor 1-alpha 3 OS=Arabido	AT1G07920;AT1G07930;AT1G07940;AT5G60390
24.4963	24.1676	NaN	26.5416	26.7474	26.6806	NaN	27.5249	27.3315	27.3	25.4814	24.4785					+	AP1_WT_ELUATE_AP1_WT_INPUT	3	3	3	43.5	43.5	43.5	7.7372	0	112.56	10633000000	3	145	3544300000	4.22864	0.000671189	-2.36505	-7.66984	P0DI75;P0DI74	P0DI75;P0DI74	Protein transport protein Sec61 subunit gamma-2;Protein transport protein Sec61 subunit gamma-1	SEC61G2;SEC61G1	1264	sp|P0DI75|S61G2_ARATH Protein transport protein Sec61 subunit gamma-2 OS=Arabidopsis thaliana OX=3702 GN=SEC61G2 PE=1 SV=1;sp|P0DI74|S61G1_ARATH Protein transport protein Sec61 subunit gamma-1 OS=Arabidopsis thaliana OX=3702 GN=SEC61G1 PE=1 SV=1	AT4G24920;AT5G50460
23.8272	NaN	NaN	22.6052	22.9343	21.4811	NaN	22.6164	23.1482	22.0624	23.9061	23.9701					+	AP1_WT_ELUATE_AP1_WT_INPUT	5	5	5	18.9	18.9	18.9	44.221	0	5.4775	649730000	19	9	34196000	2.23129	0.025011	1.42651	3.90369	P0DKJ6	P0DKJ6			1266	sp|P0DKJ6|GDL4_ARATH GDSL esterase/lipase At1g20120 OS=Arabidopsis thaliana OX=3702 GN=At1g20120 PE=2 SV=1	AT1G20120
27.0632	27.581	28.9215	30.391	29.928	30.068	28.561	29.9275	29.7535	30.2036	27.8185	28.3699					+	AP1_WT_ELUATE_AP1_WT_INPUT	51	51	51	50.4	50.4	50.4	134.97	0	323.31	106320000000	52	676	2044500000	4.28811	0.000615182	-1.99274	-6.73275	P0DKL6;P0DKL4	P0DKL6;P0DKL4			1267	sp|P0DKL6|S130B_ARATH Spliceosome-associated protein 130 B OS=Arabidopsis thaliana OX=3702 GN=SAP130B PE=2 SV=1;sp|P0DKL4|S130A_ARATH Spliceosome-associated protein 130 A OS=Arabidopsis thaliana OX=3702 GN=SAP130A PE=2 SV=1	AT3G55200;AT3G55220
28.0146	27.0558	28.4248	29.2256	29.0533	28.8714	27.2655	29.1715	29.2823	29.1085	29.8137	29.1584							13	9	9	60	38.9	38.9	20.216	0	323.31	54343000000	12	237	4528600000	1.04782	0.249168	-0.829968	-1.87965	P10795	P10795	Ribulose bisphosphate carboxylase small chain 1A, chloroplastic	RBCS-1A	1270	sp|P10795|RBS1A_ARATH Ribulose bisphosphate carboxylase small subunit 1A, chloroplastic OS=Arabidopsis thaliana OX=3702 GN=RBCS-1A PE=1 SV=2	AT1G67090
29.7641	29.1497	29.4615	31.0074	30.9248	31.0058	29.0364	30.818	30.7381	30.5685	30.9632	30.5171					+	AP1_WT_ELUATE_AP1_WT_INPUT	14	14	6	64.1	64.1	24.3	20.284	0	323.31	147790000000	13	397	11369000000	2.00899	0.0382672	-1.02843	-3.18147	P10798;P10797	P10798;P10797	Ribulose bisphosphate carboxylase small chain 3B, chloroplastic;Ribulose bisphosphate carboxylase small chain 2B, chloroplastic	RBCS-3B;RBCS-2B	1272	sp|P10798|RBS3B_ARATH Ribulose bisphosphate carboxylase small subunit 3B, chloroplastic OS=Arabidopsis thaliana OX=3702 GN=RBCS-3B PE=1 SV=2;sp|P10797|RBS2B_ARATH Ribulose bisphosphate carboxylase small subunit 2B, chloroplastic OS=Arabidopsis thaliana OX=	AT5G38410;AT5G38420
30.3047	30.5885	29.855	30.397	30.7231	30.8102	30.3327	30.3832	30.3006	30.2708	30.1832	30.0188							28	28	28	73.6	73.6	73.6	51.981	0	323.31	111920000000	21	883	5329600000	1.06428	0.240856	-0.267014	-1.90267	P10896	P10896	Ribulose bisphosphate carboxylase/oxygenase activase, chloroplastic	RCA	1273	sp|P10896|RCA_ARATH Ribulose bisphosphate carboxylase/oxygenase activase, chloroplastic OS=Arabidopsis thaliana OX=3702 GN=RCA PE=1 SV=2	AT2G39730
27.541	28.2267	26.515	27.4273	27.2483	27.3479	27.5228	26.9832	27.0937	27.5084	27.8301	27.9469							13	13	13	47.8	47.8	47.8	43.115	0	128.8	15173000000	16	141	948330000	0.645003	0.554516	0.32895	1.28886	P13114	P13114	Chalcone synthase	CHS	1278	sp|P13114|CHSY_ARATH Chalcone synthase OS=Arabidopsis thaliana OX=3702 GN=CHS PE=1 SV=1	AT5G13930
28.774	28.765	29.2562	27.5345	27.5723	27.6366	29.9666	27.2486	27.2552	27.4473	29.2487	29.3372					+	AP1_WT_ELUATE_AP1_WT_INPUT	54	54	41	63.5	63.5	50.8	129.33	0	323.31	22376000000	69	427	324290000	5.474	9.57428e-05	1.77552	9.21123	P14713	P14713	Phytochrome B	PHYB	1280	sp|P14713|PHYB_ARATH Phytochrome B OS=Arabidopsis thaliana OX=3702 GN=PHYB PE=1 SV=1	AT2G18790
24.3117	23.6856	NaN	21.0953	22.5916	22.9041	27.6264	21.8868	22.6327	24.1297	26.3416	27.5825					+	AP1_WT_ELUATE_AP1_WT_INPUT	28	27	26	39.2	38.5	37.9	123.72	0	73.148	2608100000	55	72	47420000	2.42084	0.0174036	3.36955	3.869	P14714	P14714	Phytochrome C	PHYC	1281	sp|P14714|PHYC_ARATH Phytochrome C OS=Arabidopsis thaliana OX=3702 GN=PHYC PE=1 SV=1	AT5G35840
NaN	NaN	NaN	25.9973	25.661	26.1207	NaN	25.5917	25.4254	25.3733	25.1044	25.0987							11	11	11	31.9	31.9	31.9	63.597	0	191.67	5402500000	18	112	300140000	1.40404	0.124503	-0.593343	-2.62273	P14891	P14891	3-hydroxy-3-methylglutaryl-coenzyme A reductase 1	HMG1	1282	sp|P14891|HMDH1_ARATH 3-hydroxy-3-methylglutaryl-coenzyme A reductase 1 OS=Arabidopsis thaliana OX=3702 GN=HMG1 PE=1 SV=1	AT1G76490
31.8967	32.1186	31.7912	31.898	31.78	31.5411	32.4074	31.2841	30.1377	31.4309	33.2253	32.7123							20	20	9	63.1	63.1	31.9	17.957	0	266.65	358100000000	9	640	39789000000	1.8583	0.0512283	1.0133	2.97787	P16181	P16181	40S ribosomal protein S11-1	RPS11A	1285	sp|P16181|RS111_ARATH 40S ribosomal protein S11-1 OS=Arabidopsis thaliana OX=3702 GN=RPS11A PE=2 SV=1	AT3G48930
33.7252	33.9236	34.0549	32.7163	32.4509	32.2257	33.4913	32.3273	32.3608	32.4029	34.403	33.509					+	AP1_WT_ELUATE_AP1_WT_INPUT	41	41	30	72.2	72.2	56.3	44.559	0	323.31	848580000000	25	2176	33943000000	5.41568	0.000102995	1.43717	9.07509	P17094	P17094	60S ribosomal protein L3-1	ARP1	1287	sp|P17094|RL31_ARATH 60S ribosomal protein L3-1 OS=Arabidopsis thaliana OX=3702 GN=ARP1 PE=1 SV=5	AT1G43170
25.1543	NaN	NaN	25.3888	25.1825	21.96	NaN	25.2747	25.5429	25.4114	26.0309	25.2124							22	6	6	74.3	29.3	29.3	43.255	0	158.96	2377500000	18	25	132080000	0.340626	1	0.672462	0.788213	P17562	P17562	S-adenosylmethionine synthase 2	SAM2	1288	sp|P17562|METK2_ARATH S-adenosylmethionine synthase 2 OS=Arabidopsis thaliana OX=3702 GN=SAM2 PE=1 SV=1	AT4G01850
31.4236	30.6506	31.749	30.7329	30.1682	31.0792	31.2555	30.5057	31.4543	30.9051	32.3441	31.2812							27	27	26	75.8	75.8	72.7	51.63	0	323.31	164380000000	25	1067	6575000000	1.26837	0.163391	0.643115	2.18372	P17745	P17745	Elongation factor Tu, chloroplastic	TUFA	1290	sp|P17745|EFTU_ARATH Elongation factor Tu, chloroplastic OS=Arabidopsis thaliana OX=3702 GN=TUFA PE=1 SV=1	AT4G20360
27.2472	27.5387	27.0103	20.2497	22.0928	25.0076	26.8029	21.3521	22.4846	25.054	26.5122	26.5214				MIKC_MADS	+	AP1_WT_ELUATE_AP1_WT_INPUT	7	7	7	42.1	42.1	42.1	28.723	0	43.846	3453800000	11	45	313990000	3.39109	0.00288233	4.23198	5.19133	P17839	P17839	Floral homeotic protein AGAMOUS	AG	1291	sp|P17839|AG_ARATH Floral homeotic protein AGAMOUS OS=Arabidopsis thaliana OX=3702 GN=AG PE=1 SV=2	AT4G18960
NaN	NaN	NaN	25.0419	25.7282	25.1809	NaN	25.9742	25.5642	25.8139	25.6174	25.4041							14	14	14	37.6	37.6	37.6	44.545	0	22.832	4811100000	27	38	178190000	0.0500867	1	-0.0398057	-0.142866	P18064	P18064	Guanine nucleotide-binding protein alpha-1 subunit	GPA1	1292	sp|P18064|GPA1_ARATH Guanine nucleotide-binding protein alpha-1 subunit OS=Arabidopsis thaliana OX=3702 GN=GPA1 PE=1 SV=1	AT2G26300
28.5495	29.0392	29.6451	30.2699	29.5068	29.6181	28.3822	29.9272	29.9051	30.1366	28.365	28.8017					+	AP1_WT_ELUATE_AP1_WT_INPUT	83	83	83	55.7	55.7	55.7	204.62	0	323.31	100310000000	83	829	1208600000	3.08305	0.00501068	-1.09682	-4.71235	P18616	P18616	DNA-directed RNA polymerase II subunit 1	NRPB1	1293	sp|P18616|NRPB1_ARATH DNA-directed RNA polymerase II subunit RPB1 OS=Arabidopsis thaliana OX=3702 GN=NRPB1 PE=1 SV=3	AT4G35800
28.3781	27.9446	27.87	32.324	31.7776	31.5322	29.3945	31.8938	32.3411	31.5941	29.8268	29.3362					+	AP1_WT_ELUATE_AP1_WT_INPUT	36	36	35	85.3	85.3	83.1	53.933	0	323.31	279430000000	28	1152	9979700000	5.13838	0.000164769	-3.11877	-8.44956	P19366	P19366	ATP synthase subunit beta, chloroplastic	atpB	1294	sp|P19366|ATPB_ARATH ATP synthase subunit beta, chloroplastic OS=Arabidopsis thaliana OX=3702 GN=atpB PE=1 SV=2	ATCG00480
23.9349	23.6432	24.0224	28.4492	28.4583	28.6812	25.0916	28.4316	28.3231	28.0601	26.6729	25.4372					+	AP1_WT_ELUATE_AP1_WT_INPUT	54	14	13	53.1	19.4	18.5	104.4	0	208.81	19838000000	50	195	396750000	4.68969	0.000338541	-3.6002	-7.50832	P19456	P19456	ATPase 2, plasma membrane-type	AHA2	1295	sp|P19456|PMA2_ARATH ATPase 2, plasma membrane-type OS=Arabidopsis thaliana OX=3702 GN=AHA2 PE=1 SV=2	AT4G30190
NaN	NaN	NaN	26.4952	27.7684	27.217	NaN	27.0917	27.0361	26.666	25.4501	24.9666					+	AP1_WT_ELUATE_AP1_WT_INPUT	18	18	15	45.6	45.6	38.2	52.782	0	127.13	8363100000	23	115	363610000	2.70147	0.0101816	-1.83742	-5.21358	P20115	P20115	Citrate synthase 4, mitochondrial	CSY4	1296	sp|P20115|CISY4_ARATH Citrate synthase 4, mitochondrial OS=Arabidopsis thaliana OX=3702 GN=CSY4 PE=1 SV=3	AT2G44350
23.1687	NaN	NaN	29.1463	29.1962	29.4124	NaN	28.9882	28.509	28.5746	25.739	24.8089					+	AP1_WT_ELUATE_AP1_WT_INPUT	48	26	25	49.6	30.5	29.3	104.45	0	323.31	29559000000	49	371	603250000	4.10696	0.000814915	-4.3989	-8.19438	P20431;Q43128;Q9T0E0	P20431	ATPase 3, plasma membrane-type	AHA3	1297	sp|P20431|PMA3_ARATH ATPase 3, plasma membrane-type OS=Arabidopsis thaliana OX=3702 GN=AHA3 PE=1 SV=2	AT5G57350
30.1285	30.1928	29.1674	32.8635	32.7874	32.9166	29.6226	32.617	32.5331	32.336	30.7913	30.329					+	AP1_WT_ELUATE_AP1_WT_INPUT	65	65	24	55	55	21.3	104.22	0	323.31	429560000000	50	1654	8591100000	6.0283	4.36393e-05	-2.63698	-10.5909	P20649	P20649	ATPase 1, plasma membrane-type	AHA1	1298	sp|P20649|PMA1_ARATH ATPase 1, plasma membrane-type OS=Arabidopsis thaliana OX=3702 GN=AHA1 PE=1 SV=3	AT2G18960
NaN	NaN	NaN	21.6804	21.6912	24.0113	24.5302	24.0696	23.62	24.4113	24.437	24.0799							8	6	6	55.5	45	45	24.671	0	13.672	1397100000	10	30	139710000	0.73987	0.462453	1.10177	1.48151	P21216	P21216	Soluble inorganic pyrophosphatase 2	PPA2	1299	sp|P21216|IPYR2_ARATH Soluble inorganic pyrophosphatase 2 OS=Arabidopsis thaliana OX=3702 GN=PPA2 PE=2 SV=2	AT2G18230
27.8602	27.1899	26.4074	27.9127	27.1798	27.3851	27.3165	27.4654	27.9739	27.6048	28.1345	27.4869							19	19	15	57.1	57.1	51.6	43.359	0	109.62	14806000000	24	190	616920000	0.291797	1	-0.187699	-0.68197	P21218;Q42536	P21218	Protochlorophyllide reductase B, chloroplastic	PORB	1300	sp|P21218|PORB_ARATH Protochlorophyllide reductase B, chloroplastic OS=Arabidopsis thaliana OX=3702 GN=PORB PE=1 SV=3	AT4G27440
25.3617	24.2262	NaN	30.2746	30.025	29.6323	26.4203	29.4801	29.2353	29.0601	28.0592	27.9356					+	AP1_WT_ELUATE_AP1_WT_INPUT	32	31	31	68.1	66.9	66.9	62.071	0	323.31	61826000000	31	463	1994400000	2.89147	0.00715611	-3.21734	-4.60362	P21238	P21238	Chaperonin 60 subunit alpha 1, chloroplastic	CPN60A1	1301	sp|P21238|CPNA1_ARATH Chaperonin 60 subunit alpha 1, chloroplastic OS=Arabidopsis thaliana OX=3702 GN=CPN60A1 PE=1 SV=2	AT2G28000
26.7626	26.2453	24.4646	29.8188	29.8946	29.5127	26.2584	29.9624	29.5625	29.7569	28.3083	27.7742					+	AP1_WT_ELUATE_AP1_WT_INPUT	35	35	7	65.7	65.7	14.8	63.808	0	323.31	66441000000	36	460	1845600000	3.64385	0.00182347	-3.11574	-5.60198	P21240;Q9C667	P21240	Chaperonin 60 subunit beta 1, chloroplastic	CPN60B1	1302	sp|P21240|CPNB1_ARATH Chaperonin 60 subunit beta 1, chloroplastic OS=Arabidopsis thaliana OX=3702 GN=CPN60B1 PE=1 SV=3	AT1G55490
26.823	27.3435	27.7477	24.1461	25.9422	25.3165	27.346	25.4304	25.0109	24.7797	28.0645	26.9542					+	AP1_WT_ELUATE_AP1_WT_INPUT	21	10	10	45.4	29.5	29.5	44.546	0	161.77	6170800000	23	125	268300000	4.54181	0.000413095	2.27551	7.21579	P22738	P22738	60S ribosomal protein L3-2	ARP2	1303	sp|P22738|RL32_ARATH 60S ribosomal protein L3-2 OS=Arabidopsis thaliana OX=3702 GN=ARP2 PE=2 SV=4	AT1G61580
32.3246	32.2313	32.5638	33.4944	33.6194	33.4581	32.3013	33.4661	33.417	33.3933	32.539	32.3517					+	AP1_WT_ELUATE_AP1_WT_INPUT	57	57	21	82.6	82.6	40.7	71.357	0	323.31	947300000000	37	2435	25603000000	7.98975	4.34508e-06	-1.08943	-17.0349	P22953	P22953	Probable mediator of RNA polymerase II transcription subunit 37e	MED37E	1304	sp|P22953|HS701_ARATH Heat shock 70 kDa protein 1 OS=Arabidopsis thaliana OX=3702 GN=HSP70-1 PE=1 SV=3	AT5G02500
27.2	27.2053	26.3047	27.176	27.2614	26.9739	27.1827	27.3568	27.237	27.5104	27.0362	27.1766							45	19	17	81	41.3	39.5	71.386	0	70.025	15717000000	36	202	436580000	0.748522	0.454156	-0.23497	-1.44727	P22954;Q9C7X7	P22954	Probable mediator of RNA polymerase II transcription subunit 37c	MED37D	1305	sp|P22954|HS702_ARATH Heat shock 70 kDa protein 2 OS=Arabidopsis thaliana OX=3702 GN=HSP70-2 PE=1 SV=2	AT5G02490
NaN	NaN	24.4269	29.5254	29.2285	30.4636	NaN	30.7877	31.5692	29.399	27.4871	24.976					+	AP1_WT_ELUATE_AP1_WT_INPUT	22	22	9	59.3	59.3	28.3	35.142	0	323.31	62583000000	22	240	2844700000	3.02431	0.00560655	-4.53221	-5.4603	P23321	P23321	Oxygen-evolving enhancer protein 1-1, chloroplastic	PSBO1	1306	sp|P23321|PSBO1_ARATH Oxygen-evolving enhancer protein 1-1, chloroplastic OS=Arabidopsis thaliana OX=3702 GN=PSBO1 PE=1 SV=2	AT5G66570
NaN	NaN	NaN	27.7508	26.9188	27.7505	NaN	27.0748	26.9346	27.0036	25.2829	24.6246					+	AP1_WT_ELUATE_AP1_WT_INPUT	9	9	9	23.4	23.4	23.4	57.61	0	110.36	9692500000	18	89	538470000	3.30325	0.00338525	-2.28511	-6.79478	P23586	P23586	Sugar transport protein 1	STP1	1307	sp|P23586|STP1_ARATH Sugar transport protein 1 OS=Arabidopsis thaliana OX=3702 GN=STP1 PE=1 SV=2	AT1G11260
26.637	26.6345	25.9587	25.9763	25.8774	26.3667	26.2713	25.3429	26.0512	26.208	27.8881	27.9136							23	11	6	64.6	40.2	17	43.158	0	323.31	7001200000	20	73	350060000	1.49314	0.103675	0.913481	2.48752	P23686	P23686	S-adenosylmethionine synthase 1	SAM1	1308	sp|P23686|METK1_ARATH S-adenosylmethionine synthase 1 OS=Arabidopsis thaliana OX=3702 GN=SAM1 PE=1 SV=2	AT1G02500
25.4058	24.9133	NaN	24.9082	24.5048	24.6056	24.736	24.8766	24.9452	24.9706	25.3327	24.6498							10	9	9	37.1	34.4	34.4	34.03	0	16.342	2551900000	19	36	134310000	0.612978	0.591767	0.205695	1.24722	P24100	P24100	Cyclin-dependent kinase A-1	CDKA-1	1309	sp|P24100|CDKA1_ARATH Cyclin-dependent kinase A-1 OS=Arabidopsis thaliana OX=3702 GN=CDKA-1 PE=1 SV=1	AT3G48750
28.0094	28.7703	28.998	27.905	28.5188	28.4605	27.8126	27.915	27.9721	27.8525	28.3235	28.3542							31	6	6	83.6	20.9	20.9	49.823	0	243.32	26055000000	20	208	1302800000	0.61724	0.587008	0.273999	1.2453	P24636	P24636	Tubulin beta-4 chain	TUBB4	1310	sp|P24636|TBB4_ARATH Tubulin beta-4 chain OS=Arabidopsis thaliana OX=3702 GN=TUBB4 PE=2 SV=2	AT5G44340
28.716	28.4959	27.6725	28.8962	29.3963	28.9639	27.7247	28.5894	29.2101	28.914	29.5039	29.1478							27	27	27	84.2	84.2	84.2	47.719	0	323.31	39427000000	25	438	1577100000	0.714646	0.48511	-0.451502	-1.39607	P25696	P25696	Bifunctional enolase 2/transcriptional activator	ENO2	1312	sp|P25696|ENO2_ARATH Bifunctional enolase 2/transcriptional activator OS=Arabidopsis thaliana OX=3702 GN=ENO2 PE=1 SV=1	AT2G36530
NaN	NaN	NaN	25.7753	25.9151	26.3297	NaN	25.8035	25.8968	25.689	25.6859	25.7976							12	12	12	49.4	49.4	49.4	44.463	0	85.29	5222700000	20	77	261140000	0.415915	0.882027	-0.159823	-0.939408	P25697	P25697	Phosphoribulokinase, chloroplastic		1313	sp|P25697|KPPR_ARATH Phosphoribulokinase, chloroplastic OS=Arabidopsis thaliana OX=3702 GN=At1g32060 PE=1 SV=1	AT1G32060
28.0058	26.8449	24.5483	30.65	30.4423	30.4657	26.1272	30.377	30.0016	29.6986	29.3218	28.8953					+	AP1_WT_ELUATE_AP1_WT_INPUT	3	3	3	16.7	16.7	16.7	25.619	0	56.097	109000000000	2	131	54499000000	2.57938	0.0129752	-2.98198	-3.97218	P25818	P25818	Aquaporin TIP1-1;Aquaporin TIP1-1, N-terminally processed	TIP1-1	1315	sp|P25818|TIP11_ARATH Aquaporin TIP1-1 OS=Arabidopsis thaliana OX=3702 GN=TIP1-1 PE=1 SV=1	AT2G36830
NaN	NaN	NaN	26.4361	26.1519	26.5545	NaN	26.6634	26.22	26.6613	26.1884	24.8866							17	7	7	45.5	22.8	22.8	56.931	0	69.026	6715900000	24	78	279830000	1.39978	0.125543	-0.910367	-2.61539	P25819	P25819	Catalase-2	CAT2	1316	sp|P25819|CATA2_ARATH Catalase-2 OS=Arabidopsis thaliana OX=3702 GN=CAT2 PE=1 SV=3	AT4G35090
24.005	NaN	NaN	25.9027	25.5879	25.2115	NaN	25.7697	25.8673	26.6137	26.7218	26.9379							15	15	15	42.2	42.2	42.2	56.062	0	242.24	4590600000	27	134	170020000	0.0321145	1	0.0627356	0.092723	P25853	P25853	Beta-amylase 5	BAM5	1318	sp|P25853|BAM5_ARATH Beta-amylase 5 OS=Arabidopsis thaliana OX=3702 GN=BAM5 PE=2 SV=1	AT4G15210
29.3595	29.2127	29.7679	28.8575	28.9063	29.4291	29.1268	28.8948	29.1519	29.0243	29.6792	29.5166							19	15	7	54.3	44.7	24	42.489	0	323.31	47831000000	25	448	1913300000	1.81399	0.0559295	0.399822	2.91825	P25856	P25856	Glyceraldehyde-3-phosphate dehydrogenase GAPA1, chloroplastic	GAPA1	1319	sp|P25856|G3PA1_ARATH Glyceraldehyde-3-phosphate dehydrogenase GAPA1, chloroplastic OS=Arabidopsis thaliana OX=3702 GN=GAPA1 PE=1 SV=3	AT3G26650
30.1421	30.1268	30.3948	29.9739	29.8933	30.437	29.4883	29.6986	29.8041	29.544	30.1783	29.8287							24	24	20	62.6	62.6	54.1	47.659	0	323.31	69543000000	28	439	2483700000	0.324707	1	0.134696	0.744908	P25857	P25857	Glyceraldehyde-3-phosphate dehydrogenase GAPB, chloroplastic	GAPB	1320	sp|P25857|G3PB_ARATH Glyceraldehyde-3-phosphate dehydrogenase GAPB, chloroplastic OS=Arabidopsis thaliana OX=3702 GN=GAPB PE=1 SV=2	AT1G42970
30.8015	31.1311	31.2311	30.8908	31.4058	31.4245	30.9649	31.1832	31.7206	31.2916	31.456	31.0837							30	30	4	84	84	13.6	36.914	0	323.31	195380000000	21	1116	9304000000	0.73759	0.464605	-0.208042	-1.43081	P25858	P25858	Glyceraldehyde-3-phosphate dehydrogenase GAPC1, cytosolic	GAPC1	1321	sp|P25858|G3PC1_ARATH Glyceraldehyde-3-phosphate dehydrogenase GAPC1, cytosolic OS=Arabidopsis thaliana OX=3702 GN=GAPC1 PE=1 SV=2	AT3G04120
28.1475	27.6765	26.4213	27.3704	26.4695	26.6319	28.2222	27.4755	27.5605	27.142	27.5196	27.5361							14	14	14	58.4	58.4	58.4	22.134	0	151.2	22491000000	11	214	2044600000	0.771208	0.435004	0.478905	1.48123	P25864	P25864	50S ribosomal protein L9, chloroplastic	RPL9	1323	sp|P25864|RK9_ARATH 50S ribosomal protein L9, chloroplastic OS=Arabidopsis thaliana OX=3702 GN=RPL9 PE=2 SV=1	AT3G44890
26.2864	25.2157	NaN	25.3314	24.6336	24.2924	24.8005	25.051	26.0785	25.1142	26.7011	NaN							10	10	10	38.3	38.3	38.3	29.707	0	127.22	7407900000	18	71	411550000	0.711502	0.488342	0.667406	1.4167	P25873	P25873	50S ribosomal protein L15, chloroplastic	RPL15	1324	sp|P25873|RK15_ARATH 50S ribosomal protein L15, chloroplastic OS=Arabidopsis thaliana OX=3702 GN=RPL15 PE=1 SV=2	AT3G25920
27.7061	28.4129	29.0484	28.3114	28.9605	29.0166	28.3734	28.4735	27.0888	28.5698	28.3779	28.4103							13	11	11	35.4	31.8	31.8	28.946	0	213.66	51364000000	11	423	4669500000	0.0157169	1	-0.0152861	-0.0456891	P26568	P26568	Histone H1.1		1325	sp|P26568|H11_ARATH Histone H1.1 OS=Arabidopsis thaliana OX=3702 GN=At1g06760 PE=1 SV=1	AT1G06760
29.8265	30.705	31.1118	30.2889	30.8207	31.1002	29.4442	30.0421	28.5127	29.8998	28.9369	29.738							17	17	15	35.2	35.2	31.5	28.487	0	323.31	137860000000	8	469	17232000000	0.114648	1	-0.150352	-0.303156	P26569	P26569	Histone H1.2		1326	sp|P26569|H12_ARATH Histone H1.2 OS=Arabidopsis thaliana OX=3702 GN=At2g30620 PE=1 SV=1	AT2G30620
27.2285	27.4736	25.4996	28.8566	28.6207	28.981	27.4771	28.3812	28.7548	28.5341	29.1405	28.5055							14	14	7	53	53	27.1	37.449	0	323.31	27972000000	17	268	1645400000	1.27704	0.160626	-1.13392	-2.19553	P27140	P27140	Beta carbonic anhydrase 1, chloroplastic	BCA1	1327	sp|P27140|BCA1_ARATH Beta carbonic anhydrase 1, chloroplastic OS=Arabidopsis thaliana OX=3702 GN=BCA1 PE=1 SV=2	AT3G01500
29.1765	27.9646	26.6133	30.4253	29.4525	29.0377	29.0582	29.884	29.6953	29.4542	29.1519	28.4371							11	11	11	66.5	66.5	66.5	27.733	0	323.31	62368000000	11	357	5669800000	1.71918	0.0670681	-1.25792	-2.79089	P27521	P27521	Chlorophyll a-b binding protein 4, chloroplastic	LHCA4	1331	sp|P27521|CA4_ARATH Chlorophyll a-b binding protein 4, chloroplastic OS=Arabidopsis thaliana OX=3702 GN=LHCA4 PE=1 SV=1	AT3G47470
25.3389	NaN	NaN	25.3422	24.878	25.0329	25.058	25.3814	25.4267	24.8713	25.5269	25.2253							8	8	3	44	44	16	22.396	0	13.954	3852900000	12	29	321070000	0.383463	0.938379	0.131847	0.862423	P28148	P28148	TATA-box-binding protein 2	TBP2	1333	sp|P28148|TBP2_ARATH TATA-box-binding protein 2 OS=Arabidopsis thaliana OX=3702 GN=TBP2 PE=1 SV=1	AT1G55520
24.9562	24.5154	NaN	28.1565	28.9314	28.4495	25.7861	28.5678	28.0646	28.2334	27.5881	27.4772					+	AP1_WT_ELUATE_AP1_WT_INPUT	25	25	25	64.6	64.6	64.6	59.229	0	210.33	29914000000	31	337	964970000	2.48179	0.0154455	-2.33593	-3.96132	P28769	P28769	T-complex protein 1 subunit alpha	CCT1	1337	sp|P28769|TCPA_ARATH T-complex protein 1 subunit alpha OS=Arabidopsis thaliana OX=3702 GN=CCT1 PE=1 SV=1	AT3G20050
24.3279	24.4575	24.2399	29.3715	30.7065	29.881	NaN	30.0686	30.1552	29.7203	26.8762	25.1967					+	AP1_WT_ELUATE_AP1_WT_INPUT	36	36	22	69.3	69.3	47.1	61.28	0	323.31	64743000000	35	392	1849800000	5.49314	9.41777e-05	-4.96418	-10.1302	P29197	P29197	Chaperonin CPN60, mitochondrial	CPN60	1338	sp|P29197|CH60A_ARATH Chaperonin CPN60, mitochondrial OS=Arabidopsis thaliana OX=3702 GN=CPN60 PE=1 SV=2	AT3G23990
32.0602	31.8611	31.8125	22.9461	21.7083	21.9743	31.1877	24.283	24.3778	22.7424	29.5193	31.1487				MIKC_MADS	+	AP1_WT_ELUATE_AP1_WT_INPUT	16	16	6	48.6	48.6	17.9	28.656	0	323.31	22840000000	10	325	2284000000	7.12095	9.61522e-06	8.25961	13.8379	P29382	P29382	Developmental protein SEPALLATA 1	2023-09-01	1340	sp|P29382|SEP1_ARATH Developmental protein SEPALLATA 1 OS=Arabidopsis thaliana OX=3702 GN=SEP1 PE=1 SV=2	AT5G15800
29.3622	29.0941	29.0682	20.9459	20.808	22.4621	29.222	22.3939	22.8786	23.6987	27.6709	29.1457				MIKC_MADS	+	AP1_WT_ELUATE_AP1_WT_INPUT	13	13	13	43.4	43.4	43.4	29.573	0	93.281	4920700000	8	106	615080000	6.8036	1.5402e-05	6.72933	12.8144	P29383	P29383	Agamous-like MADS-box protein AGL3	AGL3	1341	sp|P29383|AGL3_ARATH Agamous-like MADS-box protein AGL3 OS=Arabidopsis thaliana OX=3702 GN=AGL3 PE=1 SV=2	AT2G03710
29.2891	29.1284	28.3654	23.4477	24.8159	22.6734	29.0823	21.6995	22.2208	22.804	27.49	28.4167				MIKC_MADS	+	AP1_WT_ELUATE_AP1_WT_INPUT	15	7	7	48.4	26	26	28.577	0	88.154	4148500000	10	61	414850000	6.12842	3.8505e-05	5.68512	10.8577	P29384	P29384	Developmental protein SEPALLATA 2	2023-09-02	1342	sp|P29384|SEP2_ARATH Developmental protein SEPALLATA 2 OS=Arabidopsis thaliana OX=3702 GN=SEP2 PE=1 SV=1	AT3G02310
NaN	NaN	NaN	22.0575	22.3804	21.7026	24.4468	22.3586	22.121	22.1759	24.4877	NaN				MIKC_MADS	+	AP1_WT_ELUATE_AP1_WT_INPUT	3	2	2	15.4	11.4	11.4	28.156	0	25.839	358430000	10	12	35843000	4.82786	0.000269741	2.33461	12.6632	P29385	P29385	Agamous-like MADS-box protein AGL5	AGL5	1343	sp|P29385|AGL5_ARATH Agamous-like MADS-box protein AGL5 OS=Arabidopsis thaliana OX=3702 GN=AGL5 PE=1 SV=1	AT2G42830
27.06	27.2299	27.458	21.8064	22.1555	20.7698	27.8606	21.5479	22.5926	22.6543	25.7503	27.5281				MIKC_MADS	+	AP1_WT_ELUATE_AP1_WT_INPUT	10	10	10	50.8	50.8	50.8	28.744	0	49.401	2367900000	11	57	215260000	6.70442	1.68967e-05	5.22674	12.5088	P29386	P29386	Agamous-like MADS-box protein AGL6	AGL6	1344	sp|P29386|AGL6_ARATH Agamous-like MADS-box protein AGL6 OS=Arabidopsis thaliana OX=3702 GN=AGL6 PE=1 SV=2	AT2G45650
27.1601	27.1816	26.4908	29.7945	30.4588	30.535	26.5072	30.3215	30.4444	29.912	28.5004	28.1105					+	AP1_WT_ELUATE_AP1_WT_INPUT	22	22	15	44.3	44.3	32.6	60.485	0	323.31	88439000000	32	358	2763700000	4.97462	0.000212646	-2.91925	-8.09628	P29402	P29402	Calnexin homolog 1	CNX1	1345	sp|P29402|CALX1_ARATH Calnexin homolog 1 OS=Arabidopsis thaliana OX=3702 GN=CNX1 PE=1 SV=1	AT5G61790
27.5337	28.0502	28.0057	27.3723	27.4934	27.4663	27.2283	27.0896	27.2295	27.3746	27.9636	27.9836					+	AP1_WT_ELUATE_AP1_WT_INPUT	31	2	2	80.2	11.6	11.6	49.537	0	59.236	14130000000	21	59	672860000	1.89966	0.0473684	0.45656	3.03361	P29511	P29511	Tubulin alpha-6 chain	TUBA6	1346	sp|P29511|TBA6_ARATH Tubulin alpha-6 chain OS=Arabidopsis thaliana OX=3702 GN=TUBA6 PE=1 SV=1	AT4G14960
26.823	27.3421	26.6231	26.5733	26.8341	27.2385	26.6539	26.5933	26.972	27.1268	27.5738	27.3697							29	8	6	77.5	27.6	19.4	50.342	0	150.82	9715800000	21	119	462660000	0.389099	0.928533	0.174581	0.863251	P29513	P29513	Tubulin beta-5 chain	TUBB5	1347	sp|P29513|TBB5_ARATH Tubulin beta-5 chain OS=Arabidopsis thaliana OX=3702 GN=TUBB5 PE=2 SV=1	AT1G20010
27.1158	27.7841	27.8724	26.3535	26.8658	26.9353	26.727	26.5823	26.7975	26.9426	27.617	27.8901					+	AP1_WT_ELUATE_AP1_WT_INPUT	30	9	7	79.3	29.2	24.9	50.585	0	104.54	11617000000	21	159	553180000	2.23576	0.0248307	0.75492	3.49125	P29514	P29514	Tubulin beta-6 chain	TUBB6	1348	sp|P29514|TBB6_ARATH Tubulin beta-6 chain OS=Arabidopsis thaliana OX=3702 GN=TUBB6 PE=2 SV=1	AT5G12250
30.0651	30.4758	30.4839	29.24	29.4151	29.796	30.1501	29.2437	29.4938	29.3337	30.4249	30.3609					+	AP1_WT_ELUATE_AP1_WT_INPUT	32	10	4	82	33.6	14.9	50.747	0	323.31	67380000000	21	505	3208600000	4.97891	0.000211565	0.906376	8.10541	P29515	P29515	Tubulin beta-7 chain	TUBB7	1349	sp|P29515|TBB7_ARATH Tubulin beta-7 chain OS=Arabidopsis thaliana OX=3702 GN=TUBB7 PE=2 SV=1	AT2G29550
NaN	26.0356	NaN	25.755	25.8017	26.193	NaN	25.5814	25.8373	25.8057	26.3425	26.3495							31	3	3	79.3	9.4	9.4	50.606	0	35.779	4816900000	21	36	229380000	1.70409	0.0690486	0.413514	3.00628	P29516	P29516	Tubulin beta-8 chain	TUBB8	1350	sp|P29516|TBB8_ARATH Tubulin beta-8 chain OS=Arabidopsis thaliana OX=3702 GN=TUBB8 PE=2 SV=2	AT5G23860
27.6	28.1925	28.3321	27.3484	28.1109	28.0375	27.5111	27.4964	27.408	27.6838	28.0163	28.2327							31	8	4	84.2	32.4	14.2	49.657	0	321.73	15673000000	20	221	783640000	0.814683	0.398202	0.299934	1.54567	P29517	P29517	Tubulin beta-9 chain	TUBB9	1351	sp|P29517|TBB9_ARATH Tubulin beta-9 chain OS=Arabidopsis thaliana OX=3702 GN=TUBB9 PE=1 SV=1	AT4G20890
25.8071	26.1917	25.2892	26.2884	26.7486	26.876	25.8801	26.2894	26.6661	26.2876	26.3906	25.9516					+	AP1_WT_ELUATE_AP1_WT_INPUT	19	15	14	42.1	35.4	33.7	57.978	0	76.236	7581100000	30	129	252700000	2.03602	0.0363308	-0.607602	-3.21815	P29976	P29976	Phospho-2-dehydro-3-deoxyheptonate aldolase 1, chloroplastic	DHS1	1352	sp|P29976|AROF_ARATH Phospho-2-dehydro-3-deoxyheptonate aldolase 1, chloroplastic OS=Arabidopsis thaliana OX=3702 GN=DHS1 PE=2 SV=2	AT4G39980
NaN	NaN	NaN	22.0821	23.8067	21.8617	25.2402	24.2176	22.4642	24.3837	24.9646	25.366							15	6	6	18.3	8.6	8.6	102.8	0	8.4942	2210700000	51	10	43348000	1.71701	0.0673042	2.05428	3.02735	P30181;B3H4K2	P30181	DNA topoisomerase 1	TOP1	1353	sp|P30181|TOP1A_ARATH DNA topoisomerase 1 alpha OS=Arabidopsis thaliana OX=3702 GN=TOP1A PE=1 SV=1	AT5G55300
23.8822	24.5672	NaN	27.2781	28.1876	27.6214	23.5237	27.7371	27.6792	27.6499	27.8107	27.1716							23	23	16	70.4	70.4	53.7	54.509	0	272.28	16045000000	29	213	553280000	1.72606	0.066193	-2.30111	-2.85967	P30184	P30184	Leucine aminopeptidase 1	PM25	1355	sp|P30184|AMPL1_ARATH Leucine aminopeptidase 1 OS=Arabidopsis thaliana OX=3702 GN=LAP1 PE=1 SV=1	AT2G24200
26.4894	26.1407	28.325	27.8452	28.1515	27.5741	26.3219	28.0921	28.0419	28.1468	27.0093	27.0557					+	AP1_WT_ELUATE_AP1_WT_INPUT	13	13	4	63.6	63.6	26.4	27.337	0	251.56	15459000000	15	138	1030600000	2.03863	0.0361816	-1.08491	-3.22168	P30186	P30186	Proteasome subunit alpha type-7-A	PAD1	1356	sp|P30186|PSA7A_ARATH Proteasome subunit alpha type-7-A OS=Arabidopsis thaliana OX=3702 GN=PAD1 PE=1 SV=1	AT3G51260
32.703	32.367	31.6483	32.4304	32.4739	32.3344	32.1368	31.6798	32.2899	31.8461	32.0401	32.3816							31	31	18	55.9	55.9	35.7	41.475	0	323.31	396280000000	22	938	18013000000	0.0673847	1	0.0370687	0.185849	P31167	P31167	ADP,ATP carrier protein 1, mitochondrial	AAC1	1359	sp|P31167|ADT1_ARATH ADP,ATP carrier protein 1, mitochondrial OS=Arabidopsis thaliana OX=3702 GN=AAC1 PE=1 SV=2	AT3G08580
26.9602	26.5104	NaN	27.2827	27.1641	27.4015	26.8521	26.5034	27.0277	26.7907	28.2807	27.5772							9	9	9	52.4	52.4	52.4	18.91	0	144.89	12689000000	9	109	1409900000	0.27389	1	0.207778	0.649493	P31265	P31265	Translationally-controlled tumor protein homolog	TCTP	1360	sp|P31265|TCTP1_ARATH Translationally-controlled tumor protein 1 OS=Arabidopsis thaliana OX=3702 GN=TCTP1 PE=1 SV=2	AT3G16640
28.9521	28.8706	27.892	33.3066	33.2171	33.4212	28.1087	33.1951	32.9459	32.8569	30.4746	29.7169					+	AP1_WT_ELUATE_AP1_WT_INPUT	31	31	31	40.5	40.5	40.5	80.819	0	323.31	590780000000	27	690	21881000000	5.88405	5.31532e-05	-4.15466	-10.2163	P31414	P31414	Pyrophosphate-energized vacuolar membrane proton pump 1	AVP1	1361	sp|P31414|AVP1_ARATH Pyrophosphate-energized vacuolar membrane proton pump 1 OS=Arabidopsis thaliana OX=3702 GN=AVP1 PE=1 SV=1	AT1G15690
29.495	29.0532	29.6118	27.5355	27.2353	27.3382	30.8293	27.1799	27.1863	27.4044	28.8784	29.5017					+	AP1_WT_ELUATE_AP1_WT_INPUT	19	19	17	64.7	64.7	59	38.152	0	296.09	20233000000	18	323	1124000000	4.87236	0.000247765	2.24829	7.88145	P32961;P32962	P32961	Nitrilase 1	NIT1	1364	sp|P32961|NRL1_ARATH Nitrilase 1 OS=Arabidopsis thaliana OX=3702 GN=NIT1 PE=1 SV=2	AT3G44310
25.0365	25.1422	NaN	25.763	26.3887	26.2729	25.0876	25.5726	25.2991	25.5226	26.1025	25.5026							11	11	11	44.8	44.8	44.8	33.548	0	158.85	5604200000	16	72	350260000	0.846235	0.374713	-0.428867	-1.60715	P33207	P33207	3-oxoacyl-[acyl-carrier-protein] reductase, chloroplastic		1365	sp|P33207|FABG_ARATH 3-oxoacyl-[acyl-carrier-protein] reductase, chloroplastic OS=Arabidopsis thaliana OX=3702 GN=At1g24360 PE=1 SV=2	AT1G24360
NaN	26.3946	NaN	27.4046	27.9064	27.533	25.749	27.5483	27.5955	27.2937	26.9981	26.8646					+	AP1_WT_ELUATE_AP1_WT_INPUT	12	12	5	68.3	68.3	25.2	30.476	0	279.48	14707000000	16	156	919210000	2.54153	0.0138794	-1.04538	-4.23063	P34066	P34066	Proteasome subunit alpha type-1-A	PAF1	1367	sp|P34066|PSA1A_ARATH Proteasome subunit alpha type-1-A OS=Arabidopsis thaliana OX=3702 GN=PAF1 PE=1 SV=3	AT5G42790
30.342	30.3067	30.333	30.0822	29.7807	29.8027	29.7712	30.1914	31.0222	29.8067	30.5967	29.9083							10	10	10	57.2	57.2	57.2	17.545	0	244	109120000000	8	393	13640000000	0.161551	1	0.0953159	0.411532	P34788	P34788	40S ribosomal protein S18	RPS18A	1368	sp|P34788|RS18_ARATH 40S ribosomal protein S18 OS=Arabidopsis thaliana OX=3702 GN=RPS18C PE=1 SV=1	AT1G22780
23.5146	NaN	NaN	24.998	25.1041	24.4733	NaN	25.0451	26.622	26.0464	26.1991	26.4863							8	8	4	64	64	34.3	18.373	0	38.555	4127900000	11	56	375270000	0.00801556	1	0.0185258	0.0237527	P34790	P34790	Peptidyl-prolyl cis-trans isomerase CYP18-3	CYP18-3	1370	sp|P34790|CP18C_ARATH Peptidyl-prolyl cis-trans isomerase CYP18-3 OS=Arabidopsis thaliana OX=3702 GN=CYP18-3 PE=1 SV=1	AT4G38740
23.6367	NaN	NaN	23.1993	22.7512	22.869	NaN	22.5069	23.4368	23.0871	25.3719	25.0027					+	AP1_WT_ELUATE_AP1_WT_INPUT	4	4	4	28.8	28.8	28.8	28.208	0	15.238	879610000	18	18	48867000	2.42104	0.0174036	1.69537	4.25007	P34791	P34791	Peptidyl-prolyl cis-trans isomerase CYP20-3, chloroplastic	CYP20-3	1371	sp|P34791|CP20C_ARATH Peptidyl-prolyl cis-trans isomerase CYP20-3, chloroplastic OS=Arabidopsis thaliana OX=3702 GN=CYP20-3 PE=1 SV=1	AT3G62030
NaN	NaN	NaN	26.8303	26.4371	26.4218	NaN	26.184	26.1712	26.5047	26.0081	25.656							18	18	11	38.2	38.2	25.8	78.725	0	66.705	6905600000	39	66	177070000	1.61041	0.0833778	-0.592756	-2.98354	P35510;Q9SS45;P45725	P35510	Phenylalanine ammonia-lyase 1	PAL1	1376	sp|P35510|PAL1_ARATH Phenylalanine ammonia-lyase 1 OS=Arabidopsis thaliana OX=3702 GN=PAL1 PE=1 SV=3	AT2G37040
34.7659	34.5462	34.0678	26.412	24.8934	23.5241	34.4827	26.7095	26.5294	25.6793	32.5326	33.9759				MIKC_MADS	+	AP1_WT_ELUATE_AP1_WT_INPUT	15	15	14	46.9	46.9	43.8	30.182	0	323.31	214610000000	8	1139	26826000000	7.18397	9.14813e-06	8.43722	14.0497	P35631	P35631	Floral homeotic protein APETALA 1	AP1	1378	sp|P35631|AP1_ARATH Floral homeotic protein APETALA 1 OS=Arabidopsis thaliana OX=3702 GN=AP1 PE=1 SV=2	AT1G69120
30.3193	31.0216	31.2438	25.8802	25.7701	25.0125	31.3676	25.2187	24.1561	25.8496	29.18	31.0715				MIKC_MADS	+	AP1_WT_ELUATE_AP1_WT_INPUT	12	12	12	54.7	54.7	54.7	27.341	0	275.42	18481000000	12	237	1540000000	6.6562	1.81404e-05	5.38612	12.3626	P35632	P35632	Floral homeotic protein APETALA 3	AP3	1379	sp|P35632|AP3_ARATH Floral homeotic protein APETALA 3 OS=Arabidopsis thaliana OX=3702 GN=AP3 PE=1 SV=1	AT3G54340
29.4853	28.6391	27.695	30.1404	29.3896	28.8593	29.2694	27.9366	27.4499	27.771	30.4797	29.4596							10	10	10	57.8	57.8	57.8	19.682	0	273.63	62063000000	11	297	5642100000	0.473871	0.786059	0.580187	1.01103	P36212;P36210	P36212;P36210	50S ribosomal protein L12-3, chloroplastic;50S ribosomal protein L12-1, chloroplastic	RPL12C;RPL12A	1380	sp|P36212|RK123_ARATH 50S ribosomal protein L12-3, chloroplastic OS=Arabidopsis thaliana OX=3702 GN=RPL12C PE=2 SV=2;sp|P36210|RK121_ARATH 50S ribosomal protein L12-1, chloroplastic OS=Arabidopsis thaliana OX=3702 GN=RPL12A PE=2 SV=1	AT3G27830;AT3G27850
28.2863	27.9454	27.0676	28.3805	28.2546	28.2317	27.6374	27.9028	28.3368	28.1643	28.253	28.1584							11	11	11	74.6	74.6	74.6	20.622	0	136.5	28638000000	10	298	2863800000	0.831943	0.385347	-0.320436	-1.57103	Q6ID97;P36397;Q9M1P5;Q9LYJ3;Q9LQC8;P0DH91	Q6ID97;P36397;Q9M1P5;Q9LYJ3;Q9LQC8;P0DH91	ADP-ribosylation factor 1;ADP-ribosylation factor 2-A;ADP-ribosylation factor 2-B	ARFA1F;ARF1;T17J13.250;T15N1_160;ARF2-A;ARF2-B	1381	tr|Q6ID97|Q6ID97_ARATH ADP-ribosylation factor A1F OS=Arabidopsis thaliana OX=3702 GN=ARFA1F PE=2 SV=1;sp|P36397|ARF1_ARATH ADP-ribosylation factor 1 OS=Arabidopsis thaliana OX=3702 GN=ARF1 PE=1 SV=2;tr|Q9M1P5|Q9M1P5_ARATH ADP-ribosylation factor A1E OS=Ar	AT1G10630;AT1G23490;AT1G70490;AT2G47170;AT3G62290;AT5G14670
NaN	NaN	NaN	26.2885	26.0854	26.0875	NaN	26.8198	26.8127	26.771	26.7201	26.1379							27	27	27	38.1	38.1	38.1	110.49	0	120.38	7869100000	54	105	145720000	0.0564318	1	-0.0484877	-0.159977	P36428	P36428	Alanine--tRNA ligase	ALATS	1382	sp|P36428|SYA_ARATH Alanine--tRNA ligase OS=Arabidopsis thaliana OX=3702 GN=ALATS PE=1 SV=3	AT1G50200
NaN	23.1436	NaN	22.3547	22.7261	22.6966	NaN	23.2078	23.2104	23.3339	23.968	22.9419							8	8	8	18.8	18.8	18.8	61.232	0	13.948	887680000	31	18	28635000	0.683943	0.515085	0.429576	1.3903	P37107	P37107	Signal recognition particle 54 kDa protein, chloroplastic	FFC	1383	sp|P37107|SR54C_ARATH Signal recognition particle 54 kDa protein, chloroplastic OS=Arabidopsis thaliana OX=3702 GN=FFC PE=1 SV=1	AT5G03940
26.1186	24.1406	25.2959	30.4164	30.2401	31.2365	25.4306	30.3695	30.9226	31.0837	28.6886	27.7713					+	AP1_WT_ELUATE_AP1_WT_INPUT	21	20	20	49	47	47	61.132	0	323.31	104920000000	27	445	3885800000	4.03995	0.000901783	-4.47055	-6.28178	P37702	P37702	Myrosinase 1	TGG1	1385	sp|P37702|BGL38_ARATH Myrosinase 1 OS=Arabidopsis thaliana OX=3702 GN=TGG1 PE=1 SV=1	AT5G26000
27.716	27.9298	26.4519	30.1397	30.1173	30.8739	28.5882	30.6691	30.7063	30.7212	29.6746	29.4537					+	AP1_WT_ELUATE_AP1_WT_INPUT	53	53	53	75.1	75.1	75.1	102.04	0	323.31	111840000000	55	754	2033400000	2.87824	0.00732961	-2.23554	-4.40554	P38418	P38418	Lipoxygenase 2, chloroplastic	LOX2	1387	sp|P38418|LOX2_ARATH Lipoxygenase 2, chloroplastic OS=Arabidopsis thaliana OX=3702 GN=LOX2 PE=1 SV=1	AT3G45140
28.6407	29.084	29.026	30.0552	29.6665	29.5292	28.859	29.1878	29.4191	29.5666	28.6819	29.0318					+	AP1_WT_ELUATE_AP1_WT_INPUT	57	57	57	52.9	52.9	52.9	135.02	0	323.31	80895000000	61	680	1326100000	3.16774	0.00425848	-0.683505	-4.84185	P38420	P38420	DNA-directed RNA polymerase II subunit 2	NRPB2	1388	sp|P38420|NRPB2_ARATH DNA-directed RNA polymerase II subunit 2 OS=Arabidopsis thaliana OX=3702 GN=NRPB2 PE=1 SV=2	AT4G21710
26.4727	25.9714	26.4353	26.3648	26.0297	26.3565	25.7025	26.2083	26.314	26.453	26.4905	26.4751							19	19	19	66.5	66.5	66.5	53.246	0	71.017	6889700000	25	131	275590000	0.0719899	1	-0.0297845	-0.197692	P38557;P38558	P38557;P38558	Tubulin gamma-1 chain;Tubulin gamma-2 chain	TUBG1;TUBG2	1390	sp|P38557|TBG1_ARATH Tubulin gamma-1 chain OS=Arabidopsis thaliana OX=3702 GN=TUBG1 PE=1 SV=1;sp|P38558|TBG2_ARATH Tubulin gamma-2 chain OS=Arabidopsis thaliana OX=3702 GN=TUBG2 PE=1 SV=1	AT3G61650;AT5G05620
30.5481	30.6974	30.9053	29.3151	28.8872	29.0229	30.3109	29.1153	28.481	29.2061	30.458	30.3198					+	AP1_WT_ELUATE_AP1_WT_INPUT	7	7	2	35	35	9.2	18.632	0	177.75	84664000000	5	335	16933000000	5.8091	5.77939e-05	1.53533	10.0261	P38666	P38666	60S ribosomal protein L24-2	RPL24B	1392	sp|P38666|RL242_ARATH 60S ribosomal protein L24-2 OS=Arabidopsis thaliana OX=3702 GN=RPL24B PE=1 SV=2	AT3G53020
25.8624	NaN	NaN	27.2178	27.5436	27.4334	25.0362	26.4047	27.3922	27.0511	27.1537	26.4542							10	10	10	79.9	79.9	79.9	16.5	0	134.29	11323000000	9	115	1258100000	1.45483	0.112122	-1.04719	-2.53304	P39207	P39207	Nucleoside diphosphate kinase 1	NDK1	1393	sp|P39207|NDK1_ARATH Nucleoside diphosphate kinase 1 OS=Arabidopsis thaliana OX=3702 GN=NDK1 PE=1 SV=1	AT4G09320
NaN	NaN	NaN	22.9609	21.1989	22.6986	NaN	22.7517	22.2377	23.1721	24.2425	24.2191							6	6	6	27.4	27.4	27.4	23.636	0	10.804	950010000	7	33	135720000	1.76273	0.0617243	1.72748	3.25906	P39697	P39697	40S ribosomal protein S19, mitochondrial	RPS19	1394	sp|P39697|RT19_ARATH 40S ribosomal protein S19, mitochondrial OS=Arabidopsis thaliana OX=3702 GN=RPS19 PE=1 SV=2	AT5G47320
28.5133	29.3002	29.0941	30.6277	31.4292	31.4148	28.8378	30.9512	30.6542	30.8935	28.4806	28.7443					+	AP1_WT_ELUATE_AP1_WT_INPUT	14	14	14	29.4	29.4	29.4	58.007	0	323.31	182540000000	28	520	6519400000	6.20775	3.51107e-05	-2.16672	-11.0732	P40602	P40602	Anther-specific proline-rich protein APG	APG	1396	sp|P40602|APG_ARATH Anther-specific proline-rich protein APG OS=Arabidopsis thaliana OX=3702 GN=APG PE=2 SV=2	AT1G20130
29.3883	29.5702	29.27	29.8355	30.1597	29.8982	29.659	30.0752	30.279	29.6785	29.5251	29.8268					+	AP1_WT_ELUATE_AP1_WT_INPUT	21	9	8	44.9	20.5	17.1	41.745	0	38.882	75705000000	19	140	3984500000	2.37743	0.0189021	-0.447764	-3.6876	P40941	P40941	ADP,ATP carrier protein 2, mitochondrial	AAC2	1398	sp|P40941|ADT2_ARATH ADP,ATP carrier protein 2, mitochondrial OS=Arabidopsis thaliana OX=3702 GN=AAC2 PE=1 SV=2	AT5G13490
NaN	NaN	NaN	24.0439	24.0721	24.0183	NaN	23.6617	23.7204	24.1786	24.9231	24.1289							5	5	5	25.6	25.6	25.6	26.595	0	20.01	1432200000	16	32	89510000	1.25726	0.166661	0.57686	2.37289	P41088	P41088	Chalcone--flavonone isomerase 1	CHI1	1399	sp|P41088|CFI1_ARATH Chalcone--flavanone isomerase 1 OS=Arabidopsis thaliana OX=3702 GN=CHI1 PE=1 SV=2	AT3G55120
31.6349	31.1466	30.7908	29.6307	28.962	29.0641	30.2145	29.6777	29.8477	29.9328	33.1812	30.9514					+	AP1_WT_ELUATE_AP1_WT_INPUT	18	18	11	61.2	61.2	39.3	23.767	0	323.31	218240000000	10	512	21824000000	2.60224	0.0124358	1.80073	4.00479	P41127;Q9SMT4	P41127	60S ribosomal protein L13-1	RPL13B	1400	sp|P41127|RL131_ARATH 60S ribosomal protein L13-1 OS=Arabidopsis thaliana OX=3702 GN=RPL13B PE=1 SV=1	AT3G49010
28.3333	28.3834	27.8592	27.9397	28.4481	28.4612	28.7746	27.8261	28.4651	27.9027	28.563	28.5946							34	8	7	86.9	27.2	25	46.704	0	323.31	28486000000	23	195	1238500000	0.679853	0.518726	0.244183	1.34286	P41376	P41376	Eukaryotic initiation factor 4A-1	TIF4A-1	1401	sp|P41376|IF4A1_ARATH Eukaryotic initiation factor 4A-1 OS=Arabidopsis thaliana OX=3702 GN=EIF4A1 PE=1 SV=1	AT3G13920
30.5819	30.9519	30.7815	31.1428	31.5847	31.4237	30.9557	31.1922	31.3667	31.364	31.2661	30.9071					+	AP1_WT_ELUATE_AP1_WT_INPUT	36	36	10	90	90	30.3	46.762	0	323.31	219170000000	23	1058	9529300000	2.51227	0.0146609	-0.438336	-3.87695	P41377	P41377	Eukaryotic initiation factor 4A-2	TIF4A-2	1402	sp|P41377|IF4A2_ARATH Eukaryotic initiation factor 4A-2 OS=Arabidopsis thaliana OX=3702 GN=TIF4A-2 PE=1 SV=1	AT1G54270
28.3116	28.2866	28.6786	28.252	27.8745	28.0527	28.2598	27.8359	28.2271	28.2903	28.6683	28.6979					+	AP1_WT_ELUATE_AP1_WT_INPUT	13	13	13	74.7	74.7	74.7	25.276	0	241.68	27810000000	13	252	2139300000	2.08438	0.0332864	0.395027	3.28392	P41916;Q8H156;P41917	P41916;Q8H156;P41917	GTP-binding nuclear protein Ran-1;GTP-binding nuclear protein Ran-3;GTP-binding nuclear protein Ran-2	RAN1;RAN3;RAN2	1403	sp|P41916|RAN1_ARATH GTP-binding nuclear protein Ran-1 OS=Arabidopsis thaliana OX=3702 GN=RAN1 PE=1 SV=1;sp|Q8H156|RAN3_ARATH GTP-binding nuclear protein Ran-3 OS=Arabidopsis thaliana OX=3702 GN=RAN3 PE=1 SV=2;sp|P41917|RAN2_ARATH GTP-binding nuclear prote	AT5G20010;AT5G20020;AT5G55190
27.3484	27.4238	26.612	26.2692	25.8021	26.2561	27.6683	26.7817	27.0355	26.5722	27.7154	27.5587					+	AP1_WT_ELUATE_AP1_WT_INPUT	13	4	4	69.3	34	34	16.238	0	34.312	11278000000	6	80	1879700000	2.48681	0.0153224	0.934976	3.841	P42036	P42036	40S ribosomal protein S14-3	RPS14C	1404	sp|P42036|RS143_ARATH 40S ribosomal protein S14-3 OS=Arabidopsis thaliana OX=3702 GN=RPS14C PE=2 SV=2	AT3G52580
24.8417	24.7424	NaN	22.4711	24.29	23.7846	27.784	24.7828	24.9832	25.4228	27.7475	27.0733							29	28	28	38.2	37.2	37.2	122.51	0	76.116	4369500000	64	97	68273000	1.65231	0.0765152	2.14873	2.7557	P42498	P42498	Phytochrome E	PHYE	1408	sp|P42498|PHYE_ARATH Phytochrome E OS=Arabidopsis thaliana OX=3702 GN=PHYE PE=1 SV=2	AT4G18130
27.5898	27.4162	25.7563	28.9612	29.2261	28.9918	27.1704	28.5476	28.9115	28.291	28.6681	28.3347					+	AP1_WT_ELUATE_AP1_WT_INPUT	21	14	12	74.9	54.7	50.2	29.931	0	323.31	35067000000	18	304	1948200000	1.89663	0.0476143	-1.33228	-3.02953	P42643	P42643	14-3-3-like protein GF14 chi	GRF1	1409	sp|P42643|14331_ARATH 14-3-3-like protein GF14 chi OS=Arabidopsis thaliana OX=3702 GN=GRF1 PE=1 SV=3	AT4G09000
25.3985	25.6861	NaN	27.347	28.6255	27.9096	26.672	27.6613	27.6561	27.3636	27.3782	27.5119							19	13	13	73.7	59.2	59.2	28.606	0	323.31	17327000000	15	221	1155100000	1.66921	0.0738372	-1.23118	-2.7795	P42644	P42644	14-3-3-like protein GF14 psi	GRF3	1410	sp|P42644|14333_ARATH 14-3-3-like protein GF14 psi OS=Arabidopsis thaliana OX=3702 GN=GRF3 PE=1 SV=2	AT5G38480
26.6123	26.0129	NaN	28.9031	29.1239	29.3153	26.6241	28.3038	28.6762	28.398	28.2765	27.8806					+	AP1_WT_ELUATE_AP1_WT_INPUT	19	15	7	70.5	61.2	36.2	30.182	0	323.31	34142000000	17	246	2008400000	2.51338	0.0146401	-1.70545	-4.00947	P42645	P42645	14-3-3-like protein GF14 upsilon	GRF5	1411	sp|P42645|14335_ARATH 14-3-3-like protein GF14 upsilon OS=Arabidopsis thaliana OX=3702 GN=GRF5 PE=1 SV=2	AT5G16050
31.1875	30.9706	30.7478	31.9352	31.7826	31.8153	31.7649	31.5512	31.4389	31.5134	30.2935	31.525							58	58	50	80.2	80.2	75.9	68.171	0	323.31	268880000000	41	1407	6558100000	1.53783	0.0949987	-0.591213	-2.54757	P42697	P42697	Dynamin-related protein 1A	DRP1A	1412	sp|P42697|DRP1A_ARATH Phragmoplastin DRP1A OS=Arabidopsis thaliana OX=3702 GN=DRP1A PE=1 SV=3	AT5G42080
NaN	NaN	NaN	26.8513	27.8358	27.5198	25.5694	27.7135	27.409	27.7725	25.2653	NaN					+	AP1_WT_ELUATE_AP1_WT_INPUT	21	21	19	43.6	43.6	38.6	68.672	0	323.31	19862000000	29	198	684880000	3.5346	0.00225371	-2.09962	-7.49321	P42731	P42731	Polyadenylate-binding protein 2	PAB2	1413	sp|P42731|PABP2_ARATH Polyadenylate-binding protein 2 OS=Arabidopsis thaliana OX=3702 GN=PAB2 PE=1 SV=1	AT4G34110
28.1961	27.7903	27.4606	27.1782	25.4847	26.5082	27.7272	27.8862	27.9731	27.5602	28.1273	27.6136							13	13	13	49.7	49.7	49.7	19.096	0	132.82	22680000000	9	182	2520000000	0.969973	0.290562	0.720771	1.76996	P42732	P42732	30S ribosomal protein S13, chloroplastic	RPS13	1414	sp|P42732|RR13_ARATH 30S ribosomal protein S13, chloroplastic OS=Arabidopsis thaliana OX=3702 GN=RPS13 PE=2 SV=1	AT5G14320
28.7006	29.1207	28.1634	28.7636	28.5291	28.0559	30.1732	27.7776	27.1999	27.3981	29.9399	29.7622					+	AP1_WT_ELUATE_AP1_WT_INPUT	16	9	9	62.3	30.2	30.2	17.749	0	154.14	37481000000	9	163	4164500000	2.11829	0.0311769	1.35595	3.33017	P42733	P42733	40S ribosomal protein S11-3	RPS11C	1415	sp|P42733|RS113_ARATH 40S ribosomal protein S11-3 OS=Arabidopsis thaliana OX=3702 GN=RPS11C PE=2 SV=2	AT5G23740
27.4452	26.6709	NaN	27.8609	28.3485	28.2855	27.4494	27.7368	28.582	28.404	29.0239	28.862							23	23	23	81.1	81.1	81.1	38.933	0	323.31	24073000000	20	287	1203600000	0.308904	1	-0.312652	-0.717927	P42734	P42734	Probable cinnamyl alcohol dehydrogenase 9	CAD9	1416	sp|P42734|CADH9_ARATH Probable cinnamyl alcohol dehydrogenase 9 OS=Arabidopsis thaliana OX=3702 GN=CAD9 PE=2 SV=2	AT4G39330
NaN	NaN	NaN	25.475	24.6972	24.5982	NaN	24.3337	25.0525	24.2888	25.4508	24.3294							11	4	4	46.5	19.3	19.3	36.615	0	50.191	1580500000	18	28	87808000	0.130803	1	0.149206	0.347696	P42737	P42737	Beta carbonic anhydrase 2, chloroplastic	BCA2	1417	sp|P42737|BCA2_ARATH Beta carbonic anhydrase 2, chloroplastic OS=Arabidopsis thaliana OX=3702 GN=BCA2 PE=1 SV=3	AT5G14740
NaN	NaN	NaN	26.6843	27.5657	26.9401	24.8086	27.2951	27.0902	27.2848	25.9038	25.898					+	AP1_WT_ELUATE_AP1_WT_INPUT	9	9	9	53.4	53.4	53.4	24.644	0	104.08	10102000000	13	110	777070000	2.96379	0.00631089	-1.60655	-5.33042	P42742	P42742	Proteasome subunit beta type-1	PBF1	1418	sp|P42742|PSB1_ARATH Proteasome subunit beta type-1 OS=Arabidopsis thaliana OX=3702 GN=PBF1 PE=1 SV=2	AT3G60820
29.792	29.6851	29.1656	29.0835	28.544	28.5281	30.0632	28.244	28.4441	28.4766	30.2098	29.92					+	AP1_WT_ELUATE_AP1_WT_INPUT	17	7	7	60.4	28.9	28.9	20.925	0	61.107	45018000000	10	209	4501800000	4.24662	0.000653925	1.25253	6.65592	P42791;O22254	P42791	60S ribosomal protein L18-2	RPL18B	1421	sp|P42791|RL182_ARATH 60S ribosomal protein L18-2 OS=Arabidopsis thaliana OX=3702 GN=RPL18B PE=1 SV=2	AT3G05590
31.5467	31.766	32.2749	31.6515	31.4368	31.2198	32.2469	31.4896	31.2494	31.604	32.0031	32.2573					+	AP1_WT_ELUATE_AP1_WT_INPUT	15	15	15	64.3	64.3	64.3	20.831	0	300.57	313680000000	7	674	44812000000	2.59283	0.0126239	0.573959	3.99136	P42795;P42794	P42795;P42794	60S ribosomal protein L11-1;60S ribosomal protein L11-2	RPL11A;RPL11B	1424	sp|P42795|RL111_ARATH 60S ribosomal protein L11-1 OS=Arabidopsis thaliana OX=3702 GN=RPL11A PE=2 SV=2;sp|P42794|RL112_ARATH 60S ribosomal protein L11-2 OS=Arabidopsis thaliana OX=3702 GN=RPL11D PE=2 SV=2	AT2G42740;AT3G58700
30.7926	31.0142	30.9593	30.2656	30.5022	30.3578	30.8287	29.6875	30.1239	29.412	31.1237	30.6586					+	AP1_WT_ELUATE_AP1_WT_INPUT	13	13	3	78.5	78.5	26.2	14.804	0	315.42	122640000000	8	300	15330000000	2.95616	0.00638734	0.838019	4.52125	P42798;O80646	P42798	40S ribosomal protein S15a-1	RPS15AA	1426	sp|P42798|R15A1_ARATH 40S ribosomal protein S15a-1 OS=Arabidopsis thaliana OX=3702 GN=RPS15AF PE=2 SV=2	AT1G07770
25.6469	25.3149	26.7222	26.0649	26.1779	26.5787	26.0931	26.5763	27.0351	26.8644	26.0287	26.7828							23	12	12	66.3	46.5	46.5	46.438	0	289.09	9533900000	18	86	529660000	0.851427	0.370492	-0.451429	-1.59951	P42825	P42825	Chaperone protein dnaJ 2	ATJ2	1430	sp|P42825|DNAJ2_ARATH Chaperone protein dnaJ 2 OS=Arabidopsis thaliana OX=3702 GN=ATJ2 PE=1 SV=2	AT5G22060
26.5622	26.4221	NaN	22.7967	25.2062	20.5879	27.2655	22.2048	22.2935	22.5616	25.6077	26.6683					+	AP1_WT_ELUATE_AP1_WT_INPUT	19	19	19	42.4	42.4	42.4	76.187	0	84.406	1956400000	38	79	51483000	3.39144	0.00288233	3.89672	5.44931	P43254	P43254	E3 ubiquitin-protein ligase COP1	COP1	1431	sp|P43254|COP1_ARATH E3 ubiquitin-protein ligase COP1 OS=Arabidopsis thaliana OX=3702 GN=COP1 PE=1 SV=2	AT2G32950
27.3165	27.7643	NaN	30.2921	30.1411	30.1296	26.9495	29.8789	29.8417	29.6045	28.2559	27.9068					+	AP1_WT_ELUATE_AP1_WT_INPUT	9	9	6	51.2	51.2	32.4	30.474	0	119.52	57407000000	7	226	8201100000	5.42447	0.000102432	-2.34273	-9.93967	P43286	P43286	Aquaporin PIP2-1;Aquaporin PIP2-1, N-terminally processed	PIP2-1	1435	sp|P43286|PIP21_ARATH Aquaporin PIP2-1 OS=Arabidopsis thaliana OX=3702 GN=PIP2-1 PE=1 SV=1	AT3G53420
NaN	26.3371	NaN	26.7874	26.6381	26.4886	NaN	26.0401	26.7651	26.2802	26.7869	NaN							7	7	7	24.5	24.5	24.5	50.966	0	23.367	7506500000	19	44	395080000	0.0930877	1	0.0621157	0.255226	P43297	P43297	Cysteine proteinase RD21a	RD21A	1438	sp|P43297|RD21A_ARATH Cysteine proteinase RD21A OS=Arabidopsis thaliana OX=3702 GN=RD21A PE=1 SV=1	AT1G47128
NaN	NaN	NaN	23.7402	20.4808	21.8608	NaN	22.6798	22.5457	21.7136	24.1149	23.9941							9	9	9	13.7	13.7	13.7	80.332	0	15.856	1232800000	44	30	28018000	1.21509	0.179905	1.88436	2.3019	P43299	P43299	DNA replication licensing factor MCM7	MCM7	1440	sp|P43299|MCM7_ARATH DNA replication licensing factor MCM7 OS=Arabidopsis thaliana OX=3702 GN=MCM7 PE=1 SV=2	AT4G02060
24.4717	24.7473	26.1755	29.1794	28.5693	28.7797	26.9326	29.2563	28.7744	29.1385	25.7388	26.143					+	AP1_WT_ELUATE_AP1_WT_INPUT	18	18	18	77.5	77.5	77.5	28.041	0	323.31	57874000000	15	360	3858300000	5.00749	0.000200017	-3.24809	-8.16627	P43333	P43333	U2 small nuclear ribonucleoprotein A		1441	sp|P43333|RU2A_ARATH U2 small nuclear ribonucleoprotein A OS=Arabidopsis thaliana OX=3702 GN=At1g09760 PE=2 SV=2	AT1G09760
24.4166	24.2035	24.9371	28.8889	28.7089	28.8382	25.3397	28.9489	28.9876	28.5151	26.3834	25.5961					+	AP1_WT_ELUATE_AP1_WT_INPUT	5	5	5	20.5	20.5	20.5	28.167	0	65.828	33190000000	6	131	5531700000	6.14891	3.78029e-05	-3.66852	-10.913	P45434	P45434	Translocon-associated protein subunit alpha		1443	sp|P45434|SSRA_ARATH Translocon-associated protein subunit alpha OS=Arabidopsis thaliana OX=3702 GN=At2g21160 PE=2 SV=3	AT2G21160
27.7352	27.3432	27.4753	25.925	25.0306	25.7479	28.0981	24.592	24.7145	24.5968	26.6803	27.02					+	AP1_WT_ELUATE_AP1_WT_INPUT	4	2	2	17.1	6.4	6.4	38.022	0	318.39	3810300000	21	63	181440000	4.53453	0.000415019	2.29088	7.20161	P46010	P46010	Nitrilase 3	NIT3	1445	sp|P46010|NRL3_ARATH Nitrilase 3 OS=Arabidopsis thaliana OX=3702 GN=NIT3 PE=1 SV=1	AT3G44320
NaN	NaN	NaN	27.4445	28.1354	27.7362	NaN	26.835	27.2317	26.6767	26.3009	26.4796							20	11	11	69.7	41.9	41.9	30.194	0	154.41	12056000000	18	105	669760000	1.22374	0.176857	-0.95295	-2.31644	P46077	P46077	14-3-3-like protein GF14 phi	GRF4	1448	sp|P46077|14334_ARATH 14-3-3-like protein GF14 phi OS=Arabidopsis thaliana OX=3702 GN=GRF4 PE=1 SV=2	AT1G35160
NaN	NaN	NaN	24.4523	25.3585	25.6319	NaN	25.5186	25.6387	25.1753	25.096	24.555							11	10	10	31.6	29.6	29.6	49.831	0	19.826	2796600000	32	39	87395000	0.624535	0.5779	-0.470398	-1.31228	P46248	P46248	Aspartate aminotransferase, chloroplastic	ASP5	1449	sp|P46248|AAT5_ARATH Aspartate aminotransferase, chloroplastic OS=Arabidopsis thaliana OX=3702 GN=ASP5 PE=1 SV=2	AT4G31990
32.9671	33.0303	33.2756	32.1771	31.9339	31.9005	32.7376	32.0032	31.3212	32.2129	33.8475	32.8561					+	AP1_WT_ELUATE_AP1_WT_INPUT	22	22	3	67.4	67.4	17.4	27.859	0	323.31	557710000000	14	915	39836000000	3.70051	0.00164134	1.19425	5.69639	P46286	P46286	60S ribosomal protein L8-1	RPL8A	1451	sp|P46286|RL81_ARATH 60S ribosomal protein L8-1 OS=Arabidopsis thaliana OX=3702 GN=RPL8A PE=1 SV=2	AT2G18020
NaN	NaN	NaN	25.4296	24.4827	25.1397	NaN	25.0118	25.6051	25.3955	24.9324	24.5859							7	6	6	20	18.2	18.2	51.174	0	10.949	2933000000	18	27	162940000	0.64556	0.554324	-0.4182	-1.34849	P46310;P48622	P46310	Omega-3 fatty acid desaturase, chloroplastic	FAD7	1453	sp|P46310|FAD3C_ARATH sn-2 acyl-lipid omega-3 desaturase (ferredoxin), chloroplastic OS=Arabidopsis thaliana OX=3702 GN=FAD7 PE=1 SV=1	AT3G11170
26.0445	25.5254	NaN	27.6913	27.1877	27.442	26.0474	27.6635	27.3871	27.3066	26.619	26.0801					+	AP1_WT_ELUATE_AP1_WT_INPUT	11	11	11	31.3	31.3	31.3	44.047	0	101.81	11986000000	16	98	749130000	4.51371	0.000426725	-1.3831	-7.67948	P46313	P46313	Omega-6 fatty acid desaturase, endoplasmic reticulum	FAD2	1455	sp|P46313|FAD6E_ARATH Delta(12)-fatty-acid desaturase OS=Arabidopsis thaliana OX=3702 GN=FAD2 PE=1 SV=1	AT3G12120
NaN	NaN	NaN	25.6209	26.8593	26.7489	24.9555	25.9989	26.6063	26.3442	25.6618	25.0096					+	AP1_WT_ELUATE_AP1_WT_INPUT	16	16	16	49.3	49.3	49.3	47.757	0	44.595	4409000000	28	64	157470000	2.05257	0.0354306	-1.15414	-3.58976	P46643	P46643	Aspartate aminotransferase, mitochondrial	ASP1	1460	sp|P46643|AAT1_ARATH Aspartate aminotransferase, mitochondrial OS=Arabidopsis thaliana OX=3702 GN=ASP1 PE=1 SV=1	AT2G30970
26.0046	NaN	NaN	27.3974	28.3638	27.5251	NaN	27.7222	27.7897	27.0954	NaN	25.1494					+	AP1_WT_ELUATE_AP1_WT_INPUT	19	19	14	47.9	47.9	38.5	48.954	0	104.75	11287000000	24	91	470300000	2.8111	0.00828157	-2.0719	-5.47898	P46644;P46646	P46644	Aspartate aminotransferase 3, chloroplastic	ASP3	1461	sp|P46644|AAT3_ARATH Aspartate aminotransferase 3, chloroplastic OS=Arabidopsis thaliana OX=3702 GN=ASP3 PE=1 SV=1	AT5G11520
28.6751	28.8095	29.2394	28.7692	28.7325	28.5996	28.8639	28.8487	28.6569	28.5099	29.8973	28.8239							8	8	8	46.2	46.2	46.2	11.996	0	141.94	33175000000	7	135	4739300000	1.06035	0.242886	0.365399	1.89718	P46690	P46690	Gibberellin-regulated protein 4	GASA4	1463	sp|P46690|GASA4_ARATH Gibberellin-regulated protein 4 OS=Arabidopsis thaliana OX=3702 GN=GASA4 PE=1 SV=2	AT5G15230
25.9442	26.197	25.5086	28.0564	28.4938	28.6198	26.0561	28.6977	28.3936	28.5023	26.8868	26.6134					+	AP1_WT_ELUATE_AP1_WT_INPUT	11	11	11	48.4	48.4	48.4	24.765	0	157.72	23872000000	15	112	1591400000	5.89563	5.22624e-05	-2.25956	-10.2459	Q9ZTW3;P47192;Q9MAS5;O48850;F4J7T4;Q8VY69	Q9ZTW3;P47192	Vesicle-associated membrane protein 721;Vesicle-associated membrane protein 722	VAMP721;VAMP722	1466	sp|Q9ZTW3|VA721_ARATH Vesicle-associated membrane protein 721 OS=Arabidopsis thaliana OX=3702 GN=VAMP721 PE=2 SV=1;sp|P47192|VA722_ARATH Vesicle-associated membrane protein 722 OS=Arabidopsis thaliana OX=3702 GN=VAMP722 PE=2 SV=2	AT1G04750;AT2G33120
NaN	24.5624	NaN	25.6142	25.4823	24.7813	NaN	24.8561	25.0761	25.814	24.4359	26.159							13	13	12	58.1	58.1	54.7	33.805	0	51.376	4327000000	16	74	270440000	0.195403	1	-0.2182	-0.492149	P47998;Q9LJA0;Q9SXS7	P47998	Cysteine synthase 1	OASA1	1469	sp|P47998|CYSK1_ARATH Cysteine synthase 1 OS=Arabidopsis thaliana OX=3702 GN=OASA1 PE=1 SV=2	AT4G14880
26.8797	27.5015	27.7096	24.9682	24.4354	24.9993	28.9096	25.0045	24.9207	25.5725	27.5649	28.6222				TALE	+	AP1_WT_ELUATE_AP1_WT_INPUT	13	13	4	39.2	39.2	20	47.599	0	126.12	7864000000	17	109	462590000	5.11321	0.000171812	2.88112	8.39451	P48000;Q9FPQ8;P46640	P48000	Homeobox protein knotted-1-like 3	KNAT3	1471	sp|P48000|KNAT3_ARATH Homeobox protein knotted-1-like 3 OS=Arabidopsis thaliana OX=3702 GN=KNAT3 PE=1 SV=1	AT5G25220
NaN	NaN	NaN	21.9225	22.2952	22.115	25.8015	22.0305	21.945	21.7531	25.514	25.549				TALE	+	AP1_WT_ELUATE_AP1_WT_INPUT	13	4	4	37.9	16.8	16.8	44.385	0	27.827	2104700000	15	19	140310000	7.80699	5.02912e-06	3.61129	28.8158	P48001	P48001	Homeobox protein knotted-1-like 4	KNAT4	1472	sp|P48001|KNAT4_ARATH Homeobox protein knotted-1-like 4 OS=Arabidopsis thaliana OX=3702 GN=KNAT4 PE=1 SV=3	AT5G11060
26.0391	26.0472	NaN	28.3607	29.2998	28.2388	26.9889	28.149	27.8368	27.223	27.7347	27.3892					+	AP1_WT_ELUATE_AP1_WT_INPUT	15	15	10	71.4	71.4	58.4	25.132	0	323.31	29052000000	11	173	2641100000	1.87248	0.0498015	-1.34488	-3.06729	P48006	P48006	Elongation factor 1-delta 1		1474	sp|P48006|EF1D1_ARATH Elongation factor 1-delta 1 OS=Arabidopsis thaliana OX=3702 GN=At1g30230 PE=1 SV=2	AT1G30230
29.5285	31.875	29.9509	23.51	22.1371	21.9012	31.5019	22.5903	23.8353	21.6932	28.8124	31.2235				MIKC_MADS	+	AP1_WT_ELUATE_AP1_WT_INPUT	20	20	20	75	75	75	24.047	0	323.31	13767000000	14	162	983380000	6.79099	1.54161e-05	7.87085	12.7752	P48007	P48007	Floral homeotic protein PISTILLATA	PI	1475	sp|P48007|PIST_ARATH Floral homeotic protein PISTILLATA OS=Arabidopsis thaliana OX=3702 GN=PI PE=1 SV=1	AT5G20240
NaN	NaN	NaN	28.7584	29.3797	29.307	25.4352	28.6349	28.814	28.2236	28.1291	27.3791							17	16	13	61.8	61.8	58.3	28.915	0	323.31	36286000000	17	226	2134400000	1.81923	0.0553666	-1.87181	-3.1954	P48347;F4I1B7;F4IA59	P48347	14-3-3-like protein GF14 epsilon	GRF10	1476	sp|P48347|14310_ARATH 14-3-3-like protein GF14 epsilon OS=Arabidopsis thaliana OX=3702 GN=GRF10 PE=1 SV=1	AT1G22300
26.7471	25.4467	25.6974	28.3379	28.1598	28.2727	25.6892	26.9365	27.7394	27.2498	28.0413	27.8516							17	15	8	74.6	71.4	41.9	27.975	0	323.31	19962000000	16	245	1247600000	1.34265	0.140034	-1.20379	-2.28458	P48349	P48349	14-3-3-like protein GF14 lambda	GRF6	1478	sp|P48349|14336_ARATH 14-3-3-like protein GF14 lambda OS=Arabidopsis thaliana OX=3702 GN=GRF6 PE=1 SV=1	AT5G10450
27.2781	26.5025	NaN	26.4771	27.1265	26.7608	26.1878	26.1111	27.3062	26.7027	28.3156	28.1486							13	13	12	63.8	63.8	60.6	27.169	0	127.53	10147000000	14	141	724760000	0.615197	0.589092	0.539125	1.25078	P48491	P48491	Triosephosphate isomerase, cytosolic	CTIMC	1483	sp|P48491|TPIS_ARATH Triosephosphate isomerase, cytosolic OS=Arabidopsis thaliana OX=3702 GN=CTIMC PE=1 SV=2	AT3G55440
NaN	NaN	NaN	24.0843	24.0941	23.9593	NaN	23.7589	23.9943	24.2801	24.1223	23.1781							5	5	5	22.8	22.8	22.8	34.271	0	31.319	1373200000	17	25	80777000	0.717536	0.482182	-0.378303	-1.47126	P48512;Q9SS44	P48512	Transcription initiation factor IIB-1	TFIIB1	1484	sp|P48512|TF2B1_ARATH Transcription initiation factor IIB-1 OS=Arabidopsis thaliana OX=3702 GN=TFIIB1 PE=1 SV=1	AT2G41630
25.5481	25.3311	NaN	26.6748	27.3459	27.1662	25.5974	26.4522	26.7572	26.4042	26.6202	26.5439							17	17	4	76.7	76.7	20.1	35.767	0	158.62	9320000000	16	131	582500000	1.76554	0.0614225	-0.871973	-2.91547	P48578;P48528	P48578	Serine/threonine-protein phosphatase PP2A-3 catalytic subunit	PP2A3	1487	sp|P48578|PP2A4_ARATH Serine/threonine-protein phosphatase PP2A-4 catalytic subunit OS=Arabidopsis thaliana OX=3702 GN=PP2A4 PE=1 SV=1	AT3G58500
25.255	25.0891	NaN	25.1664	24.5896	24.7907	NaN	25.7513	25.5902	25.2712	24.9989	24.7688							7	7	6	21.5	21.5	19.4	44.076	0	35.248	3002300000	12	43	250190000	0.28888	1	-0.165255	-0.682516	P48623	P48623	Omega-3 fatty acid desaturase, endoplasmic reticulum	FAD3	1488	sp|P48623|FAD3E_ARATH Acyl-lipid omega-3 desaturase (cytochrome b5), endoplasmic reticulum OS=Arabidopsis thaliana OX=3702 GN=FAD3 PE=1 SV=1	AT2G29980
NaN	NaN	NaN	26.0988	27.0887	26.5163	NaN	26.5809	26.3161	26.2688	25.3519	25.5305					+	AP1_WT_ELUATE_AP1_WT_INPUT	9	9	9	31.7	31.7	31.7	53.87	0	40.959	6651700000	21	85	316750000	2.13182	0.0304583	-1.03706	-3.96821	P48641	P48641	Glutathione reductase, cytosolic		1489	sp|P48641|GSHRC_ARATH Glutathione reductase, cytosolic OS=Arabidopsis thaliana OX=3702 GN=At3g24170 PE=1 SV=1	AT3G24170
NaN	NaN	NaN	26.0112	26.6966	26.1217	NaN	26.1855	26.6996	26.0396	26.5602	25.7035							21	21	19	31.8	31.8	29.1	92.996	0	71.614	6405900000	45	90	142350000	0.203435	1	-0.160527	-0.513455	P49040;Q9LXL5	P49040	Sucrose synthase 1	SUS1	1491	sp|P49040|SUS1_ARATH Sucrose synthase 1 OS=Arabidopsis thaliana OX=3702 GN=SUS1 PE=1 SV=3	AT5G20830
27.956	27.2578	26.1448	26.4837	25.4377	21.539	27.1716	25.9571	26.4827	25.6936	27.7936	27.9774							8	8	8	34.5	34.5	34.5	18.429	0	40.538	7456600000	9	80	828510000	1.57296	0.0888682	2.1179	2.59472	P49107	P49107	Photosystem I reaction center subunit N, chloroplastic	PSAN	1494	sp|P49107|PSAN_ARATH Photosystem I reaction center subunit N, chloroplastic OS=Arabidopsis thaliana OX=3702 GN=PSAN PE=1 SV=2	AT5G64040
NaN	NaN	NaN	24.7747	24.5652	24.8318	NaN	24.5608	24.5407	24.7003	24.0762	24.1019					+	AP1_WT_ELUATE_AP1_WT_INPUT	5	5	5	15.6	15.6	15.6	41.005	0	14.687	2026600000	16	39	126660000	3.07982	0.00504076	-0.573219	-6.17068	P49177	P49177	Guanine nucleotide-binding protein subunit beta	GB1	1495	sp|P49177|GBB_ARATH Guanine nucleotide-binding protein subunit beta OS=Arabidopsis thaliana OX=3702 GN=GB1 PE=1 SV=1	AT4G34460
29.2421	29.0707	28.7177	29.4012	29.0131	28.7477	29.2201	29.7705	30.4915	29.4215	29.5159	29.3478							9	9	2	48.4	48.4	18.5	13.878	0	116.18	81849000000	6	214	13642000000	0.500038	0.745507	-0.288516	-1.05511	P49200	P49200	40S ribosomal protein S20-1	RPS20A	1496	sp|P49200|RS201_ARATH 40S ribosomal protein S20-1 OS=Arabidopsis thaliana OX=3702 GN=RPS20C PE=2 SV=2	AT3G45030
29.4112	29.8395	29.8895	26.8403	26.5692	26.1966	29.2785	27.146	26.3803	27.145	29.7522	29.3834					+	AP1_WT_ELUATE_AP1_WT_INPUT	7	7	7	42.3	42.3	42.3	15.735	0	127.48	36277000000	6	256	6046100000	7.3956	7.60058e-06	2.87948	14.783	P49201;Q9SF35	P49201;Q9SF35	40S ribosomal protein S23-2;40S ribosomal protein S23-1	RPS23B;RPS23A	1497	sp|P49201|RS232_ARATH 40S ribosomal protein S23-2 OS=Arabidopsis thaliana OX=3702 GN=RPS23B PE=2 SV=2;sp|Q9SF35|RS231_ARATH 40S ribosomal protein S23-1 OS=Arabidopsis thaliana OX=3702 GN=RPS23A PE=2 SV=2	AT3G09680;AT5G02960
32.5326	32.872	32.8624	31.4961	31.4791	31.3235	32.9043	31.8481	31.7344	31.6249	33.4539	32.8225					+	AP1_WT_ELUATE_AP1_WT_INPUT	29	29	3	71.3	71.3	10	29.802	0	323.31	443700000000	15	1143	29580000000	5.43995	0.000101479	1.32357	9.13156	Q93VH9;P49204	Q93VH9;P49204	40S ribosomal protein S4-1;40S ribosomal protein S4-2	RPS4A;RPS4B	1498	sp|Q93VH9|RS41_ARATH 40S ribosomal protein S4-1 OS=Arabidopsis thaliana OX=3702 GN=RPS4A PE=2 SV=1;sp|P49204|RS42_ARATH 40S ribosomal protein S4-2 OS=Arabidopsis thaliana OX=3702 GN=RPS4B PE=2 SV=4	AT2G17360;AT5G07090
29.3645	29.0238	27.7547	27.3739	26.9715	27.1784	28.8271	27.7589	28.6458	27.6789	28.6779	29.0505					+	AP1_WT_ELUATE_AP1_WT_INPUT	7	7	7	31.4	31.4	31.4	16.036	0	23.862	31359000000	4	150	7839700000	2.29306	0.022261	1.18185	3.57037	Q9SQZ1;Q9SJ36;Q9LZ17;P49205	Q9SQZ1;Q9SJ36;Q9LZ17;P49205	40S ribosomal protein S17-3;40S ribosomal protein S17-2;40S ribosomal protein S17-4;40S ribosomal protein S17-1	RPS17C;RPS17B;RPS17D;RPS17A	1499	sp|Q9SQZ1|RS173_ARATH 40S ribosomal protein S17-3 OS=Arabidopsis thaliana OX=3702 GN=RPS17C PE=2 SV=3;sp|Q9SJ36|RS172_ARATH 40S ribosomal protein S17-2 OS=Arabidopsis thaliana OX=3702 GN=RPS17B PE=2 SV=3;sp|Q9LZ17|RS174_ARATH 40S ribosomal protein S17-4 OS	AT2G04390;AT2G05220;AT3G10610;AT5G04800
33.2941	32.6293	32.7819	31.9832	31.8098	31.6382	32.5667	31.4525	31.3565	31.5372	32.4747	32.6492					+	AP1_WT_ELUATE_AP1_WT_INPUT	18	18	13	69.6	69.6	55.7	22.017	0	323.31	394860000000	10	1013	39486000000	4.54099	0.000413095	1.10306	7.21419	P49209	P49209	60S ribosomal protein L9-1	RPL9B	1500	sp|P49209|RL91_ARATH 60S ribosomal protein L9-1 OS=Arabidopsis thaliana OX=3702 GN=RPL9C PE=1 SV=3	AT1G33120
30.193	30.2633	29.6992	28.6707	28.3903	27.8728	29.5639	28.6684	28.8684	28.6814	30.3719	29.8914					+	AP1_WT_ELUATE_AP1_WT_INPUT	13	13	4	63.2	63.2	31.6	15.503	0	135.67	62398000000	6	259	10400000000	4.67	0.000344928	1.47178	7.46887	P49211	P49211	60S ribosomal protein L32-1	RPL32A	1501	sp|P49211|RL321_ARATH 60S ribosomal protein L32-1 OS=Arabidopsis thaliana OX=3702 GN=RPL32A PE=2 SV=2	AT4G18100
31.186	31.4782	31.5632	31.2497	30.9163	30.8359	31.9552	31.5881	31.47	31.7494	32.1825	31.9524							21	21	4	67.4	67.4	4.7	34.437	0	323.31	330900000000	10	1227	33090000000	1.1024	0.223446	0.418013	1.95572	P49227	P49227	60S ribosomal protein L5-2	RPL5B	1502	sp|P49227|RL52_ARATH 60S ribosomal protein L5-2 OS=Arabidopsis thaliana OX=3702 GN=RPL5B PE=2 SV=3	AT5G39740
32.6527	33.0934	33.1312	31.4842	31.3598	31.1248	32.6874	31.369	31.4775	31.1871	33.0148	32.5776					+	AP1_WT_ELUATE_AP1_WT_INPUT	20	20	8	62.8	62.8	28.1	30.878	0	323.31	340780000000	16	891	21299000000	6.85453	1.48001e-05	1.52577	12.9739	P49688	P49688	40S ribosomal protein S2-3	RPS2C	1507	sp|P49688|RS23_ARATH 40S ribosomal protein S2-3 OS=Arabidopsis thaliana OX=3702 GN=RPS2C PE=1 SV=2	AT2G41840
26.3963	26.0563	NaN	25.2887	23.0537	22.2277	NaN	24.8288	23.0283	24.9158	NaN	25.4274							3	3	3	19.4	19.4	19.4	6.887	0	9.6395	3608100000	3	35	1202700000	1.47833	0.106859	2.06948	2.64378	P49689	P49689	40S ribosomal protein S30	RPS30A	1508	sp|P49689|RS30_ARATH 40S ribosomal protein S30 OS=Arabidopsis thaliana OX=3702 GN=RPS30C PE=3 SV=3	AT2G19750
31.0407	31.1515	31.3507	30.4863	29.9158	29.9307	30.4849	30.0406	30.0525	30.2175	30.7793	30.6874					+	AP1_WT_ELUATE_AP1_WT_INPUT	13	13	13	73.6	73.6	73.6	15.027	0	271.94	149280000000	9	750	16587000000	3.34677	0.00311817	0.808512	5.12102	P49690	P49690	60S ribosomal protein L23	RPL23A	1509	sp|P49690|RL23_ARATH 60S ribosomal protein L23 OS=Arabidopsis thaliana OX=3702 GN=RPL23C PE=2 SV=3	AT1G04480
32.2391	32.5127	32.3558	31.9788	31.7904	31.8033	31.9013	32.1547	31.9455	32.1052	33.293	32.0271							30	30	11	57.7	57.7	20.1	44.721	0	323.31	499700000000	19	1107	26300000000	1.14407	0.206202	0.425154	2.01339	P49691	P49691	60S ribosomal protein L4-2	RPL4D	1510	sp|P49691|RL4B_ARATH 60S ribosomal protein L4-2 OS=Arabidopsis thaliana OX=3702 GN=RPL4D PE=1 SV=2	AT5G02870
32.639	32.5115	32.5239	31.9565	31.8704	31.9102	33.1312	31.6096	31.2051	31.4523	33.8683	32.8094					+	AP1_WT_ELUATE_AP1_WT_INPUT	21	21	4	61.1	61.1	16	29.129	0	323.31	458480000000	11	861	41680000000	3.3214	0.0032679	1.24653	5.081	P49692	P49692	60S ribosomal protein L7a-1	RPL7AA	1511	sp|P49692|RL7A1_ARATH 60S ribosomal protein L7a-1 OS=Arabidopsis thaliana OX=3702 GN=RPL7AA PE=2 SV=2	AT2G47610
26.3144	26.4414	NaN	26.3982	26.2076	25.985	25.7145	26.1142	25.914	26.1763	26.821	25.6937							11	5	4	33.7	23.6	19.2	24.201	0	88.542	9673600000	6	97	1612300000	0.114959	1	0.0644435	0.304821	P49693	P49693	60S ribosomal protein L19-3	RPL19C	1512	sp|P49693|RL193_ARATH 60S ribosomal protein L19-3 OS=Arabidopsis thaliana OX=3702 GN=RPL19C PE=2 SV=3	AT4G02230
27.8546	27.8093	25.7996	28.4394	28.3234	28.2888	27.881	28.1312	28.1307	28.1252	27.6885	27.5417							14	14	14	34.7	34.7	34.7	54.781	0	46.124	12655000000	33	103	383480000	1.44706	0.113878	-0.810677	-2.42552	P49967;P49966;P37106	P49967	Signal recognition particle 54 kDa protein 3	SRP-54C	1513	sp|P49967|SR543_ARATH Signal recognition particle 54 kDa protein 3 OS=Arabidopsis thaliana OX=3702 GN=SRP-54C PE=2 SV=2	AT1G48900
29.388	28.983	29.1392	29.5066	28.6347	28.7042	29.4252	28.939	28.9293	29	29.2263	29.0215							50	50	50	61.8	61.8	61.8	121.06	0	323.31	58897000000	52	754	1132600000	0.902922	0.332616	0.244899	1.67412	P50546	P50546	DNA-directed RNA polymerase subunit beta	rpoB	1515	sp|P50546|RPOB_ARATH DNA-directed RNA polymerase subunit beta OS=Arabidopsis thaliana OX=3702 GN=rpoB PE=3 SV=4	ATCG00190
26.1874	NaN	26.4938	26.2999	22.1278	25.689	NaN	22.6961	25.1821	24.9384	26.3373	25.9339							6	6	5	44.9	44.9	37.9	25.906	0	323.31	4739400000	8	89	592420000	1.10925	0.220543	1.74923	2.02249	P50699	P50699	Thaumatin-like protein		1516	sp|P50699|TLPH_ARATH Thaumatin-like protein OS=Arabidopsis thaliana OX=3702 GN=At1g18250 PE=2 SV=2	AT1G18250
28.4383	27.2493	NaN	29.5941	28.9437	28.6533	27.9603	28.1253	27.6329	27.8602	29.5433	28.3585							12	12	9	97.4	97.4	72.2	11.452	0	323.31	39254000000	5	308	7850800000	0.127436	1	-0.158319	-0.334454	P51407	P51407	60S acidic ribosomal protein P2-1	RPP2A	1518	sp|P51407|RLA21_ARATH 60S acidic ribosomal protein P2-1 OS=Arabidopsis thaliana OX=3702 GN=RPP2A PE=3 SV=2	AT2G27720
30.6442	30.3026	30.6821	28.7699	27.7137	27.8424	30.4171	28.7125	28.7283	28.9085	29.7158	30.0341					+	AP1_WT_ELUATE_AP1_WT_INPUT	11	11	11	58.6	58.6	58.6	24.038	0	323.31	49485000000	13	267	3806600000	4.4677	0.000459155	1.85342	7.07229	P51412	P51412	50S ribosomal protein L21, chloroplastic	RPL21	1519	sp|P51412|RK21_ARATH 50S ribosomal protein L21, chloroplastic OS=Arabidopsis thaliana OX=3702 GN=RPL21 PE=2 SV=1	AT1G35680
30.0955	30.2001	30.4531	29.0081	28.8506	28.7566	29.8951	29.3816	29.4828	29.4705	30.7982	29.8256					+	AP1_WT_ELUATE_AP1_WT_INPUT	13	13	2	53.1	53.1	6.9	19.854	0	259.39	92344000000	10	463	9234400000	3.44189	0.00266798	1.05289	5.27252	P51413	P51413	60S ribosomal protein L17-2	RPL17B	1520	sp|P51413|RL172_ARATH 60S ribosomal protein L17-2 OS=Arabidopsis thaliana OX=3702 GN=RPL17B PE=2 SV=2	AT1G67430
31.6774	31.6537	31.1406	31.1759	31.1475	31.0822	31.6125	31.2954	31.0099	31.2661	32.4632	31.5699							13	13	11	50	50	44.5	16.944	0	323.31	264660000000	6	454	44110000000	1.79716	0.0578502	0.523369	2.89562	P51414	P51414	60S ribosomal protein L26-1	RPL26A	1521	sp|P51414|RL261_ARATH 60S ribosomal protein L26-1 OS=Arabidopsis thaliana OX=3702 GN=RPL26A PE=2 SV=2	AT3G49910
32.8988	32.9783	33.0946	31.4122	31.544	31.369	32.8837	30.8009	30.7935	30.5673	33.5836	32.6952					+	AP1_WT_ELUATE_AP1_WT_INPUT	21	21	9	69.1	69.1	28.7	21.307	0	323.31	335710000000	8	871	41963000000	5.52878	9.12218e-05	1.94123	9.3406	P51418	P51418	60S ribosomal protein L18a-2	RPL18AB	1522	sp|P51418|R18A2_ARATH 60S ribosomal protein L18a-2 OS=Arabidopsis thaliana OX=3702 GN=RPL18AB PE=1 SV=2	AT2G34480
30.1895	29.7843	30.4418	30.1109	29.4357	29.3569	30.3285	27.5797	27.7556	28.5074	30.8746	30.3554					+	AP1_WT_ELUATE_AP1_WT_INPUT	9	6	6	43.7	29.6	29.6	15.607	0	179.97	83334000000	6	220	13889000000	2.25714	0.0239306	1.53799	3.52073	P51419	P51419	60S ribosomal protein L27-3	RPL27C	1523	sp|P51419|RL273_ARATH 60S ribosomal protein L27-3 OS=Arabidopsis thaliana OX=3702 GN=RPL27C PE=2 SV=2	AT4G15000
26.7782	28.6022	26.9805	20.4043	23.4244	22.3133	25.8548	24.9609	25.1493	24.4173	28.6588	26.8464					+	AP1_WT_ELUATE_AP1_WT_INPUT	3	3	3	35.3	35.3	35.3	6.4156	0	8.9582	9699600000	1	45	9699600000	2.8737	0.00738719	3.84191	4.39882	P51424	P51424	60S ribosomal protein L39-1	RPL39A	1526	sp|P51424|RL391_ARATH 60S ribosomal protein L39-1 OS=Arabidopsis thaliana OX=3702 GN=RPL39C PE=3 SV=2	AT2G25210
28.4503	28.0709	27.8146	28.2089	27.6574	27.5974	28.2222	29.1447	28.7362	28.6687	28.2577	28.3408							17	3	3	73.4	22.2	22.2	22.921	0	323.31	30997000000	11	176	2817900000	0.215174	1	-0.142809	-0.527585	P51427	P51427	40S ribosomal protein S5-2	RPS5B	1527	sp|P51427|RS52_ARATH 40S ribosomal protein S5-2 OS=Arabidopsis thaliana OX=3702 GN=RPS5B PE=1 SV=2	AT3G11940
31.3667	31.578	31.2725	31.1816	30.9683	30.7486	31.4	31.0845	30.7204	30.7775	32.1682	31.3371					+	AP1_WT_ELUATE_AP1_WT_INPUT	20	20	10	54.2	54.2	26.5	28.162	0	323.31	242280000000	10	726	24228000000	2.49756	0.0150632	0.606934	3.85616	P51430	P51430	40S ribosomal protein S6-2	RPS6B	1528	sp|P51430|RS62_ARATH 40S ribosomal protein S6-2 OS=Arabidopsis thaliana OX=3702 GN=RPS6B PE=1 SV=3	AT5G10360
NaN	NaN	27.573	26.5197	27.4197	27.5118	24.6948	26.7604	26.4137	26.3962	24.972	24.8366							61	4	2	68.1	5.2	3.9	80.051	0	9.6802	9512200000	34	63	279770000	1.22395	0.176857	-1.31781	-2.19225	P51818	P51818	Heat shock protein 90-3	HSP90-3	1530	sp|P51818|HS903_ARATH Heat shock protein 90-3 OS=Arabidopsis thaliana OX=3702 GN=HSP90-3 PE=1 SV=2	AT5G56010
28.9641	29.0363	28.567	28.6197	28.3944	28.6449	28.8209	28.5208	29.1592	28.3268	29.5456	28.9689							22	22	22	60.7	60.7	60.7	50.413	0	323.31	31102000000	18	360	1727900000	1.19812	0.185635	0.372839	2.08774	P52410	P52410	3-oxoacyl-[acyl-carrier-protein] synthase I, chloroplastic	KAS1	1531	sp|P52410|KASC1_ARATH 3-oxoacyl-[acyl-carrier-protein] synthase I, chloroplastic OS=Arabidopsis thaliana OX=3702 GN=KAS1 PE=1 SV=2	AT5G46290
30.4336	31.1308	30.8543	31.5209	31.8461	31.5423	30.3917	31.2773	31.2161	31.3936	31.0453	30.9167					+	AP1_WT_ELUATE_AP1_WT_INPUT	27	27	8	80.4	80.4	24.1	41.735	0	323.31	270700000000	21	1028	12890000000	2.779	0.00879323	-0.670664	-4.25986	P53492	P53492	Actin-7	ACT7	1534	sp|P53492|ACT7_ARATH Actin-7 OS=Arabidopsis thaliana OX=3702 GN=ACT7 PE=1 SV=1	AT5G09810
27.6279	27.3289	26.7543	30.126	30.8702	30.2709	25.4798	30.8639	30.5441	30.583	29.2601	28.9825					+	AP1_WT_ELUATE_AP1_WT_INPUT	58	58	12	81.5	81.5	21.5	89.392	0	323.31	113860000000	43	849	2648000000	3.29773	0.00342263	-2.97075	-5.0438	P54609	P54609	Cell division control protein 48 homolog A	CDC48A	1541	sp|P54609|CD48A_ARATH Cell division control protein 48 homolog A OS=Arabidopsis thaliana OX=3702 GN=CDC48A PE=1 SV=1	AT3G09840
25.0308	NaN	NaN	24.5886	24.8112	24.7547	NaN	24.5339	25.4941	24.8609	25.4487	23.9908							13	13	13	43.8	43.8	43.8	51.094	0	34.408	2156600000	23	44	93766000	0.0166483	1	-0.0171296	-0.0488657	P54873	P54873	Hydroxymethylglutaryl-CoA synthase	HMGS	1542	sp|P54873|HMCS_ARATH Hydroxymethylglutaryl-CoA synthase OS=Arabidopsis thaliana OX=3702 GN=HMGS PE=1 SV=2	AT4G11820
28.102	28.2142	27.4662	28.2226	28.7184	28.5194	28.4132	28.6446	29.195	28.8491	29.3337	29.0368							35	35	23	65.4	65.4	49.8	77.701	0	323.31	28735000000	41	369	700840000	0.389382	0.928431	-0.263828	-0.863759	P54887	P54887	Delta-1-pyrroline-5-carboxylate synthase A;Glutamate 5-kinase;Gamma-glutamyl phosphate reductase	P5CSA	1543	sp|P54887|P5CS1_ARATH Delta-1-pyrroline-5-carboxylate synthase A OS=Arabidopsis thaliana OX=3702 GN=P5CSA PE=1 SV=1	AT2G39800
NaN	NaN	NaN	24.6545	24.23	24.3811	24.5871	24.0098	22.3486	24.2485	25.3305	25.1464							20	8	8	35.3	19.8	19.8	78.87	0	21.716	1915200000	39	46	49108000	1.08318	0.231993	1.04258	2.02459	P54888	P54888	Delta-1-pyrroline-5-carboxylate synthase B;Glutamate 5-kinase;Gamma-glutamyl phosphate reductase	P5CSB	1544	sp|P54888|P5CS2_ARATH Delta-1-pyrroline-5-carboxylate synthase B OS=Arabidopsis thaliana OX=3702 GN=P5CSB PE=2 SV=1	AT3G55610
NaN	NaN	NaN	21.3894	22.0811	22.1599	24.1211	21.8167	23.2892	23.336	24.6568	23.9973					+	AP1_WT_ELUATE_AP1_WT_INPUT	8	8	8	34.4	34.4	34.4	41.681	0	18.268	667670000	20	23	33383000	2.2141	0.0258201	1.91299	3.87299	P54967	P54967	Biotin synthase	BIO2	1546	sp|P54967|BIOB_ARATH Biotin synthase, mitochondrial OS=Arabidopsis thaliana OX=3702 GN=BIO2 PE=1 SV=1	AT2G43360
NaN	NaN	NaN	25.5298	25.8797	22.5142	26.2341	26.3309	26.3148	25.9442	26.1111	26.1777							6	6	6	20.7	20.7	20.7	40.757	0	101.87	6257500000	14	67	446960000	0.383341	0.938379	0.755385	0.868947	P55034	P55034	26S proteasome non-ATPase regulatory subunit 4 homolog	RPN10	1547	sp|P55034|PSMD4_ARATH 26S proteasome non-ATPase regulatory subunit 4 homolog OS=Arabidopsis thaliana OX=3702 GN=RPN10 PE=1 SV=1	AT4G38630
30.6039	30.6529	30.4931	32.2568	32.7566	32.589	30.7568	32.4799	32.1767	32.1864	31.605	31.4731					+	AP1_WT_ELUATE_AP1_WT_INPUT	61	61	4	68.1	68.1	5.2	80.063	0	323.31	460150000000	34	1846	13534000000	4.29288	0.00061195	-1.47677	-6.74162	P55737	P55737	Heat shock protein 90-2	HSP90-2	1551	sp|P55737|HS902_ARATH Heat shock protein 90-2 OS=Arabidopsis thaliana OX=3702 GN=HSP90-2 PE=1 SV=1	AT5G56030
NaN	NaN	NaN	21.8823	20.9926	22.667	25.9653	22.0286	24.4603	22.647	NaN	24.7383							5	5	2	55	55	35	10.976	0	11.763	1608700000	5	19	321740000	1.72063	0.0669136	2.90548	3.18203	P55852	P55852	Small ubiquitin-related modifier 1	SUMO1	1553	sp|P55852|SUMO1_ARATH Small ubiquitin-related modifier 1 OS=Arabidopsis thaliana OX=3702 GN=SUMO1 PE=1 SV=2	AT4G26840
27.952	27.9432	28.8499	31.3754	30.9926	31.0206	28.885	30.9869	31.5426	30.7227	29.4508	28.5818					+	AP1_WT_ELUATE_AP1_WT_INPUT	23	22	22	50.1	48.7	48.7	55.328	0	323.31	157650000000	20	591	7882500000	5.51049	9.27738e-05	-2.49636	-9.29724	P56757	P56757	ATP synthase subunit alpha, chloroplastic	atpA	1557	sp|P56757|ATPA_ARATH ATP synthase subunit alpha, chloroplastic OS=Arabidopsis thaliana OX=3702 GN=atpA PE=1 SV=1	ATCG00120
24.8065	25.4107	24.4746	29.6377	28.6185	29.2251	24.3925	29.0034	29.6265	29.2142	27.4635	26.1313					+	AP1_WT_ELUATE_AP1_WT_INPUT	14	14	14	61.4	61.4	61.4	21.057	0	323.31	37997000000	8	163	4749600000	4.64801	0.000351925	-3.77436	-7.42503	P56759	P56759	ATP synthase subunit b, chloroplastic	atpF	1559	sp|P56759|ATPF_ARATH ATP synthase subunit b, chloroplastic OS=Arabidopsis thaliana OX=3702 GN=atpF PE=3 SV=1	ATCG00130
28.7375	27.5176	26.4351	31.7962	30.7617	31.3962	28.4298	31.6906	32.2996	31.3075	29.5662	28.8021					+	AP1_WT_ELUATE_AP1_WT_INPUT	10	10	10	29.2	29.2	29.2	39.547	0	323.31	204060000000	10	523	20406000000	4.21361	0.000690941	-3.2939	-6.5952	P56761	P56761	Photosystem II D2 protein	psbD	1561	sp|P56761|PSBD_ARATH Photosystem II D2 protein OS=Arabidopsis thaliana OX=3702 GN=psbD PE=1 SV=3	ATCG00270
28.9843	28.1657	29.054	28.3373	28.1028	28.1655	28.7221	28.3163	28.1319	28.2316	28.2687	28.3576							14	14	14	64.1	64.1	64.1	38.137	0	107.78	34482000000	13	232	2652400000	1.39411	0.126527	0.377845	2.35414	P56762	P56762	DNA-directed RNA polymerase subunit alpha	rpoA	1562	sp|P56762|RPOA_ARATH DNA-directed RNA polymerase subunit alpha OS=Arabidopsis thaliana OX=3702 GN=rpoA PE=3 SV=1	ATCG00740
27.2938	26.8719	27.1867	29.1114	27.9435	28.203	26.9078	28.3728	28.413	28.3261	27.1035	27.0611					+	AP1_WT_ELUATE_AP1_WT_INPUT	32	32	32	55.9	55.9	55.9	78.582	0	176	30630000000	37	257	827850000	4.77854	0.000289641	-1.32418	-7.68816	P56763	P56763	DNA-directed RNA polymerase subunit beta	rpoC1	1563	sp|P56763|RPOC1_ARATH DNA-directed RNA polymerase subunit beta OS=Arabidopsis thaliana OX=3702 GN=rpoC1 PE=3 SV=1	ATCG00180
28.8256	28.1857	28.5822	29.8412	28.9209	29.0022	28.6636	28.9721	29.1686	28.9343	28.2283	28.4522					+	AP1_WT_ELUATE_AP1_WT_INPUT	61	61	61	51.8	51.8	51.8	156.36	0	323.31	58654000000	77	593	761730000	2.3622	0.0194511	-0.650273	-3.66637	P56764	P56764	DNA-directed RNA polymerase subunit beta	rpoC2	1564	sp|P56764|RPOC2_ARATH DNA-directed RNA polymerase subunit beta OS=Arabidopsis thaliana OX=3702 GN=rpoC2 PE=3 SV=1	ATCG00170
28.9663	29.0928	28.9046	28.8525	28.5536	28.6078	29.1367	29.0224	28.9462	28.8809	29.1818	29.2254							35	35	35	74	74	74	55.635	0	323.31	43801000000	25	553	1752100000	1.85179	0.0518649	0.274041	2.9691	P56765	P56765	Acetyl-coenzyme A carboxylase carboxyl transferase subunit beta, chloroplastic	accD	1565	sp|P56765|ACCD_ARATH Acetyl-coenzyme A carboxylase carboxyl transferase subunit beta, chloroplastic OS=Arabidopsis thaliana OX=3702 GN=accD PE=1 SV=2	ATCG00500
25.7164	24.6717	22.9343	30.4271	29.548	29.8023	24.8374	29.799	30.7909	29.5052	27.6681	27.1479					+	AP1_WT_ELUATE_AP1_WT_INPUT	18	18	18	28.5	28.5	28.5	83.23	0	118.83	73451000000	18	204	4080600000	3.90432	0.00116634	-4.48279	-6.0437	P56766	P56766	Photosystem I P700 chlorophyll a apoprotein A1	psaA	1566	sp|P56766|PSAA_ARATH Photosystem I P700 chlorophyll a apoprotein A1 OS=Arabidopsis thaliana OX=3702 GN=psaA PE=2 SV=1	ATCG00350
25.7543	24.3032	NaN	30.2726	29.1521	29.067	25.1714	29.2921	30.3203	29.4191	27.2528	27.308					+	AP1_WT_ELUATE_AP1_WT_INPUT	15	15	15	28.3	28.3	28.3	82.474	0	221.13	53053000000	17	237	3120700000	3.78567	0.00142169	-3.62928	-6.17452	P56767	P56767	Photosystem I P700 chlorophyll a apoprotein A2	psaB	1567	sp|P56767|PSAB_ARATH Photosystem I P700 chlorophyll a apoprotein A2 OS=Arabidopsis thaliana OX=3702 GN=psaB PE=3 SV=1	ATCG00340
NaN	NaN	NaN	30.2284	29.4052	29.7132	26.8663	30.0826	30.8246	29.4909	25.6406	24.5232					+	AP1_WT_ELUATE_AP1_WT_INPUT	18	18	18	59.1	59.1	59.1	35.356	0	311.58	66847000000	18	329	3713700000	3.98551	0.00100097	-4.28077	-7.84337	P56771	P56771	Cytochrome f	petA	1569	sp|P56771|CYF_ARATH Cytochrome f OS=Arabidopsis thaliana OX=3702 GN=petA PE=3 SV=1	ATCG00540
23.3318	NaN	NaN	28.7193	27.8003	27.8352	NaN	29.1939	29.5464	28.4198	24.632	23.9037					+	AP1_WT_ELUATE_AP1_WT_INPUT	5	5	5	26	26	26	24.152	0	54.576	26658000000	9	88	2962000000	4.50538	0.00043211	-4.62996	-9.44035	P56773	P56773	Cytochrome b6	petB	1571	sp|P56773|CYB6_ARATH Cytochrome b6 OS=Arabidopsis thaliana OX=3702 GN=petB PE=1 SV=1	ATCG00720
29.7377	28.8023	28.5914	32.411	31.1683	31.818	29.685	32.2646	32.6924	31.8351	30.9985	29.8026					+	AP1_WT_ELUATE_AP1_WT_INPUT	19	19	19	38	38	38	56.036	0	323.31	301830000000	14	1051	21559000000	3.80136	0.00137478	-2.42862	-5.86672	P56777	P56777	Photosystem II CP47 reaction center protein	psbB	1573	sp|P56777|PSBB_ARATH Photosystem II CP47 reaction center protein OS=Arabidopsis thaliana OX=3702 GN=psbB PE=1 SV=1	ATCG00680
30.974	29.9091	29.353	32.5497	31.5736	32.0895	30.0366	32.3451	32.9334	31.8185	31.0145	30.2486					+	AP1_WT_ELUATE_AP1_WT_INPUT	18	18	18	36.4	36.4	36.4	51.867	0	323.31	320780000000	14	620	22913000000	3.82843	0.00131009	-1.96235	-5.91294	P56778	P56778	Photosystem II CP43 reaction center protein	psbC	1574	sp|P56778|PSBC_ARATH Photosystem II CP43 reaction center protein OS=Arabidopsis thaliana OX=3702 GN=psbC PE=1 SV=3	ATCG00280
29.8382	29.4724	28.7507	30.505	29.9973	29.9893	29.1518	29.941	29.7744	29.7173	29.301	29.5443					+	AP1_WT_ELUATE_AP1_WT_INPUT	92	92	92	47.4	47.4	47.4	213.73	0	323.31	92745000000	99	936	936820000	2.16608	0.0283717	-0.644307	-3.39552	P56785;P93296;A0A1P8B0A1	P56785	Protein TIC 214	TIC214	1578	sp|P56785|TI214_ARATH Protein TIC 214 OS=Arabidopsis thaliana OX=3702 GN=TIC214 PE=1 SV=1	ATCG01000
26.083	25.6182	NaN	27.9276	27.382	27.463	25.1583	27.402	26.7618	26.8856	27.1302	26.0417					+	AP1_WT_ELUATE_AP1_WT_INPUT	60	60	59	37.1	37.1	36.8	269.56	0	267.42	14055000000	119	285	118110000	2.29944	0.022028	-1.2974	-3.6873	P56786	P56786	Protein Ycf2	ycf2-A	1579	sp|P56786|YCF2_ARATH Protein Ycf2 OS=Arabidopsis thaliana OX=3702 GN=ycf2-B PE=3 SV=1	ATCG00860
30.821	30.7012	30.9651	29.1679	28.5916	28.7085	30.086	28.8591	28.3731	28.9219	30.6003	30.172					+	AP1_WT_ELUATE_AP1_WT_INPUT	12	12	12	53.6	53.6	53.6	29.864	0	323.31	63368000000	14	391	4526300000	5.69154	6.99068e-05	1.78724	9.73373	P56791	P56791	50S ribosomal protein L2, chloroplastic	rpl2-A	1581	sp|P56791|RK2_ARATH 50S ribosomal protein L2, chloroplastic OS=Arabidopsis thaliana OX=3702 GN=rpl2-B PE=3 SV=1	ATCG00830
27.4654	27.4203	26.8187	27.0247	27.1975	27.0787	27.5445	27.4164	27.7879	26.8983	27.9246	27.523							6	6	6	59	59	59	13.582	0	49.035	12047000000	8	150	1505900000	0.524275	0.707828	0.215497	1.09536	P56792	P56792	50S ribosomal protein L14, chloroplastic	rpl14	1582	sp|P56792|RK14_ARATH 50S ribosomal protein L14, chloroplastic OS=Arabidopsis thaliana OX=3702 GN=rpl14 PE=3 SV=1	ATCG00780
29.5947	29.4785	29.1484	28.5539	27.9057	27.8894	29.3179	28.2573	27.6996	28.1211	30.0108	29.286					+	AP1_WT_ELUATE_AP1_WT_INPUT	5	5	5	48.9	48.9	48.9	15.294	0	46.013	38513000000	5	224	7702500000	4.89559	0.000240149	1.40156	7.92988	P56793;Q84WZ8	P56793	50S ribosomal protein L16, chloroplastic	rpl16	1583	sp|P56793|RK16_ARATH 50S ribosomal protein L16, chloroplastic OS=Arabidopsis thaliana OX=3702 GN=rpl16 PE=3 SV=1	ATCG00790
29.6463	29.1613	28.6527	27.4534	26.7593	26.8569	29.8285	27.1501	27.0711	27.2366	29.0402	29.414					+	AP1_WT_ELUATE_AP1_WT_INPUT	9	9	9	51.3	51.3	51.3	14.163	0	130.11	23905000000	5	166	4781000000	6.12171	3.86276e-05	2.2026	10.8396	P56794	P56794	50S ribosomal protein L20, chloroplastic	rpl20	1584	sp|P56794|RK20_ARATH 50S ribosomal protein L20, chloroplastic OS=Arabidopsis thaliana OX=3702 GN=rpl20 PE=3 SV=1	ATCG00660
29.7754	29.618	29.2451	28.3241	27.3793	27.0694	29.8944	28.0587	27.9359	28.2975	30.8124	30.4541					+	AP1_WT_ELUATE_AP1_WT_INPUT	8	8	8	45	45	45	18.586	0	323.31	41387000000	9	230	4598500000	4.31118	0.000593498	2.12242	6.77573	P56795	P56795	50S ribosomal protein L22, chloroplastic	rpl22	1585	sp|P56795|RK22_ARATH 50S ribosomal protein L22, chloroplastic OS=Arabidopsis thaliana OX=3702 GN=rpl22 PE=3 SV=1	ATCG00810
29.2003	29.1439	29.4057	27.8944	27.3105	27.6068	29.0435	27.5074	27.0053	27.2274	29.666	28.9663					+	AP1_WT_ELUATE_AP1_WT_INPUT	15	15	15	72.5	72.5	72.5	26.904	0	116.6	28550000000	12	267	2379200000	6.16255	3.745e-05	1.81232	10.95	P56797	P56797	30S ribosomal protein S2, chloroplastic	rps2	1587	sp|P56797|RR2_ARATH 30S ribosomal protein S2, chloroplastic OS=Arabidopsis thaliana OX=3702 GN=rps2 PE=3 SV=1	ATCG00160
31.4209	30.8239	30.1714	30.1951	29.537	29.4738	30.3404	29.1933	28.8484	29.5958	30.3241	31.0789					+	AP1_WT_ELUATE_AP1_WT_INPUT	22	22	22	78.9	78.9	78.9	25.188	0	312.06	96806000000	15	581	6453800000	2.91848	0.00679779	1.21938	4.46514	P56798	P56798	30S ribosomal protein S3, chloroplastic	rps3	1588	sp|P56798|RR3_ARATH 30S ribosomal protein S3, chloroplastic OS=Arabidopsis thaliana OX=3702 GN=rps3 PE=3 SV=1	ATCG00800
30.2013	29.7187	29.4233	28.3691	28.0089	28.0767	30.0221	28.125	28.0682	27.8232	30.1591	29.7701					+	AP1_WT_ELUATE_AP1_WT_INPUT	14	14	14	69.2	69.2	69.2	23.24	0	233.31	35745000000	8	329	4468100000	6.76875	1.55208e-05	1.80388	12.7063	P56799	P56799	30S ribosomal protein S4, chloroplastic	rps4	1589	sp|P56799|RR4_ARATH 30S ribosomal protein S4, chloroplastic OS=Arabidopsis thaliana OX=3702 GN=rps4 PE=3 SV=1	ATCG00380
29.4021	28.8358	28.7336	27.8116	27.165	27.322	28.9748	27.5622	26.7993	27.4041	28.6673	28.884					+	AP1_WT_ELUATE_AP1_WT_INPUT	9	9	9	62.7	62.7	62.7	15.479	0	148.77	19072000000	7	179	2724600000	5.32892	0.000122089	1.57223	8.87557	P56801	P56801	30S ribosomal protein S8, chloroplastic	rps8	1590	sp|P56801|RR8_ARATH 30S ribosomal protein S8, chloroplastic OS=Arabidopsis thaliana OX=3702 GN=rps8 PE=3 SV=1	ATCG00770
29.6566	29.091	28.9076	27.5079	26.9286	27.1586	29.3397	27.1018	26.3821	27.1383	29.4968	29.0113					+	AP1_WT_ELUATE_AP1_WT_INPUT	8	8	8	55.1	55.1	55.1	15.023	0	60.612	22270000000	6	142	3711600000	6.33721	2.75493e-05	2.21432	11.4327	P56802	P56802	30S ribosomal protein S11, chloroplastic	rps11	1591	sp|P56802|RR11_ARATH 30S ribosomal protein S11, chloroplastic OS=Arabidopsis thaliana OX=3702 GN=rps11 PE=3 SV=1	ATCG00750
NaN	NaN	NaN	25.1972	22.7046	23.5303	25.6632	25.3647	25.3806	25.2243	25.6109	25.3922							4	4	4	35	35	35	11.785	0	8.6257	3228900000	3	26	1076300000	0.706723	0.492858	0.988495	1.42759	P56804	P56804	30S ribosomal protein S14, chloroplastic	rps14	1592	sp|P56804|RR14_ARATH 30S ribosomal protein S14, chloroplastic OS=Arabidopsis thaliana OX=3702 GN=rps14 PE=2 SV=2	ATCG00330
28.4279	28.4328	28.0648	27.4041	26.1352	26.8388	28.1897	27.1747	26.6342	27.2868	28.299	28.271					+	AP1_WT_ELUATE_AP1_WT_INPUT	10	10	10	65.9	65.9	65.9	10.718	0	147.98	15364000000	5	148	3072900000	4.29067	0.00061331	1.36853	6.73752	P56805	P56805	30S ribosomal protein S15, chloroplastic	rps15	1593	sp|P56805|RR15_ARATH 30S ribosomal protein S15, chloroplastic OS=Arabidopsis thaliana OX=3702 GN=rps15 PE=3 SV=1	ATCG01120
26.6678	26.4628	25.581	25.8711	23.8601	25.3639	27.1164	23.1912	22.3234	24.6364	26.7442	26.387					+	AP1_WT_ELUATE_AP1_WT_INPUT	5	5	5	42.6	42.6	42.6	12.06	0	23.075	5270600000	5	51	1054100000	2.52647	0.014254	2.28552	3.89705	P56807	P56807	30S ribosomal protein S18, chloroplastic	rps18	1594	sp|P56807|RR18_ARATH 30S ribosomal protein S18, chloroplastic OS=Arabidopsis thaliana OX=3702 GN=rps18 PE=3 SV=1	ATCG00650
27.422	26.8284	27.3098	25.572	25.5499	26.1863	27.3562	26.103	26.5179	25.8879	27.1269	27.313					+	AP1_WT_ELUATE_AP1_WT_INPUT	5	5	5	60.9	60.9	60.9	10.608	0	37.353	7787300000	4	73	1946800000	4.47337	0.000454921	1.25659	7.08319	P56808	P56808	30S ribosomal protein S19, chloroplastic	rps19	1595	sp|P56808|RR19_ARATH 30S ribosomal protein S19, chloroplastic OS=Arabidopsis thaliana OX=3702 GN=rps19 PE=3 SV=1	ATCG00820
NaN	NaN	NaN	25.4059	25.9823	25.4732	24.0203	26.0343	25.6968	26.3644	25.0674	24.7733					+	AP1_WT_ELUATE_AP1_WT_INPUT	17	17	9	49.6	49.6	30.8	66.724	0	192.58	6631000000	21	147	315760000	2.29673	0.0221428	-1.20579	-4.02154	P56820	P56820	Eukaryotic translation initiation factor 3 subunit D	TIF3D1	1596	sp|P56820|EIF3D_ARATH Eukaryotic translation initiation factor 3 subunit D OS=Arabidopsis thaliana OX=3702 GN=TIF3D1 PE=1 SV=1	AT4G20980
NaN	NaN	NaN	22.4681	20.6128	21.8969	NaN	21.999	22.7388	21.8042	26.1057	23.661					+	AP1_WT_ELUATE_AP1_WT_INPUT	18	5	5	81.1	23.2	23.2	34.39	0	84.112	1398900000	9	26	155440000	2.01037	0.0381815	2.96339	3.72763	P57691;O04204	P57691	60S acidic ribosomal protein P0-3	RPP0C	1598	sp|P57691|RLA03_ARATH 60S acidic ribosomal protein P0-3 OS=Arabidopsis thaliana OX=3702 GN=RPP0C PE=1 SV=1	AT3G11250
NaN	NaN	NaN	26.425	26.6642	27.1609	NaN	27.3313	27.5916	26.6911	25.2575	25.8925					+	AP1_WT_ELUATE_AP1_WT_INPUT	8	8	7	43.8	43.8	38	21.642	0	51.414	10844000000	10	81	1084400000	2.04959	0.0356158	-1.40235	-3.80448	P58684	P58684	Probable signal peptidase complex subunit 2		1603	sp|P58684|SPCS2_ARATH Probable signal peptidase complex subunit 2 OS=Arabidopsis thaliana OX=3702 GN=At2g39960 PE=2 SV=1	AT2G39960
33.6793	33.3802	32.649	34.675	34.1586	34.3352	33.9493	34.0551	34.0353	34.1251	35.3316	34.5585							14	14	3	60.3	60.3	28.7	15.268	0	195.16	1922200000000	4	425	480540000000	0.341629	1	-0.306053	-0.77659	P59226;Q9FKQ3	P59226;Q9FKQ3	Histone H3.2;Histone H3-like 5	HTR2	1608	sp|P59226|H32_ARATH Histone H3.2 OS=Arabidopsis thaliana OX=3702 GN=HTR1 PE=1 SV=2;sp|Q9FKQ3|H3L5_ARATH Histone H3-like 5 OS=Arabidopsis thaliana OX=3702 GN=At5g65350 PE=2 SV=3	AT1G09200;AT5G65350
32.0341	31.7545	31.588	31.1633	31.0936	31.2629	31.6772	30.6633	30.6036	30.7721	31.19	31.3735					+	AP1_WT_ELUATE_AP1_WT_INPUT	18	18	10	69.9	69.9	40.7	24.425	0	323.31	275180000000	11	705	25017000000	2.64163	0.0114923	0.676423	4.06116	P59230	P59230	60S ribosomal protein L10a-2	RPL10AB	1609	sp|P59230|R10A2_ARATH 60S ribosomal protein L10a-2 OS=Arabidopsis thaliana OX=3702 GN=RPL10AB PE=1 SV=1	AT2G27530
27.7787	27.815	26.7316	26.968	26.6988	26.9045	27.8755	26.606	26.3975	26.6221	27.368	28.0888					+	AP1_WT_ELUATE_AP1_WT_INPUT	15	7	7	63.1	30.4	30.4	24.532	0	16.994	12831000000	11	78	1166400000	2.72584	0.00972972	0.910135	4.18257	P59231	P59231	60S ribosomal protein L10a-3	RPL10AC	1610	sp|P59231|R10A3_ARATH 60S ribosomal protein L10a-3 OS=Arabidopsis thaliana OX=3702 GN=RPL10AC PE=1 SV=1	AT5G22440
31.637	31.5322	31.6198	30.7454	30.4243	30.7987	31.1146	30.2486	30.8216	30.5398	31.0176	31.1716					+	AP1_WT_ELUATE_AP1_WT_INPUT	12	12	5	58.6	58.6	24.8	17.812	0	323.31	198160000000	7	828	28308000000	3.3316	0.00320254	0.752371	5.09707	P59232;P59233;P59271	P59232;P59233;P59271	Ubiquitin-40S ribosomal protein S27a-2;Ubiquitin;40S ribosomal protein S27a-2;Ubiquitin-40S ribosomal protein S27a-3;Ubiquitin;40S ribosomal protein S27a-3;Ubiquitin-40S ribosomal protein S27a-1;Ubiquitin;40S ribosomal protein S27a-1	RPS27AB;RPS27AC;RPS27AA	1611	sp|P59232|R27AB_ARATH Ubiquitin-40S ribosomal protein S27a-2 OS=Arabidopsis thaliana OX=3702 GN=RPS27AB PE=2 SV=2;sp|P59233|R27AC_ARATH Ubiquitin-40S ribosomal protein S27a-3 OS=Arabidopsis thaliana OX=3702 GN=RPS27AC PE=2 SV=2;sp|P59271|R27AA_ARATH Ubiqui	AT1G23410;AT2G47110;AT3G62250
34.7465	34.5851	35.2602	35.882	35.2126	35.3601	34.9931	35.2038	34.5876	35.43	36.0169	35.0222							20	20	20	70.9	70.9	70.9	11.409	0	323.31	4009100000000	6	3523	668180000000	0.277591	1	-0.175341	-0.654223	P59259	P59259	Histone H4		1612	sp|P59259|H4_ARATH Histone H4 OS=Arabidopsis thaliana OX=3702 GN=At5g59970 PE=1 SV=2	AT1G07660
30.6607	30.9985	30.7991	30.4083	29.9958	30.107	30.7666	30.0846	30.1159	30.1287	31.6501	31.1653					+	AP1_WT_ELUATE_AP1_WT_INPUT	23	10	5	69.4	40.5	17.4	27.939	0	298.72	125130000000	14	402	8937600000	3.55446	0.0021736	0.866657	5.45481	P60039	P60039	60S ribosomal protein L7-3	RPL7C	1616	sp|P60039|RL73_ARATH 60S ribosomal protein L7-3 OS=Arabidopsis thaliana OX=3702 GN=RPL7C PE=2 SV=1	AT2G44120
32.3053	32.396	32.2987	31.7219	31.4852	31.6429	32.4039	31.5479	31.8291	31.5482	33.2864	32.504					+	AP1_WT_ELUATE_AP1_WT_INPUT	27	27	14	69.8	69.8	40.9	28.171	0	323.31	375320000000	14	775	26808000000	3.6149	0.00193067	0.903142	5.55408	P60040	P60040	60S ribosomal protein L7-2	RPL7B	1617	sp|P60040|RL72_ARATH 60S ribosomal protein L7-2 OS=Arabidopsis thaliana OX=3702 GN=RPL7B PE=1 SV=1	AT2G01250
29.0609	28.5511	28.5322	28.0798	27.4947	28.1893	28.6737	27.9792	28.3581	27.7222	28.6757	28.5978					+	AP1_WT_ELUATE_AP1_WT_INPUT	9	9	9	47.1	47.1	47.1	17.357	0	174.69	29147000000	8	170	3643400000	3.07211	0.0051016	0.711345	4.69574	P61841	P61841	30S ribosomal protein S7, chloroplastic	rps7-A	1623	sp|P61841|RR7_ARATH 30S ribosomal protein S7, chloroplastic OS=Arabidopsis thaliana OX=3702 GN=rps7-B PE=1 SV=1	ATCG00900
27.6714	26.6046	25.2078	24.3833	22.6111	22.7349	26.9985	22.9546	22.3641	22.2678	27.459	26.9614					+	AP1_WT_ELUATE_AP1_WT_INPUT	7	7	7	54.8	54.8	54.8	10.789	0	25.643	2732300000	6	47	455390000	5.04129	0.000187775	3.93114	8.23871	P61845	P61845	50S ribosomal protein L23, chloroplastic	rpl23-A	1625	sp|P61845|RK23_ARATH 50S ribosomal protein L23, chloroplastic OS=Arabidopsis thaliana OX=3702 GN=rpl23-B PE=3 SV=1	ATCG00840
26.3563	25.4106	25.1377	23.8829	24.5226	24.9736	25.504	26.0454	26.8765	25.4945	27.1346	26.6559							5	5	5	64.2	64.2	64.2	9.0384	0	58.737	3969800000	6	78	661630000	0.679275	0.51911	0.733918	1.34197	P62090	P62090	Photosystem I iron-sulfur center	psaC	1626	sp|P62090|PSAC_ARATH Photosystem I iron-sulfur center OS=Arabidopsis thaliana OX=3702 GN=psaC PE=3 SV=2	ATCG01060
27.7697	27.4036	27.8836	26.8869	26.8323	21.2998	26.6672	26.1677	25.9236	22.3485	27.9579	27.1539							5	5	5	43.1	43.1	43.1	13.764	0	12.138	9371200000	3	49	3123700000	1.51652	0.0990035	2.56284	2.51894	P62126	P62126	30S ribosomal protein S12, chloroplastic	rps12-A	1629	sp|P62126|RR12_ARATH 30S ribosomal protein S12, chloroplastic OS=Arabidopsis thaliana OX=3702 GN=rps12-B PE=2 SV=2	ATCG00065
NaN	NaN	NaN	26.1613	26.0148	27.2289	24.6492	27.0363	27.2686	26.511	24.6394	NaN					+	AP1_WT_ELUATE_AP1_WT_INPUT	12	12	12	64.3	64.3	64.3	23.17	0	103.17	8546600000	13	88	657430000	2.62103	0.0119714	-2.05914	-5.02459	P82873	P82873	Mitochondrial import receptor subunit TOM20-2	TOM20-2	1633	sp|P82873|TO202_ARATH Mitochondrial import receptor subunit TOM20-2 OS=Arabidopsis thaliana OX=3702 GN=TOM20-2 PE=1 SV=2	AT1G27390
27.754	26.1944	26.2844	31.4563	31.7469	31.0911	28.3356	31.3988	31.57	31.1395	29.832	29.0911					+	AP1_WT_ELUATE_AP1_WT_INPUT	34	33	33	71.2	69.2	69.2	59.67	0	323.31	203050000000	30	891	6768200000	3.70559	0.0016317	-3.48513	-5.70491	P83483;P83484;Q9C5A9	P83483;P83484;Q9C5A9	ATP synthase subunit beta-1, mitochondrial;ATP synthase subunit beta-2, mitochondrial;ATP synthase subunit beta-3, mitochondrial		1635	sp|P83483|ATPBM_ARATH ATP synthase subunit beta-1, mitochondrial OS=Arabidopsis thaliana OX=3702 GN=At5g08670 PE=1 SV=1;sp|P83484|ATPBN_ARATH ATP synthase subunit beta-2, mitochondrial OS=Arabidopsis thaliana OX=3702 GN=At5g08690 PE=1 SV=1;sp|Q9C5A9|ATPBO_	AT5G08670;AT5G08680;AT5G08690
29.045	27.9786	27.5588	31.7261	30.6967	31.31	29.2477	31.686	32.3667	31.2045	30.1901	29.2878					+	AP1_WT_ELUATE_AP1_WT_INPUT	9	9	9	26.3	26.3	26.3	38.936	0	323.31	205740000000	10	444	20574000000	3.72959	0.00156713	-2.61364	-5.74521	P83755	P83755	Photosystem II protein D1	psbA	1636	sp|P83755|PSBA_ARATH Photosystem II protein D1 OS=Arabidopsis thaliana OX=3702 GN=psbA PE=1 SV=2	ATCG00020
26.1393	24.5028	NaN	28.433	27.7677	27.8254	23.9684	28.3083	28.1662	27.646	25.9745	25.506					+	AP1_WT_ELUATE_AP1_WT_INPUT	21	8	8	34.5	15.9	15.9	67.529	0	323.31	16721000000	29	150	576590000	4.13709	0.000773988	-2.80623	-6.87181	P92935	P92935	ADP,ATP carrier protein 2, chloroplastic	AATP2	1637	sp|P92935|TLC2_ARATH ADP,ATP carrier protein 2, chloroplastic OS=Arabidopsis thaliana OX=3702 GN=AATP2 PE=1 SV=2	AT1G15500
27.9249	27.9331	26.8151	29.691	29.5507	29.6861	26.8787	29.6866	29.7836	29.3953	28.1319	28.3048					+	AP1_WT_ELUATE_AP1_WT_INPUT	43	43	12	47.5	47.5	14.8	116.36	0	323.31	63511000000	46	509	1380700000	4.56507	0.000400408	-1.96749	-7.26126	P92939	P92939	Calcium-transporting ATPase 1, endoplasmic reticulum-type	ECA1	1638	sp|P92939|ECA1_ARATH Calcium-transporting ATPase 1, endoplasmic reticulum-type OS=Arabidopsis thaliana OX=3702 GN=ECA1 PE=1 SV=2	AT1G07810
29.3245	28.9495	29.4102	29.8306	29.4355	29.5353	29.5819	29.7322	29.4556	29.8839	28.7708	29.2351				MYB			62	62	62	70.1	70.1	70.1	95.766	0	323.31	106260000000	48	768	2213700000	1.84445	0.0525182	-0.433511	-2.95922	P92948	P92948	Cell division cycle 5-like protein	CDC5	1641	sp|P92948|CDC5L_ARATH Cell division cycle 5-like protein OS=Arabidopsis thaliana OX=3702 GN=CDC5 PE=1 SV=2	AT1G09770
27.3182	25.876	NaN	24.7154	23.1288	20.5921	NaN	26.3839	27.4643	26.0054	27.4061	25.5856							7	7	7	44.4	44.4	44.4	21.976	0	50.056	8422700000	10	68	842270000	0.683176	0.515689	1.83148	1.37165	P92959	P92959	50S ribosomal protein L24, chloroplastic	RPL24	1642	sp|P92959|RK24_ARATH 50S ribosomal protein L24, chloroplastic OS=Arabidopsis thaliana OX=3702 GN=RPL24 PE=2 SV=2	AT5G54600
25.791	NaN	NaN	28.009	27.8227	28.0541	24.5455	28.5471	29.277	28.4354	27.5789	25.8899					+	AP1_WT_ELUATE_AP1_WT_INPUT	11	11	3	27.8	27.8	10.1	41.281	0	187.95	30474000000	18	173	1693000000	2.57625	0.0130537	-2.40624	-4.28952	P92966	P92966	Serine/arginine-rich splicing factor RS41	RS41	1647	sp|P92966|SRS41_ARATH Serine/arginine-rich splicing factor RS41 OS=Arabidopsis thaliana OX=3702 GN=RS41 PE=1 SV=2	AT5G52040
28.4109	27.7701	24.7225	28.9524	28.7915	28.8314	27.9738	29.1229	29.1807	28.8431	28.9299	28.4946							32	32	31	69.1	69.1	69.1	57.792	0	264.23	39496000000	27	374	1462800000	1.11846	0.216358	-1.23665	-1.97798	P92994;Q9LEX2;O64636	P92994	Trans-cinnamate 4-monooxygenase	CYP73A5	1649	sp|P92994|TCMO_ARATH Trans-cinnamate 4-monooxygenase OS=Arabidopsis thaliana OX=3702 GN=CYP73A5 PE=1 SV=1	AT2G30490
29.2914	29.2588	28.354	31.6909	31.9648	31.9899	28.2123	29.2963	29.5684	30.9898	30.0245	30.2245							15	15	14	62.1	62.1	57.9	29.742	0	323.31	192580000000	8	404	24073000000	1.74452	0.06376	-1.68915	-2.82491	P93004	P93004	Aquaporin PIP2-7;Aquaporin PIP2-7, N-terminally processed	PIP2-7	1651	sp|P93004|PIP27_ARATH Aquaporin PIP2-7 OS=Arabidopsis thaliana OX=3702 GN=PIP2-7 PE=1 SV=2	AT4G35100
24.8557	25.2637	23.8305	25.6537	25.8135	26.4066	NaN	26.233	26.8957	26.6938	24.4559	26.1672					+	AP1_WT_ELUATE_AP1_WT_INPUT	29	29	29	54.6	54.6	54.6	85.276	0	301.62	12108000000	38	152	318640000	2.02417	0.037201	-1.36815	-3.28465	P93008;Q9FZ92	P93008	DEAD-box ATP-dependent RNA helicase 21	RH21	1652	sp|P93008|RH21_ARATH DEAD-box ATP-dependent RNA helicase 21 OS=Arabidopsis thaliana OX=3702 GN=RH21 PE=2 SV=1	AT2G33730
28.7253	28.3394	27.8295	28.206	27.4854	27.6342	28.4247	28.346	28.0511	28.2732	28.8326	28.5071							15	15	15	38.6	38.6	38.6	32.645	0	48.688	29837000000	17	203	1755100000	1.25434	0.167545	0.443823	2.1646	P93014	P93014	30S ribosomal protein S5, chloroplastic	rps5	1653	sp|P93014|RR5_ARATH 30S ribosomal protein S5, chloroplastic OS=Arabidopsis thaliana OX=3702 GN=rps5 PE=2 SV=1	AT2G33800
26.2899	NaN	NaN	27.5692	28.0115	28.1204	NaN	27.5856	27.6481	27.5662	27.7188	27.1522							36	36	32	49.6	49.6	44.2	120.25	0	216.75	15976000000	59	248	270780000	1.22593	0.176292	-0.696548	-2.24725	P93028	P93028	Ubiquitin-activating enzyme E1 1	UBA1	1657	sp|P93028|UBE11_ARATH Ubiquitin-activating enzyme E1 1 OS=Arabidopsis thaliana OX=3702 GN=UBA1 PE=1 SV=1	AT2G30110
24.9188	NaN	NaN	26.2434	26.5777	26.605	NaN	26.6714	26.6167	26.6698	25.9984	25.8644					+	AP1_WT_ELUATE_AP1_WT_INPUT	27	27	21	46.6	46.6	40.3	89.091	0	169.85	8867500000	43	102	206220000	2.28581	0.0226121	-0.970111	-4.00175	P93042	P93042	Protein ROOT HAIR DEFECTIVE 3	RHD3	1660	sp|P93042|RHD3_ARATH Protein ROOT HAIR DEFECTIVE 3 OS=Arabidopsis thaliana OX=3702 GN=RHD3 PE=1 SV=1	AT3G13870
NaN	NaN	NaN	21.6501	20.9088	23.9603	24.4838	22.6468	24.1207	24.0948	24.5467	24.7273							8	8	8	11.7	11.7	11.7	110.28	0	14.126	1239100000	44	17	28162000	1.08845	0.229346	1.68902	2.03282	P93043	P93043	Vacuolar protein sorting-associated protein 41 homolog	VPS41	1661	sp|P93043|VPS41_ARATH Vacuolar protein sorting-associated protein 41 homolog OS=Arabidopsis thaliana OX=3702 GN=VPS41 PE=1 SV=3	AT1G08190
24.9105	25.9745	25.9307	24.9109	24.6404	24.3713	27.0838	25.4121	24.7962	25.7529	26.1778	25.6958							14	14	14	71.2	71.2	71.2	27.289	0	275.21	5029100000	13	168	386860000	1.69697	0.0699559	0.981528	2.76109	P93045	P93045	Chromatin structure-remodeling complex protein BSH	BSH	1662	sp|P93045|BSH_ARATH Chromatin structure-remodeling complex protein BSH OS=Arabidopsis thaliana OX=3702 GN=BSH PE=1 SV=2	AT3G17590
26.6568	27.1419	NaN	28.2312	28.22	28.0973	26.759	28.0931	27.7454	27.5964	26.6231	27.1107					+	AP1_WT_ELUATE_AP1_WT_INPUT	7	7	7	36.7	36.7	36.7	18.211	0	35.935	20502000000	8	92	2562800000	4.34039	0.00056306	-1.13894	-7.29955	P93303	P93303	ATP synthase protein YMF19	YMF19	1665	sp|P93303|YMF19_ARATH ATP synthase protein YMF19 OS=Arabidopsis thaliana OX=3702 GN=YMF19 PE=1 SV=1	AT2G07707
NaN	NaN	NaN	25.2582	25.4026	25.9516	NaN	25.5688	25.6713	26.0625	25.819	26.4586							22	22	22	25.9	25.9	25.9	125.92	0	98.968	4664000000	56	75	83286000	0.889583	0.341258	0.486313	1.7597	P93736	P93736	Valine--tRNA ligase	VALRS	1669	sp|P93736|SYVM1_ARATH Valine--tRNA ligase, mitochondrial 1 OS=Arabidopsis thaliana OX=3702 GN=TWN2 PE=1 SV=2	AT1G14610
27.6024	27.622	27.4322	27.2129	27.8826	27.6531	26.7393	27.4122	28.2542	28.0738	28.7385	28.3657							17	17	8	61.7	61.7	34	35.571	0	188.95	18157000000	18	195	1008700000	0.00191387	1	0.00187556	0.00565033	P93819;Q9FJU0	P93819	Malate dehydrogenase, cytoplasmic 1	MDH1	1670	sp|P93819|MDHC1_ARATH Malate dehydrogenase 1, cytoplasmic OS=Arabidopsis thaliana OX=3702 GN=MDH1 PE=1 SV=2	AT1G04410
NaN	NaN	NaN	25.5145	25.2077	25.414	NaN	25.5859	25.3677	25.0958	24.3758	24.8973					+	AP1_WT_ELUATE_AP1_WT_INPUT	11	6	6	30.3	20.5	20.5	54.489	0	41.059	3263400000	23	57	141890000	2.11853	0.0311769	-0.727669	-3.94151	P93834	P93834	Hexokinase-2	HXK2	1673	sp|P93834|HXK2_ARATH Hexokinase-2 OS=Arabidopsis thaliana OX=3702 GN=HXK2 PE=1 SV=1	AT2G19860
29.6539	29.6757	30.6337	31.327	31.2367	31.252	30.5397	30.7506	30.5896	30.3305	30.8643	30.293							6	6	6	12.5	12.5	12.5	21.559	0	117.24	148750000000	4	220	37188000000	1.41379	0.121924	-0.637706	-2.3807	P94040	P94040	Germin-like protein subfamily 3 member 1	GLP1	1676	sp|P94040|GL31_ARATH Germin-like protein subfamily 3 member 1 OS=Arabidopsis thaliana OX=3702 GN=GLP1 PE=1 SV=1	AT1G72610
26.9181	26.298	27.7744	28.8219	27.4249	28.2712	NaN	27.8039	27.2454	27.6174	27.5412	27.1186							7	7	7	49.3	49.3	49.3	21.836	0	88.859	25110000000	6	94	4185000000	1.17521	0.194065	-0.73407	-2.08426	P94072	P94072	Germin-like protein subfamily 3 member 3	GER3	1677	sp|P94072|GL33_ARATH Germin-like protein subfamily 3 member 3 OS=Arabidopsis thaliana OX=3702 GN=GER3 PE=1 SV=1	AT5G20630
24.564	NaN	NaN	24.9212	24.9211	24.7821	NaN	24.4492	25.1583	24.412	25.8076	24.8878							15	10	10	37.3	27.8	27.8	56.148	0	28.638	2639000000	26	39	101500000	0.47851	0.779011	0.312459	1.04151	Q00218	Q00218	Phospho-2-dehydro-3-deoxyheptonate aldolase 2, chloroplastic	DHS2	1682	sp|Q00218|AROG_ARATH Phospho-2-dehydro-3-deoxyheptonate aldolase 2, chloroplastic OS=Arabidopsis thaliana OX=3702 GN=DHS2 PE=2 SV=2	AT4G33510
27.1364	NaN	30.3613	28.5966	28.5105	28.3775	NaN	28.2768	28.4647	28.4867	28.6589	28.3266							11	11	4	63.2	63.2	21.8	21.986	0	143.41	17996000000	13	151	1384300000	0.120227	1	0.168697	0.318611	Q01474	Q01474	GTP-binding protein SAR1B	SAR1B	1683	sp|Q01474|SAR1B_ARATH GTP-binding protein SAR1B OS=Arabidopsis thaliana OX=3702 GN=SAR1B PE=1 SV=1	AT1G56330
27.0541	27.761	27.8941	29.6849	30.4369	30.1266	28.0378	29.6502	29.9517	29.3927	29.1453	28.6737					+	AP1_WT_ELUATE_AP1_WT_INPUT	22	22	15	73.4	73.4	52.5	29.161	0	323.31	73470000000	15	479	4898000000	3.45959	0.0025705	-1.77949	-5.30096	Q01525	Q01525	14-3-3-like protein GF14 omega	GRF2	1684	sp|Q01525|14332_ARATH 14-3-3-like protein GF14 omega OS=Arabidopsis thaliana OX=3702 GN=GRF2 PE=1 SV=2	AT1G78300
28.83	27.2052	25.4598	30.3757	29.282	28.9465	28.7716	29.4545	29.481	29.2393	28.6361	27.8525							8	8	8	49.4	49.4	49.4	25.996	0	323.31	49643000000	7	255	7091900000	1.82649	0.0545439	-1.67064	-2.93506	Q01667	Q01667	Chlorophyll a-b binding protein 6, chloroplastic	LHCA1	1685	sp|Q01667|CAB6_ARATH Chlorophyll a-b binding protein 6, chloroplastic OS=Arabidopsis thaliana OX=3702 GN=LHCA1 PE=1 SV=1	AT3G54890
29.0483	28.6991	28.4901	29.9262	29.3491	29.4623	28.5604	29.543	29.9644	29.4023	28.7018	28.8715					+	AP1_WT_ELUATE_AP1_WT_INPUT	21	21	21	66.5	66.5	66.5	40.911	0	323.31	59466000000	20	452	2973300000	4.08695	0.000845178	-0.879359	-6.36562	Q01908	Q01908	ATP synthase gamma chain 1, chloroplastic	ATPC1	1686	sp|Q01908|ATPG1_ARATH ATP synthase gamma chain 1, chloroplastic OS=Arabidopsis thaliana OX=3702 GN=ATPC1 PE=1 SV=1	AT4G04640
26.9512	26.5467	25.1546	25.4037	25.152	24.9619	27.0623	25.594	26.0182	25.2103	27.0384	27.2687					+	AP1_WT_ELUATE_AP1_WT_INPUT	9	9	7	54.5	54.5	48.3	16.89	0	106.61	5127200000	12	116	427270000	2.33072	0.0207145	1.28029	3.62258	Q03250	Q03250	Glycine-rich RNA-binding protein 7	RBG7	1690	sp|Q03250|RBG7_ARATH Glycine-rich RNA-binding protein 7 OS=Arabidopsis thaliana OX=3702 GN=RBG7 PE=1 SV=1	AT2G21660
24.8166	NaN	NaN	26.9085	26.2654	26.5033	NaN	26.5514	26.5309	26.414	26.1931	25.8014							8	8	8	30.1	30.1	30.1	35.787	0	118.67	11479000000	11	105	1043500000	1.77151	0.0607905	-0.925265	-3.11663	Q04836	Q04836	31 kDa ribonucleoprotein, chloroplastic	CP31A	1692	sp|Q04836|CP31A_ARATH 31 kDa ribonucleoprotein, chloroplastic OS=Arabidopsis thaliana OX=3702 GN=CP31A PE=1 SV=1	AT4G24770
NaN	NaN	NaN	28.3534	27.5376	27.974	25.6513	26.9416	28.3389	27.7374	26.5488	25.9309					+	AP1_WT_ELUATE_AP1_WT_INPUT	24	24	24	49.1	49.1	49.1	71.645	0	323.31	33165000000	28	222	1184500000	2.73637	0.00954377	-1.77019	-4.86008	Q05153	Q05153	FACT complex subunit SSRP1	SSRP1	1693	sp|Q05153|SSRP1_ARATH FACT complex subunit SSRP1 OS=Arabidopsis thaliana OX=3702 GN=SSRP1 PE=1 SV=2	AT3G28730
27.9164	27.9724	26.6481	28.7966	29.0109	28.6477	27.4097	28.7703	29.1904	29.1779	29.7239	29.4011							15	15	15	84.4	84.4	84.4	27.561	0	323.31	38790000000	14	323	2770700000	0.810792	0.401537	-0.753686	-1.53993	Q05431	Q05431	L-ascorbate peroxidase 1, cytosolic	APX1	1695	sp|Q05431|APX1_ARATH L-ascorbate peroxidase 1, cytosolic OS=Arabidopsis thaliana OX=3702 GN=APX1 PE=1 SV=2	AT1G07890
26.1777	25.0462	26.1722	27.8656	28.2808	28.4916	26.143	27.7734	28.103	27.9182	27.3958	26.9626					+	AP1_WT_ELUATE_AP1_WT_INPUT	17	17	17	46.7	46.7	46.7	63.812	0	224.53	18685000000	27	212	692060000	3.29479	0.00342406	-1.75584	-5.03918	Q05758	Q05758	Ketol-acid reductoisomerase, chloroplastic		1696	sp|Q05758|ILV5_ARATH Ketol-acid reductoisomerase, chloroplastic OS=Arabidopsis thaliana OX=3702 GN=At3g58610 PE=1 SV=2	AT3G58610
27.4504	27.3802	26.7484	30.3941	30.3836	30.1609	25.8338	29.8474	29.8416	29.9731	27.9692	27.6353					+	AP1_WT_ELUATE_AP1_WT_INPUT	14	9	6	57.3	38.8	28.7	30.597	0	323.31	79121000000	8	217	9890200000	5.33621	0.000120807	-2.93056	-8.8922	Q06611	Q06611	Aquaporin PIP1-2	PIP1-2	1701	sp|Q06611|PIP12_ARATH Aquaporin PIP1-2 OS=Arabidopsis thaliana OX=3702 GN=PIP1-2 PE=1 SV=1	AT2G45960
28.5513	27.6758	27.2733	30.2262	29.3898	29.7899	28.9388	30.4801	30.9396	29.8489	29.4464	28.2626					+	AP1_WT_ELUATE_AP1_WT_INPUT	13	9	9	48.3	33.4	33.4	31.139	0	56.235	69625000000	15	139	4641700000	2.88421	0.00724875	-1.7544	-4.41436	Q07473	Q07473	Chlorophyll a-b binding protein CP29.1, chloroplastic	LHCB4.1	1705	sp|Q07473|CB4A_ARATH Chlorophyll a-b binding protein CP29.1, chloroplastic OS=Arabidopsis thaliana OX=3702 GN=LHCB4.1 PE=1 SV=1	AT5G01530
31.6238	31.2783	32.2973	29.3897	29.3349	28.9986	30.3055	28.9575	29.1318	29.4392	30.6275	30.431					+	AP1_WT_ELUATE_AP1_WT_INPUT	10	5	2	73	38.8	8.6	17.129	0	144.57	86870000000	7	313	12410000000	3.71599	0.00159958	1.88528	5.72234	Q08112;Q9FY66	Q08112	40S ribosomal protein S15-1	RPS15A	1707	sp|Q08112|RS151_ARATH 40S ribosomal protein S15-1 OS=Arabidopsis thaliana OX=3702 GN=RPS15A PE=2 SV=1	AT1G04270
27.5134	27.6728	27.6608	27.9397	27.6333	27.8184	27.8627	27.3937	27.5593	27.68	27.6618	27.597							16	16	5	43.9	43.9	13.2	47.232	0	144.42	20417000000	22	155	928050000	0.0356321	1	-0.00928434	-0.10141	Q08466;O64817	Q08466	Casein kinase II subunit alpha-2	CKA2	1709	sp|Q08466|CSK22_ARATH Casein kinase II subunit alpha-2 OS=Arabidopsis thaliana OX=3702 GN=CKA2 PE=1 SV=3	AT3G50000
29.6707	29.6287	29.4221	32.2477	32.0489	31.9502	30.0506	31.9909	31.9004	31.9311	30.4059	30.2591					+	AP1_WT_ELUATE_AP1_WT_INPUT	16	16	11	53.7	53.7	37.6	32.291	0	323.31	324040000000	14	747	23146000000	6.72321	1.68166e-05	-2.10533	-12.5662	Q08682	Q08682	40S ribosomal protein Sa-1	RPSaA	1711	sp|Q08682|RSSA1_ARATH 40S ribosomal protein Sa-1 OS=Arabidopsis thaliana OX=3702 GN=RPSaA PE=1 SV=3	AT1G72370
NaN	24.6919	NaN	29.1802	29.4429	29.3345	NaN	29.2929	28.924	29.395	27.484	26.1341					+	AP1_WT_ELUATE_AP1_WT_INPUT	14	7	7	59.1	26.9	26.9	30.632	0	323.31	45356000000	8	270	5669500000	3.20139	0.00403137	-3.15823	-5.8526	Q08733	Q08733	Aquaporin PIP1-3	PIP1-3	1712	sp|Q08733|PIP13_ARATH Aquaporin PIP1-3 OS=Arabidopsis thaliana OX=3702 GN=PIP1-3 PE=1 SV=1	AT1G01620
NaN	25.6289	NaN	25.5634	25.6422	25.8566	NaN	24.9815	25.6246	25.3564	25.6113	25.0319							9	9	6	29.9	29.9	25.8	44.261	0	26.502	3064700000	21	40	145940000	0.137564	1	-0.0800486	-0.361331	Q09152	Q09152	Farnesyl pyrophosphate synthase 1, mitochondrial	FPS1	1716	sp|Q09152|FPPS1_ARATH Farnesyl pyrophosphate synthase 1, mitochondrial OS=Arabidopsis thaliana OX=3702 GN=FPS1 PE=2 SV=2	AT5G47770
24.8086	26.1075	24.7369	21.7079	21.3423	23.2399	25.3217	24.0988	22.2717	24.1809	24.5909	25.1589					+	AP1_WT_ELUATE_AP1_WT_INPUT	13	10	10	25.3	21.3	21.3	86.271	0	37.462	1276100000	37	51	34490000	2.76689	0.00900781	2.31382	4.2422	Q0WKW1	Q0WKW1		At3g08020	1719	tr|Q0WKW1|Q0WKW1_ARATH PHD finger family protein OS=Arabidopsis thaliana OX=3702 GN=At3g08020 PE=1 SV=1	AT3G08020
NaN	NaN	NaN	26.9715	26.9679	26.9672	NaN	26.7821	26.5497	26.8815	25.2079	25.1726					+	AP1_WT_ELUATE_AP1_WT_INPUT	35	35	35	31.9	31.9	31.9	181.8	0	106.74	9124600000	84	164	108630000	4.96978	0.000213943	-1.66304	-13.3945	Q0WL80	Q0WL80	UDP-glucose:glycoprotein glucosyltransferase	UGGT	1721	sp|Q0WL80|UGGG_ARATH UDP-glucose:glycoprotein glucosyltransferase OS=Arabidopsis thaliana OX=3702 GN=UGGT PE=1 SV=1	AT1G71220
26.0041	23.4613	NaN	29.5882	29.4847	29.5859	25.861	28.863	29.6294	29.5641	28.0991	27.5204					+	AP1_WT_ELUATE_AP1_WT_INPUT	102	25	25	77.4	25.6	25.6	193.27	0	267.07	50963000000	88	341	579120000	2.7716	0.00892193	-3.26337	-4.41146	Q0WLB5;REV__Q9ZRF9	Q0WLB5	Clathrin heavy chain 2	CHC2	1723	sp|Q0WLB5|CLAH2_ARATH Clathrin heavy chain 2 OS=Arabidopsis thaliana OX=3702 GN=CHC2 PE=1 SV=1	AT3G08530
NaN	24.7587	25.591	25.4392	25.4977	26.0074	25.2139	26.1442	25.9109	26.1726	24.2582	25.2699					+	AP1_WT_ELUATE_AP1_WT_INPUT	22	22	17	28.5	28.5	22.5	136.52	0	102.43	7886200000	60	149	131440000	2.04809	0.0356714	-0.843632	-3.31919	Q0WM93	Q0WM93		At4g02480	1727	tr|Q0WM93|Q0WM93_ARATH AAA-type ATPase family protein OS=Arabidopsis thaliana OX=3702 GN=At4g02470 PE=1 SV=1	AT4G02480
29.6154	29.0453	29.2194	32.4921	32.2771	32.3975	29.8508	32.0162	32.3435	32.3325	30.9334	30.6386					+	AP1_WT_ELUATE_AP1_WT_INPUT	104	104	27	77	77	24.8	193.24	0	323.31	381780000000	88	1863	4338500000	4.75874	0.000298204	-2.42601	-7.64781	Q0WNJ6	Q0WNJ6	Clathrin heavy chain 1	CHC1	1735	sp|Q0WNJ6|CLAH1_ARATH Clathrin heavy chain 1 OS=Arabidopsis thaliana OX=3702 GN=CHC1 PE=1 SV=1	AT3G11130
25.9478	25.3239	NaN	25.4588	24.9017	24.9737	26.1688	25.4072	24.6868	25.0529	25.5121	25.7548					+	AP1_WT_ELUATE_AP1_WT_INPUT	13	11	10	36.9	32.5	30.9	48.039	0	46.859	4316800000	27	57	159880000	2.13895	0.0300217	0.661312	3.45111	Q0WNR6	Q0WNR6	AT-rich interactive domain-containing protein 5	ARID5	1736	sp|Q0WNR6|ARID5_ARATH AT-rich interactive domain-containing protein 5 OS=Arabidopsis thaliana OX=3702 GN=ARID5 PE=1 SV=1	AT1G76510
25.6083	26.0657	26.6599	26.353	26.6453	26.6978	26.7173	26.8982	26.0845	26.9009	27.2509	26.2918							13	13	13	31.1	31.1	31.1	56.328	0	113.23	8529600000	24	123	355400000	0.256896	1	-0.164288	-0.613125	Q0WPR4;Q0WRX3	Q0WPR4	Serine carboxypeptidase-like 34	SCPL34	1748	sp|Q0WPR4|SCP34_ARATH Serine carboxypeptidase-like 34 OS=Arabidopsis thaliana OX=3702 GN=SCPL34 PE=2 SV=2	AT5G23210
25.9177	26.1141	25.5866	25.5309	26.0605	25.6079	25.7623	25.847	25.8417	25.7229	26.0835	26.3361							11	11	11	52.6	52.6	52.6	39.23	0	81.677	4747600000	18	86	263760000	0.767213	0.438218	0.198226	1.47527	Q0WPT7	Q0WPT7	Uncharacterized methyltransferase At2g41040, chloroplastic		1749	sp|Q0WPT7|Y2104_ARATH Uncharacterized methyltransferase At2g41040, chloroplastic OS=Arabidopsis thaliana OX=3702 GN=At2g41040 PE=1 SV=1	AT2G41040
NaN	NaN	NaN	23.8965	24.5707	24.8442	24.7056	24.4675	23.8658	25.1165	25.1841	25.4813							26	23	22	21.2	19.7	18.5	173.36	0	75.785	3475500000	93	53	37371000	1.05625	0.245028	0.663445	1.98254	Q0WPU1	Q0WPU1	Myosin-15	XI-I	1750	sp|Q0WPU1|MYO15_ARATH Myosin-15 OS=Arabidopsis thaliana OX=3702 GN=XI-I PE=1 SV=1	AT4G33200
NaN	NaN	NaN	24.5165	24.8198	24.9843	NaN	25.0133	25.0432	24.97	24.9472	24.4227							13	13	13	18.5	18.5	18.5	88.515	0	30.661	2569600000	46	51	55860000	0.485786	0.767786	-0.20626	-1.06763	Q0WQ75	Q0WQ75		At4g02030	1754	sp|Q0WQ75|VPS51_ARATH Vacuolar protein sorting-associated protein 51 homolog OS=Arabidopsis thaliana OX=3702 GN=VPS51 PE=1 SV=1	AT4G02030
24.37	25.0881	NaN	25.0875	25.005	25.3556	NaN	24.8919	25.459	25.2201	25.061	NaN							13	13	13	24.2	24.2	24.2	92.529	0	36.436	3349200000	42	49	79744000	0.842533	0.37721	-0.33017	-1.64627	Q0WQF4	Q0WQF4	Vacuolar protein sorting-associated protein 53 A	VPS53	1759	sp|Q0WQF4|VP53A_ARATH Vacuolar protein sorting-associated protein 53 A OS=Arabidopsis thaliana OX=3702 GN=VPS53 PE=1 SV=1	AT1G50500
26.5666	25.722	NaN	25.1978	24.366	24.2399	26.6893	25.2585	22.2827	24.9657	25.4097	26.5223					+	AP1_WT_ELUATE_AP1_WT_INPUT	11	11	11	79.7	79.7	79.7	19.809	0	93.464	4399900000	10	105	439990000	1.99595	0.0392147	1.79686	3.24401	Q0WRA3	Q0WRA3		ATE1	1765	tr|Q0WRA3|Q0WRA3_ARATH ATPase E1 OS=Arabidopsis thaliana OX=3702 GN=ATE1 PE=1 SV=1	AT1G13690
28.0007	27.6692	25.7898	28.2179	27.8736	28.2819	26.229	28.3359	28.247	27.9939	27.611	27.703							22	22	20	35.2	35.2	34.2	76.903	0	323.31	26313000000	33	265	797380000	1.57372	0.0887829	-0.991235	-2.59574	Q0WT48	Q0WT48	DnaJ protein ERDJ2A	ERDJ2A	1770	sp|Q0WT48|DNJ21_ARATH DnaJ protein ERDJ2A OS=Arabidopsis thaliana OX=3702 GN=ERDJ2A PE=1 SV=1	AT1G79940
31.2565	31.8087	32.0557	30.3962	30.8378	30.6304	31.5554	30.4287	30.3697	30.4412	31.7452	31.0978					+	AP1_WT_ELUATE_AP1_WT_INPUT	21	21	21	57.4	57.4	57.4	37.911	0	323.31	161190000000	14	731	11513000000	4.16753	0.000742264	1.06921	6.51107	Q0WUV7	Q0WUV7	GDSL esterase/lipase EXL4	EXL4	1774	sp|Q0WUV7|EXL4_ARATH GDSL esterase/lipase EXL4 OS=Arabidopsis thaliana OX=3702 GN=EXL4 PE=1 SV=1	AT1G75910
26.2443	NaN	NaN	22.803	24.8689	24.3544	NaN	22.6739	24.3574	24.6501	25.4714	NaN							11	11	11	18.4	18.4	18.4	89.903	0	67.52	2789400000	44	52	63395000	1.38039	0.129809	1.90658	2.58215	Q0WV78	Q0WV78		At1g30240	1776	tr|Q0WV78|Q0WV78_ARATH Proline-, glutamic acid/leucine-rich protein OS=Arabidopsis thaliana OX=3702 GN=At1g30240 PE=1 SV=1	AT1G30240
26.1158	25.8682	NaN	26.5707	25.2724	26.0975	26.612	26.4682	26.6147	26.3032	26.8691	26.822							18	18	10	33.6	33.6	20.7	69.566	0	65.869	10102000000	38	92	265840000	0.361803	0.979728	0.236303	0.817578	Q0WVF7	Q0WVF7		At3g03060	1779	tr|Q0WVF7|Q0WVF7_ARATH P-loop containing nucleoside triphosphate hydrolases superfamily protein OS=Arabidopsis thaliana OX=3702 GN=At3g03060 PE=1 SV=1	AT3G03060
27.4075	27.4105	27.0292	25.9331	25.625	25.7762	26.9347	26.0626	26.0668	26.2453	25.7141	26.5495					+	AP1_WT_ELUATE_AP1_WT_INPUT	16	16	16	38.2	38.2	38.2	68.366	0	63.421	7449600000	26	106	286520000	2.03479	0.0363997	0.889428	3.21647	Q0WVH0	Q0WVH0		RBL	1781	tr|Q0WVH0|Q0WVH0_ARATH Noc2p family OS=Arabidopsis thaliana OX=3702 GN=RBL PE=1 SV=1	AT3G55510
25.735	26.1496	25.1621	23.2582	23.9246	21.5172	25.9151	23.5206	21.3316	21.6738	25.1578	25.5168					+	AP1_WT_ELUATE_AP1_WT_INPUT	12	12	12	21.4	21.4	21.4	89.305	0	30.997	1457700000	33	61	44173000	3.96598	0.00103981	3.06839	6.15123	Q0WVH7	Q0WVH7		At1g13160	1782	tr|Q0WVH7|Q0WVH7_ARATH Protein SDA1 OS=Arabidopsis thaliana OX=3702 GN=At1g13160 PE=1 SV=1	AT1G13160
28.8237	30.2507	31.7117	28.7728	28.2184	28.1499	30.3137	28.3225	28.0226	28.3112	27.7448	29.5044							58	58	58	67.7	67.7	67.7	120.15	0	323.31	38912000000	54	669	720600000	1.50892	0.100595	1.42522	2.50873	Q0WVM5	Q0WVM5		At1g63810	1785	tr|Q0WVM5|Q0WVM5_ARATH Nucleolar protein OS=Arabidopsis thaliana OX=3702 GN=At1g63810 PE=1 SV=1	AT1G63810
29.3695	29.1256	28.1148	30.0695	30.428	30.5519	29.4105	30.319	30.381	30.3937	30.0701	30.0762					+	AP1_WT_ELUATE_AP1_WT_INPUT	58	58	58	79.8	79.8	79.8	98.49	0	323.31	115470000000	54	1054	2138400000	2.08684	0.0331297	-0.996087	-3.28728	Q0WW26;F4IKA7	Q0WW26	Coatomer subunit gamma		1794	sp|Q0WW26|COPG_ARATH Coatomer subunit gamma OS=Arabidopsis thaliana OX=3702 GN=At4g34450 PE=1 SV=2	AT4G34450
NaN	NaN	NaN	26.524	25.9325	26.5571	NaN	26.8502	27.4195	26.6418	26.2199	25.094							7	7	7	32.8	32.8	32.8	43.607	0	56.823	8043400000	18	73	446860000	1.17017	0.195921	-0.997228	-2.2266	Q1EBV7	Q1EBV7	Sodium/pyruvate cotransporter BASS2, chloroplastic	BASS2	1803	sp|Q1EBV7|BASS2_ARATH Sodium/pyruvate cotransporter BASS2, chloroplastic OS=Arabidopsis thaliana OX=3702 GN=BASS2 PE=1 SV=1	AT2G26900
NaN	NaN	NaN	21.2797	23.0691	21.7562	NaN	22.97	23.3766	23.562	25.5265	24.934					+	AP1_WT_ELUATE_AP1_WT_INPUT	4	4	4	24.4	24.4	24.4	18.445	0	5.8089	1684700000	9	12	187190000	1.95855	0.042315	2.56131	3.62724	Q8LD39;Q1ECK2	Q8LD39;Q1ECK2		At5g09770;At5g64650	1805	tr|Q8LD39|Q8LD39_ARATH At5g09770 OS=Arabidopsis thaliana OX=3702 GN=At5g09770 PE=1 SV=1;tr|Q1ECK2|Q1ECK2_ARATH At5g64650 OS=Arabidopsis thaliana OX=3702 GN=MUB3.17 PE=1 SV=1	AT5G09770;AT5G64650
24.5532	NaN	NaN	25.066	24.8642	24.6728	24.9644	24.9528	24.7645	24.8743	24.9127	24.8189							7	7	7	21.7	21.7	21.7	49.036	0	7.9857	2495000000	21	26	118810000	0.214083	1	-0.053446	-0.529512	Q1G3F7	Q1G3F7		At5g19485	1806	tr|Q1G3F7|Q1G3F7_ARATH Transferases/nucleotidyltransferase OS=Arabidopsis thaliana OX=3702 GN=At5g19485 PE=1 SV=1	AT5G19485
26.0772	26.9677	26.8203	26.3561	25.1485	24.3244	25.8194	23.6711	25.4432	24.5856	27.9584	NaN					+	AP1_WT_ELUATE_AP1_WT_INPUT	3	3	3	42	42	42	18.462	0	284.19	6197800000	0	89	NaN	2.05318	0.0354237	1.80711	3.32655	Q1PDZ0	Q1PDZ0		GRP14	1819	tr|Q1PDZ0|Q1PDZ0_ARATH Glycine-rich protein OS=Arabidopsis thaliana OX=3702 GN=GRP14 PE=1 SV=1	AT5G07510
NaN	25.7265	25.416	20.8895	23.7899	21.9649	24.938	22.5394	21.9738	22.1623	NaN	NaN					+	AP1_WT_ELUATE_AP1_WT_INPUT	6	6	6	15.1	15.1	15.1	66.822	0	9.2168	479730000	32	12	14992000	2.98383	0.00606835	3.14017	5.3732	Q1PEF8	Q1PEF8	Beta-fructofuranosidase, insoluble isoenzyme CWINV2	CWINV2	1821	sp|Q1PEF8|INV2_ARATH Beta-fructofuranosidase, insoluble isoenzyme CWINV2 OS=Arabidopsis thaliana OX=3702 GN=CWINV2 PE=2 SV=1	AT3G52600
28.3312	NaN	NaN	29.4052	30.0875	30.9171	27.2505	29.0623	28.8592	30.4458	28.2826	27.8822					+	AP1_WT_ELUATE_AP1_WT_INPUT	2	2	2	10.7	10.7	10.7	35.219	0.0050637	1.7818	60416000000	19	22	3179800000	2.42336	0.0173407	-1.85955	-4.03294	Q1PFW1	Q1PFW1		At1g15320	1827	tr|Q1PFW1|Q1PFW1_ARATH Seed dormancy control protein OS=Arabidopsis thaliana OX=3702 GN=At1g15320 PE=2 SV=1	AT1G15320
27.2882	27.2128	25.5611	27.228	27.6424	27.5698	26.9294	27.7545	28.1894	28.3338	28.7083	28.2325							27	27	27	76.4	76.4	76.4	53.06	0	322.83	20437000000	25	377	817490000	0.450334	0.824311	-0.464274	-0.970805	Q1WIQ6	Q1WIQ6	NADP-dependent glyceraldehyde-3-phosphate dehydrogenase	ALDH11A3	1828	sp|Q1WIQ6|GAPN_ARATH NADP-dependent glyceraldehyde-3-phosphate dehydrogenase OS=Arabidopsis thaliana OX=3702 GN=ALDH11A3 PE=1 SV=2	AT2G24270
25.2238	26.094	NaN	21.1113	22.0365	21.2672	NaN	22.5618	22.9342	22.5403	NaN	26.379					+	AP1_WT_ELUATE_AP1_WT_INPUT	16	6	6	19.4	10.1	10.1	124.1	0	13.684	2135900000	50	19	42719000	3.91629	0.00114484	3.82369	7.64891	Q27GK7	Q27GK7	Topless-related protein 4	TPR4	1832	sp|Q27GK7|TPR4_ARATH Topless-related protein 4 OS=Arabidopsis thaliana OX=3702 GN=TPR4 PE=1 SV=2	AT3G15880
28.7322	28.3237	27.1771	24.1882	24.0327	21.1124	28.6519	22.7412	23.0747	22.1951	27.0863	28.2455				C2H2	+	AP1_WT_ELUATE_AP1_WT_INPUT	14	14	14	46.5	46.5	46.5	44.703	0	128.35	6981700000	24	129	290910000	5.48254	9.51733e-05	5.14538	9.2313	Q2V3L3	Q2V3L3	Uncharacterized zinc finger protein At4g06634		1844	sp|Q2V3L3|YY1_ARATH Zinc finger transcription factor YY1 OS=Arabidopsis thaliana OX=3702 GN=YY1 PE=1 SV=1	AT4G06634
27.4085	26.17	27.3879	25.5794	25.1876	25.2574	26.4661	24.965	25.1815	25.3141	26.3764	26.4646					+	AP1_WT_ELUATE_AP1_WT_INPUT	12	12	12	32	32	32	43.39	0	22.195	4700800000	19	92	247410000	3.99581	0.000982056	1.46475	6.20366	Q31708	Q31708	Ribosomal protein S4, mitochondrial	RPS4	1848	sp|Q31708|RT04_ARATH Ribosomal protein S4, mitochondrial OS=Arabidopsis thaliana OX=3702 GN=RPS4 PE=1 SV=2	AT2G07734
NaN	NaN	NaN	26.5626	27.6874	27.1202	NaN	27.3155	26.8324	26.7876	25.5312	25.2181					+	AP1_WT_ELUATE_AP1_WT_INPUT	10	10	10	40.2	40.2	40.2	39.175	0	93.702	9129500000	16	90	570600000	2.75717	0.00918718	-1.67631	-5.34726	Q38799	Q38799	Pyruvate dehydrogenase E1 component subunit beta-1, mitochondrial	PDH2	1853	sp|Q38799|ODPB1_ARATH Pyruvate dehydrogenase E1 component subunit beta-1, mitochondrial OS=Arabidopsis thaliana OX=3702 GN=PDH2 PE=1 SV=2	AT5G50850
NaN	NaN	NaN	25.3878	25.5631	25.6105	NaN	25.7244	25.4449	25.2123	25.9467	25.8408							8	8	8	43.8	43.8	43.8	36.664	0	42.248	5026000000	13	90	386620000	1.58259	0.0872654	0.403249	2.93413	Q38814	Q38814	Thiamine thiazole synthase, chloroplastic	THI1	1854	sp|Q38814|THI4_ARATH Thiamine thiazole synthase, chloroplastic OS=Arabidopsis thaliana OX=3702 GN=THI1 PE=1 SV=1	AT5G54770
25.9363	NaN	26.3545	24.5384	25.2241	24.8744	24.5098	25.8704	25.5866	25.5505	25.2432	NaN							4	4	4	31.4	31.4	31.4	19.878	0	41.736	3152000000	8	57	393990000	0.238305	1	0.236895	0.580296	Q38820	Q38820	Mitochondrial import inner membrane translocase subunit TIM23-2	TIM23-2	1855	sp|Q38820|TI232_ARATH Mitochondrial import inner membrane translocase subunit TIM23-2 OS=Arabidopsis thaliana OX=3702 GN=TIM23-2 PE=1 SV=1	AT1G72750
NaN	NaN	NaN	22.9768	21.9282	23.0805	NaN	25.6201	22.6343	25.4483	24.479	24.9883				MIKC_MADS			6	6	6	39.6	39.6	39.6	26.183	0	19.214	1738700000	10	27	173870000	0.4316	0.854958	1.11892	0.968562	Q38836	Q38836	Agamous-like MADS-box protein AGL11	AGL11	1858	sp|Q38836|AGL11_ARATH Agamous-like MADS-box protein AGL11 OS=Arabidopsis thaliana OX=3702 GN=AGL11 PE=1 SV=1	AT4G09960
25.4068	25.294	24.0969	27.0699	27.2964	27.0411	24.9655	27.1504	27.2024	27.1208	26.9111	26.2912					+	AP1_WT_ELUATE_AP1_WT_INPUT	23	17	17	51.9	38.9	38.9	65.493	0	114.75	11630000000	32	204	363440000	2.64218	0.0114923	-1.6526	-4.06196	Q38845	Q38845	Serine/threonine-protein phosphatase 2A 65 kDa regulatory subunit A alpha isoform	PP2AA1	1860	sp|Q38845|2AAA_ARATH Serine/threonine-protein phosphatase 2A 65 kDa regulatory subunit A alpha isoform OS=Arabidopsis thaliana OX=3702 GN=PP2AA1 PE=1 SV=1	AT1G25490
NaN	NaN	NaN	27.3962	28.1097	27.4669	NaN	27.4856	27.8596	26.983	26.6424	26.1374					+	AP1_WT_ELUATE_AP1_WT_INPUT	23	13	13	63.7	48.3	48.3	48.156	0	323.31	12839000000	28	130	458530000	1.98791	0.0398737	-1.1603	-3.68395	Q38858	Q38858	Calreticulin-2	CRT2	1862	sp|Q38858|CALR2_ARATH Calreticulin-2 OS=Arabidopsis thaliana OX=3702 GN=CRT2 PE=1 SV=3	AT1G09210
26.5492	25.8075	26.7166	25.1991	21.5191	21.711	NaN	21.7789	22.0225	22.1806	26.1938	25.4963					+	AP1_WT_ELUATE_AP1_WT_INPUT	2	2	2	22	22	22	27.611	0	66.813	1028300000	5	27	205660000	3.52234	0.00229266	3.75083	5.6839	Q38864	Q38864	Expansin-A5	EXPA5	1865	sp|Q38864|EXPA5_ARATH Expansin-A5 OS=Arabidopsis thaliana OX=3702 GN=EXPA5 PE=2 SV=1	AT3G29030
30.5918	30.3201	31.0109	28.9671	28.575	28.8189	30.6495	28.2141	27.6968	28.3884	30.8491	30.1777					+	AP1_WT_ELUATE_AP1_WT_INPUT	8	8	7	38.1	38.1	34.6	27.817	0	258.91	46958000000	9	192	5217600000	5.60857	7.881e-05	2.1565	9.53166	Q38865	Q38865	Expansin-A6	EXPA6	1866	sp|Q38865|EXPA6_ARATH Expansin-A6 OS=Arabidopsis thaliana OX=3702 GN=EXPA6 PE=2 SV=2	AT2G28950
25.7861	25.5011	24.0264	21.3019	21.454	22.5494	25.3196	23.2075	22.5299	22.1876	24.7001	26.3645				TALE	+	AP1_WT_ELUATE_AP1_WT_INPUT	8	7	7	30.9	28.3	28.3	42.753	0	7.7127	999090000	12	15	83257000	4.36814	0.000537691	3.07791	6.88264	Q38874	Q38874	Homeobox protein SHOOT MERISTEMLESS	STM	1870	sp|Q38874|STM_ARATH Homeobox protein SHOOT MERISTEMLESS OS=Arabidopsis thaliana OX=3702 GN=STM PE=1 SV=2	AT1G62360
29.3464	29.5283	28.42	22.4652	22.1659	20.894	29.2534	22.069	21.9482	22.7408	27.5771	28.7475				MIKC_MADS	+	AP1_WT_ELUATE_AP1_WT_INPUT	14	14	14	54.5	54.5	54.5	27.536	0	295.8	10573000000	9	177	1174800000	8.00975	4.34508e-06	6.76492	17.116	Q38876	Q38876	Agamous-like MADS-box protein AGL8	AGL8	1871	sp|Q38876|AGL8_ARATH Agamous-like MADS-box protein AGL8 OS=Arabidopsis thaliana OX=3702 GN=AGL8 PE=1 SV=1	AT5G60910
27.1623	27.569	27.3004	28.9937	29.218	29.1184	27.3659	28.698	29.2196	28.9838	28.9924	28.7218					+	AP1_WT_ELUATE_AP1_WT_INPUT	41	41	34	69.3	69.3	60.5	91.847	0	323.31	43609000000	44	533	991100000	2.28067	0.0228339	-1.18659	-3.55322	Q38882	Q38882	Phospholipase D alpha 1	PLDALPHA1	1873	sp|Q38882|PLDA1_ARATH Phospholipase D alpha 1 OS=Arabidopsis thaliana OX=3702 GN=PLDALPHA1 PE=1 SV=2	AT3G15730
24.936	25.6782	24.7928	27.4662	28.4765	28.1355	26.1774	28.1909	28.2654	28.0396	27.5426	27.2207					+	AP1_WT_ELUATE_AP1_WT_INPUT	19	19	19	70.7	70.7	70.7	36.388	0	160.13	20026000000	17	187	1178000000	2.7184	0.00988553	-2.03774	-4.1718	Q38884;F4II66	Q38884	Eukaryotic translation initiation factor 3 subunit I	TIF3I1	1874	sp|Q38884|EIF3I_ARATH Eukaryotic translation initiation factor 3 subunit I OS=Arabidopsis thaliana OX=3702 GN=TIF3I1 PE=2 SV=2	AT2G46280
24.1009	NaN	NaN	24.422	23.6297	23.7581	24.5372	24.6585	24.4184	24.6799	24.725	24.6141							8	8	8	20.9	20.9	20.9	59.492	0	111.55	1797600000	20	49	89881000	0.409876	0.891808	0.233233	0.910525	Q38885	Q38885	Preprotein translocase subunit SCY1, chloroplastic	SCY1	1875	sp|Q38885|SCY1_ARATH Preprotein translocase subunit SCY1, chloroplastic OS=Arabidopsis thaliana OX=3702 GN=SCY1 PE=1 SV=2	AT2G18710
24.6509	24.9699	25.4369	23.3471	22.5767	23.0382	25.7166	22.7994	21.7891	23.2353	24.3384	25.5229				TALE	+	AP1_WT_ELUATE_AP1_WT_INPUT	10	9	9	29.1	27.3	27.3	69.492	0	65.276	911490000	23	69	39630000	4.53074	0.000416513	2.30828	7.19423	Q38897	Q38897	Homeobox protein BEL1 homolog	BEL1	1878	sp|Q38897|BEL1_ARATH Homeobox protein BEL1 homolog OS=Arabidopsis thaliana OX=3702 GN=BEL1 PE=1 SV=2	AT5G41410
27.6452	27.8751	28.2755	21.3833	21.6701	22.126	NaN	22.7853	27.0118	27.2097	29.1052	28.5284					+	AP1_WT_ELUATE_AP1_WT_INPUT	9	6	6	71.1	61.8	61.8	18.492	0	51.96	6914600000	9	27	768290000	2.31948	0.0212124	4.58819	3.71711	Q38900	Q38900	Peptidyl-prolyl cis-trans isomerase CYP19-1	CYP19-1	1880	sp|Q38900|CP19A_ARATH Peptidyl-prolyl cis-trans isomerase CYP19-1 OS=Arabidopsis thaliana OX=3702 GN=CYP19-1 PE=2 SV=1	AT2G16600
NaN	24.7554	NaN	24.5188	25.3596	25.0604	NaN	24.5029	24.553	24.1297	24.4443	NaN							5	3	2	26.9	17.8	10.7	21.571	0	4.682	1990000000	8	26	248750000	0.0944779	1	-0.0875632	-0.258727	Q9SBJ6;Q38902	Q9SBJ6;Q38902	Rac-like GTP-binding protein ARAC6;Rac-like GTP-binding protein ARAC1	ARAC6;ARAC1	1881	sp|Q9SBJ6|RAC6_ARATH Rac-like GTP-binding protein ARAC6 OS=Arabidopsis thaliana OX=3702 GN=ARAC6 PE=1 SV=2;sp|Q38902|RAC1_ARATH Rac-like GTP-binding protein ARAC1 OS=Arabidopsis thaliana OX=3702 GN=ARAC1 PE=1 SV=1	AT2G17800;AT4G35950
27.062	27.0911	26.6878	28.7217	28.4937	29.0662	27.364	28.6937	28.6449	28.2606	27.2422	27.4565					+	AP1_WT_ELUATE_AP1_WT_INPUT	18	18	18	71.9	71.9	71.9	34.707	0	99.267	30604000000	17	194	1800200000	5.63517	7.52764e-05	-1.4962	-9.59607	Q38906	Q38906	Translocase of chloroplast 34, chloroplastic	TOC34	1883	sp|Q38906|TOC34_ARATH Translocase of chloroplast 34, chloroplastic OS=Arabidopsis thaliana OX=3702 GN=TOC34 PE=1 SV=2	AT5G05000
25.1119	25.4925	24.2799	21.861	22.6193	22.4696	25.513	21.3034	22.855	22.6071	25.4822	25.2929				AP2	+	AP1_WT_ELUATE_AP1_WT_INPUT	9	9	9	24.1	24.1	24.1	61.724	0	31.004	1717400000	21	28	81781000	5.57463	8.45697e-05	2.90948	9.45001	Q38914;A0JPZ8;Q94AN4;Q1PFE1;Q8GWK2;Q6J9N8;Q6PQQ3;Q5YGP7;Q52QU2;Q6PQQ4	Q38914	AP2-like ethylene-responsive transcription factor ANT	ANT	1887	sp|Q38914|ANT_ARATH AP2-like ethylene-responsive transcription factor ANT OS=Arabidopsis thaliana OX=3702 GN=ANT PE=1 SV=2	AT4G37750
NaN	NaN	NaN	22.962	25.3659	25.1928	24.7534	25.0527	25.37	25.2646	25.5298	25.3255							6	6	2	39.8	39.8	19.4	21.777	0	9.5779	3159600000	8	45	394950000	0.234007	1	0.334919	0.574775	Q38937;Q38919	Q38937;Q38919	Rac-like GTP-binding protein ARAC5;Rac-like GTP-binding protein ARAC4	ARAC5;ARAC4	1892	sp|Q38937|RAC5_ARATH Rac-like GTP-binding protein ARAC5 OS=Arabidopsis thaliana OX=3702 GN=ARAC5 PE=1 SV=1;sp|Q38919|RAC4_ARATH Rac-like GTP-binding protein ARAC4 OS=Arabidopsis thaliana OX=3702 GN=ARAC4 PE=1 SV=1	AT1G20090;AT1G75840
NaN	NaN	NaN	26.4254	26.7484	26.9842	24.4901	27.1066	27.503	27.1964	24.6735	NaN					+	AP1_WT_ELUATE_AP1_WT_INPUT	14	14	14	49.6	49.6	49.6	38.268	0	323.31	11369000000	15	118	757920000	3.85789	0.00126408	-2.41224	-8.56893	Q38942	Q38942	Protein RAE1	RAE1	1893	sp|Q38942|RAE1_ARATH Protein RAE1 OS=Arabidopsis thaliana OX=3702 GN=RAE1 PE=1 SV=2	AT1G80670
26.0548	25.9376	24.9941	27.4186	27.8774	27.8399	25.1564	27.673	27.3054	27.6278	27.4105	26.8852					+	AP1_WT_ELUATE_AP1_WT_INPUT	25	25	14	62.2	62.2	36.3	65.597	0	323.31	18966000000	30	326	632190000	2.53257	0.0141198	-1.55057	-3.90569	Q38950	Q38950	Serine/threonine-protein phosphatase 2A 65 kDa regulatory subunit A beta isoform	PP2AA2	1895	sp|Q38950|2AAB_ARATH Serine/threonine-protein phosphatase 2A 65 kDa regulatory subunit A beta isoform OS=Arabidopsis thaliana OX=3702 GN=PP2AA2 PE=1 SV=2	AT3G25800
NaN	NaN	NaN	25.4052	26.1857	26.131	25.2062	26.359	25.821	26.4059	26.545	26.005							23	13	13	56.9	32.7	32.7	65.516	0	145.36	6363600000	29	124	219440000	0.149582	1	-0.132537	-0.389299	Q38951	Q38951	Serine/threonine-protein phosphatase 2A 65 kDa regulatory subunit A gamma isoform	PP2AA3	1896	sp|Q38951|2AAG_ARATH Serine/threonine-protein phosphatase 2A 65 kDa regulatory subunit A gamma isoform OS=Arabidopsis thaliana OX=3702 GN=PP2AA3 PE=1 SV=2	AT1G13320
24.0163	NaN	23.5077	27.0619	26.6089	26.992	NaN	26.6688	27.1175	27.1049	25.9988	25.7711					+	AP1_WT_ELUATE_AP1_WT_INPUT	37	37	36	37.9	37.9	37.2	134.16	0	323.31	22028000000	65	230	338900000	2.4952	0.0151113	-2.10219	-4.15262	Q38953	Q38953	Probable pre-mRNA-splicing factor ATP-dependent RNA helicase		1897	sp|Q38953|DEAH5_ARATH Probable pre-mRNA-splicing factor ATP-dependent RNA helicase DEAH5 OS=Arabidopsis thaliana OX=3702 GN=At3g26560 PE=1 SV=2	AT3G26560
24.3948	23.5464	27.1867	28.3563	28.0405	28.5666	24.2565	27.1998	27.7518	27.8751	27.7017	27.6457							68	68	45	47.3	47.3	32.4	251.38	0	305.73	24482000000	123	415	199040000	1.64893	0.0770504	-2.17637	-2.69664	Q38970	Q38970	Acetyl-CoA carboxylase 1;Biotin carboxylase	ACC1	1900	sp|Q38970|ACC1_ARATH Acetyl-CoA carboxylase 1 OS=Arabidopsis thaliana OX=3702 GN=ACC1 PE=1 SV=1	AT1G36160
26.0111	26.7379	NaN	29.4113	28.9322	28.9506	25.9681	29.195	29.2308	28.5425	27.3845	25.9137					+	AP1_WT_ELUATE_AP1_WT_INPUT	22	22	9	35.4	35.4	17	68.134	0	323.31	32081000000	31	229	1034900000	5.06032	0.000183418	-2.64068	-8.97893	Q39002	Q39002	ADP,ATP carrier protein 1, chloroplastic	AATP1	1902	sp|Q39002|TLC1_ARATH ADP,ATP carrier protein 1, chloroplastic OS=Arabidopsis thaliana OX=3702 GN=AATP1 PE=1 SV=2	AT1G80300
NaN	NaN	NaN	26.6183	27.042	27.6815	25.4557	27.1351	27.804	26.8277	26.7645	25.5898							23	23	23	53.9	53.9	53.9	66.122	0	50.066	10372000000	31	90	334590000	1.81821	0.0554492	-1.24814	-3.1937	Q39033;Q9LY51	Q39033	Phosphoinositide phospholipase C 2	PLC2	1906	sp|Q39033|PLCD2_ARATH Phosphoinositide phospholipase C 2 OS=Arabidopsis thaliana OX=3702 GN=PLC2 PE=1 SV=1	AT3G08510
24.9906	25.3755	24.4484	27.53	28.3116	28.051	25.9618	28.089	28.0024	27.9417	26.4337	26.0532					+	AP1_WT_ELUATE_AP1_WT_INPUT	46	4	4	64.2	8.8	8.8	73.56	0	323.31	18964000000	31	126	611750000	4.7415	0.000306527	-2.44376	-7.6128	Q39043	Q39043	Mediator of RNA polymerase II transcription subunit 37f	MED37F	1908	sp|Q39043|BIP2_ARATH Heat shock 70 kDa protein BIP2 OS=Arabidopsis thaliana OX=3702 GN=BIP2 PE=1 SV=2	AT5G42020
25.2052	24.8866	NaN	27.1247	27.3437	27.0163	24.9927	27.5571	27.5767	27.5736	27.0287	26.329					+	AP1_WT_ELUATE_AP1_WT_INPUT	14	14	14	45.8	45.8	45.8	47.237	0	109.17	10057000000	25	121	402270000	2.6511	0.0113056	-1.67691	-4.22193	Q39048	Q39048	Protein ECERIFERUM 1	CER2	1909	sp|Q39048|CER2_ARATH Protein ECERIFERUM 2 OS=Arabidopsis thaliana OX=3702 GN=CER2 PE=1 SV=1	AT4G24510
30.0839	29.8646	29.6947	31.1803	30.8858	31.1992	29.7193	31.1328	31.5524	30.9171	30.7246	30.1547					+	AP1_WT_ELUATE_AP1_WT_INPUT	37	37	37	67	67	67	65.393	0	323.31	168590000000	30	881	5619800000	3.86246	0.00126182	-1.10429	-5.97136	Q39085	Q39085	Delta(24)-sterol reductase	DIM	1914	sp|Q39085|DIM_ARATH Delta(24)-sterol reductase OS=Arabidopsis thaliana OX=3702 GN=DIM PE=1 SV=2	AT3G19820
25.5782	NaN	NaN	25.9032	25.65	25.7194	NaN	25.259	25.7132	25.5178	25.1912	25.306							7	7	7	29.1	29.1	29.1	34.291	0	30.746	4461100000	17	64	262420000	0.926526	0.317641	-0.268639	-1.7792	Q39099	Q39099	Xyloglucan endotransglucosylase/hydrolase protein 4	XTH4	1916	sp|Q39099|XTH4_ARATH Xyloglucan endotransglucosylase/hydrolase protein 4 OS=Arabidopsis thaliana OX=3702 GN=XTH4 PE=1 SV=1	AT2G06850
NaN	NaN	NaN	26.712	26.8485	26.7722	25.6292	26.8257	26.8686	26.2905	25.5841	25.3563					+	AP1_WT_ELUATE_AP1_WT_INPUT	9	8	8	41.2	35.3	35.3	28.178	0	38.888	8413700000	11	75	764880000	4.19714	0.000705851	-1.19638	-8.4634	Q39101	Q39101	Ferritin-1, chloroplastic	FER1	1917	sp|Q39101|FRI1_ARATH Ferritin-1, chloroplastic OS=Arabidopsis thaliana OX=3702 GN=FER1 PE=1 SV=1	AT5G01600
27.2635	27.3053	26.477	26.9357	26.1298	26.5057	27.0797	26.268	26.2693	26.4113	27.345	27.4576					+	AP1_WT_ELUATE_AP1_WT_INPUT	43	35	31	36.7	30.5	28.4	172.91	0	124.77	9590200000	91	151	105390000	2.57343	0.0131233	0.734704	3.96371	Q39160	Q39160	Myosin-5	XI-1	1924	sp|Q39160|MYO5_ARATH Myosin-5 OS=Arabidopsis thaliana OX=3702 GN=XI-1 PE=1 SV=1	AT1G17580
27.7573	27.4529	25.9638	26.8174	25.9904	26.6276	27.0509	25.6066	21.8769	25.049	27.4233	27.1022							2	2	2	33.8	33.8	33.8	8.524	0	323.31	8048900000	3	94	2683000000	1.35187	0.137599	1.79709	2.29705	Q39182	Q39182	Defensin-like protein 2	PDF2.2	1926	sp|Q39182|DEF02_ARATH Defensin-like protein 2 OS=Arabidopsis thaliana OX=3702 GN=PDF2.2 PE=2 SV=1	AT2G02100
30.0367	30.0871	29.1225	28.0478	27.7909	27.5174	29.566	28.4105	27.7699	28.0275	28.8052	29.243					+	AP1_WT_ELUATE_AP1_WT_INPUT	36	36	36	69.4	69.4	69.4	72.89	0	311.87	27466000000	37	517	742330000	4.06986	0.000864196	1.54942	6.33505	Q39189	Q39189	DEAD-box ATP-dependent RNA helicase 7	RH7	1927	sp|Q39189|RH7_ARATH DEAD-box ATP-dependent RNA helicase 7 OS=Arabidopsis thaliana OX=3702 GN=RH7 PE=1 SV=2	AT5G62190
30.0401	29.9724	29.3887	32.4812	32.554	32.4974	28.3806	32.1334	31.6496	32.0033	30.2586	30.1899					+	AP1_WT_ELUATE_AP1_WT_INPUT	14	14	7	59.2	59.2	27.2	30.692	0	323.31	326270000000	8	493	40784000000	4.7749	0.000290872	-2.51481	-7.68073	Q39196	Q39196	Probable aquaporin PIP1-4	PIP1.4	1929	sp|Q39196|PIP14_ARATH Probable aquaporin PIP1-4 OS=Arabidopsis thaliana OX=3702 GN=PIP1.4 PE=1 SV=1	AT4G00430
24.9411	25.3468	NaN	24.0794	24.5151	20.8353	25.0879	22.7117	24.2598	24.1017	25.309	25.9195							11	10	10	42.1	40.5	40.5	47.733	0	56.822	1840700000	26	43	70796000	1.75783	0.0621504	1.90372	2.90457	Q39199	Q39199	DNA repair protein recA homolog 1, chloroplastic	RECA	1930	sp|Q39199|RECAC_ARATH DNA repair protein recA homolog 1, chloroplastic OS=Arabidopsis thaliana OX=3702 GN=RECA PE=2 SV=1	AT1G79050
27.9434	27.6784	28.267	27.6842	27.3546	26.9436	28.2498	27.484	27.5438	27.507	28.0563	28.0294					+	AP1_WT_ELUATE_AP1_WT_INPUT	19	19	15	81.5	81.5	71.2	35.461	0	323.31	22946000000	14	226	1639000000	2.94591	0.00648641	0.617831	4.50595	Q39211	Q39211	DNA-directed RNA polymerases II, IV and V subunit 3	NRPB3	1932	sp|Q39211|NRPB3_ARATH DNA-directed RNA polymerases II, IV and V subunit 3 OS=Arabidopsis thaliana OX=3702 GN=NRPB3 PE=1 SV=1	AT2G15430
NaN	NaN	NaN	24.1286	24.5482	24.4774	25.1975	24.6926	24.9342	24.9926	24.1849	NaN							7	7	7	29.1	29.1	29.1	43.367	0	14.454	2269600000	21	18	108080000	0.0657742	1	0.0622803	0.184818	Q39216	Q39216		F8A5.14	1934	tr|Q39216|Q39216_ARATH DNA-directed RNA polymerases I and III subunit RPAC1 OS=Arabidopsis thaliana OX=3702 GN=F8A5.14 PE=1 SV=1	AT1G60620
NaN	NaN	NaN	26.0453	25.931	26.3187	NaN	26.2734	26.5074	25.8022	25.2148	24.4164					+	AP1_WT_ELUATE_AP1_WT_INPUT	12	12	11	49.9	49.9	47.3	42.793	0	92.292	5223200000	23	107	227100000	2.55697	0.0134567	-1.33071	-4.8774	Q39221	Q39221	SEC12-like protein 2	STL2P	1936	sp|Q39221|STLP2_ARATH SEC12-like protein 2 OS=Arabidopsis thaliana OX=3702 GN=STL2P PE=1 SV=4	AT2G01470
25.9234	26.0599	NaN	27.8074	27.4555	27.5914	26.2261	27.1456	27.4899	27.6097	27.3213	26.8184					+	AP1_WT_ELUATE_AP1_WT_INPUT	16	16	14	53.7	53.7	47.1	40.45	0	80.574	15522000000	20	140	776100000	2.56125	0.0133712	-1.04676	-4.08283	Q39227	Q39227	24-methylenesterol C-methyltransferase 2	SMT2	1938	sp|Q39227|SMT2_ARATH 24-methylenesterol C-methyltransferase 2 OS=Arabidopsis thaliana OX=3702 GN=SMT2 PE=1 SV=2	AT1G20330
NaN	NaN	NaN	25.6847	26.2785	26.1777	NaN	26.578	26.5793	26.298	27.05	25.5699							19	19	19	58.1	58.1	58.1	51.628	0	154.17	6682100000	28	93	238650000	0.0355527	1	0.0438941	0.102896	Q39230	Q39230	Serine--tRNA ligase		1940	sp|Q39230|SYSC_ARATH Serine--tRNA ligase, cytoplasmic OS=Arabidopsis thaliana OX=3702 GN=At5g27470 PE=1 SV=1	AT5G27470
26.8796	26.6476	NaN	26.299	26.0245	25.7	27.0856	26	25.4405	26.1591	26.714	27.0189					+	AP1_WT_ELUATE_AP1_WT_INPUT	13	13	13	23.5	23.5	23.5	78.148	0	58.2	12011000000	38	80	316080000	3.57699	0.00208418	0.931927	5.78364	Q39238	Q39238	Serine/threonine-protein kinase TOUSLED	TOUSLED	1943	sp|Q39238|TSL_ARATH Serine/threonine-protein kinase TOUSLED OS=Arabidopsis thaliana OX=3702 GN=TOUSLED PE=1 SV=1	AT5G20930
25.0981	24.5671	NaN	25.8859	26.2451	25.7863	25.3885	25.0827	25.3539	24.774	24.5765	25.5246							8	8	5	78.1	78.1	61.2	17.857	0	65.965	5147100000	7	71	735300000	0.841962	0.37747	-0.490392	-1.60077	Q39255;O65674;O49484;Q9M1X5	Q39255	SKP1-like protein 1A	SKP1A	1949	sp|Q39255|SKP1A_ARATH SKP1-like protein 1A OS=Arabidopsis thaliana OX=3702 GN=SKP1A PE=1 SV=1	AT1G75950
NaN	NaN	NaN	29.6984	30.0969	29.9657	25.0114	30.5466	30.5484	29.8641	27.4506	27.1389					+	AP1_WT_ELUATE_AP1_WT_INPUT	21	21	11	81.7	81.7	53.5	26.06	0	223.3	61936000000	15	272	4129100000	3.50914	0.00233877	-3.58637	-6.58133	Q39258	Q39258	V-type proton ATPase subunit E1	VHA-E1	1950	sp|Q39258|VATE1_ARATH V-type proton ATPase subunit E1 OS=Arabidopsis thaliana OX=3702 GN=VHA-E1 PE=1 SV=2	AT4G11150
28.0762	27.9858	28.2908	27.0152	26.7155	26.8367	28.1783	26.4118	26.7791	26.8554	27.2523	27.8458				FAR1	+	AP1_WT_ELUATE_AP1_WT_INPUT	29	29	19	46.4	46.4	34.1	90.496	0	323.31	15703000000	43	181	365190000	4.32727	0.000576911	1.16925	6.80582	Q3E7I5	Q3E7I5	Protein FAR1-RELATED SEQUENCE 12	FRS12	1954	sp|Q3E7I5|FRS12_ARATH Protein FAR1-RELATED SEQUENCE 12 OS=Arabidopsis thaliana OX=3702 GN=FRS12 PE=2 SV=1	AT5G18960
NaN	24.4059	NaN	26.3704	22.6947	21.5299	NaN	22.6357	22.5698	20.6416	24.9806	26.192							6	3	3	12.3	8.9	8.9	50.757	0	7.8099	7140300000	24	19	297510000	1.07665	0.235351	2.45251	2.01439	Q3E8E5	Q3E8E5	Putative myrosinase 3	TGG3	1956	sp|Q3E8E5|BGL39_ARATH Putative myrosinase 3 OS=Arabidopsis thaliana OX=3702 GN=TGG3 PE=5 SV=1	AT5G48375
27.1983	27.0912	27.2238	21.5388	21.978	20.1563	27.3657	21.6074	23.0726	22.0564	26.1417	26.7831					+	AP1_WT_ELUATE_AP1_WT_INPUT	14	14	14	31.9	31.9	31.9	53.768	0	43.001	1578900000	22	51	71767000	6.60605	1.84822e-05	5.23238	12.2121	Q3ED78	Q3ED78	Zinc finger CCCH domain-containing protein 7		1968	sp|Q3ED78|C3H7_ARATH Zinc finger CCCH domain-containing protein 7 OS=Arabidopsis thaliana OX=3702 GN=At1g21570 PE=1 SV=1	AT1G21570
25.135	NaN	NaN	25.6737	24.7567	25.2371	25.7061	25.4173	25.5028	25.5144	25.4594	25.7042							11	11	11	25.1	25.1	25.1	66.255	0	22.041	4039400000	31	49	130300000	0.33227	1	0.150862	0.766672	Q3EDF8	Q3EDF8	Pentatricopeptide repeat-containing protein At1g09900		1969	sp|Q3EDF8|PPR28_ARATH Pentatricopeptide repeat-containing protein At1g09900 OS=Arabidopsis thaliana OX=3702 GN=At1g09900 PE=2 SV=1	AT1G09900
25.5752	24.5773	NaN	24.4342	24.8604	25.2161	22.4733	24.5534	25.037	25.6098	27.8848	26.2822							3	3	3	21.2	21.2	21.2	25.027	0	86.482	4880000000	2	144	2440000000	0.194974	1	0.406724	0.486409	Q41951	Q41951	Aquaporin TIP2-1;Aquaporin TIP2-1, N-terminally processed	TIP2-1	1973	sp|Q41951|TIP21_ARATH Aquaporin TIP2-1 OS=Arabidopsis thaliana OX=3702 GN=TIP2-1 PE=1 SV=2	AT3G16240
27.3374	27.0075	NaN	29.4492	29.2214	29.7234	26.0802	28.597	28.8408	28.571	27.8494	27.5741					+	AP1_WT_ELUATE_AP1_WT_INPUT	2	2	2	17	17	17	25.848	0	323.31	49969000000	2	74	24985000000	3.3863	0.00290448	-1.89741	-5.44021	Q41963	Q41963	Aquaporin TIP1-2;Aquaporin TIP1-2, N-terminally processed	TIP1-2	1974	sp|Q41963|TIP12_ARATH Aquaporin TIP1-2 OS=Arabidopsis thaliana OX=3702 GN=TIP1-2 PE=1 SV=2	AT3G26520
25.6963	NaN	NaN	26.3023	26.936	26.5337	26.2066	26.9261	26.7229	26.795	25.9963	25.9671					+	AP1_WT_ELUATE_AP1_WT_INPUT	13	13	13	70.5	70.5	70.5	30.663	0	128.89	8781700000	12	129	731810000	2.92169	0.00676541	-0.736063	-4.89748	Q41969	Q41969	Eukaryotic translation initiation factor 2 subunit beta	EMB1401	1975	sp|Q41969|IF2B_ARATH Eukaryotic translation initiation factor 2 subunit beta OS=Arabidopsis thaliana OX=3702 GN=EIF2B PE=1 SV=3	AT5G20920
NaN	NaN	25.7311	25.6132	21.1127	25.6573	25.1524	25.8137	22.7456	25.9686	25.4021	25.5382							6	6	6	67.9	67.9	67.9	13.955	0	31.199	4708500000	7	33	672640000	0.4174	0.87998	0.970768	0.924078	Q42044	Q42044		At2g45180	1977	tr|Q42044|Q42044_ARATH At2g45180 OS=Arabidopsis thaliana OX=3702 GN=At2g45180 PE=1 SV=2	AT2G45180
27.5335	27.7217	28.0065	24.7254	24.7862	24.3417	27.2514	24.5743	24.0764	24.3803	27.1968	27.0073					+	AP1_WT_ELUATE_AP1_WT_INPUT	18	18	18	38.1	38.1	38.1	68.591	0	35.472	3495600000	31	48	112760000	7.70713	5.87716e-06	2.97212	15.9266	Q42059;Q8L7I0	Q42059	Endoglucanase 6		1978	sp|Q42059|GUN6_ARATH Endoglucanase 6 OS=Arabidopsis thaliana OX=3702 GN=At1g64390 PE=2 SV=2	AT1G64390
29.0367	29.4576	29.1842	28.5981	28.4182	28.4033	29.4135	28.5124	27.0558	28.3736	30.343	29.3608					+	AP1_WT_ELUATE_AP1_WT_INPUT	21	2	2	64.3	14.3	14.3	27.948	0	228.17	45353000000	13	158	3488700000	2.67556	0.0107512	1.23907	4.10994	Q42064	Q42064	60S ribosomal protein L8-3	RPL8C	1979	sp|Q42064|RL83_ARATH 60S ribosomal protein L8-3 OS=Arabidopsis thaliana OX=3702 GN=RPL8C PE=2 SV=2	AT4G36130
29.6566	29.217	29.7564	30.9513	30.8746	30.6628	30.1924	30.6253	30.8779	30.7416	31.5574	30.1069							20	20	7	89.7	89.7	31.2	34.133	0	323.31	198170000000	9	769	22018000000	1.22931	0.175718	-0.70781	-2.13044	Q42112	Q42112	60S acidic ribosomal protein P0-2	RPP0B	1981	sp|Q42112|RLA02_ARATH 60S acidic ribosomal protein P0-2 OS=Arabidopsis thaliana OX=3702 GN=RPP0B PE=1 SV=2	AT3G09200
25.0325	24.9723	NaN	26.9197	26.6974	25.8556	NaN	26.0309	25.3869	25.8895	26.4361	26.1308							13	13	3	71.7	71.7	22.8	25.977	0	218.34	9294500000	14	126	663900000	0.559279	0.65822	-0.487039	-1.16946	Q42134	Q42134	Proteasome subunit alpha type-5-B	PAE2	1982	sp|Q42134|PSA5B_ARATH Proteasome subunit alpha type-5-B OS=Arabidopsis thaliana OX=3702 GN=PAE2 PE=1 SV=2	AT3G14290
NaN	NaN	NaN	29.169	28.2837	28.701	NaN	28.3711	28.9642	28.4087	24.975	24.3114					+	AP1_WT_ELUATE_AP1_WT_INPUT	11	11	11	39.7	39.7	39.7	23.917	0	298.84	32091000000	13	167	2468500000	4.88486	0.000242872	-4.00641	-12.9523	Q42139	Q42139		F10M6.100	1983	tr|Q42139|Q42139_ARATH AT4g32260/F10M6_100 OS=Arabidopsis thaliana OX=3702 GN=PDE334 PE=1 SV=2	AT4G32260
31.1314	31.2861	31.1462	30.8097	30.8284	30.7441	30.6542	31.1089	31.1277	30.6438	30.7591	30.5967							27	27	15	72.9	72.9	46.6	29.803	0	323.31	168370000000	16	687	10523000000	0.138432	1	0.0518614	0.359004	Q42262	Q42262	40S ribosomal protein S3a-2	RPS3AB	1984	sp|Q42262|RS3A2_ARATH 40S ribosomal protein S3a-2 OS=Arabidopsis thaliana OX=3702 GN=RPS3AB PE=2 SV=3	AT4G34670
23.7539	25.0478	26.5585	29.7618	29.8588	29.2499	28.0161	30.1536	30.7595	29.9983	28.5317	27.7972					+	AP1_WT_ELUATE_AP1_WT_INPUT	27	27	27	63.7	63.7	63.7	59.159	0	323.31	78027000000	27	541	2889900000	2.74778	0.00935429	-3.34613	-4.2144	Q42290	Q42290	Probable mitochondrial-processing peptidase subunit beta		1985	sp|Q42290|MPPB_ARATH Probable mitochondrial-processing peptidase subunit beta, mitochondrial OS=Arabidopsis thaliana OX=3702 GN=MPPbeta PE=1 SV=2	AT3G02090
NaN	NaN	NaN	28.1427	28.3733	27.8553	23.8349	28.4028	28.7495	28.5133	25.3737	24.2541					+	AP1_WT_ELUATE_AP1_WT_INPUT	7	7	7	56.7	56.7	56.7	15.084	0	323.31	24913000000	8	124	3114100000	4.92247	0.000230935	-3.85187	-10.9184	Q42342	Q42342	Cytochrome b5 isoform E	CYTB5-E	1987	sp|Q42342|CYB5E_ARATH Cytochrome b5 isoform E OS=Arabidopsis thaliana OX=3702 GN=CYTB5-E PE=1 SV=2	AT5G53560
27.3578	27.6287	27.7652	28.0551	27.9029	27.8257	27.9881	28.6759	26.8755	28.2332	29.5365	27.7227							7	3	3	35.8	17.5	17.5	13.705	0	20.202	30183000000	4	107	7545700000	0.0647111	1	0.0718012	0.178929	Q42351	Q42351	60S ribosomal protein L34-1	RPL34A	1989	sp|Q42351|RL341_ARATH 60S ribosomal protein L34-1 OS=Arabidopsis thaliana OX=3702 GN=RPL34A PE=2 SV=1	AT1G26880
25.3894	25.1656	23.8197	25.7934	25.5511	24.953	NaN	25.1441	22.0647	25.1067	24.7901	24.9031							17	17	17	26.9	26.9	26.9	107.33	0	47.855	3426300000	40	83	85657000	0.0234358	1	0.0447613	0.0677483	Q42371	Q42371	LRR receptor-like serine/threonine-protein kinase ERECTA	ERECTA	1990	sp|Q42371|ERECT_ARATH LRR receptor-like serine/threonine-protein kinase ERECTA OS=Arabidopsis thaliana OX=3702 GN=ERECTA PE=1 SV=1	AT2G26330
28.9304	28.6556	29.6258	29.3078	28.7077	28.8366	28.8654	28.9658	28.7811	28.9291	27.855	28.7711							29	29	22	67.7	67.7	53.1	54.009	0	323.31	52879000000	26	474	2033800000	0.2284	1	-0.137482	-0.555113	Q42384	Q42384	Protein pleiotropic regulatory locus 1	PRL1	1992	sp|Q42384|PRL1_ARATH Protein pleiotropic regulatory locus 1 OS=Arabidopsis thaliana OX=3702 GN=PRL1 PE=1 SV=1	AT4G15900
25.1474	24.8663	NaN	25.7607	24.8127	24.6696	25.3721	24.8672	25.3082	25.5347	26.8398	26.4303							7	7	7	53.4	53.4	53.4	13.109	0	165.51	4069500000	8	64	508680000	0.732464	0.469837	0.572343	1.43484	Q42403	Q42403	Thioredoxin H3	TRX3	1995	sp|Q42403|TRXH3_ARATH Thioredoxin H3 OS=Arabidopsis thaliana OX=3702 GN=TRX3 PE=1 SV=1	AT5G42980
27.257	25.7241	NaN	26.2334	25.224	25.133	25.3374	24.3831	25.8953	26.5363	27.6514	26.9961							11	11	8	75.6	75.6	66.3	18.378	0	140.18	7545000000	10	63	754500000	1.03709	0.254053	1.02569	1.88672	Q42406	Q42406	Peptidyl-prolyl cis-trans isomerase CYP18-4	CYP18-4	1997	sp|Q42406|CP18D_ARATH Peptidyl-prolyl cis-trans isomerase CYP18-4 OS=Arabidopsis thaliana OX=3702 GN=CYP18-4 PE=1 SV=1	AT4G34870
25.3366	25.3724	NaN	26.9119	26.4382	26.3664	25.0199	26.175	26.463	26.6231	26.9895	26.4376							19	15	15	58.9	52.6	52.6	56.14	0	108.91	7840200000	26	78	301550000	1.01906	0.263426	-0.665104	-1.86071	Q42472	Q42472	Glutamate decarboxylase 2	GAD2	2000	sp|Q42472|DCE2_ARATH Glutamate decarboxylase 2 OS=Arabidopsis thaliana OX=3702 GN=GAD2 PE=1 SV=1	AT1G65960
26.0882	25.3952	25.9606	26.6764	26.8327	27.09	26.066	26.5492	26.94	26.6678	26.4945	26.2404					+	AP1_WT_ELUATE_AP1_WT_INPUT	16	16	16	40.5	40.5	40.5	59.336	0	213.34	7831300000	25	105	313250000	2.88161	0.00728268	-0.751876	-4.41051	Q42479	Q42479	Calcium-dependent protein kinase 3	CPK3	2001	sp|Q42479|CDPK3_ARATH Calcium-dependent protein kinase 3 OS=Arabidopsis thaliana OX=3702 GN=CPK3 PE=1 SV=1	AT4G23650
26.233	25.9925	NaN	27.068	27.0098	27.2231	25.4419	27.458	27.1439	27.5867	27.0859	27.244							36	36	33	35.4	35.4	33.3	162.62	0	227.04	14179000000	70	275	202560000	1.56385	0.0904648	-0.848808	-2.63133	Q42510	Q42510	ARF guanine-nucleotide exchange factor GNOM	GN	2002	sp|Q42510|GNOM_ARATH ARF guanine-nucleotide exchange factor GNOM OS=Arabidopsis thaliana OX=3702 GN=GN PE=1 SV=1	AT1G13980
NaN	NaN	NaN	25.7389	25.4031	26.0813	24.0953	25.0135	25.9902	25.3416	26.0736	25.808							13	13	5	47.5	47.5	20.1	50.141	0	98.68	4031100000	19	67	212160000	0.230159	1	-0.269158	-0.566685	Q42522	Q42522	Glutamate-1-semialdehyde 2,1-aminomutase 2, chloroplastic	GSA2	2003	sp|Q42522|GSA2_ARATH Glutamate-1-semialdehyde 2,1-aminomutase 2, chloroplastic OS=Arabidopsis thaliana OX=3702 GN=GSA2 PE=1 SV=2	AT3G48730
26.8862	27.8324	28.1942	28.6119	29.359	29.0831	28.1378	28.9974	29.0196	28.6588	27.6337	27.6963					+	AP1_WT_ELUATE_AP1_WT_INPUT	23	23	18	68.8	68.8	58.9	53.706	0	323.31	36428000000	22	313	1655800000	3.56216	0.00214735	-1.22485	-5.46741	Q42525	Q42525	Hexokinase-1	HXK1	2004	sp|Q42525|HXK1_ARATH Hexokinase-1 OS=Arabidopsis thaliana OX=3702 GN=HXK1 PE=1 SV=2	AT4G29130
27.6737	27.0746	28.0633	29.1204	28.5004	28.7097	28.0445	28.6681	28.9209	29.1733	28.1097	28.5356					+	AP1_WT_ELUATE_AP1_WT_INPUT	22	22	17	56.5	56.5	43.3	56.695	0	323.31	39030000000	25	442	1561200000	2.63781	0.011573	-0.931907	-4.05569	Q42547	Q42547	Catalase-3	CAT3	2009	sp|Q42547|CATA3_ARATH Catalase-3 OS=Arabidopsis thaliana OX=3702 GN=CAT3 PE=1 SV=3	AT1G20620
NaN	24.6753	NaN	26.7242	27.7838	27.4975	NaN	27.7929	28.0863	27.8226	27.3521	26.7391							24	24	17	37.3	37.3	27.2	98.151	0	157.32	13208000000	42	169	314470000	1.23715	0.172942	-1.36239	-2.26477	Q42560	Q42560	Aconitate hydratase 1	ACO1	2012	sp|Q42560|ACO1_ARATH Aconitate hydratase 1 OS=Arabidopsis thaliana OX=3702 GN=ACO1 PE=1 SV=2	AT4G35830
NaN	NaN	NaN	29.0555	28.9604	29.5317	NaN	29.6286	29.9684	28.7965	25.6661	24.2945					+	AP1_WT_ELUATE_AP1_WT_INPUT	20	20	20	50.9	50.9	50.9	31.571	0	277.56	39027000000	18	177	2168200000	4.05094	0.000892233	-4.34326	-9.27285	Q42564;Q7XZP5	Q42564	L-ascorbate peroxidase 3, peroxisomal	APX3	2014	sp|Q42564|APX3_ARATH L-ascorbate peroxidase 3 OS=Arabidopsis thaliana OX=3702 GN=APX3 PE=1 SV=1	AT4G35000
NaN	26.099	NaN	27.4772	27.3145	27.1104	26.2758	26.6583	27.3366	26.8593	26.8073	26.3958					+	AP1_WT_ELUATE_AP1_WT_INPUT	11	11	11	47.2	47.2	47.2	24.044	0	84.143	13814000000	11	106	1255800000	2.19648	0.0266648	-0.731544	-3.66438	Q42577	Q42577	NADH dehydrogenase [ubiquinone] iron-sulfur protein 7, mitochondrial		2017	sp|Q42577|NDUS7_ARATH NADH dehydrogenase [ubiquinone] iron-sulfur protein 7, mitochondrial OS=Arabidopsis thaliana OX=3702 GN=At5g11770 PE=1 SV=1	AT5G11770
NaN	NaN	25.4648	25.3524	25.2695	25.4982	NaN	25.508	25.592	25.7034	24.715	NaN							14	9	3	49	41.8	14	43.332	0	103.84	4529100000	19	55	238370000	0.957814	0.297656	-0.39735	-1.87312	Q42583	Q42583	Ribose-phosphate pyrophosphokinase 2, chloroplastic	PRS2	2019	sp|Q42583|KPRS2_ARATH Ribose-phosphate pyrophosphokinase 2, chloroplastic OS=Arabidopsis thaliana OX=3702 GN=PRS2 PE=2 SV=2	AT1G32380
24.1957	23.9976	NaN	25.0234	25.0355	25.1063	NaN	25.2575	24.9237	25.3286	25.9266	25.6617							10	10	9	33.4	33.4	31.3	51.85	0	200.14	3573700000	23	92	155380000	0.163548	1	-0.167113	-0.419055	Q42586	Q42586	Uridine 5-monophosphate synthase;Orotate phosphoribosyltransferase;Orotidine 5-phosphate decarboxylase	PYRE-F	2020	sp|Q42586|UMPS_ARATH Uridine 5-monophosphate synthase OS=Arabidopsis thaliana OX=3702 GN=PYRE-F PE=2 SV=2	AT3G54470
NaN	NaN	NaN	28.2041	27.5019	27.0162	25.1533	27.2777	27.7708	27.0763	25.9113	25.1411					+	AP1_WT_ELUATE_AP1_WT_INPUT	12	12	3	43.7	43.7	10.8	25.502	0	51.952	13578000000	13	115	1044400000	3.48162	0.0024651	-2.07258	-6.51358	Q42599	Q42599	NADH dehydrogenase [ubiquinone] iron-sulfur protein 8-A, mitochondrial		2023	sp|Q42599|NDS8A_ARATH NADH dehydrogenase [ubiquinone] iron-sulfur protein 8-A, mitochondrial OS=Arabidopsis thaliana OX=3702 GN=At1g79010 PE=1 SV=1	AT1G79010
NaN	24.9806	NaN	26.7675	26.796	27.027	26.4561	26.8334	26.3402	26.7107	26.5265	25.3698							28	28	28	32.9	32.9	32.9	129.96	0	78.319	8893400000	63	114	141170000	1.62251	0.0814531	-0.912542	-2.78203	Q42601	Q42601	Carbamoyl-phosphate synthase large chain, chloroplastic	CARB	2025	sp|Q42601|CARB_ARATH Carbamoyl-phosphate synthase large chain, chloroplastic OS=Arabidopsis thaliana OX=3702 GN=CARB PE=1 SV=1	AT1G29900
25.7374	25.2816	NaN	26.6129	26.3678	26.3675	25.8552	26.2783	26.2089	26.6439	27.0671	26.827							17	17	14	58.1	58.1	54.7	47.41	0	323.31	9419400000	19	148	495760000	0.362357	0.979006	-0.25956	-0.8186	Q43127	Q43127	Glutamine synthetase, chloroplastic/mitochondrial	GLN2	2027	sp|Q43127|GLNA2_ARATH Glutamine synthetase, chloroplastic/mitochondrial OS=Arabidopsis thaliana OX=3702 GN=GLN2 PE=1 SV=1	AT5G35630
30.8736	30.7269	30.287	28.6489	27.697	27.4662	30.537	28.4411	28.7179	28.6911	31.2903	30.541					+	AP1_WT_ELUATE_AP1_WT_INPUT	14	14	14	51.2	51.2	51.2	18.709	0	148.17	79015000000	8	340	9876800000	5.44217	0.000101479	2.43225	9.13674	Q9FDZ9;Q43291	Q9FDZ9;Q43291	60S ribosomal protein L21-2;60S ribosomal protein L21-1	RPL21E;RPL21A	2028	sp|Q9FDZ9|RL212_ARATH 60S ribosomal protein L21-2 OS=Arabidopsis thaliana OX=3702 GN=RPL21F PE=2 SV=1;sp|Q43291|RL211_ARATH 60S ribosomal protein L21-1 OS=Arabidopsis thaliana OX=3702 GN=RPL21C PE=2 SV=2	AT1G09590;AT1G57660
30.639	31.1245	29.8808	28.1433	28.556	28.9961	28.5706	28.7478	28.1829	28.7341	30.222	29.1438					+	AP1_WT_ELUATE_AP1_WT_INPUT	5	5	5	45.3	45.3	45.3	10.84	0	33.268	62463000000	4	118	15616000000	2.12386	0.0308999	1.3701	3.33778	Q43292;Q8LEM8;Q8LFH7	Q43292;Q8LEM8;Q8LFH7	60S ribosomal protein L37-2;60S ribosomal protein L37-3;60S ribosomal protein L37-1	RPL37B;RPL37C;RPL37A	2029	sp|Q43292|RL372_ARATH 60S ribosomal protein L37-2 OS=Arabidopsis thaliana OX=3702 GN=RPL37B PE=3 SV=2;sp|Q8LEM8|RL373_ARATH 60S ribosomal protein L37-3 OS=Arabidopsis thaliana OX=3702 GN=RPL37C PE=3 SV=1;sp|Q8LFH7|RL371_ARATH 60S ribosomal protein L37-1 OS	AT1G15250;AT1G52300;AT3G16080
27.076	27.3042	NaN	21.0882	23.0126	21.9445	27.7515	22.04	24.6107	22.9339	26.6113	26.8867					+	AP1_WT_ELUATE_AP1_WT_INPUT	2	2	2	13.8	13.8	13.8	30.043	0	6.1975	3409400000	14	21	243530000	4.59795	0.000381938	4.52095	7.86947	Q4PL95	Q4PL95		At2g40316	2043	tr|Q4PL95|Q4PL95_ARATH Autophagy-like protein OS=Arabidopsis thaliana OX=3702 GN=At2g40313 PE=1 SV=1	AT2G40316
NaN	NaN	NaN	23.1958	23.3332	23.3992	NaN	24.0582	23.4174	23.955	23.5518	23.8002							5	5	4	14.5	14.5	12.7	53.491	0	22.043	1097200000	20	36	54859000	0.164888	1	0.116174	0.427275	Q4V3C7	Q4V3C7	DUF21 domain-containing protein At4g14230	CBSDUF2	2049	sp|Q4V3C7|Y4423_ARATH DUF21 domain-containing protein At4g14230 OS=Arabidopsis thaliana OX=3702 GN=CBSDUF2 PE=2 SV=1	AT4G14230
24.9794	NaN	NaN	24.9317	24.3853	24.0315	24.9396	25.3487	24.9921	25.5237	25.5727	25.1084							16	15	12	46.2	43.5	35.1	54.19	0	152.32	3375900000	29	97	116410000	0.404971	0.900586	0.281153	0.901653	Q4V3C9	Q4V3C9	3-ketoacyl-CoA synthase 8	KCS8	2051	sp|Q4V3C9|KCS8_ARATH 3-ketoacyl-CoA synthase 8 OS=Arabidopsis thaliana OX=3702 GN=KCS8 PE=2 SV=1	AT2G15090
26.2012	25.8797	25.6246	31.3348	30.6905	30.8199	27.7742	30.3867	30.4926	31.0159	29.9962	28.2842					+	AP1_WT_ELUATE_AP1_WT_INPUT	25	25	25	62.2	62.2	62.2	51.391	0	323.31	179390000000	16	705	11212000000	3.22357	0.00389619	-3.49673	-4.9281	Q4V3D1	Q4V3D1		HON5	2052	tr|Q4V3D1|Q4V3D1_ARATH At1g48620 OS=Arabidopsis thaliana OX=3702 GN=HON5 PE=1 SV=1	AT1G48620
NaN	NaN	NaN	25.37	25.155	25.8972	NaN	25.3279	25.9022	25.1031	24.9123	24.7919							3	3	3	17.4	17.4	17.4	19.218	0	33.03	3370600000	8	25	421320000	1.20029	0.185101	-0.607147	-2.27705	Q53YF3	Q53YF3	Signal peptidase complex subunit 3B		2066	sp|Q53YF3|SPC3B_ARATH Signal peptidase complex subunit 3B OS=Arabidopsis thaliana OX=3702 GN=At5g27430 PE=2 SV=1	AT5G27430
NaN	23.9455	NaN	27.1869	29.4054	28.3349	NaN	29.0432	28.2748	28.0936	26.3144	24.1423					+	AP1_WT_ELUATE_AP1_WT_INPUT	18	18	16	66.5	66.5	60.6	48.578	0	323.31	19901000000	23	192	865260000	2.94069	0.00654687	-3.58907	-5.28138	Q56WD9	Q56WD9	3-ketoacyl-CoA thiolase 2, peroxisomal	PED1	2069	sp|Q56WD9|THIK2_ARATH 3-ketoacyl-CoA thiolase 2, peroxisomal OS=Arabidopsis thaliana OX=3702 GN=PED1 PE=1 SV=2	AT2G33150
29.1511	28.5029	27.1973	30.9191	31.1343	30.8741	28.5904	31.2511	30.7367	31.4084	28.6734	28.9645					+	AP1_WT_ELUATE_AP1_WT_INPUT	17	17	17	43.8	43.8	43.8	32.348	0	323.31	262070000000	15	434	17471000000	5.15013	0.000162122	-2.54069	-8.47536	Q56WH4	Q56WH4	Histone deacetylase HDT2	HDT2	2071	sp|Q56WH4|HDT2_ARATH Histone deacetylase HDT2 OS=Arabidopsis thaliana OX=3702 GN=HDT2 PE=1 SV=2	AT5G22650
24.763	NaN	NaN	26.1093	26.3372	26.5498	NaN	26.0451	26.8829	25.9528	26.6572	25.9825							18	18	15	38.7	38.7	32.6	64.046	0	56.622	5698000000	33	68	172670000	0.58134	0.62992	-0.511929	-1.2193	Q56WK6	Q56WK6	Patellin-1	PATL1	2072	sp|Q56WK6|PATL1_ARATH Patellin-1 OS=Arabidopsis thaliana OX=3702 GN=PATL1 PE=1 SV=2	AT1G72150
NaN	NaN	NaN	24.5367	24.6297	24.913	NaN	24.6486	24.0523	24.6173	25.1737	24.9014							12	4	3	43.5	23.3	19.4	39.115	0	79.494	2423100000	14	53	173080000	1.11939	0.216187	0.471258	2.14177	Q56WN1	Q56WN1	Glutamine synthetase cytosolic isozyme 1-1	GLN1-1	2073	sp|Q56WN1|GLN11_ARATH Glutamine synthetase cytosolic isozyme 1-1 OS=Arabidopsis thaliana OX=3702 GN=GLN1-1 PE=1 SV=2	AT5G37600
25.5839	25.2264	NaN	23.4735	21.9489	22.4721	25.4299	23.9407	23.9229	23.6933	24.6869	25.5244					+	AP1_WT_ELUATE_AP1_WT_INPUT	11	11	11	29.3	29.3	29.3	68.923	0	41.497	1518000000	33	62	46001000	3.17428	0.00421373	2.04842	5.07266	Q56X76	Q56X76	DEAD-box ATP-dependent RNA helicase 39	RH39	2075	sp|Q56X76|RH39_ARATH DEAD-box ATP-dependent RNA helicase 39 OS=Arabidopsis thaliana OX=3702 GN=RH39 PE=2 SV=2	AT4G09730
27.4252	27.7328	NaN	27.0689	27.4057	27.71	26.0019	26.7329	27.1847	27.2572	27.5632	28.1029							21	21	21	71.2	71.2	71.2	48.337	0	323.31	24034000000	21	218	1144500000	0.150999	1	0.138643	0.389001	Q9LFN6;Q56XG6	Q9LFN6;Q56XG6	DEAD-box ATP-dependent RNA helicase 56;DEAD-box ATP-dependent RNA helicase 15	RH56;RH15	2077	sp|Q9LFN6|RH56_ARATH DEAD-box ATP-dependent RNA helicase 56 OS=Arabidopsis thaliana OX=3702 GN=RH56 PE=1 SV=2;sp|Q56XG6|RH15_ARATH DEAD-box ATP-dependent RNA helicase 15 OS=Arabidopsis thaliana OX=3702 GN=RH15 PE=1 SV=3	AT5G11170;AT5G11200
24.5956	25.0753	NaN	26.6371	26.373	26.9658	24.2232	25.4236	25.1071	25.7603	25.8671	25.3904							12	12	12	41.6	41.6	41.6	44.207	0	70.999	4776400000	21	76	227450000	1.41046	0.122769	-1.01416	-2.41602	Q56YA5	Q56YA5	Serine--glyoxylate aminotransferase	AGT1	2083	sp|Q56YA5|SGAT_ARATH Serine--glyoxylate aminotransferase OS=Arabidopsis thaliana OX=3702 GN=AGT1 PE=1 SV=2	AT2G13360
28.3567	28.4915	26.4195	28.2989	28.673	28.2992	28.6503	27.6702	27.6634	28.0489	27.7579	28.3764							58	58	58	52	52	52	139.37	0	323.31	39930000000	72	475	554580000	0.0990965	1	-0.100236	-0.265547	Q56YN8	Q56YN8	Structural maintenance of chromosomes protein 3	SMC3	2084	sp|Q56YN8|SMC3_ARATH Structural maintenance of chromosomes protein 3 OS=Arabidopsis thaliana OX=3702 GN=SMC3 PE=2 SV=1	AT2G27170
33.489	33.9925	34.0383	32.6625	32.6661	32.844	33.5238	32.4934	32.712	32.611	33.8219	33.722					+	AP1_WT_ELUATE_AP1_WT_INPUT	32	32	5	81.8	81.8	17.8	50.733	0	323.31	635700000000	21	2502	30271000000	5.97307	4.6674e-05	1.09975	10.4461	Q9ASR0;Q56YW9	Q9ASR0;Q56YW9	Tubulin beta-3 chain;Tubulin beta-2 chain	TUBB3;TUBB2	2085	sp|Q9ASR0|TBB3_ARATH Tubulin beta-3 chain OS=Arabidopsis thaliana OX=3702 GN=TUBB3 PE=2 SV=2;sp|Q56YW9|TBB2_ARATH Tubulin beta-2 chain OS=Arabidopsis thaliana OX=3702 GN=TUBB2 PE=2 SV=2	AT5G62690;AT5G62700
28.8153	28.9714	28.0581	29.8582	29.4804	29.5161	28.4732	29.637	29.5153	29.4194	28.5448	28.9603					+	AP1_WT_ELUATE_AP1_WT_INPUT	31	31	30	63.1	63.1	61.8	61.96	0	323.31	59770000000	29	508	2061000000	3.84138	0.00128984	-0.933871	-5.93514	Q570B4	Q570B4	3-ketoacyl-CoA synthase 10	FDH	2090	sp|Q570B4|KCS10_ARATH 3-ketoacyl-CoA synthase 10 OS=Arabidopsis thaliana OX=3702 GN=FDH PE=1 SV=2	AT2G26250
NaN	24.7617	NaN	25.045	25.1881	25.2859	NaN	25.5231	25.4943	25.6532	26.05	25.5982							14	13	12	42	39.8	37.9	47.955	0	53.526	3477500000	22	82	158070000	0.141814	1	0.104977	0.371273	Q570C8	Q570C8	3-ketoacyl-CoA thiolase 5, peroxisomal	KAT5	2091	sp|Q570C8|THIK5_ARATH 3-ketoacyl-CoA thiolase 5, peroxisomal OS=Arabidopsis thaliana OX=3702 GN=KAT5 PE=1 SV=2	AT5G48880
26.2194	26.3714	25.9917	27.0811	26.4889	26.4314	25.7229	26.5793	26.4066	26.6387	25.959	26.633							38	38	38	28.3	28.3	28.3	218.23	0	185.72	12254000000	99	159	123780000	1.6616	0.0750447	-0.454756	-2.71363	Q5D869	Q5D869	DNA-directed RNA polymerase V subunit 1	NRPE1	2093	sp|Q5D869|NRPE1_ARATH DNA-directed RNA polymerase V subunit 1 OS=Arabidopsis thaliana OX=3702 GN=NRPE1 PE=1 SV=1	AT2G40030
24.8709	24.3088	24.4682	24.3072	24.7295	24.6293	25.5596	22.02	23.0567	24.2728	25.0306	24.7033							10	10	10	29.3	29.3	29.3	60.141	0	71.806	2063000000	26	51	79347000	1.1954	0.18654	0.987672	2.08401	Q5E915	Q5E915	Protein RBL	RBL	2094	sp|Q5E915|RBBP_ARATH Protein RBL OS=Arabidopsis thaliana OX=3702 GN=RBL PE=1 SV=1	AT3G21060
26.5561	26.233	24.9796	29.0434	29.2415	29.161	25.8902	29.056	28.8491	29.1046	28.5031	28.0518					+	AP1_WT_ELUATE_AP1_WT_INPUT	54	54	33	68.8	68.8	49.4	109.75	0	323.31	44808000000	58	455	772550000	2.82592	0.00808353	-2.37361	-4.3285	Q5GM68	Q5GM68	Phosphoenolpyruvate carboxylase 2	PPC2	2097	sp|Q5GM68|CAPP2_ARATH Phosphoenolpyruvate carboxylase 2 OS=Arabidopsis thaliana OX=3702 GN=PPC2 PE=1 SV=2	AT2G42600
NaN	NaN	NaN	25.826	24.9763	25.2517	NaN	25.1206	25.0056	25.5181	25.3112	26.0936							19	19	19	23.1	23.1	23.1	158.91	0	56.21	3910300000	67	61	58363000	0.652802	0.545922	0.419349	1.36093	Q5S2C4	Q5S2C4	Protein NAP1	NAP1	2103	sp|Q5S2C4|NCKP1_ARATH Protein NAP1 OS=Arabidopsis thaliana OX=3702 GN=NAP1 PE=1 SV=2	AT2G35110
25.8675	25.567	NaN	24.7619	24.5737	24.2855	26.1747	25.3644	25.3597	25.148	25.7806	25.9822					+	AP1_WT_ELUATE_AP1_WT_INPUT	16	16	16	29.7	29.7	29.7	92.523	0	54.984	3997800000	37	76	108050000	2.72972	0.00965503	0.95886	4.34519	Q5W7F2	Q5W7F2	ADP-ribosylation factor GTPase-activating protein AGD3	AGD3	2104	sp|Q5W7F2|AGD3_ARATH ADP-ribosylation factor GTPase-activating protein AGD3 OS=Arabidopsis thaliana OX=3702 GN=AGD3 PE=1 SV=1	AT5G13300
NaN	NaN	NaN	20.5774	21.4287	22.4915	23.2068	22.8222	22.2416	22.6082	23.1536	23.2676							4	3	3	23.5	20.8	20.8	29.592	0	5.4466	321100000	8	6	40138000	1.25841	0.16634	1.181	2.29797	Q5XEM9	Q5XEM9	PHD finger protein ALFIN-LIKE 5;PHD finger protein ALFIN-LIKE 5, N-terminally processed	AL5	2105	sp|Q5XEM9|ALFL5_ARATH PHD finger protein ALFIN-LIKE 5 OS=Arabidopsis thaliana OX=3702 GN=AL5 PE=2 SV=1	AT5G20510
NaN	NaN	NaN	25.7452	26.0773	25.7021	25.4522	26.1329	24.9289	26.073	26.3625	NaN							10	10	10	39.7	39.7	39.7	37.455	0	220.3	6719700000	18	79	373320000	0.12196	1	0.130795	0.326463	Q5XEV4	Q5XEV4		At1g65030	2109	tr|Q5XEV4|Q5XEV4_ARATH At1g65030 OS=Arabidopsis thaliana OX=3702 GN=At1g65030 PE=1 SV=1	AT1G65030
NaN	NaN	NaN	24.8578	24.248	24.6474	25.0328	24.5763	24.1528	24.7898	24.1422	25.081							11	11	11	42.6	42.6	42.6	35.623	0	24.273	2622800000	21	38	124890000	0.33894	1	0.206656	0.784979	Q5XF12	Q5XF12		At1g65020	2113	tr|Q5XF12|Q5XF12_ARATH At1g65020 OS=Arabidopsis thaliana OX=3702 GN=At1g65020 PE=1 SV=1	AT1G65020
24.5373	24.775	NaN	21.8991	22.5526	21.6461	24.4803	22.1244	22.6429	24.0814	24.8042	24.543					+	AP1_WT_ELUATE_AP1_WT_INPUT	7	7	7	21.4	21.4	21.4	46.562	0	32.953	1019000000	22	43	46320000	3.36306	0.0030312	2.13687	5.39921	Q66GM8;Q9SFF6	Q66GM8	Pectin acetylesterase 10	PAE10	2121	sp|Q66GM8|PAE10_ARATH Pectin acetylesterase 10 OS=Arabidopsis thaliana OX=3702 GN=PAE10 PE=2 SV=1	AT5G26670
25.0303	25.0455	NaN	20.884	22.625	22.3782	24.6518	23.3597	22.6055	22.4329	23.6491	24.1392					+	AP1_WT_ELUATE_AP1_WT_INPUT	11	11	11	18.6	18.6	18.6	90.006	0	13.594	940650000	30	28	31355000	3.02098	0.00562581	2.12231	4.81556	Q67Z79	Q67Z79		At5g17930	2139	tr|Q67Z79|Q67Z79_ARATH MIF4G domain-containing protein / MA3 domain-containing protein OS=Arabidopsis thaliana OX=3702 GN=MCM23.1 PE=1 SV=1	AT5G17930
NaN	NaN	NaN	26.3678	25.1561	25.3143	NaN	25.4966	24.9313	25.8265	26.2275	25.8918							13	13	13	55.2	55.2	55.2	37.56	0	33.955	5202500000	19	58	273810000	0.666494	0.531782	0.544217	1.38438	Q680A5	Q680A5	Ribose-phosphate pyrophosphokinase 4	PRS4	2142	sp|Q680A5|KPRS4_ARATH Ribose-phosphate pyrophosphokinase 4 OS=Arabidopsis thaliana OX=3702 GN=PRS4 PE=1 SV=2	AT2G42910
28.6795	27.1401	27.3909	26.8135	25.5132	25.5661	NaN	26.1011	28.3094	26.1328	28.374	27.4105							4	4	4	51.8	51.8	51.8	6.4294	0	47.792	11072000000	3	69	3690800000	1.50692	0.100862	1.39301	2.55141	Q680P8;A0A1P8B616	Q680P8	40S ribosomal protein S29	RPS29A	2144	sp|Q680P8|RS29_ARATH 40S ribosomal protein S29 OS=Arabidopsis thaliana OX=3702 GN=RPS29C PE=3 SV=2	AT3G43980
23.9379	23.8899	NaN	21.7847	21.841	22.9055	24.6818	22.1182	21.9682	22.5819	24.4025	24.0304					+	AP1_WT_ELUATE_AP1_WT_INPUT	8	8	8	14.8	14.8	14.8	97.033	0	21.436	602580000	42	22	14347000	4.70721	0.000327743	1.98856	8.12127	Q680Q4	Q680Q4	E3 SUMO-protein ligase SIZ1	SIZ1	2145	sp|Q680Q4|SIZ1_ARATH E3 SUMO-protein ligase SIZ1 OS=Arabidopsis thaliana OX=3702 GN=SIZ1 PE=1 SV=2	AT5G60410
26.107	26.1745	NaN	25.5757	26.4789	26.0533	25.3382	25.5588	25.4525	25.4191	26.8925	26.4892							5	5	5	25.1	25.1	25.1	19.949	0	7.9062	4321600000	13	52	332430000	0.763024	0.441925	0.443896	1.48165	Q681K2	Q681K2			2147	sp|Q681K2|ATS3A_ARATH Embryo-specific protein ATS3A OS=Arabidopsis thaliana OX=3702 GN=ATS3A PE=1 SV=1	AT2G41475
26.9402	26.9231	26.9839	26.8959	26.5494	26.6528	26.9755	27.0899	26.4525	26.8675	27.3666	26.967							14	14	14	70.9	70.9	70.9	21.767	0	72.818	13137000000	12	122	1094700000	1.349	0.138203	0.274725	2.29318	Q683D4	Q683D4		At5g15750	2150	tr|Q683D4|Q683D4_ARATH Alpha-L RNA-binding motif/Ribosomal protein S4 family protein OS=Arabidopsis thaliana OX=3702 GN=At5g15750 PE=1 SV=1	AT5G15750
24.4018	24.8089	NaN	21.7396	21.3746	22.9886	24.3546	23.3806	22.2063	22.4164	24.2049	24.4336				C2H2	+	AP1_WT_ELUATE_AP1_WT_INPUT	8	8	8	8.9	8.9	8.9	150.07	0	15.789	528990000	61	18	8672000	3.67146	0.00173701	2.08974	5.95856	Q6BDA0	Q6BDA0	Probable lysine-specific demethylase ELF6	ELF6	2157	sp|Q6BDA0|ELF6_ARATH Probable lysine-specific demethylase ELF6 OS=Arabidopsis thaliana OX=3702 GN=ELF6 PE=1 SV=1	AT5G04240
25.9418	25.6482	24.8595	24.8875	24.5791	24.5962	25.3967	25.4496	24.3873	24.9568	24.9679	25.2995							11	11	11	37.8	37.8	37.8	50.782	0	42.348	2426700000	24	43	101110000	1.42244	0.119882	0.542866	2.39235	Q6DBG8	Q6DBG8	Probable arabinosyltransferase ARAD1	ARAD1	2160	sp|Q6DBG8|ARAD1_ARATH Probable arabinosyltransferase ARAD1 OS=Arabidopsis thaliana OX=3702 GN=ARAD1 PE=1 SV=1	AT2G35100
NaN	NaN	NaN	21.8974	22.1312	21.1848	26.4659	22.4431	22.3849	22.6915	NaN	26.3675					+	AP1_WT_ELUATE_AP1_WT_INPUT	9	9	9	27.8	27.8	27.8	39.371	0	39.842	1023600000	18	12	56866000	4.42216	0.000490976	4.29458	10.7727	Q6DBN5	Q6DBN5	U-box domain-containing protein 62	PUB62	2163	sp|Q6DBN5|PUB62_ARATH U-box domain-containing protein 62 OS=Arabidopsis thaliana OX=3702 GN=PUB62 PE=2 SV=1	AT5G05230
NaN	NaN	NaN	20.256	21.4514	21.8683	NaN	23.2771	22.1887	22.1567	23.6192	23.1894							7	7	7	14.3	14.3	14.3	82.754	0	28.061	421490000	41	31	10280000	1.06784	0.239584	1.53791	2.05593	Q6E7H0	Q6E7H0	Origin of replication complex subunit 3	ORC3	2167	sp|Q6E7H0|ORC3_ARATH Origin of replication complex subunit 3 OS=Arabidopsis thaliana OX=3702 GN=ORC3 PE=1 SV=1	AT5G16690
28.3526	28.2955	26.9384	25.4402	25.1441	25.9912	29.302	26.0864	25.1752	26.377	27.4061	28.6518					+	AP1_WT_ELUATE_AP1_WT_INPUT	52	52	51	31.6	31.6	31	245.47	0	323.31	13483000000	107	223	126010000	3.88517	0.00120813	2.4554	6.01054	Q6EVK6	Q6EVK6	ATP-dependent helicase BRM	BRM	2168	sp|Q6EVK6|BRM_ARATH ATP-dependent helicase BRM OS=Arabidopsis thaliana OX=3702 GN=BRM PE=1 SV=1	AT2G46020
26.4169	26.6729	26.4185	26.2547	26.0604	26.2084	26.7701	26.4993	26.2354	26.3798	26.9008	26.6784					+	AP1_WT_ELUATE_AP1_WT_INPUT	18	18	18	40.2	40.2	40.2	60.235	0	110.64	9287900000	25	136	371520000	2.38566	0.0186271	0.369939	3.69909	Q6GKU7	Q6GKU7		At1g64880	2170	tr|Q6GKU7|Q6GKU7_ARATH At1g64880 OS=Arabidopsis thaliana OX=3702 GN=At1g64880 PE=1 SV=1	AT1G64880
26.5684	26.2591	26.8833	27.1981	27.1347	27.1834	26.5247	27.1207	26.4558	26.9119	26.6792	26.2869					+	AP1_WT_ELUATE_AP1_WT_INPUT	11	11	11	73.3	73.3	73.3	20.61	0	156.91	14515000000	9	139	1612800000	1.9334	0.0445468	-0.467141	-3.07916	Q6NM52	Q6NM52	60S ribosome subunit biogenesis protein NIP7 homolog	At4g15770	2194	tr|Q6NM52|Q6NM52_ARATH 60S ribosome subunit biogenesis protein NIP7 homolog OS=Arabidopsis thaliana OX=3702 GN=At4g15770 PE=1 SV=1	AT4G15770
27.322	26.8115	26.8309	24.9165	24.818	25.7586	27.1191	24.5449	24.7487	24.9409	26.0011	26.6717				CAMTA	+	AP1_WT_ELUATE_AP1_WT_INPUT	20	20	18	23.8	23.8	22.2	117.26	0	261.41	3680100000	44	101	83638000	4.58025	0.000392161	1.83812	7.29103	Q6NPP4	Q6NPP4	Calmodulin-binding transcription activator 2	CMTA2	2203	sp|Q6NPP4|CMTA2_ARATH Calmodulin-binding transcription activator 2 OS=Arabidopsis thaliana OX=3702 GN=CAMTA2 PE=1 SV=1	AT5G64220
25.8433	25.4406	23.8638	21.1162	21.8011	22.9339	25.5917	24.2692	25.495	24.6912	NaN	NaN							11	11	10	42.4	42.4	39.2	30.435	0	273.39	6376200000	18	59	354240000	1.02816	0.258814	1.80043	1.9017	Q6NQ72	Q6NQ72	THO complex subunit 4D	ALY4	2207	sp|Q6NQ72|THO4D_ARATH THO complex subunit 4D OS=Arabidopsis thaliana OX=3702 GN=ALY4 PE=1 SV=1	AT5G37720
27.5746	28.0752	26.7714	27.8182	27.1469	27.2405	28.433	27.0859	26.1422	27.0946	27.0909	27.8047							34	34	34	57.7	57.7	57.7	82.567	0	235.97	18613000000	38	284	489810000	0.85501	0.367679	0.536955	1.60473	Q6NQ79	Q6NQ79	AT-rich interactive domain-containing protein 4	ARID4	2208	sp|Q6NQ79|ARID4_ARATH AT-rich interactive domain-containing protein 4 OS=Arabidopsis thaliana OX=3702 GN=ARID4 PE=1 SV=1	AT3G43240
26.1744	25.5394	25.7302	24.5085	24.7455	21.6701	26.0624	21.6282	23.402	22.6619	25.2887	25.9857				FAR1	+	AP1_WT_ELUATE_AP1_WT_INPUT	17	15	15	27.3	25.3	25.3	85.15	0	32.808	1628500000	36	57	45237000	3.08979	0.00495503	2.6941	4.7226	Q6NQJ7	Q6NQJ7	Protein FAR1-RELATED SEQUENCE 4	FRS4	2213	sp|Q6NQJ7|FRS4_ARATH Protein FAR1-RELATED SEQUENCE 4 OS=Arabidopsis thaliana OX=3702 GN=FRS4 PE=2 SV=2	AT1G76320
28.2221	28.3366	27.9054	28.0091	28.8088	28.3476	28.3721	28.0083	27.8541	28.1426	27.7759	28.3712							59	59	59	52.1	52.1	52.1	140.91	0	323.31	40467000000	63	429	642330000	0.064201	1	-0.0311934	-0.177605	Q6Q1P4	Q6Q1P4	Structural maintenance of chromosomes protein 1	SMC1	2217	sp|Q6Q1P4|SMC1_ARATH Structural maintenance of chromosomes protein 1 OS=Arabidopsis thaliana OX=3702 GN=SMC1 PE=2 SV=2	AT3G54670
26.409	25.8062	24.7605	24.4558	24.2364	24.0257	26.1917	25.1931	24.3647	25.3339	25.3813	25.8978					+	AP1_WT_ELUATE_AP1_WT_INPUT	14	14	14	31.1	31.1	31.1	74.413	0	79.464	3849100000	26	127	148040000	2.23504	0.0248465	1.13946	3.49026	Q6S7B0	Q6S7B0	Transcription initiation factor TFIID subunit 5	TAF5	2225	sp|Q6S7B0|TAF5_ARATH Transcription initiation factor TFIID subunit 5 OS=Arabidopsis thaliana OX=3702 GN=TAF5 PE=1 SV=1	AT5G25150
27.8073	27.4599	25.6834	27.1091	26.8328	26.5484	27.6176	27.2844	27.1573	27.2526	27.3179	27.4383							43	43	43	35.1	35.1	35.1	202.93	0	323.31	13598000000	86	370	158110000	0.233384	1	0.189959	0.565384	Q6WWW4	Q6WWW4	E3 ubiquitin-protein ligase UPL3	UPL3	2228	sp|Q6WWW4|UPL3_ARATH E3 ubiquitin-protein ligase UPL3 OS=Arabidopsis thaliana OX=3702 GN=UPL3 PE=1 SV=1	AT4G38600
26.5399	26.4283	27.4785	26.2603	26.7027	26.3357	25.9868	26.3365	25.8608	26.4422	26.8902	25.9567							39	21	21	57.9	38.7	38.7	97.953	0	97.843	9246700000	53	122	174470000	0.38634	0.933295	0.223711	0.858298	Q6XJG8	Q6XJG8	26S proteasome non-ATPase regulatory subunit 2 homolog B	RPN1B	2230	sp|Q6XJG8|PSD2B_ARATH 26S proteasome non-ATPase regulatory subunit 2 homolog B OS=Arabidopsis thaliana OX=3702 GN=RPN1B PE=1 SV=1	AT4G28470
NaN	NaN	NaN	22.3595	21.924	22.2127	NaN	22.8768	22.984	22.659	23.8567	24.6937				Trihelix	+	AP1_WT_ELUATE_AP1_WT_INPUT	3	2	2	6.9	5	5	55.502	0	15.718	198770000	17	11	11692000	2.55949	0.0134097	1.77256	4.88315	Q700D8	Q700D8		EDA31	2232	tr|Q700D8|Q700D8_ARATH At3g10000 OS=Arabidopsis thaliana OX=3702 GN=EDA31 PE=2 SV=1	AT3G10000
NaN	NaN	NaN	22.6115	21.5527	21.4551	23.985	21.939	22.6922	22.3537	NaN	23.7876				bHLH	+	AP1_WT_ELUATE_AP1_WT_INPUT	2	2	2	7.5	7.5	7.5	41.03	0.00040478	3.4627	259310000	18	7	14406000	2.37199	0.0190789	1.7856	4.46804	Q700E4	Q700E4	Transcription factor bHLH67	BHLH67	2233	sp|Q700E4|BH067_ARATH Transcription factor bHLH67 OS=Arabidopsis thaliana OX=3702 GN=BHLH67 PE=2 SV=1	AT3G61950
25.8843	25.4187	24.0458	25.0051	24.3611	24.5996	26.4524	24.8979	24.8604	22.073	25.1081	26.1835				SBP			8	7	7	26.9	25.1	25.1	40.846	0	23.811	2857900000	14	50	204130000	1.2102	0.181558	1.21595	2.10429	Q700W2	Q700W2	Squamosa promoter-binding-like protein 9	SPL9	2234	sp|Q700W2|SPL9_ARATH Squamosa promoter-binding-like protein 9 OS=Arabidopsis thaliana OX=3702 GN=SPL9 PE=2 SV=2	AT2G42200
NaN	NaN	NaN	26.3987	26.4278	26.7516	24.932	26.422	26.7325	26.3688	25.4123	25.0621					+	AP1_WT_ELUATE_AP1_WT_INPUT	12	12	12	28.1	28.1	28.1	53.158	0	76.553	6359200000	19	96	334690000	4.61386	0.00037281	-1.38146	-9.80663	Q70DU8	Q70DU8	Aldehyde dehydrogenase family 3 member H1	ALDH3H1	2235	sp|Q70DU8|AL3H1_ARATH Aldehyde dehydrogenase family 3 member H1 OS=Arabidopsis thaliana OX=3702 GN=ALDH3H1 PE=1 SV=2	AT1G44170
27.6215	27.1056	25.9308	29.1413	28.9047	29.1495	27.3388	28.3585	28.8875	28.5033	28.0435	27.9717					+	AP1_WT_ELUATE_AP1_WT_INPUT	26	26	26	53.7	53.7	53.7	53.615	0	151.96	31449000000	25	208	1258000000	2.82532	0.00808353	-1.48882	-4.32761	Q70E96	Q70E96	Aldehyde dehydrogenase family 3 member F1	ALDH3F1	2236	sp|Q70E96|AL3F1_ARATH Aldehyde dehydrogenase family 3 member F1 OS=Arabidopsis thaliana OX=3702 GN=ALDH3F1 PE=2 SV=2	AT4G36250
27.6986	27.1054	26.1145	27.6802	27.6329	27.3547	27.5009	27.4785	27.5474	27.2607	27.5486	27.474							36	36	36	28.5	28.5	28.5	187.92	0	323.31	16372000000	91	209	179920000	0.477284	0.780777	-0.252092	-1.01682	Q76E23	Q76E23	Eukaryotic translation initiation factor 4G	EIF4G	2238	sp|Q76E23|IF4G_ARATH Eukaryotic translation initiation factor 4G OS=Arabidopsis thaliana OX=3702 GN=EIF4G PE=1 SV=2	AT3G60240
25.5328	NaN	NaN	26.8163	27.1728	26.6105	25.6519	26.4838	25.9521	26.6491	26.0365	25.6065					+	AP1_WT_ELUATE_AP1_WT_INPUT	8	8	8	50.4	50.4	50.4	27.651	0	323.31	8697600000	12	98	724800000	2.43575	0.0169364	-0.90716	-4.05347	Q7DLR9	Q7DLR9	Proteasome subunit beta type-4	PBG1	2239	sp|Q7DLR9|PSB4_ARATH Proteasome subunit beta type-4 OS=Arabidopsis thaliana OX=3702 GN=PBG1 PE=1 SV=2	AT1G56450
NaN	NaN	NaN	26.8115	26.5283	26.8709	NaN	27.155	26.6378	26.8265	25.6236	24.4747					+	AP1_WT_ELUATE_AP1_WT_INPUT	25	24	21	22.5	21.9	19.2	168.57	0	188.1	7579000000	71	124	106750000	2.85092	0.00772389	-1.75585	-5.5777	Q7GB25	Q7GB25	ABC transporter C family member 5	ABCC5	2242	sp|Q7GB25|AB5C_ARATH ABC transporter C family member 5 OS=Arabidopsis thaliana OX=3702 GN=ABCC5 PE=2 SV=2	AT1G04120
NaN	NaN	NaN	24.6039	26.2747	25.9525	NaN	26.0793	25.3369	25.7412	24.9352	25.6299							14	10	9	32	24.8	23.3	67.625	0	33.042	4076400000	35	52	116470000	0.337623	1	-0.382215	-0.790008	Q7X911;Q94A27;Q7XZU2	Q7X911	Phosphoinositide phosphatase SAC6	SAC6	2250	sp|Q7X911|SAC6_ARATH Phosphoinositide phosphatase SAC6 OS=Arabidopsis thaliana OX=3702 GN=SAC6 PE=2 SV=1	AT5G66020
NaN	24.8012	NaN	24.2579	20.666	24.1359	NaN	21.4208	24.0109	24.1695	24.5182	25.1289							15	14	14	9.5	8.9	8.9	234.05	0	26.02	1879400000	97	35	19375000	0.907417	0.329819	1.70592	1.74907	Q7X9V2	Q7X9V2	Protein PHOTOPERIOD-INDEPENDENT EARLY FLOWERING 1	PIE1	2252	sp|Q7X9V2|PIE1_ARATH Protein PHOTOPERIOD-INDEPENDENT EARLY FLOWERING 1 OS=Arabidopsis thaliana OX=3702 GN=PIE1 PE=1 SV=1	AT3G12810
24.9227	24.8468	NaN	22.399	22.18	22.814	24.755	22.5078	22.3041	21.5488	26.2964	NaN					+	AP1_WT_ELUATE_AP1_WT_INPUT	5	5	5	29.8	29.8	29.8	23.38	0	11.215	1190200000	13	9	91552000	4.38993	0.000520737	2.91295	8.07731	Q7XA68	Q7XA68		At3g01790	2253	tr|Q7XA68|Q7XA68_ARATH At1g01640 OS=Arabidopsis thaliana OX=3702 GN=At3g01790 PE=1 SV=1	AT1G01640
23.9066	25.0983	NaN	24.5612	24.4287	24.2395	24.8941	24.1589	22.7361	24.2911	24.3151	24.4947							13	13	13	27.3	27.3	27.3	68.213	0	83.48	2342200000	32	58	73192000	0.661271	0.537266	0.472476	1.32402	Q7XJN0	Q7XJN0	DEAD-box ATP-dependent RNA helicase 17	RH17	2258	sp|Q7XJN0|RH17_ARATH DEAD-box ATP-dependent RNA helicase 17 OS=Arabidopsis thaliana OX=3702 GN=RH17 PE=2 SV=1	AT2G40700
28.8129	28.0732	27.8126	28.8567	28.42	28.5371	28.8004	28.4911	28.4186	28.23	27.7514	28.6413							31	31	31	61.7	61.7	61.7	61.624	0	323.31	31803000000	27	328	1177900000	0.359614	0.98415	-0.176972	-0.809793	Q7Y1W1	Q7Y1W1	Protein TIC 56, chloroplastic	TIC56	2266	sp|Q7Y1W1|TIC56_ARATH Protein TIC 56, chloroplastic OS=Arabidopsis thaliana OX=3702 GN=TIC56 PE=1 SV=1	AT5G01590
NaN	NaN	23.9708	28.6491	27.5653	28.3277	NaN	27.6514	27.7596	27.9558	25.2331	24.7479					+	AP1_WT_ELUATE_AP1_WT_INPUT	16	16	16	47.2	47.2	47.2	55.61	0	196.2	23853000000	23	188	1037100000	4.53664	0.000414417	-3.33422	-9.54462	Q84JF5	Q84JF5		PTAC14	2273	sp|Q84JF5|PTA14_ARATH Protein PLASTID TRANSCRIPTIONALLY ACTIVE 14 OS=Arabidopsis thaliana OX=3702 GN=PTAC14 PE=1 SV=1	AT4G20130
28.0507	28.0321	28.0096	27.0291	26.5835	26.6119	29.2074	26.6869	26.519	26.5911	27.9084	28.4731					+	AP1_WT_ELUATE_AP1_WT_INPUT	28	28	28	64.2	64.2	64.2	52.41	0	253.58	13947000000	23	243	606410000	4.67295	0.000344928	1.60998	7.47479	Q84JG2	Q84JG2	SWI/SNF complex subunit SWI3B	SWI3B	2275	sp|Q84JG2|SWI3B_ARATH SWI/SNF complex subunit SWI3B OS=Arabidopsis thaliana OX=3702 GN=SWI3B PE=1 SV=1	AT2G33610
26.0912	24.9601	NaN	28.2539	27.9091	27.985	24.0595	28.0324	27.8926	28.3978	26.9052	27.0754					+	AP1_WT_ELUATE_AP1_WT_INPUT	30	30	30	46.5	46.5	46.5	105.23	0	323.31	29327000000	50	381	586540000	2.68269	0.0106021	-2.26018	-4.27128	Q84JU6	Q84JU6	E3 ubiquitin-protein ligase HOS1	HOS1	2282	sp|Q84JU6|HOS1_ARATH E3 ubiquitin-protein ligase HOS1 OS=Arabidopsis thaliana OX=3702 GN=HOS1 PE=1 SV=1	AT2G39810
NaN	NaN	NaN	27.1504	27.1088	27.2321	NaN	27.3009	27.7	26.7314	26.4341	25.4609					+	AP1_WT_ELUATE_AP1_WT_INPUT	9	9	7	42.9	42.9	29.4	25.512	0	23.157	9400100000	11	76	854550000	2.06601	0.0345243	-1.25644	-3.8369	Q84JW1	Q84JW1	Peroxisomal membrane protein 11E	PEX11E	2283	sp|Q84JW1|PX11E_ARATH Peroxisomal membrane protein 11E OS=Arabidopsis thaliana OX=3702 GN=PEX11E PE=1 SV=1	AT3G61070
NaN	25.4901	NaN	24.3135	24.7967	24.7552	24.7402	24.9722	24.7196	24.6137	24.4634	24.5534							8	8	8	49	49	49	29.201	0	50.661	2426000000	12	42	202160000	0.218852	1	0.116627	0.539613	Q84K90	Q84K90		At4g26410	2290	sp|Q84K90|RHIP1_ARATH RGS1-HXK1-interacting protein 1 OS=Arabidopsis thaliana OX=3702 GN=RHIP1 PE=1 SV=1	AT4G26410
29.3369	29.2139	29.8656	28.8257	29.0146	28.8826	30.2377	28.7792	28.7334	29.164	29.1654	29.1488					+	AP1_WT_ELUATE_AP1_WT_INPUT	30	30	30	81.6	81.6	81.6	48.936	0	323.31	56560000000	25	602	2262400000	1.9005	0.0473189	0.594819	3.03475	Q84M92;Q9C9B2	Q84M92	Actin-related protein 4	ARP4	2295	sp|Q84M92|ARP4_ARATH Actin-related protein 4 OS=Arabidopsis thaliana OX=3702 GN=ARP4 PE=1 SV=1	AT1G18450
27.6962	27.7045	27.314	25.866	25.3686	25.447	27.6917	26.068	24.712	26.0023	27.1731	27.2735					+	AP1_WT_ELUATE_AP1_WT_INPUT	20	20	20	44.4	44.4	44.4	60.915	0	118.41	8536800000	36	156	237130000	5.00813	0.000200017	1.89816	8.16765	Q84TG1	Q84TG1	DEAD-box ATP-dependent RNA helicase 57	RH57	2302	sp|Q84TG1|RH57_ARATH DEAD-box ATP-dependent RNA helicase 57 OS=Arabidopsis thaliana OX=3702 GN=RH57 PE=2 SV=1	AT3G09720
29.9924	29.6796	29.1023	24.6481	22.4315	23.722	29.914	23.3181	22.9359	23.0141	28.2134	30.1141					+	AP1_WT_ELUATE_AP1_WT_INPUT	35	35	35	39.7	39.7	39.7	130.73	0	319.19	13931000000	63	272	221130000	7.2475	8.78134e-06	6.15765	14.2662	Q84TI3	Q84TI3	Protein OBERON 4	OBE4	2306	sp|Q84TI3|OBE4_ARATH Protein OBERON 4 OS=Arabidopsis thaliana OX=3702 GN=OBE4 PE=1 SV=2	AT3G63500
24.518	24.9231	24.9865	23.0008	22.4257	22.8749	25.7352	22.4002	21.4459	22.8466	24.2232	NaN					+	AP1_WT_ELUATE_AP1_WT_INPUT	5	5	5	16.4	16.4	16.4	52.797	0	10.134	1041900000	30	9	34731000	4.13423	0.000775185	2.37818	6.86591	Q84TI6	Q84TI6	Cyclin-dependent kinase E-1	CDKE-1	2307	sp|Q84TI6|CDKE1_ARATH Cyclin-dependent kinase E-1 OS=Arabidopsis thaliana OX=3702 GN=CDKE-1 PE=1 SV=2	AT5G63610
26.4781	24.8296	NaN	20.9238	21.9238	20.7075	27.1664	22.2328	22.9444	23.3585	26.4374	26.2807					+	AP1_WT_ELUATE_AP1_WT_INPUT	14	14	14	24.8	24.8	24.8	88.622	0	38.121	2206200000	52	50	42426000	4.26919	0.000635336	4.22331	7.14761	Q84V03	Q84V03	F-box protein At2g16365		2309	sp|Q84V03|FB348_ARATH F-box protein At2g16365 OS=Arabidopsis thaliana OX=3702 GN=At2g16365 PE=2 SV=2	AT2G16365
25.3506	25.0615	NaN	25.8754	24.6485	24.9583	25.3035	26.13	25.8362	26.112	25.4807	25.4667							11	11	9	29.2	29.2	23.5	49.628	0	31.413	4571500000	23	77	198760000	0.40182	0.906153	-0.260817	-0.890374	Q84VQ3;Q2V452	Q84VQ3	CBL-interacting serine/threonine-protein kinase 26	CIPK26	2312	sp|Q84VQ3|CIPKQ_ARATH CBL-interacting serine/threonine-protein kinase 26 OS=Arabidopsis thaliana OX=3702 GN=CIPK26 PE=1 SV=2	AT5G21326
24.0454	25.025	25.5154	27.459	28.853	28.2836	24.3221	28.7961	27.788	28.1243	26.3232	26.1391					+	AP1_WT_ELUATE_AP1_WT_INPUT	50	34	19	61	45.2	29.1	110.16	0	207.31	22292000000	61	243	365450000	4.29686	0.000609864	-2.98898	-6.74903	Q84VW9	Q84VW9	Phosphoenolpyruvate carboxylase 3	PPC3	2315	sp|Q84VW9|CAPP3_ARATH Phosphoenolpyruvate carboxylase 3 OS=Arabidopsis thaliana OX=3702 GN=PPC3 PE=1 SV=2	AT3G14940
28.0437	27.5727	27.9409	27.4032	26.9373	27.5034	28.0429	27.316	27.2902	27.2	28.5409	27.9184				Trihelix	+	AP1_WT_ELUATE_AP1_WT_INPUT	27	27	27	40	40	40	100.55	0	152.27	16561000000	52	182	318490000	3.19656	0.00405171	0.734911	4.88628	Q84W56	Q84W56		emb2746	2320	sp|Q84W56|RNJ_ARATH Ribonuclease J OS=Arabidopsis thaliana OX=3702 GN=RNJ PE=1 SV=1	AT5G63420
28.549	28.819	28.8407	28.239	28.6175	28.8598	28.6654	28.4776	29.004	28.6366	29.0422	28.7639							25	25	11	47.4	47.4	23.1	67.625	0	121.03	33750000000	34	316	992640000	0.516079	0.720094	0.140937	1.08181	Q84W89	Q84W89	DEAD-box ATP-dependent RNA helicase 37	RH37	2321	sp|Q84W89|RH37_ARATH DEAD-box ATP-dependent RNA helicase 37 OS=Arabidopsis thaliana OX=3702 GN=RH37 PE=2 SV=2	AT2G42520
26.0748	NaN	NaN	26.1978	25.9055	25.9474	25.154	25.835	25.9437	26.181	24.5732	25.3664							13	13	13	31	31	31	83.246	0	75.935	3997500000	31	60	128950000	1.60876	0.0835588	-0.709657	-2.76151	Q84WS0	Q84WS0	Subtilisin-like protease SBT1.1	SBTI1.1	2328	sp|Q84WS0|SBT11_ARATH Subtilisin-like protease SBT1.1 OS=Arabidopsis thaliana OX=3702 GN=SBTI1.1 PE=1 SV=1	AT1G01900
26.7078	26.7412	26.4479	21.808	21.9094	22.2128	27.2163	21.8875	22.8066	22.7239	26.0509	26.2752					+	AP1_WT_ELUATE_AP1_WT_INPUT	14	14	14	36	36	36	59.01	0	25.752	2147400000	27	37	79532000	8.14962	4.34508e-06	4.34853	17.6934	Q84WU1	Q84WU1		At5g53770	2330	tr|Q84WU1|Q84WU1_ARATH Nucleotidyltransferase family protein OS=Arabidopsis thaliana OX=3702 GN=MGN6.13 PE=1 SV=1	AT5G53770
24.886	NaN	NaN	26.8903	26.8758	26.6147	NaN	26.8077	26.6808	27.1593	25.6855	26.5172					+	AP1_WT_ELUATE_AP1_WT_INPUT	33	33	17	41.9	41.9	23.2	130.65	0	141.13	10787000000	65	169	165960000	1.98453	0.0401111	-1.14188	-3.47308	Q84WU2	Q84WU2	Ubiquitin carboxyl-terminal hydrolase 13	UBP13	2331	sp|Q84WU2|UBP13_ARATH Ubiquitin C-terminal hydrolase 13 OS=Arabidopsis thaliana OX=3702 GN=UBP13 PE=1 SV=1	AT3G11910
NaN	24.4451	NaN	27.5572	26.9676	26.8583	NaN	27.1247	27.4882	27.1583	25.4326	26.0769					+	AP1_WT_ELUATE_AP1_WT_INPUT	20	20	10	37.2	37.2	18.4	89.352	0	149.97	12173000000	44	145	276650000	2.95746	0.00637713	-1.8742	-5.31695	Q84WU8	Q84WU8	ATP-dependent zinc metalloprotease FTSH 3, mitochondrial	FTSH3	2332	sp|Q84WU8|FTSH3_ARATH ATP-dependent zinc metalloprotease FTSH 3, mitochondrial OS=Arabidopsis thaliana OX=3702 GN=FTSH3 PE=1 SV=1	AT2G29080
25.6616	25.5581	NaN	24.7033	24.6158	24.1436	24.2814	24.5657	24.9268	22.1359	25.027	24.8832							13	13	10	31.8	31.8	26.3	66.293	0	77.286	2238100000	34	30	65827000	0.934018	0.313009	0.900404	1.73695	Q84WV0	Q84WV0	Serine hydroxymethyltransferase 7	SHM7	2334	sp|Q84WV0|GLYC7_ARATH Serine hydroxymethyltransferase 7 OS=Arabidopsis thaliana OX=3702 GN=SHM7 PE=2 SV=1	AT1G36370
26.0799	26.6162	27.9399	28.4798	29.1778	29.218	25.2157	29.064	28.2904	28.6297	27.5818	27.105					+	AP1_WT_ELUATE_AP1_WT_INPUT	35	35	35	72.8	72.8	72.8	60.339	0	323.31	37084000000	38	299	975900000	3.04682	0.00538418	-2.05354	-4.65745	Q84WV1	Q84WV1	T-complex protein 1 subunit gamma	CCT3	2335	sp|Q84WV1|TCPG_ARATH T-complex protein 1 subunit gamma OS=Arabidopsis thaliana OX=3702 GN=CCT3 PE=1 SV=1	AT5G26360
29.4501	30.1965	29.6211	30.2121	30.8615	30.4731	30.1622	29.8077	30.2058	30.0616	30.1509	29.6545							22	20	19	50.1	47.3	45.6	61.674	0	323.31	155600000000	16	679	9724700000	1.11957	0.216187	-0.397754	-1.97952	Q84WV2	Q84WV2	Beta-glucosidase 20	BGLU20	2336	sp|Q84WV2|BGL20_ARATH Beta-glucosidase 20 OS=Arabidopsis thaliana OX=3702 GN=BGLU20 PE=2 SV=1	AT1G75940
26.3708	25.7192	26.2183	26.0499	26.6428	26.3224	27.1922	26.1757	25.4884	26.1578	NaN	26.7233							24	16	16	56.2	43.1	43.1	68.083	0	78.927	7632400000	40	173	190810000	0.514589	0.721755	0.305241	1.08583	Q84XF3	Q84XF3	Dynamin-related protein 1B	DRP1B	2342	sp|Q84XF3|DRP1B_ARATH Phragmoplastin DRP1B OS=Arabidopsis thaliana OX=3702 GN=DRP1B PE=1 SV=1	AT3G61760
NaN	NaN	NaN	23.164	21.4295	21.25	24.7767	21.4546	22.7555	24.8626	25.2242	24.6766							2	2	2	8.4	8.4	8.4	37.832	0	30.863	1039400000	12	22	86614000	1.60069	0.0845781	2.40644	2.83905	Q84Y18	Q84Y18	CAX-interacting protein 4	CXIP4	2345	sp|Q84Y18|CXIP4_ARATH CAX-interacting protein 4 OS=Arabidopsis thaliana OX=3702 GN=CXIP4 PE=1 SV=2	AT2G28910
27.01	27.4073	26.3053	24.9875	24.2706	22.9719	27.8797	24.7212	23.853	24.1665	26.1865	27.259				CAMTA	+	AP1_WT_ELUATE_AP1_WT_INPUT	24	24	24	35.5	35.5	35.5	116.11	0	241.02	4405000000	38	114	115920000	4.54132	0.000413095	2.84618	7.21484	Q8GSA7	Q8GSA7	Calmodulin-binding transcription activator 3	CMTA3	2348	sp|Q8GSA7|CMTA3_ARATH Calmodulin-binding transcription activator 3 OS=Arabidopsis thaliana OX=3702 GN=CAMTA3 PE=1 SV=1	AT2G22300
25.0698	25.2177	NaN	23.9181	22.7819	24.0092	25.0764	23.9861	24.2104	23.8594	24.8853	24.4758					+	AP1_WT_ELUATE_AP1_WT_INPUT	12	12	12	25.9	25.9	25.9	87.428	0	78.518	2408900000	36	57	66915000	2.80439	0.00835714	1.1508	4.46366	Q8GUG7	Q8GUG7	DEAD-box ATP-dependent RNA helicase 50	RH50	2350	sp|Q8GUG7|RH50_ARATH DEAD-box ATP-dependent RNA helicase 50 OS=Arabidopsis thaliana OX=3702 GN=RH50 PE=2 SV=2	AT3G06980
28.6874	27.5896	27.5228	32.3331	31.87	31.7335	27.7443	31.733	31.5838	31.8619	29.4047	28.4332					+	AP1_WT_ELUATE_AP1_WT_INPUT	29	29	29	48.2	48.2	48.2	81.479	0	323.31	243510000000	35	726	6957500000	6.27291	3.10584e-05	-3.62222	-11.2529	Q8GUK4;F4JJL8;Q9SVT4;Q9SZY3;Q8L7I2	Q8GUK4		At4g21650	2355	sp|Q8GUK4|SBT3D_ARATH Subtilisin-like protease SBT3.13 OS=Arabidopsis thaliana OX=3702 GN=SBT3.13 PE=2 SV=1	AT4G21650
NaN	NaN	NaN	23.8693	24.0347	23.828	NaN	24.574	24.7078	24.1594	24.8465	24.1857							2	2	2	11.1	11.1	11.1	25.58	0	6.568	1585000000	10	36	158500000	0.458353	0.810579	0.320537	1.01778	Q8GUK6;Q8LBA6	Q8GUK6;Q8LBA6	Probable CDP-diacylglycerol--inositol 3-phosphatidyltransferase 2;CDP-diacylglycerol--inositol 3-phosphatidyltransferase 1	PIS2;PIS1	2356	sp|Q8GUK6|PIS2_ARATH Probable CDP-diacylglycerol--inositol 3-phosphatidyltransferase 2 OS=Arabidopsis thaliana OX=3702 GN=PIS2 PE=2 SV=2;sp|Q8LBA6|PIS1_ARATH CDP-diacylglycerol--inositol 3-phosphatidyltransferase 1 OS=Arabidopsis thaliana OX=3702 GN=PIS1 P	AT1G68000;AT4G38570
25.1567	25.4619	NaN	23.5449	20.4895	23.9729	24.7581	23.6917	24.3398	23.487	24.755	24.5634							11	11	10	32.4	32.4	29.2	51.954	0	68.199	1353200000	18	50	75177000	1.55135	0.0927352	1.68472	2.61378	Q8GUK8	Q8GUK8		At5g10060	2357	tr|Q8GUK8|Q8GUK8_ARATH At5g10060 OS=Arabidopsis thaliana OX=3702 GN=At5g10060 PE=1 SV=1	AT5G10060
NaN	24.5848	NaN	28.2171	28.9267	28.7832	26.8315	28.7182	28.3332	28.337	26.6718	25.4926					+	AP1_WT_ELUATE_AP1_WT_INPUT	34	31	26	53.4	50.7	45.2	73.074	0	323.31	24852000000	40	258	621290000	3.4824	0.00246507	-2.6574	-5.98376	Q8GUM2	Q8GUM2	Heat shock 70 kDa protein 9, mitochondrial	HSP70-9	2361	sp|Q8GUM2|HSP7I_ARATH Heat shock 70 kDa protein 9, mitochondrial OS=Arabidopsis thaliana OX=3702 GN=HSP70-9 PE=1 SV=1	AT4G37910
NaN	26.4071	24.8739	26.671	27.0997	27.8201	26.1436	27.4316	27.5217	27.3922	27.1936	26.6644							16	16	16	43.5	43.5	43.5	49.648	0	323.31	17769000000	18	112	987170000	1.62747	0.0806899	-1.06622	-2.72073	Q8GUN1	Q8GUN1		At4g31340	2364	tr|Q8GUN1|Q8GUN1_ARATH AT4G31340 protein OS=Arabidopsis thaliana OX=3702 GN=At4g31340 PE=1 SV=1	AT4G31340
25.7441	26.4312	25.7869	24.5484	21.161	21.4905	26.733	23.8331	23.0153	23.505	24.9961	25.4813					+	AP1_WT_ELUATE_AP1_WT_INPUT	15	15	15	23.5	23.5	23.5	102.75	0	75.634	1875900000	51	56	36782000	3.1769	0.00419875	2.93658	4.85596	Q8GUP0	Q8GUP0		At1g17680	2368	tr|Q8GUP0|Q8GUP0_ARATH Tetratricopeptide repeat (TPR)-containing protein OS=Arabidopsis thaliana OX=3702 GN=At1g17680 PE=1 SV=1	AT1G17680
29.9467	28.9637	27.219	30.1809	29.5683	29.8469	29.8973	29.6849	29.0199	29.6243	28.2102	29.0447							43	43	43	56.4	56.4	56.4	94.208	0	323.31	104980000000	45	687	2332900000	0.928324	0.316531	-0.773916	-1.7106	Q8GUP3	Q8GUP3		At4g31880	2369	tr|Q8GUP3|Q8GUP3_ARATH Transcriptional regulator OS=Arabidopsis thaliana OX=3702 GN=At4g31880 PE=1 SV=1	AT4G31880
26.3661	NaN	NaN	20.9684	22.3543	23.558	26.7443	22.1971	22.5708	23.2486	25.5883	26.0318					+	AP1_WT_ELUATE_AP1_WT_INPUT	8	8	8	39.1	39.1	39.1	36.021	0	25.178	1583000000	15	34	105540000	4.09655	0.00083079	3.69974	7.34834	Q8GUP4	Q8GUP4		At5g10710	2370	tr|Q8GUP4|Q8GUP4_ARATH Centromere protein O OS=Arabidopsis thaliana OX=3702 GN=MAJ23.70 PE=1 SV=1	AT5G10710
26.9695	26.518	27.2972	24.7263	24.0865	23.4706	27.5555	21.9969	22.2743	22.609	26.7867	26.8588					+	AP1_WT_ELUATE_AP1_WT_INPUT	6	6	6	77.9	77.9	77.9	9.3472	0	125.88	3496500000	6	75	582750000	4.99889	0.000203031	3.80363	8.14791	Q8GW48	Q8GW48		HSBP	2374	sp|Q8GW48|HSBP_ARATH Heat shock factor-binding protein OS=Arabidopsis thaliana OX=3702 GN=HSBP PE=1 SV=1	AT4G15802
26.9361	27.1308	NaN	24.4242	25.4768	25.1391	27.5269	22.2276	22.5027	25.503	26.2121	26.8318					+	AP1_WT_ELUATE_AP1_WT_INPUT	10	10	10	28.7	28.7	28.7	59.694	0	47.721	3545200000	22	45	161140000	2.43551	0.0169364	2.71529	3.89116	Q8GWB1	Q8GWB1		At3g19895	2376	tr|Q8GWB1|Q8GWB1_ARATH RING/U-box superfamily protein OS=Arabidopsis thaliana OX=3702 GN=At3g19895 PE=1 SV=1	AT3G19895
25.7559	24.9109	NaN	25.316	24.8391	25.0855	25.5346	25.2942	24.5439	25.5997	26.5066	25.3193							12	12	12	60.1	60.1	60.1	32.57	0	54.622	6042200000	14	74	431580000	0.893609	0.338537	0.492376	1.67749	Q8GWB4	Q8GWB4		At2g43110	2378	tr|Q8GWB4|Q8GWB4_ARATH At2g43110 OS=Arabidopsis thaliana OX=3702 GN=At2g43110 PE=1 SV=1	AT2G43110
25.1902	25.0952	NaN	20.5798	21.6574	21.7314	24.9203	23.6114	22.3057	21.8005	24.2069	24.9332					+	AP1_WT_ELUATE_AP1_WT_INPUT	8	8	8	24.7	24.7	24.7	47.614	0	59.274	1056500000	23	35	45933000	3.7785	0.00144236	2.92148	6.16082	Q8GWE6	Q8GWE6		EER5	2383	sp|Q8GWE6|EER5_ARATH Enhanced ethylene response protein 5 OS=Arabidopsis thaliana OX=3702 GN=EER5 PE=1 SV=1	AT2G19560
25.1064	NaN	23.8774	24.3047	25.0685	25.3203	NaN	24.824	25.46	24.625	24.4062	24.6553							9	9	9	23.5	23.5	23.5	49.437	0	47.984	2511800000	24	42	104660000	0.704171	0.494874	-0.422429	-1.40508	Q8GWW8	Q8GWW8		GFA2	2390	sp|Q8GWW8|GFA2_ARATH Chaperone protein dnaJ GFA2, mitochondrial OS=Arabidopsis thaliana OX=3702 GN=GFA2 PE=2 SV=1	AT5G48030
NaN	26.3307	NaN	25.097	25.7042	25.7477	NaN	25.7146	25.824	25.4389	NaN	25.5698							11	11	11	41	41	41	39.643	0	134.77	4753200000	11	52	432110000	0.637834	0.562431	0.362557	1.33521	Q8GXB3	Q8GXB3	AT-hook motif nuclear-localized protein 5	AHL5	2396	sp|Q8GXB3|AHL5_ARATH AT-hook motif nuclear-localized protein 5 OS=Arabidopsis thaliana OX=3702 GN=AHL5 PE=1 SV=1	AT1G63470
27.0486	25.908	25.2792	22.7891	22.4719	25.9898	24.5735	24.555	26.1311	25.6408	27.1018	27.929							10	10	10	46.7	46.7	46.7	28.677	0	165.66	5405900000	12	95	450490000	1.15942	0.200141	1.7104	2.03455	Q8GXC5	Q8GXC5			2397	tr|Q8GXC5|Q8GXC5_ARATH DNA-binding protein OS=Arabidopsis thaliana OX=3702 GN=At1g75560 PE=1 SV=1	AT1G75560
30.187	29.9856	29.9664	27.5029	26.9903	27.1923	30.0668	26.4511	26.9025	27.0264	29.1387	29.4072					+	AP1_WT_ELUATE_AP1_WT_INPUT	23	23	23	65.8	65.8	65.8	60.019	0	323.31	23527000000	22	354	1069400000	6.71544	1.68166e-05	2.78101	12.5424	Q8GXJ1	Q8GXJ1	Histone deacetylase 15	HDA15	2400	sp|Q8GXJ1|HDA15_ARATH Histone deacetylase 15 OS=Arabidopsis thaliana OX=3702 GN=HDA15 PE=1 SV=2	AT3G18520
28.2579	27.619	27.2663	22.5488	21.5062	21.7088	28.373	23.8699	23.9185	24.5699	26.2172	28.3899				SBP	+	AP1_WT_ELUATE_AP1_WT_INPUT	11	10	10	43.2	41.1	41.1	36.827	0	63.066	6791100000	16	89	424450000	4.65663	0.000351431	4.66688	7.44219	Q8GXL3;Q9S7A9;Q94JW8;Q9S7P5;Q700C2;Q8RY95	Q8GXL3	Squamosa promoter-binding-like protein 8	SPL8	2403	sp|Q8GXL3|SPL8_ARATH Squamosa promoter-binding-like protein 8 OS=Arabidopsis thaliana OX=3702 GN=SPL8 PE=1 SV=2	AT1G02065
NaN	NaN	NaN	22.123	22.4375	21.8818	24.5436	22.4925	22.1216	21.2011	NaN	24.4925					+	AP1_WT_ELUATE_AP1_WT_INPUT	7	7	7	16.5	16.5	16.5	68.736	0	13.974	436560000	35	17	12473000	3.39309	0.00287884	2.47514	7.0594	Q8GXR1	Q8GXR1			2407	tr|Q8GXR1|Q8GXR1_ARATH Transcription initiation factor TFIID subunit OS=Arabidopsis thaliana OX=3702 GN=At5g65540 PE=1 SV=1	AT5G65540
22.8981	NaN	NaN	24.6617	25.7644	26.1111	25.5409	26.9116	26.9091	27.2401	25.2982	25.9447							7	7	7	38.5	38.5	38.5	22.829	0	79.16	16032000000	11	106	1457400000	0.985598	0.281021	-1.34584	-1.83794	Q8GXS3	Q8GXS3	Pre-mRNA cleavage factor Im 25 kDa subunit 2	CFIS2	2409	sp|Q8GXS3|CFIS2_ARATH Pre-mRNA cleavage factor Im 25 kDa subunit 2 OS=Arabidopsis thaliana OX=3702 GN=CFIS2 PE=1 SV=1	AT4G25550
27.451	27.3241	25.3647	22.7431	25.1021	24.0386	27.0433	26.0602	25.6462	25.8304	26.4263	26.983					+	AP1_WT_ELUATE_AP1_WT_INPUT	17	17	17	49.6	49.6	49.6	51.146	0	49.05	6642000000	25	134	265680000	1.91114	0.046382	1.86197	3.04911	Q8GY84	Q8GY84	DEAD-box ATP-dependent RNA helicase 10	RH10	2419	sp|Q8GY84|RH10_ARATH DEAD-box ATP-dependent RNA helicase 10 OS=Arabidopsis thaliana OX=3702 GN=RH10 PE=1 SV=2	AT5G60990
26.5545	26.9604	26.1223	23.985	24.0425	24.0394	28.4592	23.7213	24.4213	23.4715	26.0332	28.3329				C2H2	+	AP1_WT_ELUATE_AP1_WT_INPUT	17	17	10	36.6	36.6	29.8	55.793	0	301.66	8623000000	22	108	391950000	4.34155	0.00056306	3.13024	6.83259	Q8GYC1;Q9FFH3;Q9ZWA6	Q8GYC1	Protein indeterminate-domain 4, chloroplastic	IDD4	2422	sp|Q8GYC1|IDD4_ARATH Protein indeterminate-domain 4, chloroplastic OS=Arabidopsis thaliana OX=3702 GN=IDD4 PE=1 SV=1	AT2G02080
28.8663	28.9611	26.883	25.0899	24.674	23.546	28.7055	24.4966	24.6116	24.8419	27.2185	28.1344					+	AP1_WT_ELUATE_AP1_WT_INPUT	23	23	22	52.4	52.4	51.1	63.174	0	106.81	10382000000	29	181	358010000	5.15397	0.000161576	3.58481	8.48382	Q8GYE8	Q8GYE8			2426	sp|Q8GYE8|NSUN5_ARATH 25S rRNA (cytosine-C(5))-methyltransferase NSUN5 OS=Arabidopsis thaliana OX=3702 GN=NSUN5 PE=1 SV=1	AT5G26180
NaN	26.4404	NaN	23.1525	21.924	22.2095	27.0707	25.7348	25.3505	21.7372	24.8338	25.8719							17	10	10	21.3	13.8	13.8	119.12	0	14.726	1929700000	57	16	33854000	1.60993	0.0834013	2.70278	2.76326	Q8GZ42	Q8GZ42	Histone-lysine N-methyltransferase ATX5	ATX5	2438	sp|Q8GZ42|ATX5_ARATH Histone-lysine N-methyltransferase ATX5 OS=Arabidopsis thaliana OX=3702 GN=ATX5 PE=2 SV=1	AT5G53430
25.8056	25.4475	25.1798	25.4691	24.8579	25.0393	25.698	22.3099	25.034	24.7149	25.9971	25.5116							12	12	12	27.6	27.6	27.6	76.903	0	23.076	3150500000	35	59	90013000	1.25382	0.167624	1.03572	2.1639	Q8GZ81	Q8GZ81			2439	sp|Q8GZ81|OFT27_ARATH O-fucosyltransferase 27 OS=Arabidopsis thaliana OX=3702 GN=OFUT27 PE=2 SV=1	AT3G30300
26.5367	26.2165	26.2643	25.8806	25.152	25.3768	26.1296	25.1515	24.8875	24.9033	26.4649	26.309					+	AP1_WT_ELUATE_AP1_WT_INPUT	8	8	8	16	16	16	72.848	0	39.053	3787400000	31	55	122170000	4.27476	0.000629011	1.09485	6.70796	Q8GZ87	Q8GZ87		IQD28	2440	sp|Q8GZ87|IQD28_ARATH Protein IQ-DOMAIN 28 OS=Arabidopsis thaliana OX=3702 GN=IQD28 PE=1 SV=1	AT1G14380
24.9928	NaN	NaN	21.953	22.3408	24.8528	NaN	24.7624	22.305	24.7009	25.3781	NaN							8	8	5	20.5	20.5	13.1	60.53	0	14.113	1662400000	23	13	72278000	0.796359	0.413824	1.69959	1.60405	Q8H0S2	Q8H0S2			2446	tr|Q8H0S2|Q8H0S2_ARATH At4g23490/F16G20_190 OS=Arabidopsis thaliana OX=3702 GN=At4g23490 PE=1 SV=1	AT4G23490
23.6503	NaN	NaN	26.0145	26.6436	26.9173	NaN	26.2633	26.7243	26.6248	26.8397	26.2369							27	27	27	46.9	46.9	46.9	99.157	0	142.55	7451500000	49	149	152070000	0.70572	0.493702	-0.955677	-1.42596	Q8H0S9	Q8H0S9	Puromycin-sensitive aminopeptidase	MPA1	2448	sp|Q8H0S9|PSA_ARATH Puromycin-sensitive aminopeptidase OS=Arabidopsis thaliana OX=3702 GN=MPA1 PE=2 SV=1	AT1G63770
25.5531	25.6396	24.8695	26.726	27.3198	27.5945	NaN	27.3839	27.4744	27.6053	26.9847	26.5324					+	AP1_WT_ELUATE_AP1_WT_INPUT	77	77	30	33.3	33.3	16	403.61	0	232.11	14798000000	167	239	88611000	2.42786	0.0171809	-1.4348	-3.87959	Q8H0T4	Q8H0T4	E3 ubiquitin-protein ligase UPL2	UPL2	2449	sp|Q8H0T4|UPL2_ARATH E3 ubiquitin-protein ligase UPL2 OS=Arabidopsis thaliana OX=3702 GN=UPL2 PE=1 SV=3	AT1G70320
NaN	NaN	25.6063	24.2049	24.5439	24.4373	25.3609	24.9879	24.7531	25.1155	25.0647	25.1942					+	AP1_WT_ELUATE_AP1_WT_INPUT	11	11	11	12.6	12.6	12.6	133.03	0	25.274	2052900000	57	27	36015000	1.89101	0.0481482	0.63272	3.18745	Q8H0U8;Q9SF41	Q8H0U8	DEAD-box ATP-dependent RNA helicase 42	RH42	2454	sp|Q8H0U8|RH42_ARATH DEAD-box ATP-dependent RNA helicase 42 OS=Arabidopsis thaliana OX=3702 GN=RH42 PE=1 SV=2	AT1G20920
NaN	NaN	NaN	24.3529	24.4751	24.1711	NaN	24.7913	24.5587	25.422	24.5876	24.7981							12	12	12	26.3	26.3	26.3	79.643	0	103.6	2908400000	33	52	88132000	0.0691668	1	0.064318	0.193739	Q8H0V6	Q8H0V6	ABC transporter F family member 3	ABCF3	2457	sp|Q8H0V6|AB3F_ARATH ABC transporter F family member 3 OS=Arabidopsis thaliana OX=3702 GN=ABCF3 PE=1 SV=1	AT1G64550
26.6195	26.988	26.6374	26.7794	27.2265	27.9663	27.6148	27.988	28.1208	27.2892	27.4198	27.2758							14	14	14	77.9	77.9	77.9	23.41	0	222.31	15006000000	14	153	1071900000	0.914008	0.32568	-0.469173	-1.69007	Q8H0Y1	Q8H0Y1	Outer envelope pore protein 24B, chloroplastic	OEP24B	2459	sp|Q8H0Y1|OP24B_ARATH Outer envelope pore protein 24B, chloroplastic OS=Arabidopsis thaliana OX=3702 GN=OEP24B PE=2 SV=1	AT5G42960
NaN	NaN	NaN	24.4583	24.4912	24.5722	NaN	24.1243	23.7126	24.1025	24.5179	25.5113							11	8	8	23.9	19.4	19.4	60.332	0	53.872	2271000000	31	74	73258000	1.20508	0.183454	0.771115	2.2851	Q8H104	Q8H104		At4g26870	2462	sp|Q8H104|SYDC1_ARATH Aspartate--tRNA ligase 1, cytoplasmic OS=Arabidopsis thaliana OX=3702 GN=At4g26870 PE=2 SV=1	AT4G26870
25.5569	25.8281	NaN	27.9602	26.6183	26.843	25.7903	26.9641	27.061	26.9562	26.4866	26.2066					+	AP1_WT_ELUATE_AP1_WT_INPUT	9	9	8	46.9	46.9	37.3	35.721	0	311.35	10499000000	15	115	699920000	2.67473	0.0107588	-1.09344	-4.25882	Q8H112	Q8H112	PGR5-like protein 1A, chloroplastic	PGRL1A	2465	sp|Q8H112|PGL1A_ARATH PGR5-like protein 1A, chloroplastic OS=Arabidopsis thaliana OX=3702 GN=PGRL1A PE=1 SV=1	AT4G22890
25.1059	25.4097	NaN	27.672	27.5644	27.5968	24.4312	27.2148	27.2646	26.7719	25.4704	25.9672					+	AP1_WT_ELUATE_AP1_WT_INPUT	32	13	11	58.6	26.7	23.2	69.355	0	239.6	13523000000	36	117	375640000	4.45508	0.000468177	-2.07054	-7.54935	Q8H118	Q8H118	Probable methyltransferase PMT1		2467	sp|Q8H118|PMT1_ARATH Probable methyltransferase PMT1 OS=Arabidopsis thaliana OX=3702 GN=At3g23300 PE=2 SV=2	AT3G23300
28.0203	28.0256	28.1306	26.8656	26.7972	27.1628	27.6506	26.9504	27.1506	27.2043	27.5704	27.9727					+	AP1_WT_ELUATE_AP1_WT_INPUT	23	22	12	43.8	42	25	67.727	0	149.32	14278000000	37	194	385880000	4.67424	0.000344928	0.873185	7.47736	Q8H136	Q8H136	DEAD-box ATP-dependent RNA helicase 14	RH14	2470	sp|Q8H136|RH14_ARATH DEAD-box ATP-dependent RNA helicase 14 OS=Arabidopsis thaliana OX=3702 GN=RH14 PE=1 SV=2	AT3G01540
NaN	NaN	NaN	23.5789	21.8129	22.263	NaN	25.8378	25.1324	22.517	25.8154	26.2728							6	6	5	13.1	13.1	11.4	64.401	0	7.5737	1963700000	35	29	56106000	1.06539	0.240404	2.52043	2.05184	Q8H1D3	Q8H1D3	BTB/POZ domain-containing protein NPY1	NPY1	2472	sp|Q8H1D3|NPY1_ARATH BTB/POZ domain-containing protein NPY1 OS=Arabidopsis thaliana OX=3702 GN=NPY1 PE=2 SV=1	AT4G31820
NaN	NaN	NaN	24.3683	24.645	25.126	NaN	24.1112	24.9197	24.8188	24.9609	24.3769							10	10	10	35.9	35.9	35.9	48.316	0	48.698	1735500000	26	36	66750000	0.00438028	1	0.00406837	0.0131105	Q8H1E2	Q8H1E2		At5g58330	2473	sp|Q8H1E2|MDHNP_ARATH Malate dehydrogenase [NADP], chloroplastic OS=Arabidopsis thaliana OX=3702 GN=At5g58330 PE=2 SV=1	AT5G58330
NaN	NaN	NaN	25.162	25.6655	25.5245	NaN	24.6684	25.3569	24.9363	24.8468	24.5772							4	4	2	26.5	26.5	20.4	19.876	0	14.481	3382000000	5	46	676400000	0.898606	0.335087	-0.506962	-1.77471	Q8H1F4	Q8H1F4	Coatomer subunit zeta-3		2477	sp|Q8H1F4|COPZ3_ARATH Coatomer subunit zeta-3 OS=Arabidopsis thaliana OX=3702 GN=At4g08520 PE=2 SV=1	AT4G08520
25.1111	25.3978	26.9896	25.0091	23.5792	23.8116	26.6048	25.0708	24.979	24.6783	23.7414	25.22							8	8	8	54.6	54.6	54.6	22.286	0	19.012	2745100000	9	57	305010000	1.00031	0.273079	0.989466	1.81289	Q8H1F8	Q8H1F8		At1g75670	2480	tr|Q8H1F8|Q8H1F8_ARATH DNA-directed RNA polymerase OS=Arabidopsis thaliana OX=3702 GN=At1g75670 PE=1 SV=1	AT1G75670
NaN	24.9993	NaN	20.9583	25.0578	25.1197	NaN	25.2085	24.8374	24.8948	24.7654	NaN							8	8	5	35.7	35.7	23	39.819	0	48.038	2303800000	23	24	100170000	0.16676	1	0.536224	0.431547	Q8H1G6	Q8H1G6	PTI1-like tyrosine-protein kinase 1	PTI11	2483	sp|Q8H1G6|PTI11_ARATH PTI1-like tyrosine-protein kinase 1 OS=Arabidopsis thaliana OX=3702 GN=PTI11 PE=1 SV=1	AT1G06700
26.5856	27.5251	28.5996	23.8232	23.5204	23.7571	28.9519	24.1358	24.3602	23.87	26.7547	27.6231					+	AP1_WT_ELUATE_AP1_WT_INPUT	11	11	11	35.8	35.8	35.8	47.543	0	26.717	4755700000	16	73	297230000	5.48281	9.51733e-05	3.7622	9.23193	Q8H1R6	Q8H1R6		At4g21520	2487	tr|Q8H1R6|Q8H1R6_ARATH Transducin/WD40 repeat-like superfamily protein OS=Arabidopsis thaliana OX=3702 GN=At4g21520 PE=1 SV=1	AT4G21520
NaN	25.3995	25.4416	21.9382	22.8734	23.0401	25.5814	22.321	22.3487	21.8949	25.0769	25.3401					+	AP1_WT_ELUATE_AP1_WT_INPUT	14	14	14	23.4	23.4	23.4	105.14	0	29.482	638710000	47	37	13589000	6.45284	2.27742e-05	2.96517	13.1472	Q8H1S7	Q8H1S7		B160	2490	tr|Q8H1S7|Q8H1S7_ARATH Protein B160 OS=Arabidopsis thaliana OX=3702 GN=B160 PE=1 SV=1	AT4G21430
NaN	NaN	NaN	26.5099	27.7682	27.11	26.1186	27.9979	27.1656	27.6404	24.9105	25.3463					+	AP1_WT_ELUATE_AP1_WT_INPUT	18	18	12	43.8	43.8	32.8	43.358	0	82.016	10547000000	20	117	527370000	2.69863	0.0102323	-1.90685	-4.78462	Q8H1Y0	Q8H1Y0	Pyruvate dehydrogenase E1 component subunit alpha-2, mitochondrial	IAR4	2491	sp|Q8H1Y0|ODPA2_ARATH Pyruvate dehydrogenase E1 component subunit alpha-2, mitochondrial OS=Arabidopsis thaliana OX=3702 GN=IAR4 PE=1 SV=2	AT1G24180
27.239	27.0855	27.9554	28.2397	27.8902	28.0355	27.1278	27.6617	27.9446	27.429	27.1183	27.1517					+	AP1_WT_ELUATE_AP1_WT_INPUT	18	18	18	39.2	39.2	39.2	72.288	0	147	17455000000	29	178	601910000	2.07177	0.0341679	-0.587184	-3.26675	Q8H1Z0	Q8H1Z0	Protein ECERIFERUM 3	CER3	2492	sp|Q8H1Z0|CER3_ARATH Very-long-chain aldehyde decarbonylase CER3 OS=Arabidopsis thaliana OX=3702 GN=CER3 PE=1 SV=1	AT5G57800
25.755	NaN	NaN	27.9342	27.2064	27.7591	25.7392	27.2106	28.0462	27.6871	25.416	26.0247				B3	+	AP1_WT_ELUATE_AP1_WT_INPUT	12	12	8	44.3	44.3	32.3	39.274	0	80.232	23304000000	14	146	1664600000	4.79916	0.000282886	-1.90684	-9.19072	Q8L3W1	Q8L3W1	B3 domain-containing transcription factor VRN1	VRN1	2496	sp|Q8L3W1|VRN1_ARATH B3 domain-containing transcription factor VRN1 OS=Arabidopsis thaliana OX=3702 GN=VRN1 PE=1 SV=1	AT3G18990
24.0467	NaN	NaN	26.7189	26.8641	27.1337	23.7849	28.2952	28.4653	27.6422	27.5204	26.1577							10	10	10	40.8	40.8	40.8	29.567	0	56.381	17236000000	14	163	1231200000	1.55635	0.091896	-2.14249	-2.6835	Q8L3X8	Q8L3X8	Serine/arginine-rich SC35-like splicing factor SCL30	SCL30	2497	sp|Q8L3X8|SRC30_ARATH Serine/arginine-rich SC35-like splicing factor SCL30 OS=Arabidopsis thaliana OX=3702 GN=SCL30 PE=1 SV=1	AT3G55460
26.5359	NaN	26.8398	26.3732	25.6697	25.4359	25.6042	26.0435	25.6337	26.4173	26.481	26.0389							14	14	14	64.4	64.4	64.4	30.333	0	95.745	10991000000	15	92	732740000	0.696152	0.502895	0.371094	1.37864	Q8L403	Q8L403			2498	tr|Q8L403|Q8L403_ARATH Uncharacterized protein At1g15425 OS=Arabidopsis thaliana OX=3702 GN=At1g15420 PE=1 SV=1	AT1G15420
27.4528	27.4498	26.9347	27.5813	27.1631	27.2867	27.3192	27.0223	27.1163	27.0432	27.2471	27.47							12	12	12	26.4	26.4	26.4	65.199	0	217.35	9578400000	22	120	435380000	0.422165	0.871334	0.110086	0.921874	Q8L4D8	Q8L4D8	Protein IQ-DOMAIN 31	IQD31	2502	sp|Q8L4D8|IQD31_ARATH Protein IQ-DOMAIN 31 OS=Arabidopsis thaliana OX=3702 GN=IQD31 PE=1 SV=1	AT1G74690
27.6101	27.8136	28.1722	27.9755	27.8503	27.5213	29.005	27.283	27.1305	27.2781	28.0567	28.1814							23	23	23	87.3	87.3	87.3	39.904	0	323.31	26606000000	19	357	1400300000	1.60649	0.0836899	0.633375	2.63971	Q8L4Y5	Q8L4Y5	Actin-related protein 7	ARP7	2506	sp|Q8L4Y5|ARP7_ARATH Actin-related protein 7 OS=Arabidopsis thaliana OX=3702 GN=ARP7 PE=1 SV=1	AT3G60830
29.6336	29.1455	30.4506	30.7976	30.1733	30.3028	29.8428	30.2179	29.9958	30.3792	28.9938	29.5769							70	70	70	59.9	59.9	59.9	173.02	0	323.31	141730000000	72	1037	1968400000	1.82585	0.0545768	-0.703886	-2.9342	Q8L5Y4	Q8L5Y4		EMB2765	2514	tr|Q8L5Y4|Q8L5Y4_ARATH P-loop containing nucleoside triphosphate hydrolases superfamily protein OS=Arabidopsis thaliana OX=3702 GN=EMB2765 PE=1 SV=1	AT2G38770
26.1194	26.9724	NaN	25.2006	25.7267	25.5024	25.9059	25.3871	25.3754	25.6282	26.752	26.4796					+	AP1_WT_ELUATE_AP1_WT_INPUT	27	27	27	31.2	31.2	31.2	134.9	0	121.58	6055900000	68	151	89057000	3.1067	0.00480067	0.975782	4.95846	Q8L5Y6	Q8L5Y6	Cullin-associated NEDD8-dissociated protein 1	CAND1	2515	sp|Q8L5Y6|CAND1_ARATH Cullin-associated NEDD8-dissociated protein 1 OS=Arabidopsis thaliana OX=3702 GN=CAND1 PE=1 SV=1	AT2G02560
24.1819	25.9577	NaN	28.3465	28.9987	28.964	24.1115	28.6515	28.7654	28.7492	27.6111	27.3816					+	AP1_WT_ELUATE_AP1_WT_INPUT	34	34	34	43.1	43.1	43.1	119.87	0	323.31	30429000000	47	275	647420000	2.65271	0.0112773	-2.89713	-4.22445	Q8L611	Q8L611	Protein transport protein SEC31 homolog B	SEC31B	2523	sp|Q8L611|SC31B_ARATH Protein transport protein SEC31 homolog B OS=Arabidopsis thaliana OX=3702 GN=SEC31B PE=1 SV=1	AT3G63460
26.0512	25.5608	26.1095	29.1027	29.2517	29.3946	25.602	28.7449	29.1235	28.5065	27.3122	26.6221					+	AP1_WT_ELUATE_AP1_WT_INPUT	13	13	13	31.6	31.6	31.6	63.416	0	323.31	33607000000	18	222	1867000000	5.49652	9.41049e-05	-2.81104	-9.26424	Q8L636	Q8L636		At1g53210	2524	sp|Q8L636|NCL_ARATH Sodium/calcium exchanger NCL OS=Arabidopsis thaliana OX=3702 GN=NCL PE=2 SV=1	AT1G53210
25.4502	24.9556	25.4643	25.0234	24.318	24.1155	24.6291	25.0655	25.0853	25.2938	24.5614	24.784							19	19	18	44.2	44.2	42.1	69.045	0	65.052	3811500000	32	80	119110000	0.259566	1	0.157175	0.618473	Q8L643	Q8L643		At2g34750	2527	tr|Q8L643|Q8L643_ARATH RNA polymerase I specific transcription initiation factor RRN3 protein OS=Arabidopsis thaliana OX=3702 GN=At2g34750 PE=1 SV=1	AT2G34750
26.0158	25.7829	26.3283	25.0912	24.5116	25.1319	25.6354	25.0385	24.8355	24.7713	25.4989	25.7446					+	AP1_WT_ELUATE_AP1_WT_INPUT	13	13	13	33.3	33.3	33.3	47.987	0	27.173	3855800000	21	73	183610000	3.90752	0.00116127	0.93767	6.04925	Q8L6Z4	Q8L6Z4			2530	sp|Q8L6Z4|RPS9M_ARATH 30S ribosomal protein S9, mitochondrial OS=Arabidopsis thaliana OX=3702 GN=RPS9M PE=1 SV=1	AT3G49080
NaN	NaN	NaN	25.4487	25.6016	25.5663	NaN	25.3402	25.6903	25.4503	24.4364	24.4306					+	AP1_WT_ELUATE_AP1_WT_INPUT	14	14	14	31.3	31.3	31.3	92.553	0	95.325	3530500000	29	86	121740000	4.58187	0.000392096	-1.08274	-11.4834	Q8L745	Q8L745		At5g42220	2540	tr|Q8L745|Q8L745_ARATH AT5g42220/K5J14_2 OS=Arabidopsis thaliana OX=3702 GN=At5g42220 PE=1 SV=1	AT5G42220
NaN	NaN	NaN	27.76	26.6064	26.9058	25.4001	26.7061	26.6565	27.3653	25.4403	24.1108					+	AP1_WT_ELUATE_AP1_WT_INPUT	25	25	25	37.4	37.4	37.4	125.33	0	323.31	15008000000	50	222	300160000	2.83453	0.00795855	-2.01624	-5.05976	Q8L748	Q8L748	Nuclear pore complex protein NUP107	NUP107	2541	sp|Q8L748|NU107_ARATH Nuclear pore complex protein NUP107 OS=Arabidopsis thaliana OX=3702 GN=NUP107 PE=1 SV=1	AT3G14120
NaN	NaN	NaN	23.1789	23.0452	23.5667	NaN	22.9827	23.5302	23.4482	25.4052	24.2231					+	AP1_WT_ELUATE_AP1_WT_INPUT	4	4	4	23	23	23	25.006	0	15.928	1114700000	16	11	69667000	2.39198	0.0184179	1.52214	4.51121	Q8L7C9	Q8L7C9	Glutathione S-transferase U20	GSTU20	2555	sp|Q8L7C9|GSTUK_ARATH Glutathione S-transferase U20 OS=Arabidopsis thaliana OX=3702 GN=GSTU20 PE=1 SV=1	AT1G78370
25.4944	26.1766	NaN	21.2256	25.4734	25.1126	25.4911	25.1877	25.3257	22.8335	26.8535	25.9536							19	8	5	74.2	38.8	27	21.284	0	21.149	3318600000	8	51	414830000	1.24562	0.170208	1.80077	2.18399	Q8L7K0	Q8L7K0	60S ribosomal protein L18a-1	RPL18AA	2560	sp|Q8L7K0|R18A1_ARATH 60S ribosomal protein L18a-1 OS=Arabidopsis thaliana OX=3702 GN=RPL18AA PE=2 SV=1	AT1G29965
25.3011	26.9683	27.2966	27.5113	27.4518	27.5673	26.1139	26.2671	26.5922	27.1067	25.5117	26.3666							6	6	6	31.4	31.4	31.4	36.782	0	323.31	17212000000	6	118	2868700000	1.21695	0.179263	-0.823042	-2.11353	Q8L7L5	Q8L7L5	AT-hook motif nuclear-localized protein 11	AHL11	2563	sp|Q8L7L5|AHL11_ARATH AT-hook motif nuclear-localized protein 11 OS=Arabidopsis thaliana OX=3702 GN=AHL11 PE=2 SV=1	AT3G61310
NaN	NaN	NaN	24.5281	25.2767	24.6941	NaN	24.9508	25.0699	24.8764	24.8534	24.2336							30	8	8	75.9	25.2	25.2	58.927	0	41.441	2434500000	29	28	83948000	0.701357	0.497563	-0.355829	-1.44381	Q8L7N0	Q8L7N0	T-complex protein 1 subunit zeta 2	CCT6B	2565	sp|Q8L7N0|TCPZB_ARATH T-complex protein 1 subunit zeta 2 OS=Arabidopsis thaliana OX=3702 GN=CCT6B PE=1 SV=1	AT5G16070
26.4737	25.9786	26.7045	23.1568	23.8255	24.7628	25.8966	24.3367	24.5817	24.2545	26.2453	26.5147					+	AP1_WT_ELUATE_AP1_WT_INPUT	16	16	16	32.1	32.1	32.1	106.01	0	63.785	2467200000	37	82	66681000	4.89169	0.000241229	2.14923	7.92173	Q8L7S0	Q8L7S0	Probable ubiquitin-like-specific protease 2B	ULP2B	2571	sp|Q8L7S0|ULP2B_ARATH Probable ubiquitin-like-specific protease 2B OS=Arabidopsis thaliana OX=3702 GN=ULP2B PE=1 SV=3	AT1G09730
30.4212	30.2507	31.133	29.9915	29.742	30.2553	31.3312	30.4539	30.1715	30.2167	30.8893	30.6411					+	AP1_WT_ELUATE_AP1_WT_INPUT	51	51	51	66.6	66.6	66.6	81.155	0	323.31	114100000000	37	878	3083800000	2.05227	0.0354306	0.639258	3.24022	Q8L7S8	Q8L7S8	DEAD-box ATP-dependent RNA helicase 3, chloroplastic	RH3	2573	sp|Q8L7S8|RH3_ARATH DEAD-box ATP-dependent RNA helicase 3, chloroplastic OS=Arabidopsis thaliana OX=3702 GN=RH3 PE=1 SV=2	AT5G26742
NaN	NaN	NaN	22.2038	22.7412	21.4922	NaN	23.8933	23.5266	21.9979	24.2826	24.5979							2	2	2	3.9	3.9	3.9	92.296	0	6.1367	893990000	35	8	25542000	1.3849	0.128662	1.79775	2.58986	Q8L7T4	Q8L7T4		At3g13990	2574	tr|Q8L7T4|Q8L7T4_ARATH AT3g13990/MDC16_11 OS=Arabidopsis thaliana OX=3702 GN=At3g13990 PE=1 SV=1	AT3G13990
24.7165	NaN	NaN	24.442	24.5685	21.6115	24.4793	22.1201	23.1736	24.3389	26.3705	25.5875							5	5	5	26.1	26.1	26.1	25.471	0	86.417	2430000000	8	33	303750000	1.49428	0.103481	1.91268	2.59143	Q8L7U4	Q8L7U4		At4g02450	2578	sp|Q8L7U4|P23A_ARATH Co-chaperone protein p23-1 OS=Arabidopsis thaliana OX=3702 GN=P23-1 PE=1 SV=1	AT4G02450
NaN	NaN	24.524	26.7124	27.1728	27.0201	26.2315	26.8043	27.0757	26.7235	26.0442	26.5936							37	13	13	54.2	23.5	23.5	102.48	0	71.75	10723000000	45	93	238300000	1.67414	0.0731852	-1.0698	-2.85922	Q8L828	Q8L828	Coatomer subunit beta-3		2584	sp|Q8L828|COB23_ARATH Coatomer subunit beta-3 OS=Arabidopsis thaliana OX=3702 GN=At3g15980 PE=2 SV=1	AT3G15980
NaN	25.8083	NaN	21.6101	20.502	22.7104	26.1767	22.218	23.2704	23.0251	25.187	25.4931				GRF	+	AP1_WT_ELUATE_AP1_WT_INPUT	11	11	11	44.8	44.8	44.8	44.695	0	24.402	1502000000	19	34	79054000	3.60269	0.00197469	3.4436	6.23538	Q8L8A6	Q8L8A6	Growth-regulating factor 5	GRF5	2595	sp|Q8L8A6|GRF5_ARATH Growth-regulating factor 5 OS=Arabidopsis thaliana OX=3702 GN=GRF5 PE=1 SV=1	AT3G13960
NaN	NaN	NaN	21.9394	23.1063	20.5496	24.4638	23.2878	23.5001	20.9744	NaN	24.0497				GRF			3	3	3	12.4	12.4	12.4	42.533	0	87.253	254220000	13	9	19555000	1.12086	0.215748	2.03046	2.14423	Q8L8A7	Q8L8A7	Growth-regulating factor 4	GRF4	2596	sp|Q8L8A7|GRF4_ARATH Growth-regulating factor 4 OS=Arabidopsis thaliana OX=3702 GN=GRF4 PE=1 SV=1	AT3G52910
29.2851	28.5463	29.165	22.373	22.7662	23.1181	28.5566	23.3445	22.6511	24.4198	23.2646	28.5145					+	AP1_WT_ELUATE_AP1_WT_INPUT	14	14	14	58.7	58.7	58.7	31.786	0	256.22	8722700000	11	163	792970000	3.18521	0.00412825	4.77654	4.86876	Q8L8C2	Q8L8C2		MEE21	2598	tr|Q8L8C2|Q8L8C2_ARATH PIN domain-like family protein OS=Arabidopsis thaliana OX=3702 GN=MEE21 PE=1 SV=1	AT2G34570
29.5398	29.5268	28.9572	28.7646	28.7364	28.6434	29.6864	28.4791	28.7899	28.4821	29.8163	29.2422					+	AP1_WT_ELUATE_AP1_WT_INPUT	18	6	6	54.6	19.7	19.7	30.771	0	323.31	45811000000	16	274	2863200000	3.76614	0.00146882	0.812173	5.80692	Q93VB8;Q8L8Y0	Q93VB8;Q8L8Y0	40S ribosomal protein S2-2;40S ribosomal protein S2-1	RPS2B;RPS2A	2602	sp|Q93VB8|RS22_ARATH 40S ribosomal protein S2-2 OS=Arabidopsis thaliana OX=3702 GN=RPS2B PE=2 SV=1;sp|Q8L8Y0|RS21_ARATH 40S ribosomal protein S2-1 OS=Arabidopsis thaliana OX=3702 GN=RPS2A PE=2 SV=2	AT1G58380;AT1G58684
25.5575	25.5324	23.5568	26.1603	26.9469	26.5818	NaN	26.8486	26.5825	26.6873	26.2408	26.215							10	10	6	33.7	33.7	18.8	33.216	0	52.453	7356300000	14	70	525450000	1.57097	0.0891357	-1.21403	-2.64132	Q8L940	Q8L940	Pyridoxal 5-phosphate synthase subunit PDX1.3	PDX13	2605	sp|Q8L940|PDX13_ARATH Pyridoxal 5-phosphate synthase subunit PDX1.3 OS=Arabidopsis thaliana OX=3702 GN=PDX13 PE=1 SV=2	AT5G01410
26.9139	NaN	NaN	26.7723	27.1332	27.1723	27.3449	26.8676	27.472	26.83	27.8101	27.6231							5	3	3	47.6	31	31	9.49	0	55.736	15311000000	3	77	5103800000	0.996852	0.275081	0.381783	1.85483	Q8L953	Q8L953	40S ribosomal protein S27-3	RPS27D	2606	sp|Q8L953|RS273_ARATH 40S ribosomal protein S27-3 OS=Arabidopsis thaliana OX=3702 GN=RPS27D PE=2 SV=2	AT5G47930
NaN	NaN	NaN	21.0719	22.6689	23.0032	NaN	23.6902	22.2176	24.0337	25.9713	24.2494							7	7	7	16.8	16.8	16.8	45.107	0	28.712	1535200000	23	20	66747000	1.39558	0.126303	2.32938	2.60819	Q8L960	Q8L960		SVR1	2607	sp|Q8L960|SVR1_ARATH Putative ribosomal large subunit pseudouridine synthase SVR1, chloroplastic OS=Arabidopsis thaliana OX=3702 GN=SVR1 PE=1 SV=1	AT2G39140
NaN	NaN	NaN	25.9438	25.391	25.6966	NaN	26.1734	25.9873	25.6882	26.4217	25.1573							8	8	8	43.3	43.3	43.3	30.907	0	68.516	5487100000	13	47	422080000	0.022426	1	-0.0238647	-0.0658027	Q8L9A0	Q8L9A0	50S ribosomal protein L21, mitochondrial	RPL21M	2609	sp|Q8L9A0|RM21_ARATH 50S ribosomal protein L21, mitochondrial OS=Arabidopsis thaliana OX=3702 GN=RPL21M PE=1 SV=1	AT4G30930
29.0805	28.8779	28.6729	29.2829	29.1382	29.3603	28.4674	29.062	29.1394	28.8732	28.8338	28.8055					+	AP1_WT_ELUATE_AP1_WT_INPUT	22	22	22	67.3	67.3	67.3	35.761	0	247.93	49882000000	18	336	2771200000	2.04503	0.0358552	-0.352987	-3.23038	Q8L9C4	Q8L9C4	Very-long-chain 3-oxoacyl-CoA reductase 1	KCR1	2611	sp|Q8L9C4|KCR1_ARATH Very-long-chain 3-oxoacyl-CoA reductase 1 OS=Arabidopsis thaliana OX=3702 GN=KCR1 PE=1 SV=1	AT1G67730
25.048	24.7864	24.3951	22.7969	22.303	22.1261	25.2116	21.7992	22.9067	22.4651	24.911	25.3851					+	AP1_WT_ELUATE_AP1_WT_INPUT	2	2	2	37.3	37.3	37.3	8.3509	0	6.8533	1464900000	3	38	488310000	6.38253	2.55498e-05	2.5567	11.561	Q8L9R6	Q8L9R6		At1g68680	2614	tr|Q8L9R6|Q8L9R6_ARATH At1g68680 OS=Arabidopsis thaliana OX=3702 GN=At1g68680 PE=1 SV=1	AT1G68680
28.9434	28.8958	28.4794	30.4301	30.5535	30.5445	29.0864	30.1042	29.8002	30.3125	28.6338	29.2669					+	AP1_WT_ELUATE_AP1_WT_INPUT	22	22	22	50.1	50.1	50.1	53.4	0	323.31	103320000000	25	414	4132700000	5.10388	0.000173697	-1.40656	-8.37416	Q8L9Y0	Q8L9Y0	Serine carboxypeptidase-like 25	SCPL25	2616	sp|Q8L9Y0|SCP25_ARATH Serine carboxypeptidase-like 25 OS=Arabidopsis thaliana OX=3702 GN=SCPL25 PE=2 SV=2	AT3G02110
26.955	26.9038	26.4472	25.7138	26.1103	25.7832	26.7681	26.1705	25.8469	26.4231	27.1352	26.4556					+	AP1_WT_ELUATE_AP1_WT_INPUT	24	14	14	50	31.7	31.7	66.025	0	124.1	7700900000	30	95	256700000	3.16218	0.00430694	0.769509	4.8333	Q8LA13	Q8LA13	DEAD-box ATP-dependent RNA helicase 11	RH11	2617	sp|Q8LA13|RH11_ARATH DEAD-box ATP-dependent RNA helicase 11 OS=Arabidopsis thaliana OX=3702 GN=RH11 PE=1 SV=1	AT3G58510
26.4951	NaN	27.1233	25.3289	25.3383	26.3892	27.871	25.2233	25.9608	26.2513	27.9996	27.8336					+	AP1_WT_ELUATE_AP1_WT_INPUT	4	4	3	19	19	15.1	28.285	0	62.238	7881000000	9	79	875670000	3.09014	0.00495503	1.71589	4.9307	Q8LA16	Q8LA16	PHD finger protein ALFIN-LIKE 7	AL7	2618	sp|Q8LA16|ALFL7_ARATH PHD finger protein ALFIN-LIKE 7 OS=Arabidopsis thaliana OX=3702 GN=AL7 PE=1 SV=1	AT1G14510
NaN	24.3416	NaN	27.0744	27.1571	27.2954	NaN	26.95	26.7066	26.4629	25.1067	23.7394					+	AP1_WT_ELUATE_AP1_WT_INPUT	8	6	6	49.1	33.4	33.4	30.646	0	29.098	6184800000	9	56	687200000	4.04426	0.000900388	-2.54514	-8.01157	Q8LAA6	Q8LAA6	Probable aquaporin PIP1-5	PIP1-5	2620	sp|Q8LAA6|PIP15_ARATH Probable aquaporin PIP1-5 OS=Arabidopsis thaliana OX=3702 GN=PIP1-5 PE=1 SV=2	AT4G23400
NaN	NaN	NaN	26.9714	26.5701	26.6037	NaN	25.9595	26.1546	26.2321	25.7774	25.3235							12	12	12	26.8	26.8	26.8	57.419	0	51.534	7494700000	23	87	325860000	1.58339	0.0872654	-0.864763	-2.93555	Q8LAF4	Q8LAF4		At1g73240	2623	tr|Q8LAF4|Q8LAF4_ARATH Nucleoporin protein Ndc1-Nup protein OS=Arabidopsis thaliana OX=3702 GN=At1g73240 PE=1 SV=1	AT1G73240
26.8884	27.0314	27.9463	28.0538	28.1447	28.3732	27.3303	27.8748	27.5607	27.8137	27.8809	27.0147							10	7	7	32.6	27.9	27.9	39.818	0	73.142	13962000000	12	105	1163500000	1.73447	0.0650329	-0.621464	-2.81141	Q8LAR0	Q8LAR0		At4g32460	2628	tr|Q8LAR0|Q8LAR0_ARATH At4g32460 OS=Arabidopsis thaliana OX=3702 GN=At4g32460 PE=1 SV=1	AT4G32460
25.5342	NaN	NaN	25.1576	25.0773	24.8198	NaN	24.4509	25.2413	25.1882	26.8121	25.634							10	10	10	51.4	51.4	51.4	31.655	0	27.265	3829700000	15	25	255310000	1.76215	0.0617397	1.00425	3.10124	Q8LAS8	Q8LAS8	S-formylglutathione hydrolase	SFGH	2631	sp|Q8LAS8|SFGH_ARATH S-formylglutathione hydrolase OS=Arabidopsis thaliana OX=3702 GN=SFGH PE=1 SV=2	AT2G41530
26.0476	NaN	NaN	25.7324	26.0292	26.1982	25.5412	25.7203	25.974	26.2648	25.6784	26.4115							8	8	8	30.9	30.9	30.9	40.359	0	170.6	5320700000	16	89	332540000	0.131423	1	-0.0668111	-0.345144	Q8LB81	Q8LB81	GDSL esterase/lipase At5g33370		2637	sp|Q8LB81|GDL79_ARATH GDSL esterase/lipase At5g33370 OS=Arabidopsis thaliana OX=3702 GN=At5g33370 PE=2 SV=1	AT5G33370
27.7021	27.5882	28.1288	28.4875	28.1716	28.0163	28.2317	28.6237	28.7187	28.6978	29.1029	28.1181							21	4	4	67.4	4.7	4.7	34.358	0	156.78	40190000000	10	151	4019000000	0.609571	0.595394	-0.307307	-1.23317	Q8LBI1	Q8LBI1	60S ribosomal protein L5-1	ATL5	2639	sp|Q8LBI1|RL51_ARATH 60S ribosomal protein L5-1 OS=Arabidopsis thaliana OX=3702 GN=RPL5A PE=1 SV=2	AT3G25520
NaN	NaN	NaN	25.7395	27.1172	26.8235	24.6175	26.9745	27.7817	26.5756	25.6941	24.944					+	AP1_WT_ELUATE_AP1_WT_INPUT	10	10	3	45.5	45.5	22.2	31.171	0	61.768	7263500000	14	91	518820000	2.20894	0.0260672	-1.75014	-3.8638	Q8LBZ7	Q8LBZ7	Succinate dehydrogenase [ubiquinone] iron-sulfur subunit 1, mitochondrial	SDH2-1	2642	sp|Q8LBZ7|SDHB1_ARATH Succinate dehydrogenase [ubiquinone] iron-sulfur subunit 1, mitochondrial OS=Arabidopsis thaliana OX=3702 GN=SDH2-1 PE=1 SV=2	AT3G27380
23.4546	NaN	NaN	22.2551	22.5133	21.767	NaN	22.1042	22.3567	22.1922	23.3129	NaN					+	AP1_WT_ELUATE_AP1_WT_INPUT	2	2	2	13.4	13.4	13.4	29.861	0	4.2147	348520000	12	12	29044000	3.07914	0.00504133	1.18566	6.16886	Q8LC42	Q8LC42		At1g05430	2644	tr|Q8LC42|Q8LC42_ARATH Uncharacterized protein At1g05430 OS=Arabidopsis thaliana OX=3702 GN=At1g05430 PE=1 SV=1	AT1G05430
31.2279	31.1735	31.5026	30.2231	29.5831	29.4544	31.1369	29.9762	29.4529	29.8317	31.6675	30.9296					+	AP1_WT_ELUATE_AP1_WT_INPUT	6	6	4	31.6	31.6	22.6	15.419	0	216.11	112540000000	4	321	28135000000	5.41371	0.000102995	1.51942	9.07052	Q8LC83	Q8LC83	40S ribosomal protein S24-2	RPS24B	2645	sp|Q8LC83|RS242_ARATH 40S ribosomal protein S24-2 OS=Arabidopsis thaliana OX=3702 GN=RPS24B PE=2 SV=2	AT5G28060
24.1198	25.1813	24.6237	25.508	26.0212	25.2104	25.4161	25.5187	25.1948	25.6056	27.2609	26.5776							17	11	5	56.2	46.1	29.8	39.207	0	159.79	4060100000	14	109	290000000	0.0138216	1	0.0201286	0.0402633	Q8LCE1	Q8LCE1	Glutamine synthetase cytosolic isozyme 1-2	GLN1-2	2649	sp|Q8LCE1|GLN12_ARATH Glutamine synthetase cytosolic isozyme 1-2 OS=Arabidopsis thaliana OX=3702 GN=GLN1-2 PE=1 SV=2	AT1G66200
31.8021	31.9488	31.5919	30.8764	30.5662	30.7315	31.3828	30.6879	30.4599	30.5533	32.3475	31.6306					+	AP1_WT_ELUATE_AP1_WT_INPUT	10	10	7	42.2	42.2	28.1	15.614	0	87.275	202210000000	6	337	33702000000	4.72045	0.000319174	1.1381	7.57023	Q8LCL3;Q9SKX8	Q8LCL3	60S ribosomal protein L27-2	RPL27B	2651	sp|Q8LCL3|RL272_ARATH 60S ribosomal protein L27-2 OS=Arabidopsis thaliana OX=3702 GN=RPL27B PE=2 SV=2	AT3G22230
NaN	24.302	NaN	27.4472	27.1466	27.9852	NaN	26.9299	27.0559	26.8251	25.2607	24.4466					+	AP1_WT_ELUATE_AP1_WT_INPUT	14	14	13	31.2	31.2	29.5	57.868	0	193.06	10899000000	23	155	473870000	4.03314	0.000911738	-2.56183	-7.97952	Q8LCP6	Q8LCP6	Endoglucanase 10		2653	sp|Q8LCP6|GUN10_ARATH Endoglucanase 10 OS=Arabidopsis thaliana OX=3702 GN=At1g75680 PE=2 SV=2	AT1G75680
29.7532	28.971	NaN	29.3659	29.2202	28.74	28.6897	28.6361	28.4178	28.7727	29.4117	29.8804							8	8	3	95.5	95.5	50	11.162	0	323.31	55454000000	3	353	18485000000	1.00727	0.26931	0.482365	1.84365	Q8LCW9	Q8LCW9	60S acidic ribosomal protein P1-1	RPP1A	2656	sp|Q8LCW9|RLA11_ARATH 60S acidic ribosomal protein P1-1 OS=Arabidopsis thaliana OX=3702 GN=RPP1A PE=3 SV=2	AT1G01100
30.7828	30.5761	31.4183	29.8088	29.4028	29.5131	30.3695	30.1557	30.2469	30.1629	30.8199	30.2482					+	AP1_WT_ELUATE_AP1_WT_INPUT	21	21	18	69.5	69.5	64.7	22.06	0	323.31	105890000000	8	582	13236000000	2.3444	0.0201573	0.820743	3.6416	Q8LD03	Q8LD03	40S ribosomal protein S7-3	RPS7C	2657	sp|Q8LD03|RS73_ARATH 40S ribosomal protein S7-3 OS=Arabidopsis thaliana OX=3702 GN=RPS7C PE=1 SV=2	AT5G16130
NaN	NaN	NaN	26.358	27.0873	26.6572	NaN	26.2225	26.3171	26.0784	25.197	25.1653					+	AP1_WT_ELUATE_AP1_WT_INPUT	10	10	10	56.2	56.2	56.2	25.151	0	229.32	6887700000	13	77	529830000	2.46848	0.0158381	-1.27226	-4.67875	Q8LD27	Q8LD27	Proteasome subunit beta type-6	PBA1	2658	sp|Q8LD27|PSB6_ARATH Proteasome subunit beta type-6 OS=Arabidopsis thaliana OX=3702 GN=PBA1 PE=1 SV=2	AT4G31300
31.8341	31.842	31.908	31.0835	29.8706	30.7225	30.7747	31.3296	31.3182	31.251	32.4334	31.7688							15	15	15	53.2	53.2	53.2	17.396	0	316.81	272420000000	5	707	54484000000	1.578	0.0879815	0.830957	2.60149	Q9M3C3;Q8LD46	Q9M3C3;Q8LD46	60S ribosomal protein L23a-2;60S ribosomal protein L23a-1	RPL23AB;RPL23AA	2659	sp|Q9M3C3|R23A2_ARATH 60S ribosomal protein L23a-2 OS=Arabidopsis thaliana OX=3702 GN=RPL23AB PE=2 SV=1;sp|Q8LD46|R23A1_ARATH 60S ribosomal protein L23a-1 OS=Arabidopsis thaliana OX=3702 GN=RPL23AA PE=2 SV=2	AT2G39460;AT3G55280
25.835	25.4014	NaN	26.1936	25.9147	25.9883	25.5891	25.8617	25.5648	25.871	25.5674	25.2894							9	9	8	26.2	26.2	23	45.757	0	38.389	5973600000	22	88	271530000	1.76181	0.0617397	-0.362573	-2.9102	Q8LE47	Q8LE47	Pentatricopeptide repeat-containing protein At1g61870, mitochondrial	PPR336	2672	sp|Q8LE47|PPR87_ARATH Pentatricopeptide repeat-containing protein At1g61870, mitochondrial OS=Arabidopsis thaliana OX=3702 GN=PPR336 PE=2 SV=2	AT1G61870
25.9959	26.3544	NaN	27.9495	27.6044	27.098	26.6183	27.4605	26.4833	26.9485	27.5854	26.3338							8	3	3	95.6	50.4	50.4	11.247	0	108.01	21086000000	3	118	7028600000	1.11846	0.216358	-0.679768	-2.00346	Q8LEQ0	Q8LEQ0	60S acidic ribosomal protein P1-3	RPP1C	2677	sp|Q8LEQ0|RLA13_ARATH 60S acidic ribosomal protein P1-3 OS=Arabidopsis thaliana OX=3702 GN=RPP1C PE=1 SV=2	AT5G47700
NaN	NaN	NaN	24.3884	24.298	24.0458	25.1358	24.6892	24.3081	24.1144	24.7886	24.8208					+	AP1_WT_ELUATE_AP1_WT_INPUT	5	5	5	34.2	34.2	34.2	18.759	0	7.1677	2149300000	8	13	268670000	2.25614	0.0239566	0.607778	3.94824	Q8LEZ8;O23685	Q8LEZ8;O23685	AP-1 complex subunit sigma-1;AP-1 complex subunit sigma-2	AAP19-1;AAP19-2	2680	sp|Q8LEZ8|AP1S1_ARATH AP-1 complex subunit sigma-1 OS=Arabidopsis thaliana OX=3702 GN=AAP19-1 PE=1 SV=1;sp|O23685|AP1S2_ARATH AP-1 complex subunit sigma-2 OS=Arabidopsis thaliana OX=3702 GN=AAP19-2 PE=2 SV=1	AT2G17380;AT4G35410
NaN	24.2019	NaN	27.2835	26.6012	26.7447	24.6076	26.9174	27.1686	27.2894	NaN	25.3562					+	AP1_WT_ELUATE_AP1_WT_INPUT	16	16	11	35.4	35.4	26.5	72.083	0	72.79	9353800000	37	69	252810000	4.07332	0.000861498	-2.27891	-8.0959	Q8LF20	Q8LF20	Putative clathrin assembly protein At2g25430		2682	sp|Q8LF20|CAP2_ARATH Putative clathrin assembly protein At2g25430 OS=Arabidopsis thaliana OX=3702 GN=At2g25430 PE=1 SV=2	AT2G25430
29.6985	29.6793	29.7584	30.4869	30.6083	30.6796	30.6653	30.201	30.0969	30.285	29.1951	30.1875							54	54	43	84.2	84.2	72.8	68.722	0	323.31	117430000000	37	973	3173700000	1.37935	0.130025	-0.528924	-2.33421	Q8LF21	Q8LF21	Dynamin-related protein 1C	DRP1C	2683	sp|Q8LF21|DRP1C_ARATH Phragmoplastin DRP1C OS=Arabidopsis thaliana OX=3702 GN=DRP1C PE=1 SV=2	AT1G14830
NaN	NaN	NaN	22.4591	22.1503	22.4949	24.5707	21.9782	25.2198	21.8532	25.2523	NaN							4	4	4	70.4	70.4	70.4	8.3146	0	11.633	1802800000	3	16	600920000	1.22683	0.176241	2.21895	2.32163	Q8LFJ6;Q9SYA6	Q8LFJ6	DNA-directed RNA polymerases II, IV and V subunit 10	NRPB10	2689	sp|Q8LFJ6|NRPBA_ARATH DNA-directed RNA polymerases II, IV and V subunit 10 OS=Arabidopsis thaliana OX=3702 GN=NRPB10 PE=1 SV=1	AT1G11475
NaN	NaN	NaN	27.7208	27.721	27.8263	NaN	28.1997	28.1701	28.3915	26.1064	24.2782					+	AP1_WT_ELUATE_AP1_WT_INPUT	34	34	26	51.7	51.7	41.2	86.643	0	105.57	23387000000	55	195	425220000	2.9589	0.00636477	-2.81256	-5.85188	Q8LFT2	Q8LFT2	Dynamin-related protein 3B	DRP3B	2694	sp|Q8LFT2|DRP3B_ARATH Dynamin-related protein 3B OS=Arabidopsis thaliana OX=3702 GN=DRP3B PE=1 SV=2	AT2G14120
NaN	NaN	NaN	28.9508	28.5677	28.4291	NaN	28.729	28.0989	29.1938	27.333	23.6402				GeBP	+	AP1_WT_ELUATE_AP1_WT_INPUT	13	13	11	43.8	43.8	38	38.186	0	323.31	47603000000	16	183	2975200000	1.87182	0.0498337	-3.17496	-3.46207	Q8LG05;C0SUU6	Q8LG05		At4g00238	2696	sp|Q8LG05|STKLM_ARATH Transcription factor STKL1 OS=Arabidopsis thaliana OX=3702 GN=STKL1 PE=1 SV=1	AT4G00238
25.0941	NaN	NaN	26.0565	26.3308	26.8783	24.5278	26.3847	26.6455	26.0286	25.7921	25.4625					+	AP1_WT_ELUATE_AP1_WT_INPUT	12	12	12	41.4	41.4	41.4	43.676	0	53.087	6537900000	18	99	363220000	2.57093	0.0131835	-1.16827	-4.28048	Q8LG50	Q8LG50	1-acyl-sn-glycerol-3-phosphate acyltransferase 2	LPAT2	2697	sp|Q8LG50|LPAT2_ARATH 1-acyl-sn-glycerol-3-phosphate acyltransferase 2 OS=Arabidopsis thaliana OX=3702 GN=LPAT2 PE=1 SV=2	AT3G57650
NaN	NaN	NaN	27.8591	27.8956	27.9932	26.1485	27.7953	28.484	27.4125	26.6337	25.2915					+	AP1_WT_ELUATE_AP1_WT_INPUT	24	24	23	79.5	79.5	78	49.68	0	323.31	15232000000	28	165	544010000	3.13583	0.00453573	-1.88206	-5.70517	Q8LGI2	Q8LGI2	Probable mitochondrial saccharopine dehydrogenase-like oxidoreductase At5g39410		2704	sp|Q8LGI2|SCPDL_ARATH Probable mitochondrial saccharopine dehydrogenase-like oxidoreductase At5g39410 OS=Arabidopsis thaliana OX=3702 GN=At5g39410 PE=1 SV=2	AT5G39410
NaN	NaN	NaN	26.4702	22.1446	26.1722	27.248	26.2477	21.8618	26.1206	27.5004	NaN							4	4	4	4.8	4.8	4.8	136.48	0.0070592	1.6359	8218400000	64	19	128410000	0.76245	0.442239	2.53797	1.5471	Q8LL04	Q8LL04	RNA polymerase II C-terminal domain phosphatase-like 3	CPL3	2708	sp|Q8LL04|CPL3_ARATH RNA polymerase II C-terminal domain phosphatase-like 3 OS=Arabidopsis thaliana OX=3702 GN=CPL3 PE=1 SV=2	AT2G33540
NaN	NaN	25.3359	27.0557	27.706	27.376	NaN	27.8982	27.8554	28.5125	25.3613	23.8928					+	AP1_WT_ELUATE_AP1_WT_INPUT	28	28	28	34.9	34.9	34.9	119.15	0	323.31	23985000000	58	243	413530000	3.5159	0.00231939	-2.8706	-6.59804	Q8LLD0	Q8LLD0	Nuclear pore complex protein NUP96	NUP96	2709	sp|Q8LLD0|NUP96_ARATH Nuclear pore complex protein NUP96 OS=Arabidopsis thaliana OX=3702 GN=NUP96 PE=1 SV=1	AT1G80680
27	26.9675	26.7575	26.3698	26.3435	26.433	27.352	26.3253	26.4585	25.9656	27.0113	27.1624					+	AP1_WT_ELUATE_AP1_WT_INPUT	13	13	13	35.6	35.6	35.6	40.042	0	44.879	8058400000	21	81	383740000	4.22855	0.000671189	0.725834	6.62263	Q8LPF3	Q8LPF3	Probable pectinesterase 68	PME68	2712	sp|Q8LPF3|PME68_ARATH Probable pectinesterase 68 OS=Arabidopsis thaliana OX=3702 GN=PME68 PE=2 SV=1	AT5G47500
25.4058	25.4672	NaN	24.6801	24.5327	25.1334	25.795	22.9044	23.8646	24.4645	24.8495	25.3049							8	8	8	17.8	17.8	17.8	74.281	0	26.653	2598200000	33	42	78732000	1.76145	0.0617397	1.10122	2.90969	Q8LPG9	Q8LPG9	Protein IQ-DOMAIN 14	IQD14	2713	sp|Q8LPG9|IQD14_ARATH Protein IQ-DOMAIN 14 OS=Arabidopsis thaliana OX=3702 GN=IQD14 PE=1 SV=1	AT2G43680
NaN	NaN	NaN	26.1973	26.4905	26.0565	NaN	26.1582	26.0862	26.2219	26.1901	25.9907							12	12	12	16.6	16.6	16.6	115.9	0	32.232	6838800000	46	81	148670000	0.391135	0.925194	-0.111358	-0.892857	Q8LPJ3	Q8LPJ3	Alpha-mannosidase	At5g13980	2714	sp|Q8LPJ3|MANA2_ARATH Probable alpha-mannosidase At5g13980 OS=Arabidopsis thaliana OX=3702 GN=At5g13980 PE=2 SV=1	AT5G13980
25.8103	26.1274	24.6938	26.6402	26.7466	26.7363	26.5831	26.8336	27.1745	26.5407	26.9631	26.892							18	18	18	39.3	39.3	39.3	68.389	0	148.82	10564000000	29	126	364280000	0.901278	0.333454	-0.600385	-1.67176	Q8LPJ4	Q8LPJ4	ABC transporter E family member 2	ABCE2	2715	sp|Q8LPJ4|AB2E_ARATH ABC transporter E family member 2 OS=Arabidopsis thaliana OX=3702 GN=ABCE2 PE=2 SV=1	AT4G19210
24.7945	NaN	25.6153	27.7294	27.8937	28.3341	24.2402	28.2626	27.6066	27.7457	26.8196	26.8386					+	AP1_WT_ELUATE_AP1_WT_INPUT	35	34	34	36.8	35.5	35.5	139.91	0	323.31	15621000000	57	227	274050000	2.89095	0.00715611	-2.26706	-4.60278	Q8LPK2;Q9SGY1	Q8LPK2	ABC transporter B family member 2	ABCB2	2718	sp|Q8LPK2|AB2B_ARATH ABC transporter B family member 2 OS=Arabidopsis thaliana OX=3702 GN=ABCB2 PE=1 SV=3	AT4G25960
NaN	NaN	NaN	26.8767	26.6487	27.0145	NaN	26.4528	26.8032	26.7613	26.1796	26.0339					+	AP1_WT_ELUATE_AP1_WT_INPUT	28	28	2	42.1	42.1	5.1	112.3	0	265.33	9955200000	52	111	191450000	2.34279	0.0201894	-0.65274	-4.40544	Q8LPK4	Q8LPK4	AP-2 complex subunit alpha-2	ALPHAC-AD	2719	sp|Q8LPK4|AP2A2_ARATH AP-2 complex subunit alpha-2 OS=Arabidopsis thaliana OX=3702 GN=ALPHAC-AD PE=1 SV=1	AT5G22780
25.1145	NaN	NaN	26.3396	25.7573	25.5956	NaN	25.4698	25.6292	25.6487	25.1763	25.3944							5	5	5	19.4	19.4	19.4	38.311	0	8.1929	4676500000	11	19	425140000	1.48921	0.104455	-0.511613	-2.66104	Q8LPN5	Q8LPN5	AT-hook motif nuclear-localized protein 12	AHL12	2725	sp|Q8LPN5|AHL12_ARATH AT-hook motif nuclear-localized protein 12 OS=Arabidopsis thaliana OX=3702 GN=AHL12 PE=1 SV=1	AT1G63480
[truncated: 1,123 more rows]

## Sheet: AP1tetELUATE_vs_AP1tetINPUT
Supplementary Table 1B. Output of the Perseus data post processing. Data used to plot Fig 1F.
[truncated: 1,974 more rows]

## Sheet: AP1wtELUATE_vs_AP1tetELUATE
Supplementary Table 1C. Output of the Perseus data post processing. Data used to plot Fig 1G.
[truncated: 1,672 more rows]

## Sheet: AP1wtEL_vs_AP1tetEL_p-val=1
Supplementary Table 1D. Output of the Perseus data post processing. Proteins present either in AP1wt ELUATE or in AP1tet ELUATE (in at least 2 biological replicates) but not present (or not with 2 biological replicates) in both AP1wt ELUATE and AP1tet ELUATE.
[truncated: 321 more rows]
