# Supplementary material for: AP1 is a pioneer transcription factor that programmes cell fate through MADS-domain protein tetramerisation
Source: Genome Biol. 2025 Dec 9;26:418. doi: 10.1186/s13059-025-03884-0 (PMC12687491; doi:10.1186/s13059-025-03884-0)
Supplement: Supplementary file 5 — Additional file 5: Table S4. Results of ATAC-seq peak calling using HMMRATAC. [file 13059_2025_3884_MOESM5_ESM.xlsx]

## Sheet: HMMRATAC peaks
Results of ATAC-seq peak calling using HMMRATAC.
Chr	start	end	state
1	0	1380	E1
1	1380	1730	E2
1	1730	2090	E1
1	2090	3540	E2
1	3540	6540	E1
1	6540	6660	E2
1	6660	8640	E1
1	8640	8990	E2
1	8990	9720	E1
1	9720	9790	E2
1	9790	13490	E1
1	13490	14320	E2
1	14320	14870	E1
1	14870	15250	E2
1	15250	15480	E1
1	15480	15540	E2
1	15540	16510	E1
1	16510	16980	E2
1	16980	18120	E1
1	18120	18220	E0
1	18220	18300	E1
1	18300	18320	E0
1	18320	18950	E1
1	18950	19110	E2
1	19110	19410	E1
1	19410	19470	E2
1	19470	20210	E1
1	20210	21650	E2
1	21650	22360	E1
1	22360	22450	E2
1	22450	22650	E1
1	22650	23190	E2
1	23190	30900	E1
1	30900	31000	E2
1	31000	33080	E1
1	33080	33940	E2
1	33940	37800	E1
1	37800	38500	E2
1	38500	39590	E1
1	39590	39700	E2
1	39700	44930	E1
1	44930	45110	E2
1	45110	46750	E1
1	46750	47040	E2
1	47040	49250	E1
1	49250	49390	E2
1	49390	49750	E1
1	49750	50290	E2
1	50290	51150	E1
1	51150	52150	E2
1	52150	52740	E1
1	52740	52820	E2
1	52820	55070	E1
1	55070	55750	E2
1	55750	56000	E1
1	56000	56040	E0
1	56040	56480	E1
1	56480	57610	E2
1	57610	58680	E1
1	58680	58810	E2
1	58810	59140	E1
1	59140	62230	E2
1	62230	62470	E1
1	62470	62630	E2
1	62630	63000	E1
1	63000	63200	E2
1	63200	63800	E1
1	63800	64770	E2
1	64770	67200	E1
1	67200	67260	E2
1	67260	67570	E1
1	67570	69190	E2
1	69190	72080	E1
1	72080	72460	E2
1	72460	73920	E1
1	73920	74070	E2
1	74070	74650	E1
1	74650	75590	E2
1	75590	76130	E1
1	76130	76610	E2
1	76610	77080	E1
1	77080	77150	E2
1	77150	77520	E1
1	77520	77850	E2
1	77850	78220	E1
1	78220	78310	E2
1	78310	79130	E1
1	79130	79240	E2
1	79240	79610	E1
1	79610	79770	E2
1	79770	80590	E1
1	80590	80650	E2
1	80650	81050	E1
1	81050	81160	E2
1	81160	81690	E1
1	81690	82170	E2
1	82170	83050	E1
1	83050	83620	E2
1	83620	85460	E1
1	85460	85640	E2
1	85640	86540	E1
1	86540	86760	E2
1	86760	88190	E1
1	88190	88360	E2
1	88360	88520	E1
1	88520	88950	E2
1	88950	91250	E1
1	91250	91650	E2
1	91650	95490	E1
1	95490	96010	E2
1	96010	97310	E1
1	97310	97470	E2
1	97470	99140	E1
1	99140	100000	E2
1	100000	101880	E1
1	101880	102010	E2
1	102010	102780	E1
1	102780	102990	E2
1	102990	103690	E1
1	103690	104270	E2
1	104270	104560	E1
1	104560	104760	E2
1	104760	105320	E1
1	105320	105500	E2
1	105500	106070	E1
1	106070	106470	E2
1	106470	107420	E1
1	107420	109100	E2
1	109100	111630	E1
1	111630	112990	E2
1	112990	113960	E1
1	113960	114280	E2
1	114280	115690	E1
1	115690	117120	E2
1	117120	118300	E1
1	118300	119110	E2
1	119110	120440	E1
1	120440	121760	E2
1	121760	128330	E1
1	128330	128620	E2
1	128620	128970	E1
1	128970	129070	E2
1	129070	129200	E1
1	129200	129560	E2
1	129560	130410	E1
1	130410	131960	E2
1	131960	135830	E1
1	135830	136190	E2
1	136190	138060	E1
1	138060	138460	E2
1	138460	139890	E1
1	139890	140650	E2
1	140650	141790	E1
1	141790	142060	E2
1	142060	143160	E1
1	143160	143580	E2
1	143580	145750	E1
1	145750	146550	E2
1	146550	147940	E1
1	147940	148060	E2
1	148060	149080	E1
1	149080	149630	E2
1	149630	154940	E1
1	154940	154990	E2
1	154990	155200	E1
1	155200	157180	E2
1	157180	158610	E1
1	158610	159940	E2
1	159940	162220	E1
1	162220	162250	E0
1	162250	162740	E1
1	162740	163420	E2
1	163420	165010	E1
1	165010	165020	E0
1	165020	167130	E1
1	167130	167310	E2
1	167310	167900	E1
1	167900	168580	E2
1	168580	171410	E1
1	171410	171620	E2
1	171620	172010	E1
1	172010	172210	E2
1	172210	172500	E1
1	172500	173920	E2
1	173920	174120	E1
1	174120	174190	E2
1	174190	174670	E1
1	174670	175180	E2
1	175180	175670	E1
1	175670	176120	E2
1	176120	176820	E1
1	176820	177390	E2
1	177390	178780	E1
1	178780	180570	E2
1	180570	181920	E1
1	181920	182020	E2
1	182020	182150	E1
1	182150	185180	E2
1	185180	186740	E1
1	186740	187240	E2
1	187240	190130	E1
1	190130	190560	E2
1	190560	192340	E1
1	192340	192650	E2
1	192650	194100	E1
1	194100	195960	E2
1	195960	198190	E1
1	198190	199880	E2
1	199880	201470	E1
1	201470	202220	E2
1	202220	204180	E1
1	204180	204770	E2
1	204770	204860	E1
1	204860	204980	E2
1	204980	205400	E1
1	205400	205500	E2
1	205500	206390	E1
1	206390	208490	E2
1	208490	209190	E1
1	209190	209270	E2
1	209270	210530	E1
1	210530	211070	E2
1	211070	211350	E1
1	211350	211430	E2
1	211430	212670	E1
1	212670	212970	E2
1	212970	215190	E1
1	215190	215360	E2
1	215360	217430	E1
1	217430	217570	E2
1	217570	217880	E1
1	217880	218020	E2
1	218020	218680	E1
1	218680	219020	E2
1	219020	219390	E1
1	219390	220410	E2
1	220410	223180	E1
1	223180	223420	E2
1	223420	224380	E1
1	224380	226250	E2
1	226250	227220	E1
1	227220	229140	E2
1	229140	230590	E1
1	230590	230790	E2
1	230790	232460	E1
1	232460	232930	E2
1	232930	237700	E1
1	237700	238190	E2
1	238190	239400	E1
1	239400	240000	E2
1	240000	245950	E1
1	245950	246210	E2
1	246210	248380	E1
1	248380	249170	E2
1	249170	250870	E1
1	250870	250880	E0
1	250880	254500	E1
1	254500	255370	E2
1	255370	258310	E1
1	258310	258380	E0
1	258380	258710	E1
1	258710	258790	E2
1	258790	262060	E1
1	262060	262180	E2
1	262180	262510	E1
1	262510	262910	E2
1	262910	266040	E1
1	266040	266480	E2
1	266480	267830	E1
1	267830	268470	E2
1	268470	269350	E1
1	269350	270150	E2
1	270150	270600	E1
1	270600	270970	E2
1	270970	274650	E1
1	274650	275350	E2
1	275350	278480	E1
1	278480	278660	E2
1	278660	284160	E1
1	284160	284510	E2
1	284510	291000	E1
1	291000	291890	E2
1	291890	292850	E1
1	292850	293430	E2
1	293430	294910	E1
1	294910	295250	E2
1	295250	295860	E1
1	295860	296040	E2
1	296040	298070	E1
1	298070	298740	E2
1	298740	300800	E1
1	300800	301380	E2
1	301380	302160	E1
1	302160	303630	E2
1	303630	306230	E1
1	306230	306540	E2
1	306540	309040	E1
1	309040	310350	E2
1	310350	315890	E1
1	315890	316180	E2
1	316180	319410	E1
1	319410	320020	E2
1	320020	322830	E1
1	322830	323040	E2
1	323040	324710	E1
1	324710	325420	E2
1	325420	337760	E1
1	337760	338340	E2
1	338340	342070	E1
1	342070	342670	E2
1	342670	344320	E1
1	344320	345780	E2
1	345780	354810	E1
1	354810	355030	E2
1	355030	356590	E1
1	356590	357490	E2
1	357490	358910	E1
1	358910	359110	E2
1	359110	359910	E1
1	359910	359950	E0
1	359950	363090	E1
1	363090	365190	E2
1	365190	367550	E1
1	367550	369030	E2
1	369030	369280	E1
1	369280	369710	E2
1	369710	369790	E1
1	369790	369960	E2
1	369960	371670	E1
1	371670	371900	E2
1	371900	372220	E1
1	372220	372320	E2
1	372320	372650	E1
1	372650	372750	E2
1	372750	373030	E1
1	373030	373610	E2
1	373610	386840	E1
1	386840	387230	E2
1	387230	389610	E1
1	389610	389870	E2
1	389870	392590	E1
1	392590	392920	E2
1	392920	395250	E1
1	395250	395770	E2
1	395770	400220	E1
1	400220	400360	E2
1	400360	401130	E1
1	401130	401290	E2
1	401290	401820	E1
1	401820	402220	E2
1	402220	404360	E1
1	404360	404620	E2
1	404620	408520	E1
1	408520	408770	E2
1	408770	410410	E1
1	410410	410900	E2
1	410900	411470	E1
1	411470	411870	E2
1	411870	414450	E1
1	414450	415130	E2
1	415130	418120	E1
1	418120	418780	E2
1	418780	420050	E1
1	420050	420420	E2
1	420420	424490	E1
1	424490	424930	E2
1	424930	426310	E1
1	426310	426970	E2
1	426970	428290	E1
1	428290	428600	E2
1	428600	430670	E1
1	430670	431360	E2
1	431360	431480	E1
1	431480	431490	E0
1	431490	431580	E1
1	431580	431710	E0
1	431710	433300	E1
1	433300	433390	E0
1	433390	434000	E1
1	434000	434850	E2
1	434850	436900	E1
1	436900	437540	E2
1	437540	439840	E1
1	439840	440210	E2
1	440210	442850	E1
1	442850	443200	E2
1	443200	446420	E1
1	446420	446710	E2
1	446710	447060	E1
1	447060	447240	E2
1	447240	447810	E1
1	447810	448140	E2
1	448140	450350	E1
1	450350	450580	E2
1	450580	452720	E1
1	452720	453330	E2
1	453330	455340	E1
1	455340	455760	E2
1	455760	458900	E1
1	458900	459630	E2
1	459630	460700	E1
1	460700	460820	E2
1	460820	461230	E1
1	461230	461920	E2
1	461920	463560	E1
1	463560	463910	E2
1	463910	464470	E1
1	464470	464570	E2
1	464570	467760	E1
1	467760	468200	E2
1	468200	468320	E1
1	468320	469840	E2
1	469840	471460	E1
1	471460	472710	E2
1	472710	473150	E1
1	473150	473850	E2
1	473850	474280	E1
1	474280	474780	E2
1	474780	476410	E1
1	476410	477120	E2
1	477120	478840	E1
1	478840	479300	E2
1	479300	479750	E1
1	479750	479960	E2
1	479960	480340	E1
1	480340	480410	E2
1	480410	480630	E1
1	480630	480890	E2
1	480890	482060	E1
1	482060	482190	E2
1	482190	482820	E1
1	482820	482870	E2
1	482870	483210	E1
1	483210	484730	E2
1	484730	485140	E1
1	485140	485240	E2
1	485240	485450	E1
1	485450	489190	E2
1	489190	490550	E1
1	490550	490970	E2
1	490970	492680	E1
1	492680	493600	E2
1	493600	497600	E1
1	497600	497670	E2
1	497670	498570	E1
1	498570	499160	E2
1	499160	499570	E1
1	499570	499640	E0
1	499640	501440	E1
1	501440	501940	E2
1	501940	502070	E1
1	502070	502160	E2
1	502160	504160	E1
1	504160	504380	E2
1	504380	505210	E1
1	505210	505370	E2
1	505370	505770	E1
1	505770	506010	E2
1	506010	506440	E1
1	506440	506520	E2
1	506520	507260	E1
1	507260	507480	E2
1	507480	509690	E1
1	509690	509810	E2
1	509810	511050	E1
1	511050	511410	E2
1	511410	513650	E1
1	513650	513840	E2
1	513840	515310	E1
1	515310	515980	E2
1	515980	516360	E1
1	516360	517340	E2
1	517340	517550	E1
1	517550	518330	E2
1	518330	520300	E1
1	520300	520470	E2
1	520470	521730	E1
1	521730	522760	E2
1	522760	525780	E1
1	525780	525790	E0
1	525790	527210	E1
1	527210	527260	E0
1	527260	531550	E1
1	531550	531670	E0
1	531670	533430	E1
1	533430	533650	E0
1	533650	536800	E1
1	536800	536840	E0
1	536840	537480	E1
1	537480	537940	E2
1	537940	540040	E1
1	540040	540160	E2
1	540160	541180	E1
1	541180	541280	E2
1	541280	543900	E1
1	543900	543970	E2
1	543970	544400	E1
1	544400	544660	E2
1	544660	545170	E1
1	545170	545360	E2
1	545360	550420	E1
1	550420	550500	E0
1	550500	552560	E1
1	552560	553860	E2
1	553860	554840	E1
1	554840	555380	E2
1	555380	555960	E1
1	555960	557290	E2
1	557290	558570	E1
1	558570	559020	E2
1	559020	559240	E1
1	559240	560910	E2
1	560910	562610	E1
1	562610	562730	E2
1	562730	562820	E1
1	562820	563160	E2
1	563160	563540	E1
1	563540	567580	E2
1	567580	568180	E1
1	568180	568640	E2
1	568640	569140	E1
1	569140	569360	E2
1	569360	570090	E1
1	570090	570560	E2
1	570560	570750	E1
1	570750	572500	E2
1	572500	574850	E1
1	574850	576480	E2
1	576480	580400	E1
1	580400	580690	E2
1	580690	581980	E1
1	581980	582160	E2
1	582160	583870	E1
1	583870	584280	E2
1	584280	588200	E1
1	588200	588280	E2
1	588280	590840	E1
1	590840	591440	E2
1	591440	591960	E1
1	591960	592010	E2
1	592010	593380	E1
1	593380	593570	E2
1	593570	594390	E1
1	594390	594540	E2
1	594540	597700	E1
1	597700	597720	E0
1	597720	598670	E1
1	598670	599130	E2
1	599130	602140	E1
1	602140	602600	E2
1	602600	606710	E1
1	606710	606890	E2
1	606890	607240	E1
1	607240	608100	E2
1	608100	609420	E1
1	609420	609720	E2
1	609720	612920	E1
1	612920	613010	E2
1	613010	614710	E1
1	614710	614860	E2
1	614860	616170	E1
1	616170	617400	E2
1	617400	618010	E1
1	618010	618300	E2
1	618300	620080	E1
1	620080	620270	E2
1	620270	620510	E1
1	620510	621600	E2
1	621600	622900	E1
1	622900	623550	E2
1	623550	625650	E1
1	625650	626070	E2
1	626070	626530	E1
1	626530	626810	E2
1	626810	629920	E1
1	629920	630530	E2
1	630530	633280	E1
1	633280	633930	E2
1	633930	634620	E1
1	634620	635280	E2
1	635280	638640	E1
1	638640	639110	E2
1	639110	639950	E1
1	639950	639970	E0
1	639970	640180	E1
1	640180	640240	E0
1	640240	641410	E1
1	641410	641560	E2
1	641560	642710	E1
1	642710	643120	E2
1	643120	644500	E1
1	644500	645330	E2
1	645330	651930	E1
1	651930	653860	E2
1	653860	654320	E1
1	654320	654410	E2
1	654410	654800	E1
1	654800	654870	E2
1	654870	655270	E1
1	655270	655680	E2
1	655680	658160	E1
1	658160	658610	E2
1	658610	659740	E1
1	659740	660290	E2
1	660290	662190	E1
1	662190	662960	E2
1	662960	665170	E1
1	665170	665290	E2
1	665290	669790	E1
1	669790	670030	E2
1	670030	671230	E1
1	671230	671440	E2
1	671440	672720	E1
1	672720	673410	E2
1	673410	674960	E1
1	674960	674990	E0
1	674990	677160	E1
1	677160	677290	E2
1	677290	680810	E1
1	680810	680840	E0
1	680840	687410	E1
1	687410	687610	E2
1	687610	692580	E1
1	692580	692870	E2
1	692870	693830	E1
1	693830	693930	E2
1	693930	696350	E1
1	696350	696450	E2
1	696450	698560	E1
1	698560	698730	E2
1	698730	701100	E1
1	701100	701530	E2
1	701530	703850	E1
1	703850	703960	E2
1	703960	704590	E1
1	704590	704650	E2
1	704650	706530	E1
1	706530	707470	E2
1	707470	710450	E1
1	710450	710580	E2
1	710580	710830	E1
1	710830	710890	E2
1	710890	711840	E1
1	711840	712090	E2
1	712090	718060	E1
1	718060	718070	E0
1	718070	720460	E1
1	720460	720530	E0
1	720530	721430	E1
1	721430	721520	E0
1	721520	727330	E1
1	727330	729000	E2
1	729000	729680	E1
1	729680	729890	E2
1	729890	734580	E1
1	734580	734630	E2
1	734630	737510	E1
1	737510	739730	E2
1	739730	741920	E1
1	741920	742080	E2
1	742080	744240	E1
1	744240	744370	E2
1	744370	744500	E1
1	744500	744660	E2
1	744660	746590	E1
1	746590	746810	E2
1	746810	748050	E1
1	748050	748370	E2
1	748370	748930	E1
1	748930	749340	E2
1	749340	751940	E1
1	751940	752230	E2
1	752230	753160	E1
1	753160	753250	E2
1	753250	754140	E1
1	754140	754660	E2
1	754660	756250	E1
1	756250	756470	E2
1	756470	759780	E1
1	759780	760150	E0
1	760150	760510	E1
1	760510	761350	E2
1	761350	766740	E1
1	766740	767270	E2
1	767270	767480	E1
1	767480	768430	E2
1	768430	768570	E1
1	768570	768650	E2
1	768650	769510	E1
1	769510	769670	E2
1	769670	770730	E1
1	770730	770890	E2
1	770890	771340	E1
1	771340	771500	E2
1	771500	773050	E1
1	773050	773440	E2
1	773440	775310	E1
1	775310	775520	E2
1	775520	777010	E1
1	777010	777030	E0
1	777030	778540	E1
1	778540	778570	E0
1	778570	780120	E1
1	780120	780510	E2
1	780510	785430	E1
1	785430	787280	E2
1	787280	788200	E1
1	788200	788420	E2
1	788420	788820	E1
1	788820	789330	E2
1	789330	789680	E1
1	789680	790170	E2
1	790170	791050	E1
1	791050	791410	E2
1	791410	793040	E1
1	793040	793430	E2
1	793430	795290	E1
1	795290	795590	E2
1	795590	798450	E1
1	798450	799160	E2
1	799160	802710	E1
1	802710	803080	E2
1	803080	806990	E1
1	806990	807440	E2
1	807440	813110	E1
1	813110	813500	E2
1	813500	819370	E1
1	819370	819650	E2
1	819650	824350	E1
1	824350	824590	E2
1	824590	826300	E1
1	826300	826590	E2
1	826590	830160	E1
1	830160	830700	E2
1	830700	835390	E1
1	835390	835840	E2
1	835840	844140	E1
1	844140	844460	E2
1	844460	847620	E1
1	847620	847920	E2
1	847920	849660	E1
1	849660	851010	E2
1	851010	851340	E1
1	851340	852380	E2
1	852380	853420	E1
1	853420	854160	E2
1	854160	859740	E1
1	859740	859980	E2
1	859980	860530	E1
1	860530	860650	E2
1	860650	864130	E1
1	864130	865500	E2
1	865500	867730	E1
1	867730	869120	E2
1	869120	871150	E1
1	871150	871730	E2
1	871730	873340	E1
1	873340	873520	E2
1	873520	875830	E1
1	875830	876110	E2
1	876110	877540	E1
1	877540	877980	E2
1	877980	879940	E1
1	879940	880610	E2
1	880610	883480	E1
1	883480	883720	E2
1	883720	888040	E1
1	888040	888310	E2
1	888310	889950	E1
1	889950	890250	E2
1	890250	892390	E1
1	892390	893080	E2
1	893080	894200	E1
1	894200	894320	E2
1	894320	896460	E1
1	896460	896660	E2
1	896660	897370	E1
1	897370	898910	E2
1	898910	899620	E1
1	899620	901050	E2
1	901050	902610	E1
1	902610	904240	E2
1	904240	906610	E1
1	906610	906710	E2
1	906710	907140	E1
1	907140	907690	E2
1	907690	909430	E1
1	909430	909980	E2
1	909980	912210	E1
1	912210	912340	E2
1	912340	916600	E1
1	916600	916830	E2
1	916830	917910	E1
1	917910	918370	E2
1	918370	921600	E1
1	921600	921800	E2
1	921800	922090	E1
1	922090	922510	E2
1	922510	923330	E1
1	923330	923410	E2
1	923410	927140	E1
1	927140	927330	E2
1	927330	929110	E1
1	929110	929170	E2
1	929170	929770	E1
1	929770	931050	E2
1	931050	931530	E1
1	931530	933760	E2
1	933760	936380	E1
1	936380	937920	E2
1	937920	938870	E1
1	938870	938910	E0
1	938910	943340	E1
1	943340	943840	E2
1	943840	944560	E1
1	944560	944630	E2
1	944630	951790	E1
1	951790	952460	E2
1	952460	952970	E1
1	952970	953220	E2
1	953220	956520	E1
1	956520	957360	E2
1	957360	957980	E1
1	957980	958320	E2
1	958320	960830	E1
1	960830	960910	E2
1	960910	961250	E1
1	961250	962050	E2
1	962050	966710	E1
1	966710	967090	E2
1	967090	967620	E1
1	967620	967790	E2
1	967790	970650	E1
1	970650	970910	E2
1	970910	972920	E1
1	972920	973380	E2
1	973380	973800	E1
1	973800	974020	E2
1	974020	974860	E1
1	974860	975830	E2
1	975830	976500	E1
1	976500	976690	E2
1	976690	977660	E1
1	977660	979570	E2
1	979570	981840	E1
1	981840	982570	E2
1	982570	983190	E1
1	983190	984830	E2
1	984830	989760	E1
1	989760	989860	E0
1	989860	991040	E1
1	991040	991210	E2
1	991210	992970	E1
1	992970	993490	E2
1	993490	995840	E1
1	995840	996160	E2
1	996160	1000570	E1
1	1000570	1001200	E2
1	1001200	1004550	E1
1	1004550	1004790	E2
1	1004790	1005020	E1
1	1005020	1005090	E2
1	1005090	1008160	E1
1	1008160	1008560	E2
1	1008560	1010970	E1
1	1010970	1011480	E2
1	1011480	1017660	E1
1	1017660	1018180	E2
1	1018180	1019110	E1
1	1019110	1019200	E2
1	1019200	1022070	E1
1	1022070	1022340	E2
1	1022340	1022710	E1
1	1022710	1022900	E2
1	1022900	1023800	E1
1	1023800	1024680	E2
1	1024680	1028280	E1
1	1028280	1029470	E2
1	1029470	1030530	E1
1	1030530	1031110	E2
1	1031110	1036140	E1
1	1036140	1036540	E2
1	1036540	1040220	E1
1	1040220	1040520	E2
1	1040520	1043210	E1
1	1043210	1043490	E2
1	1043490	1043580	E1
1	1043580	1043910	E2
1	1043910	1044340	E1
1	1044340	1044470	E2
1	1044470	1044760	E1
1	1044760	1045200	E2
1	1045200	1045690	E1
1	1045690	1045910	E2
1	1045910	1047090	E1
1	1047090	1047100	E0
1	1047100	1049760	E1
1	1049760	1050310	E2
1	1050310	1051150	E1
1	1051150	1051410	E2
1	1051410	1059280	E1
1	1059280	1059500	E2
1	1059500	1064240	E1
1	1064240	1064770	E2
1	1064770	1070820	E1
1	1070820	1073420	E2
1	1073420	1075140	E1
1	1075140	1075460	E2
1	1075460	1080530	E1
1	1080530	1081420	E2
1	1081420	1084310	E1
1	1084310	1086210	E2
1	1086210	1096200	E1
1	1096200	1097020	E2
1	1097020	1101850	E1
1	1101850	1102140	E2
1	1102140	1103170	E1
1	1103170	1103490	E2
1	1103490	1103950	E1
1	1103950	1104210	E2
1	1104210	1104460	E1
1	1104460	1104550	E2
1	1104550	1104870	E1
1	1104870	1104990	E2
1	1104990	1105410	E1
1	1105410	1105560	E2
1	1105560	1105930	E1
1	1105930	1106540	E2
1	1106540	1108640	E1
1	1108640	1109490	E2
1	1109490	1114020	E1
1	1114020	1114470	E2
1	1114470	1114950	E1
1	1114950	1115070	E2
1	1115070	1121280	E1
1	1121280	1121460	E2
1	1121460	1123340	E1
1	1123340	1123450	E2
1	1123450	1124420	E1
1	1124420	1124610	E2
1	1124610	1125250	E1
1	1125250	1125570	E2
1	1125570	1129340	E1
1	1129340	1131100	E2
1	1131100	1131350	E1
1	1131350	1132150	E2
1	1132150	1132470	E1
1	1132470	1132890	E2
1	1132890	1133510	E1
1	1133510	1134930	E2
1	1134930	1135430	E1
1	1135430	1136300	E2
1	1136300	1136590	E1
1	1136590	1136670	E2
1	1136670	1136820	E1
1	1136820	1136910	E2
1	1136910	1139680	E1
1	1139680	1140410	E2
1	1140410	1140560	E1
1	1140560	1140680	E2
1	1140680	1140890	E1
1	1140890	1141720	E2
1	1141720	1142990	E1
1	1142990	1144100	E2
1	1144100	1145750	E1
1	1145750	1145940	E2
1	1145940	1146480	E1
1	1146480	1147020	E2
1	1147020	1147550	E1
1	1147550	1147750	E2
1	1147750	1148500	E1
1	1148500	1148750	E2
1	1148750	1154560	E1
1	1154560	1155330	E2
1	1155330	1157700	E1
1	1157700	1158220	E2
1	1158220	1158970	E1
1	1158970	1159420	E2
1	1159420	1159950	E1
1	1159950	1160020	E2
1	1160020	1160580	E1
1	1160580	1161010	E0
1	1161010	1161940	E1
1	1161940	1162140	E2
1	1162140	1164810	E1
1	1164810	1165250	E2
1	1165250	1166810	E1
1	1166810	1167390	E2
1	1167390	1168850	E1
1	1168850	1170140	E2
1	1170140	1170650	E1
1	1170650	1170850	E2
1	1170850	1171610	E1
1	1171610	1171830	E2
1	1171830	1172840	E1
1	1172840	1173450	E2
1	1173450	1174280	E1
1	1174280	1174460	E2
1	1174460	1174910	E1
1	1174910	1175070	E2
1	1175070	1183680	E1
1	1183680	1184030	E2
1	1184030	1185370	E1
1	1185370	1185770	E2
1	1185770	1188290	E1
1	1188290	1189540	E2
1	1189540	1191180	E1
1	1191180	1191650	E2
1	1191650	1193720	E1
1	1193720	1194200	E2
1	1194200	1195500	E1
1	1195500	1195990	E2
1	1195990	1197500	E1
1	1197500	1198260	E2
1	1198260	1201250	E1
1	1201250	1202300	E2
1	1202300	1206370	E1
1	1206370	1206720	E2
1	1206720	1207150	E1
1	1207150	1207280	E2
1	1207280	1210910	E1
1	1210910	1211110	E2
1	1211110	1215560	E1
1	1215560	1216140	E2
1	1216140	1219970	E1
1	1219970	1220140	E2
1	1220140	1220780	E1
1	1220780	1221240	E2
1	1221240	1222220	E1
1	1222220	1222300	E2
1	1222300	1224500	E1
1	1224500	1225220	E2
1	1225220	1226260	E1
1	1226260	1226650	E2
1	1226650	1230850	E1
1	1230850	1231610	E2
1	1231610	1232280	E1
1	1232280	1232630	E2
1	1232630	1233200	E1
1	1233200	1233840	E2
1	1233840	1235930	E1
1	1235930	1236820	E2
1	1236820	1238930	E1
1	1238930	1239080	E2
1	1239080	1240150	E1
1	1240150	1240460	E2
1	1240460	1242450	E1
1	1242450	1242670	E2
1	1242670	1244080	E1
1	1244080	1244460	E2
1	1244460	1246170	E1
1	1246170	1246320	E2
1	1246320	1248810	E1
1	1248810	1249430	E2
1	1249430	1250110	E1
1	1250110	1250120	E0
1	1250120	1250470	E1
1	1250470	1250480	E0
1	1250480	1253680	E1
1	1253680	1253730	E0
1	1253730	1255920	E1
1	1255920	1255990	E0
1	1255990	1256260	E1
1	1256260	1256330	E0
1	1256330	1258330	E1
1	1258330	1258590	E2
1	1258590	1261410	E1
1	1261410	1261750	E2
1	1261750	1269080	E1
1	1269080	1269120	E0
1	1269120	1269190	E1
1	1269190	1269270	E0
1	1269270	1272530	E1
1	1272530	1272740	E2
1	1272740	1274110	E1
1	1274110	1274360	E2
1	1274360	1275480	E1
1	1275480	1275550	E2
1	1275550	1280990	E1
1	1280990	1281280	E2
1	1281280	1286530	E1
1	1286530	1286780	E2
1	1286780	1288740	E1
1	1288740	1288930	E2
1	1288930	1291060	E1
1	1291060	1291330	E2
1	1291330	1291890	E1
1	1291890	1292150	E2
1	1292150	1293210	E1
1	1293210	1293560	E2
1	1293560	1294370	E1
1	1294370	1294560	E2
1	1294560	1298980	E1
1	1298980	1299630	E2
1	1299630	1303070	E1
1	1303070	1303280	E2
1	1303280	1305480	E1
1	1305480	1306180	E2
1	1306180	1306430	E1
1	1306430	1307360	E2
1	1307360	1307480	E1
1	1307480	1309590	E2
1	1309590	1309810	E1
1	1309810	1309950	E2
1	1309950	1310680	E1
1	1310680	1311340	E2
1	1311340	1312240	E1
1	1312240	1312340	E2
1	1312340	1312450	E1
1	1312450	1313610	E2
1	1313610	1315710	E1
1	1315710	1315850	E2
1	1315850	1320800	E1
1	1320800	1321980	E2
1	1321980	1324660	E1
1	1324660	1325190	E2
1	1325190	1331180	E1
1	1331180	1331530	E2
1	1331530	1333510	E1
1	1333510	1333960	E2
1	1333960	1336220	E1
1	1336220	1336500	E2
1	1336500	1337830	E1
1	1337830	1339670	E2
1	1339670	1343580	E1
1	1343580	1344210	E2
1	1344210	1344390	E1
1	1344390	1345070	E2
1	1345070	1348790	E1
1	1348790	1348800	E0
1	1348800	1349690	E1
1	1349690	1350240	E2
1	1350240	1355370	E1
1	1355370	1356280	E2
1	1356280	1358350	E1
1	1358350	1358710	E2
1	1358710	1361980	E1
1	1361980	1362660	E2
1	1362660	1364950	E1
1	1364950	1365320	E2
1	1365320	1368610	E1
1	1368610	1369140	E2
1	1369140	1375690	E1
1	1375690	1375940	E2
1	1375940	1383310	E1
1	1383310	1383440	E2
1	1383440	1383740	E1
1	1383740	1383890	E2
1	1383890	1389000	E1
1	1389000	1389070	E2
1	1389070	1391150	E1
1	1391150	1391400	E2
1	1391400	1391640	E1
1	1391640	1391800	E2
1	1391800	1393060	E1
1	1393060	1393070	E0
1	1393070	1395990	E1
1	1395990	1396390	E2
1	1396390	1399040	E1
1	1399040	1399250	E2
1	1399250	1400760	E1
1	1400760	1400910	E2
1	1400910	1407460	E1
1	1407460	1407840	E2
1	1407840	1410710	E1
1	1410710	1411180	E2
1	1411180	1416130	E1
1	1416130	1416300	E2
1	1416300	1418390	E1
1	1418390	1419140	E2
1	1419140	1421630	E1
1	1421630	1424470	E2
1	1424470	1425090	E1
1	1425090	1425610	E2
1	1425610	1426350	E1
1	1426350	1427090	E2
1	1427090	1430200	E1
1	1430200	1430360	E2
1	1430360	1430890	E1
1	1430890	1431470	E2
1	1431470	1431700	E1
1	1431700	1431800	E2
1	1431800	1432660	E1
1	1432660	1435310	E2
1	1435310	1436690	E1
1	1436690	1436850	E2
1	1436850	1437410	E1
1	1437410	1437990	E2
1	1437990	1441360	E1
1	1441360	1441510	E2
1	1441510	1443580	E1
1	1443580	1443770	E0
1	1443770	1444050	E1
1	1444050	1444150	E0
1	1444150	1445020	E1
1	1445020	1445180	E2
1	1445180	1446300	E1
1	1446300	1446330	E0
1	1446330	1447390	E1
1	1447390	1447460	E2
1	1447460	1450820	E1
1	1450820	1451230	E2
1	1451230	1452850	E1
1	1452850	1452920	E2
1	1452920	1454540	E1
1	1454540	1454770	E2
1	1454770	1455150	E1
1	1455150	1457000	E2
1	1457000	1458620	E1
1	1458620	1459170	E2
1	1459170	1461050	E1
1	1461050	1461140	E2
1	1461140	1462130	E1
1	1462130	1462720	E2
1	1462720	1462880	E1
1	1462880	1463130	E2
1	1463130	1463240	E1
1	1463240	1463290	E0
1	1463290	1463390	E1
1	1463390	1463890	E0
1	1463890	1464130	E1
1	1464130	1465780	E0
1	1465780	1466980	E1
1	1466980	1467010	E0
1	1467010	1467700	E1
1	1467700	1467810	E2
1	1467810	1468190	E1
1	1468190	1468340	E2
1	1468340	1468640	E1
1	1468640	1468760	E2
1	1468760	1468930	E1
1	1468930	1469580	E2
1	1469580	1470380	E1
1	1470380	1470730	E2
1	1470730	1471210	E1
1	1471210	1471310	E2
1	1471310	1476120	E1
1	1476120	1476420	E2
1	1476420	1477180	E1
1	1477180	1477710	E2
1	1477710	1478650	E1
1	1478650	1479640	E2
1	1479640	1479880	E1
1	1479880	1480110	E2
1	1480110	1480890	E1
1	1480890	1480960	E2
1	1480960	1482020	E1
1	1482020	1482670	E2
1	1482670	1486910	E1
1	1486910	1487350	E2
1	1487350	1490870	E1
1	1490870	1491110	E2
1	1491110	1494200	E1
1	1494200	1494970	E2
1	1494970	1495360	E1
1	1495360	1495440	E2
1	1495440	1496200	E1
1	1496200	1496290	E2
1	1496290	1496550	E1
1	1496550	1496860	E2
1	1496860	1497550	E1
1	1497550	1498320	E2
1	1498320	1499740	E1
1	1499740	1499760	E0
1	1499760	1502270	E1
1	1502270	1502340	E2
1	1502340	1503760	E1
1	1503760	1505190	E2
1	1505190	1510240	E1
1	1510240	1510400	E2
1	1510400	1511720	E1
1	1511720	1511890	E2
1	1511890	1517760	E1
1	1517760	1518070	E2
1	1518070	1518730	E1
1	1518730	1519010	E2
1	1519010	1519990	E1
1	1519990	1520320	E2
1	1520320	1520460	E1
1	1520460	1520690	E2
1	1520690	1521170	E1
1	1521170	1522500	E0
1	1522500	1523530	E1
1	1523530	1523680	E2
1	1523680	1524990	E1
1	1524990	1525510	E2
1	1525510	1525900	E1
1	1525900	1527060	E0
1	1527060	1527690	E1
1	1527690	1527770	E2
1	1527770	1529140	E1
1	1529140	1529300	E2
1	1529300	1529680	E1
1	1529680	1529760	E2
1	1529760	1531300	E1
1	1531300	1531460	E2
1	1531460	1534320	E1
1	1534320	1534650	E2
1	1534650	1534790	E1
1	1534790	1534880	E2
1	1534880	1544920	E1
1	1544920	1547040	E2
1	1547040	1547750	E1
1	1547750	1549450	E2
1	1549450	1549720	E1
1	1549720	1550770	E2
1	1550770	1551470	E1
1	1551470	1551570	E2
1	1551570	1553340	E1
1	1553340	1553640	E2
1	1553640	1558460	E1
1	1558460	1558710	E2
1	1558710	1558960	E1
1	1558960	1560620	E2
1	1560620	1564060	E1
1	1564060	1564620	E2
1	1564620	1567890	E1
1	1567890	1568030	E2
1	1568030	1568770	E1
1	1568770	1570970	E2
1	1570970	1571150	E1
1	1571150	1571220	E2
1	1571220	1571500	E1
1	1571500	1571770	E2
1	1571770	1572400	E1
1	1572400	1572590	E2
1	1572590	1575860	E1
1	1575860	1575990	E2
1	1575990	1576330	E1
1	1576330	1576910	E2
1	1576910	1582470	E1
1	1582470	1582590	E2
1	1582590	1583620	E1
1	1583620	1584150	E2
1	1584150	1587680	E1
1	1587680	1588540	E2
1	1588540	1589820	E1
1	1589820	1590100	E2
1	1590100	1593850	E1
1	1593850	1594030	E2
1	1594030	1595770	E1
1	1595770	1596160	E2
1	1596160	1597910	E1
1	1597910	1598170	E2
1	1598170	1598300	E1
1	1598300	1598670	E2
1	1598670	1598760	E1
1	1598760	1598880	E2
1	1598880	1599590	E1
1	1599590	1599920	E2
1	1599920	1604040	E1
1	1604040	1604070	E0
1	1604070	1604970	E1
1	1604970	1605180	E2
1	1605180	1606750	E1
1	1606750	1606970	E2
1	1606970	1607700	E1
1	1607700	1608060	E2
1	1608060	1608260	E1
1	1608260	1608420	E2
1	1608420	1611620	E1
1	1611620	1611950	E2
1	1611950	1612560	E1
1	1612560	1612700	E2
1	1612700	1613070	E1
1	1613070	1613160	E2
1	1613160	1614050	E1
1	1614050	1614110	E0
1	1614110	1616750	E1
1	1616750	1616820	E2
1	1616820	1617180	E1
1	1617180	1617340	E2
1	1617340	1618090	E1
1	1618090	1618300	E2
1	1618300	1620110	E1
1	1620110	1620120	E0
1	1620120	1623560	E1
1	1623560	1623730	E2
1	1623730	1624280	E1
1	1624280	1625020	E2
1	1625020	1635820	E1
1	1635820	1636050	E2
1	1636050	1637900	E1
1	1637900	1638120	E2
1	1638120	1638850	E1
1	1638850	1639260	E2
1	1639260	1642730	E1
1	1642730	1643290	E2
1	1643290	1644100	E1
1	1644100	1644320	E2
1	1644320	1645230	E1
1	1645230	1645770	E2
1	1645770	1647100	E1
1	1647100	1647950	E2
1	1647950	1659410	E1
1	1659410	1661850	E2
1	1661850	1662080	E1
1	1662080	1662590	E2
1	1662590	1663090	E1
1	1663090	1663480	E2
1	1663480	1669260	E1
1	1669260	1669420	E2
1	1669420	1671620	E1
1	1671620	1671950	E2
1	1671950	1678810	E1
1	1678810	1679110	E2
1	1679110	1680590	E1
1	1680590	1680720	E2
1	1680720	1681660	E1
1	1681660	1682410	E2
1	1682410	1689910	E1
1	1689910	1690190	E2
1	1690190	1693640	E1
1	1693640	1693900	E2
1	1693900	1701000	E1
1	1701000	1701400	E2
1	1701400	1702670	E1
1	1702670	1703180	E2
1	1703180	1704600	E1
1	1704600	1705410	E2
1	1705410	1706670	E1
1	1706670	1707050	E2
1	1707050	1709180	E1
1	1709180	1709620	E2
1	1709620	1713200	E1
1	1713200	1715010	E2
1	1715010	1715800	E1
1	1715800	1715990	E2
1	1715990	1718860	E1
1	1718860	1719050	E2
1	1719050	1721320	E1
1	1721320	1721530	E2
1	1721530	1725260	E1
1	1725260	1725450	E2
1	1725450	1726550	E1
1	1726550	1726620	E2
1	1726620	1729380	E1
1	1729380	1729630	E2
1	1729630	1730090	E1
1	1730090	1730160	E2
1	1730160	1732540	E1
1	1732540	1732890	E2
1	1732890	1739250	E1
1	1739250	1739850	E2
1	1739850	1740180	E1
1	1740180	1740270	E2
1	1740270	1740890	E1
1	1740890	1741030	E2
1	1741030	1743390	E1
1	1743390	1743450	E2
1	1743450	1743830	E1
1	1743830	1744870	E2
1	1744870	1745440	E1
1	1745440	1746350	E2
1	1746350	1747870	E1
1	1747870	1748370	E2
1	1748370	1753890	E1
1	1753890	1754280	E2
1	1754280	1761920	E1
1	1761920	1762240	E2
1	1762240	1766270	E1
1	1766270	1766800	E2
1	1766800	1768480	E1
1	1768480	1769070	E2
1	1769070	1773270	E1
1	1773270	1775070	E2
1	1775070	1776010	E1
1	1776010	1776020	E0
1	1776020	1778940	E1
1	1778940	1779020	E2
1	1779020	1779100	E1
1	1779100	1779420	E2
1	1779420	1784530	E1
1	1784530	1784750	E2
1	1784750	1786450	E1
1	1786450	1786830	E2
1	1786830	1789800	E1
1	1789800	1790190	E2
1	1790190	1798940	E1
1	1798940	1799320	E2
1	1799320	1803950	E1
1	1803950	1804220	E2
1	1804220	1807590	E1
1	1807590	1808300	E2
1	1808300	1811180	E1
1	1811180	1811270	E2
1	1811270	1815440	E1
1	1815440	1816200	E2
1	1816200	1817270	E1
1	1817270	1817620	E2
1	1817620	1819650	E1
1	1819650	1819740	E2
1	1819740	1819870	E1
1	1819870	1820530	E2
1	1820530	1821730	E1
1	1821730	1822670	E2
1	1822670	1824390	E1
1	1824390	1824480	E2
1	1824480	1828390	E1
1	1828390	1828540	E2
1	1828540	1829750	E1
1	1829750	1830630	E2
1	1830630	1832450	E1
1	1832450	1832690	E2
1	1832690	1837570	E1
1	1837570	1838540	E2
1	1838540	1839650	E1
1	1839650	1839860	E2
1	1839860	1840900	E1
1	1840900	1841200	E2
1	1841200	1841560	E1
1	1841560	1841700	E2
1	1841700	1849610	E1
1	1849610	1849690	E0
1	1849690	1854950	E1
1	1854950	1855250	E2
1	1855250	1855550	E1
1	1855550	1855780	E2
1	1855780	1860680	E1
1	1860680	1861270	E2
1	1861270	1861830	E1
1	1861830	1862220	E2
1	1862220	1864470	E1
1	1864470	1864640	E2
1	1864640	1868830	E1
1	1868830	1869240	E2
1	1869240	1873680	E1
1	1873680	1874880	E2
1	1874880	1876930	E1
1	1876930	1881550	E2
1	1881550	1882420	E1
1	1882420	1883040	E2
1	1883040	1883860	E1
1	1883860	1884000	E2
1	1884000	1884180	E1
1	1884180	1885090	E2
1	1885090	1887390	E1
1	1887390	1889460	E2
1	1889460	1890150	E1
1	1890150	1890550	E2
1	1890550	1890920	E1
1	1890920	1891430	E2
1	1891430	1894100	E1
1	1894100	1894480	E2
1	1894480	1896910	E1
1	1896910	1897250	E2
1	1897250	1899570	E1
1	1899570	1900050	E2
1	1900050	1906980	E1
1	1906980	1907130	E2
1	1907130	1910550	E1
1	1910550	1911150	E2
1	1911150	1919710	E1
1	1919710	1919850	E2
1	1919850	1921820	E1
1	1921820	1922380	E2
1	1922380	1925300	E1
1	1925300	1925380	E0
1	1925380	1926400	E1
1	1926400	1926750	E2
1	1926750	1930380	E1
1	1930380	1930470	E2
1	1930470	1932480	E1
1	1932480	1932620	E2
1	1932620	1933010	E1
1	1933010	1933400	E2
1	1933400	1934440	E1
1	1934440	1934530	E2
1	1934530	1938580	E1
1	1938580	1938820	E2
1	1938820	1940480	E1
1	1940480	1940770	E2
1	1940770	1941190	E1
1	1941190	1941830	E2
1	1941830	1942230	E1
1	1942230	1942420	E2
1	1942420	1942630	E1
1	1942630	1943090	E2
1	1943090	1946200	E1
1	1946200	1946300	E2
1	1946300	1946470	E1
1	1946470	1946930	E2
1	1946930	1947510	E1
1	1947510	1947590	E2
1	1947590	1950400	E1
1	1950400	1950980	E2
1	1950980	1952730	E1
1	1952730	1952950	E2
1	1952950	1953090	E1
1	1953090	1954880	E2
1	1954880	1958490	E1
1	1958490	1958940	E2
1	1958940	1961700	E1
1	1961700	1961710	E0
1	1961710	1962990	E1
1	1962990	1963530	E2
1	1963530	1964920	E1
1	1964920	1964980	E2
1	1964980	1965650	E1
1	1965650	1965870	E2
1	1965870	1966750	E1
1	1966750	1966960	E2
1	1966960	1969470	E1
1	1969470	1969820	E2
1	1969820	1973910	E1
1	1973910	1975030	E2
1	1975030	1977210	E1
1	1977210	1978350	E2
1	1978350	1989130	E1
1	1989130	1989520	E2
1	1989520	1992130	E1
1	1992130	1992400	E2
1	1992400	1996080	E1
1	1996080	1996700	E2
1	1996700	1997040	E1
1	1997040	1997210	E2
1	1997210	1998460	E1
1	1998460	1998570	E2
1	1998570	1998900	E1
1	1998900	1999400	E2
1	1999400	2000580	E1
1	2000580	2001490	E2
1	2001490	2007090	E1
1	2007090	2007710	E2
1	2007710	2013460	E1
1	2013460	2014200	E2
1	2014200	2016020	E1
1	2016020	2016350	E2
1	2016350	2024670	E1
1	2024670	2025620	E2
1	2025620	2027430	E1
1	2027430	2027810	E2
1	2027810	2029580	E1
1	2029580	2030010	E2
1	2030010	2031810	E1
1	2031810	2032420	E2
1	2032420	2033760	E1
1	2033760	2034210	E2
1	2034210	2035370	E1
1	2035370	2035870	E2
1	2035870	2040280	E1
1	2040280	2040500	E2
1	2040500	2042270	E1
1	2042270	2042330	E0
1	2042330	2047410	E1
1	2047410	2047960	E2
1	2047960	2049320	E1
1	2049320	2050030	E2
1	2050030	2052080	E1
1	2052080	2052480	E2
1	2052480	2055200	E1
1	2055200	2056150	E2
1	2056150	2060310	E1
1	2060310	2060440	E2
1	2060440	2067310	E1
1	2067310	2067530	E2
1	2067530	2070260	E1
1	2070260	2070790	E2
1	2070790	2072250	E1
1	2072250	2072260	E0
1	2072260	2077030	E1
1	2077030	2077040	E0
1	2077040	2077680	E1
1	2077680	2077900	E2
1	2077900	2081890	E1
1	2081890	2081990	E2
1	2081990	2082700	E1
1	2082700	2083430	E2
1	2083430	2086800	E1
1	2086800	2087280	E2
1	2087280	2089450	E1
1	2089450	2090250	E2
1	2090250	2091030	E1
1	2091030	2091190	E2
1	2091190	2091410	E1
1	2091410	2091600	E2
1	2091600	2092640	E1
1	2092640	2092890	E2
1	2092890	2096230	E1
1	2096230	2096580	E2
1	2096580	2103280	E1
1	2103280	2105140	E2
1	2105140	2105580	E1
1	2105580	2105620	E0
1	2105620	2107250	E1
1	2107250	2108650	E2
1	2108650	2110850	E1
1	2110850	2111500	E2
1	2111500	2114520	E1
1	2114520	2114850	E2
1	2114850	2120720	E1
1	2120720	2120930	E2
1	2120930	2123850	E1
1	2123850	2124330	E2
1	2124330	2125870	E1
1	2125870	2126550	E2
1	2126550	2128220	E1
1	2128220	2128400	E2
1	2128400	2129930	E1
1	2129930	2130290	E2
1	2130290	2135620	E1
1	2135620	2135870	E2
1	2135870	2141040	E1
1	2141040	2142790	E2
1	2142790	2143800	E1
1	2143800	2144480	E2
1	2144480	2145440	E1
1	2145440	2145610	E2
1	2145610	2148120	E1
1	2148120	2148360	E2
1	2148360	2151700	E1
1	2151700	2151790	E2
1	2151790	2152320	E1
1	2152320	2152920	E2
1	2152920	2155920	E1
1	2155920	2156280	E2
1	2156280	2156920	E1
1	2156920	2156970	E0
1	2156970	2160640	E1
1	2160640	2161110	E2
1	2161110	2163110	E1
1	2163110	2164560	E2
1	2164560	2165140	E1
1	2165140	2166360	E2
1	2166360	2168380	E1
1	2168380	2168580	E2
1	2168580	2169740	E1
1	2169740	2170020	E2
1	2170020	2171790	E1
1	2171790	2173290	E2
1	2173290	2174870	E1
1	2174870	2175540	E2
1	2175540	2176010	E1
1	2176010	2178300	E2
1	2178300	2184020	E1
1	2184020	2184370	E2
1	2184370	2187060	E1
1	2187060	2187130	E2
1	2187130	2187520	E1
1	2187520	2188830	E2
1	2188830	2189650	E1
1	2189650	2192370	E2
1	2192370	2193730	E1
1	2193730	2194760	E2
1	2194760	2195760	E1
1	2195760	2197990	E2
1	2197990	2199800	E1
1	2199800	2200220	E2
1	2200220	2201470	E1
1	2201470	2201780	E2
1	2201780	2203540	E1
1	2203540	2204330	E2
1	2204330	2212390	E1
1	2212390	2213720	E2
1	2213720	2214020	E1
1	2214020	2215260	E2
1	2215260	2219440	E1
1	2219440	2219810	E2
1	2219810	2220160	E1
1	2220160	2220440	E2
1	2220440	2222870	E1
1	2222870	2223910	E2
1	2223910	2224440	E1
1	2224440	2225990	E2
1	2225990	2226930	E1
1	2226930	2227790	E2
1	2227790	2228440	E1
1	2228440	2228500	E2
1	2228500	2229250	E1
1	2229250	2229700	E2
1	2229700	2233050	E1
1	2233050	2233690	E2
1	2233690	2234190	E1
1	2234190	2234280	E0
1	2234280	2234410	E1
1	2234410	2234930	E0
1	2234930	2235730	E1
1	2235730	2235930	E2
1	2235930	2236180	E1
1	2236180	2236690	E2
1	2236690	2236870	E1
1	2236870	2237000	E2
1	2237000	2237430	E1
1	2237430	2238110	E2
1	2238110	2239820	E1
1	2239820	2240720	E2
1	2240720	2240970	E1
1	2240970	2241950	E2
1	2241950	2244920	E1
1	2244920	2245480	E2
1	2245480	2248740	E1
1	2248740	2249190	E2
1	2249190	2250490	E1
1	2250490	2250940	E2
1	2250940	2260100	E1
1	2260100	2260280	E2
1	2260280	2262820	E1
1	2262820	2263070	E2
1	2263070	2266360	E1
1	2266360	2266690	E2
1	2266690	2269040	E1
1	2269040	2270500	E2
1	2270500	2274710	E1
1	2274710	2274970	E2
1	2274970	2277460	E1
1	2277460	2277900	E2
1	2277900	2280130	E1
1	2280130	2281010	E2
1	2281010	2282030	E1
1	2282030	2282170	E2
1	2282170	2282800	E1
1	2282800	2283360	E2
1	2283360	2284110	E1
1	2284110	2286530	E2
1	2286530	2287690	E1
1	2287690	2287910	E2
1	2287910	2289330	E1
1	2289330	2289420	E2
1	2289420	2291240	E1
1	2291240	2291500	E2
1	2291500	2291830	E1
1	2291830	2292070	E0
1	2292070	2294530	E1
1	2294530	2294660	E2
1	2294660	2296630	E1
1	2296630	2296700	E2
1	2296700	2298740	E1
1	2298740	2299080	E0
1	2299080	2299430	E1
1	2299430	2301550	E2
1	2301550	2301960	E1
1	2301960	2302170	E2
1	2302170	2302700	E1
1	2302700	2302920	E2
1	2302920	2303290	E1
1	2303290	2303380	E2
1	2303380	2305060	E1
1	2305060	2305600	E2
1	2305600	2309720	E1
1	2309720	2309790	E2
1	2309790	2311970	E1
1	2311970	2313710	E2
1	2313710	2316320	E1
1	2316320	2316830	E2
1	2316830	2317410	E1
1	2317410	2317720	E2
1	2317720	2317910	E1
1	2317910	2318210	E2
1	2318210	2321680	E1
1	2321680	2322630	E2
1	2322630	2333410	E1
1	2333410	2334900	E2
1	2334900	2335520	E1
1	2335520	2336260	E2
1	2336260	2338400	E1
1	2338400	2338830	E2
1	2338830	2339210	E1
1	2339210	2340250	E2
1	2340250	2340760	E1
1	2340760	2341550	E2
1	2341550	2342120	E1
1	2342120	2342210	E2
1	2342210	2344320	E1
1	2344320	2344470	E2
1	2344470	2346680	E1
1	2346680	2349120	E2
1	2349120	2351350	E1
1	2351350	2352260	E2
1	2352260	2357780	E1
1	2357780	2358010	E2
1	2358010	2358880	E1
1	2358880	2359070	E2
1	2359070	2364730	E1
1	2364730	2367270	E2
1	2367270	2368360	E1
1	2368360	2368940	E2
1	2368940	2373350	E1
1	2373350	2373730	E0
1	2373730	2374380	E1
1	2374380	2375230	E2
1	2375230	2375980	E1
1	2375980	2376070	E2
1	2376070	2376650	E1
1	2376650	2376810	E2
1	2376810	2379450	E1
1	2379450	2379710	E2
1	2379710	2381200	E1
1	2381200	2381620	E2
1	2381620	2383060	E1
1	2383060	2383090	E0
1	2383090	2389350	E1
1	2389350	2390500	E2
1	2390500	2392420	E1
1	2392420	2393210	E2
1	2393210	2393480	E1
1	2393480	2393810	E2
1	2393810	2394060	E1
1	2394060	2394260	E2
1	2394260	2394950	E1
1	2394950	2395580	E2
1	2395580	2402860	E1
1	2402860	2403300	E2
1	2403300	2405910	E1
1	2405910	2406070	E2
1	2406070	2406600	E1
1	2406600	2407200	E2
1	2407200	2407320	E1
1	2407320	2407650	E2
1	2407650	2407740	E1
1	2407740	2408210	E2
1	2408210	2409310	E1
1	2409310	2409500	E0
1	2409500	2409540	E1
1	2409540	2410090	E2
1	2410090	2410700	E1
1	2410700	2410740	E0
1	2410740	2411170	E1
1	2411170	2411260	E0
1	2411260	2412490	E1
1	2412490	2412610	E0
1	2412610	2412790	E1
1	2412790	2413010	E2
1	2413010	2414130	E1
1	2414130	2414270	E2
1	2414270	2416040	E1
1	2416040	2416280	E2
1	2416280	2417320	E1
1	2417320	2417660	E0
1	2417660	2417740	E1
1	2417740	2417800	E0
1	2417800	2421780	E1
1	2421780	2422330	E2
1	2422330	2423880	E1
1	2423880	2424120	E2
1	2424120	2429500	E1
1	2429500	2429740	E2
1	2429740	2431990	E1
1	2431990	2433800	E2
1	2433800	2436020	E1
1	2436020	2436080	E2
1	2436080	2436660	E1
1	2436660	2437630	E2
1	2437630	2439230	E1
1	2439230	2440930	E2
1	2440930	2441350	E1
1	2441350	2441750	E2
1	2441750	2442360	E1
1	2442360	2442590	E2
1	2442590	2442720	E1
1	2442720	2442850	E2
1	2442850	2443080	E1
1	2443080	2443970	E2
1	2443970	2445010	E1
1	2445010	2446190	E2
1	2446190	2446860	E1
1	2446860	2446880	E0
1	2446880	2448040	E1
1	2448040	2448050	E0
1	2448050	2454600	E1
1	2454600	2454940	E2
1	2454940	2455790	E1
1	2455790	2456530	E0
1	2456530	2456960	E1
1	2456960	2458320	E2
1	2458320	2459840	E1
1	2459840	2459880	E0
1	2459880	2460650	E1
1	2460650	2460890	E2
1	2460890	2461920	E1
1	2461920	2462590	E2
1	2462590	2462960	E1
1	2462960	2463080	E2
1	2463080	2463820	E1
1	2463820	2464570	E0
1	2464570	2465410	E1
1	2465410	2465800	E2
1	2465800	2467010	E1
1	2467010	2467230	E2
1	2467230	2472590	E1
1	2472590	2472700	E2
1	2472700	2474900	E1
1	2474900	2475380	E2
1	2475380	2476370	E1
1	2476370	2477090	E2
1	2477090	2483070	E1
1	2483070	2483210	E2
1	2483210	2485010	E1
1	2485010	2485200	E2
1	2485200	2487970	E1
1	2487970	2488410	E2
1	2488410	2488590	E1
1	2488590	2489580	E2
1	2489580	2493180	E1
1	2493180	2493930	E2
1	2493930	2494270	E1
1	2494270	2494500	E2
1	2494500	2498570	E1
1	2498570	2499090	E2
[truncated: 110,328 more rows]
