# Supplementary material for: AP1 is a pioneer transcription factor that programmes cell fate through MADS-domain protein tetramerisation
Source: Genome Biol. 2025 Dec 9;26:418. doi: 10.1186/s13059-025-03884-0 (PMC12687491; doi:10.1186/s13059-025-03884-0)
Supplement: Supplementary file 8 — Additional file 8: Table S7. List of primer sequences. [file 13059_2025_3884_MOESM8_ESM.xlsx]

## Sheet: Sheet1
List of primer seqeunces
Original	CTGGAGAATCCCGGTGCCGAGGCCGCTCAATTGGTCGTAGACAGCTCTAGCACCGCTTAAACGCACGTACGCGCTGTCCCCCGCGTTTTAACCGCCAAGGGGATTACTCCCTAGTCTCCAGGCACGTGTCAGATATATACATCCTGT
Dyad	CTGGAGAATCCCGGTGCCGAGGCCGCTCAATTGGTCGTAGACAGCTCTAGCACCGCTTAAACGCACGTTTACCATAAATGGTAAGTTTTAACCGCCAAGGGGATTACTCCCTAGTCTCCAGGCACGTGTCAGATATATACATCCTGT
SHL1	CTGGAGAATCCCGGTGCCGAGGCCGCTCAATTGGTCGTAGACAGCTTTACCATAAATGGTAAGCACGTACGCGCTGTCCCCCGCGTTTTAACCGCCAAGGGGATTACTCCCTAGTCTCCAGGCACGTGTCAGATATATACATCCTGT
SHL4	CTGGAGAATCCCGGTGCCGAGTTACCATAAATGGTAATAGACAGCTCTAGCACCGCTTAAACGCACGTACGCGCTGTCCCCCGCGTTTTAACCGCCAAGGGGATTACTCCCTAGTCTCCAGGCACGTGTCAGATATATACATCCTG
Primer sequences used for the amplification of native genomic regions for nucleosomal DNA binding assay
Nuc_AG_intron_F	CATATACAGGAAACTCAAGAAAAAAG
Nuc_AG_intron_R	TGGGTATAAATCCAATAGACATTTG
Nuc_AP1_pro_F	ATGTATATGGAGATCATGAGCAAAAG
Nuc_AP1_pro_R	GGAAGAAAAGAAGGGTGGAG
Nuc_SEP3_tss_F	ATTGCTTTTTAAAGTGTACATATACATTTG
Nuc_SEP3_tss_R	TTTGAATAAATCCTATGAGGGTCTTTG
Coding sequences cloned into pGEX-6P-1 vector for protein expression in E.coli
SEP3_Cdel	ATGGGAAGAGGGAGAGTAGAATTGAAGAGGATAGAGAACAAGATCAATAGGCAAGTGACGTTTGCAAAGAGAAGGAATGGTCTTTTGAAGAAAGCATACGAGCTTTCAGTTCTATGTGATGCAGAAGTTGCTCTCATCATCTTCTCAAATAGAGGAAAGCTGTACGAGTTTTGCAGTAGTTCGAGCATGCTTCGGACACTGGAGAGGTACCAAAAGTGTAACTATGGAGCACCAGAACCCAATGTGCCTTCAAGAGAGGCCTTAGCAGTTGAACTTAGTAGCCAGCAGGAGTATCTCAAGCTTAAGGAGCGTTATGACGCCTTACAGAGAACCCAAAGGAATCTGTTGGGAGAAGATCTTGGACCTCTAAGTACAAAGGAGCTTGAGTCACTTGAGAGA…
AP1_Cdel	ATGGGAAGGGGTAGGGTTCAATTGAAGAGGATAGAGAACAAGATCAATAGACAAGTGACATTCTCGAAAAGAAGAGCTGGTCTTTTGAAGAAAGCTCATGAGATCTCTGTTCTCTGTGATGCTGAAGTTGCTCTTGTTGTCTTCTCCCATAAGGGAAAACTCTTCGAATACTCCACTGATTCTTGTATGGAGAAGATACTTGAACGCTATGAGAGGTACTCTTACGCCGAAAGACAGCTTATTGCACCTGAGTCCGACGTCAATACAAACTGGTCGATGGAGTATAACAGGCTTAAGGCTAAGATTGAGCTTTTGGAGAGAAACCAGAGGCATTATCTTGGGGAAGACTTGCAAGCAATGAGCCCTAAAGAGCTTCAGAATCTGGAGCAGCAGCTTGAC…
AP1_Cdel_tet	ATGGGAAGGGGTAGGGTTCAATTGAAGAGGATAGAGAACAAGATCAATAGACAAGTGACATTCTCGAAAAGAAGAGCTGGTCTTTTGAAGAAAGCTCATGAGATCTCTGTTCTCTGTGATGCTGAAGTTGCTCTTGTTGTCTTCTCCCATAAGGGAAAACTCTTCGAATACTCCACTGATTCTTGTATGGAGAAGATACTTGAACGCTATGAGAGGTACTCTTACGCCGAAAGACAGCTTATTGCACCTGAGTCCGACGTCAATACAAACTGGTCGATGGAGTATAACAGGCTTAAGGCTAAGATTGAGCTTTTGGAGAGAAACCAGAGGCATTATCTTGGGGAAGACTTGCAAGCAATGAGCCCTAAAGAGCTTCAGAATCTGGAGCAGCAGCTTGAC…
Primers for site-directed mutagenesis to generate AP1dpm using PCR
gAP1_L154P_F	GAGTCCATCAATGAGCCCCAAAAAAAGGTATGT
gAP1_L154P_R	ACATACCTTTTTTTGGGGCTCATTGATGGACTC
gAP1_L168P_F	GGAGCAAAACAGCATGCCTTCTAAACAGGTAACAC
gAP1_L168P_R	GTGTTACCTGTTTAGAAGGCATGCTGTTTTGCTCC
AP1 TET coding sequence
	ATGGGAAGGGGTAGGGTTCAATTGAAGAGGATAGAGAACAAGATCAATAGACAAGTGACATTCTCGAAAAGAAGAGCTGGTCTTTTGAAGAAAGCTCATGAGATCTCTGTTCTCTGTGATGCTGAAGTTGCTCTTGTTGTCTTCTCCCATAAGGGAAAACTCTTCGAATACTCCACTGATTCTTGTATGGAGAAGATACTTGAACGCTATGAGAGGTACTCTTACGCCGAAAGACAGCTTATTGCACCTGAGTCCGACGTCAATACAAACTGGTCGATGGAGTATAACAGGCTTAAGGCTAAGATTGAGCTTTTGGAGAGAAACCAGAGGCATTATCTTGGGGAAGACTTGCAAGCAATGAGCCCTAAAGAGCTTCAGAATCTGGAGCAGCAGCTTGAC…
