# Supplementary material for: AP1 is a pioneer transcription factor that programmes cell fate through MADS-domain protein tetramerisation
Source: Genome Biol. 2025 Dec 9;26:418. doi: 10.1186/s13059-025-03884-0 (PMC12687491; doi:10.1186/s13059-025-03884-0)
Supplement: Supplementary file 9 — Additional file 9: Table S8. Complementation tables for AP1WT-GFP, AP1tet-GFP and AP1dm-GFP. [file 13059_2025_3884_MOESM9_ESM.xlsx]

## Sheet: AP1 WT-GFP Lines
Complementation tables for AP1WT-GFP, AP1tet-GFP and AP1dm-GFP.
AP1 WT-GFP Lines
	Sepals	Petals
Line 1	Rescued	Rescued
Line 2	Rescued	Majority of specimens exhibited full rescue
Line 3	Rescued	Majority of specimens exhibited full rescue
Line 4	Rescued	Not Rescued
Line 5	Rescued	Not Rescued
Line 6	Not Rescued	Not Rescued
Line 9	Rescued	Rescued
Line 12	Rescued	Rescued
Line 12-2	Rescued	Rescued
Line 25	Rescued	Rescued
Line 25-3	Rescued	Rescued

## Sheet: AP1 TET-GFP Lines
AP1 TET-GFP Lines
	Sepals	Petals
Line 1	Not rescued - bract-like	Partial rescue - 2/5 inflorescences have 1 or 2 flowers with 1 or 2 petals
	sepals formed
Line 2	Not rescued - bract-like	Partial rescue - 2/5 inflorescences have 1 or 2 flowers with 1 or 2 petals
	sepals formed
Line 3	Not rescued - bract-like	Partial rescue - 2/5 inflorescences have 1 or 2 flowers with 1 or 2 petals
	sepals formed
Line 4	Not rescued - bract-like	Partial rescue - 2/7 inflorescences have 1 or 2 flowers with 1 or 2 petals
	sepals formed
Line 5	Not rescued - bract-like	Not rescued - no petals formed
	sepals formed
Line 8	Not rescued - bract-like	Not rescued - no petals formed
	sepals formed
Line 14	Not rescued - bract-like	Not rescued - no petals formed
	sepals formed
Line 14-2	Not rescued - bract-like	Not rescued - no petals formed
	sepals formed
Line 15	Not rescued - bract-like	Not rescued - no petals formed
	sepals formed
Line 15-4	Not rescued - bract-like	Not rescued - no petals formed
	sepals formed
Line 16	Not rescued - bract-like	Not rescued - no petals formed
	sepals formed

## Sheet: AP1 DM-GFP Lines
AP1 DM-GFP Lines
	Sepals	Petals
Line 1	Not rescued - bract-like	Not rescued - no petals formed
	sepals formed
Line 2	Not rescued - bract-like	Not rescued - no petals formed
	sepals formed
Line 3	Not rescued - bract-like	Not rescued - no petals formed
	sepals formed
Line 4	Not rescued - bract-like	Not rescued - no petals formed
	sepals formed
Line 5	Not rescued - bract-like	Not rescued - no petals formed
	sepals formed
Line 6	Not rescued - bract-like	Partial rescue - 2/5 inflorescences have 1 or 2 flowers with 1 or 2 petals
	sepals formed
Line 7	Not rescued - bract-like	Partial rescue - 2/5 inflorescences have 1 or 2 flowers with 1 or 2 petals
	sepals formed
Line 8	Not rescued - bract-like	Partial rescue - 1/5 inflorescences have 1 or 2 flowers with 1 or 2 petals
	sepals formed
Line 9	Not rescued - bract-like	Partial rescue - 2/5 inflorescences have 1 or 2 flowers with 1 or 2 petals
	sepals formed
Line 12	Not rescued - bract-like	Not rescued - no petals formed
	sepals formed
Line 13	Not rescued - bract-like	Partial rescue - 1/5 inflorescences have 1 or 2 flowers with 1 or 2 petals
	sepals formed
Line 14	Not rescued - bract-like	Not rescued - no petals formed
	sepals formed
Line 15	Not rescued - bract-like	Not rescued - no petals formed
	sepals formed
